# Supplementary material for: Enantioselective synthesis of tricyclic oxoquinolines via NHC-catalyzed Michael-aldol-lactamization-dehydration cascade
Source: Royal Society of Chemistry journal article supplement (doi:10.1039/d4cc00502c), 2024-01-01
Supplement: d4cc00502c1.pdf [file d4cc00502c1.pdf]

# Enantioselective synthesis of tricyclic oxoquinolines via NHC-catalyzed Michael-aldol-lactamization-dehydration cascade

Shilpa Barik, Ganga Sankar, and Akkattu T. Biju\*

Department of Organic Chemistry, Indian Institute of Science, Bangalore-560012, India

E-mail: [atbiju@iisc.ac.in](mailto:atbiju@iisc.ac.in)

## Supporting Information

|                                                                                                           |     |
|-----------------------------------------------------------------------------------------------------------|-----|
| 1. General Information                                                                                    | S2  |
| 2. General Procedure for the Optimization of the Reaction Conditions                                      | S3  |
| 3. General Procedure for the Enantioselective Synthesis of Cyclopentane-fused Quinoline-2-one Derivatives | S4  |
| 4. X-ray Data of <b>3v</b>                                                                                | S6  |
| 5. Linear Effect Study                                                                                    | S7  |
| 6. Synthesis and Characterization of 2'-Aminomalonate Derivatives                                         | S8  |
| 7. Synthesis and Characterization of Cyclopentane-fused Quinoline-2-one Derivatives                       | S14 |
| 8. <sup>1</sup> H and <sup>13</sup> C NMR spectra of 2'-Aminomalonate Derivatives                         | S39 |
| 9. <sup>1</sup> H and <sup>13</sup> C NMR Spectra of Cyclopentane-fused Quinoline-2-one Derivatives       | S49 |
| 10. HPLC Data of Cyclopentane-fused Quinoline-2-one Derivatives                                           | S80 |

## 1. General Information

Unless otherwise specified, all reactions were carried out under an atmosphere of nitrogen in oven-dried reaction vessels with Teflon screw caps. 25 °C corresponds to the room temperature of the lab when the experiments were performed. Dry toluene was purchased from commercial sources and was freshly purified by distillation over Na-benzophenone and was transferred under argon. Dry benzene was purchased from commercial sources and used as such without further purification. The  $\alpha,\beta$ -unsaturated aldehydes **2a**, **2b**, **2h**, **2s** were purchased from commercial sources and were either distilled (*liquids*) or washed with NaHCO<sub>3</sub> (*solids*), prior to use. All other  $\alpha,\beta$ -unsaturated aldehydes (**2c-2r**) were synthesized by following the literature procedure.<sup>1</sup> The triazolium salt **4** was synthesized following the literature procedure.<sup>2</sup> The bisquinone oxidant **8** was synthesized following literature procedure.<sup>3</sup> DMAP was purchased from commercial sources and was used as such without further purification. LiCl was purchased from Spectrochem and was dried by heating at 300 °C for 3 h before use.

Analytical thin layer chromatography was performed on TLC Silica gel 60 F254. Visualization was accomplished with short wave UV light or KMnO<sub>4</sub> staining solution followed by heating. Flash chromatography was performed on neutral alumina by standard techniques eluting with pet. ether-EtOAc solvent system.

All compounds were fully characterized. <sup>1</sup>H and <sup>13</sup>C NMR spectra were recorded on Bruker AV 400 and Bruker Ultrashield spectrometer in CDCl<sub>3</sub> as solvent. Chemical shifts ( $\delta$ ) are given in ppm. The residual solvent signals were used as references and the chemical shifts converted to the TMS scale (CDCl<sub>3</sub>:  $\delta$ H = 7.26 ppm,  $\delta$ C = 77.16 ppm). Infrared (FT-IR) spectra were recorded on a Bruker Alfa FT-IR,  $\nu$ -max in cm<sup>-1</sup>. HRMS (ESI) data were recorded on a Waters Xevo G2-XS Q-TOF instrument. Optical rotations were measured on JASCO P-2000 polarimeter at 25 °C using 50 mm cell of 1.0 mL capacity. HPLC analysis was performed on Agilent Technologies 1260 Infinity with Variable Wavelength Detector.

---

<sup>1</sup> (a) A. A. Wubea, A. Hufner, C. Thomaschitz, M. Blunder, M. Kollroser, R. Bauer and F. Bucar, *Bioorg. Med. Chem.*, 2011, **19**, 567; (b) S. K. Gadakh, R. S. Reddy and A. Sudalai, *Tetrahedron: Asymmetry*, 2012, **23**, 898; (c) A. Orita, G. Uehara, K. Miwa and J. Otera, *Chem. Commun.*, 2006, 4729.

<sup>2</sup> J. R. Struble and J. W. Bode, *Org. Synth.*, 2010, **87**, 362.

<sup>3</sup> M. S. Kharasch and B. S. Joshi, *J. Org. Chem.*, 1957, **22**, 1439.

## 2. General Procedure for the Optimization of Reaction Conditions

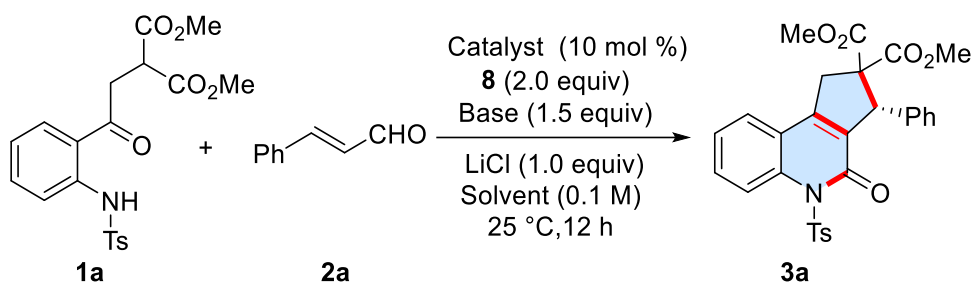

To an oven dried Schlenk tube equipped with a magnetic stir bar, LiCl (4.2 mg, 0.1 mmol) was taken from glove box then the triazolium salt (0.01 mmol), dimethyl 2-(2-(2-((4-methylphenyl)sulfonamido)phenyl)-2-oxoethyl)malonate **1a** (0.1 mmol) and bisquinone oxidant **8** (0.2 mmol) were added to it. To this mixture, solvent (1.0 mL) was added under nitrogen atmosphere and kept at 25 °C. Then cinnamaldehyde **2a** (0.2 mmol) followed by base (0.15 mmol) were added to the reaction mixture and kept for stirring at 25 °C for 12 h. After 12 h of stirring, the reaction is quenched, and the reaction mixture is diluted with CH<sub>2</sub>Cl<sub>2</sub> (2.0 mL) and filtered through a short pad of neutral alumina and eluted with EtOAc (10 mL). The solvent was evaporated to obtain the crude product, which was analysed using <sup>1</sup>H NMR using CH<sub>2</sub>Br<sub>2</sub> (7.0 μL, 0.1 mmol) as the internal standard. The enantiomeric ratio (er) was determined by HPLC analysis on a chiral stationary phase.

### Optimization Studies

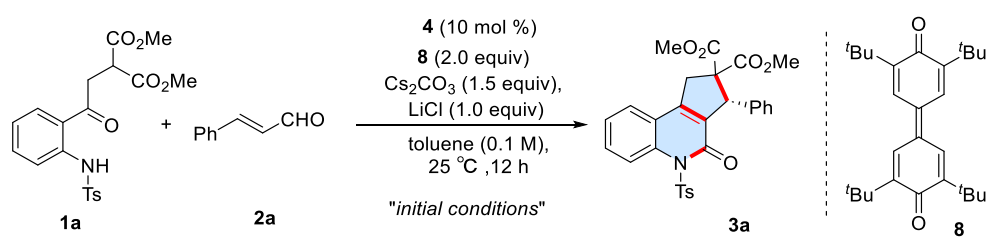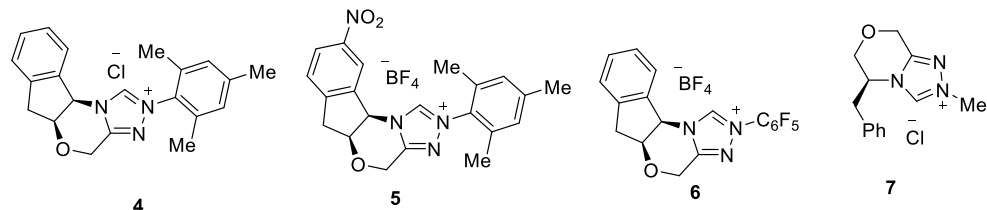

| entry | variation of the standard condition <sup>a</sup>                          | yield (%) <sup>b</sup> | er    |
|-------|---------------------------------------------------------------------------|------------------------|-------|
| 1     | None                                                                      | 23                     | 95:5  |
| 2     | <b>5</b> instead of <b>4</b>                                              | 22                     | 93:7  |
| 3     | <b>6</b> instead of <b>4</b>                                              | <5                     | -     |
| 4     | <b>7</b> instead of <b>4</b>                                              | 19                     | 22:78 |
| 5     | K <sub>2</sub> CO <sub>3</sub> instead of Cs <sub>2</sub> CO <sub>3</sub> | 8                      | 95:5  |

|                   |                                                                           |        |          |
|-------------------|---------------------------------------------------------------------------|--------|----------|
| 6                 | Na <sub>2</sub> CO <sub>3</sub> instead of K <sub>2</sub> CO <sub>3</sub> | <5     | -        |
| 7                 | KO <sup>t</sup> Bu instead of Cs <sub>2</sub> CO <sub>3</sub>             | 17     | 99:1     |
| 8                 | DBU instead of Cs <sub>2</sub> CO <sub>3</sub>                            | 37     | 85:15    |
| 9                 | DMAP instead of Cs <sub>2</sub> CO <sub>3</sub>                           | 42     | 99:1     |
| 10                | DABCO instead of Cs <sub>2</sub> CO <sub>3</sub>                          | 35     | >99:1    |
| 11                | DIPEA instead of Cs <sub>2</sub> CO <sub>3</sub>                          | 11     | 99:1     |
| 12                | Et <sub>3</sub> N instead of Cs <sub>2</sub> CO <sub>3</sub>              | 18     | >99:1    |
| 13 <sup>c</sup>   | PhCF <sub>3</sub> instead of toluene                                      | 40     | 97:3     |
| 14 <sup>c</sup>   | THF instead of toluene                                                    | 39     | 93:7     |
| 15 <sup>c</sup>   | DCM instead of toluene                                                    | 33     | 95:5     |
| 16 <sup>c</sup>   | PhCl instead of toluene                                                   | 49     | 95:5     |
| 17 <sup>c</sup>   | <i>tert</i> -BuPh instead of toluene                                      | 37     | 98.5:1.5 |
| 18 <sup>c</sup>   | DMSO instead of toluene                                                   | 47     | 92:8     |
| 19 <sup>c</sup>   | 1,4-Dioxane instead of toluene                                            | 34     | 98:2     |
| 20 <sup>c</sup>   | CHCl <sub>3</sub> instead of toluene                                      | 19     | 98:2     |
| 21 <sup>c</sup>   | DME instead of toluene                                                    | 34     | 94:6     |
| 22 <sup>c</sup>   | DMF instead of toluene                                                    | 27     | 94:6     |
| 23 <sup>c</sup>   | DMA instead of toluene                                                    | 15     | 91:9     |
| 24 <sup>c</sup>   | DCE instead of toluene                                                    | 35     | 87:13    |
| 25 <sup>c</sup>   | <i>o</i> -xylene instead of toluene                                       | 31     | 99:1     |
| 26 <sup>c</sup>   | Mesitylene instead of toluene                                             | 32     | 99:1     |
| 27 <sup>c</sup>   | PhCN instead of toluene                                                   | 33     | 82:18    |
| 28 <sup>c</sup>   | PhNO <sub>2</sub> instead of toluene                                      | 45     | 72:28    |
| 29 <sup>c</sup>   | <i>toluene:benzene (4:1) instead of toluene</i>                           | 67(65) | >99:1    |
| 30 <sup>c</sup>   | <i>toluene:benzene (9:1) instead of toluene</i>                           | 48     | >99:1    |
| 31 <sup>c,d</sup> | LiOAc instead of LiCl                                                     | 35     | 99:1     |
| 32 <sup>c,d</sup> | Thiourea instead of LiCl                                                  | <5     | -        |
| 33 <sup>c,d</sup> | Sc(OTf) <sub>3</sub> (20 mol %) instead of LiCl                           | <5     | -        |
| 34 <sup>c,d</sup> | 15 mol % <b>4</b> is used                                                 | 59     | 99:1     |
| 35 <sup>c,d</sup> | 20 mol % <b>4</b> is used                                                 | 60     | 99:1     |
| 36 <sup>c,d</sup> | 3.0 equiv <b>2a</b> used                                                  | 61     | 99:1     |
| 37 <sup>c,d</sup> | Reaction stirred for 36 h                                                 | 41     | 99:1     |

<sup>a</sup> Standard conditions: **1a** (0.1 mmol), **2a** (0.2 mmol), **4** (10 mol %), **8** (2.0 equiv), Cs<sub>2</sub>CO<sub>3</sub> (1.5 equiv), LiCl (1.0 equiv), toluene (0.1 M), 25 °C, 12 h, <sup>b</sup>The yields were determined by <sup>1</sup>H-NMR analysis of crude reaction mixture using dibromomethane as the internal standard. <sup>c</sup> DMAP is used as a base. <sup>d</sup> toluene:benzene is used as a solvent.

### 3. General Procedure for the Enantioselective Synthesis of Cyclopentane-fused Quinoline-2-one Derivatives

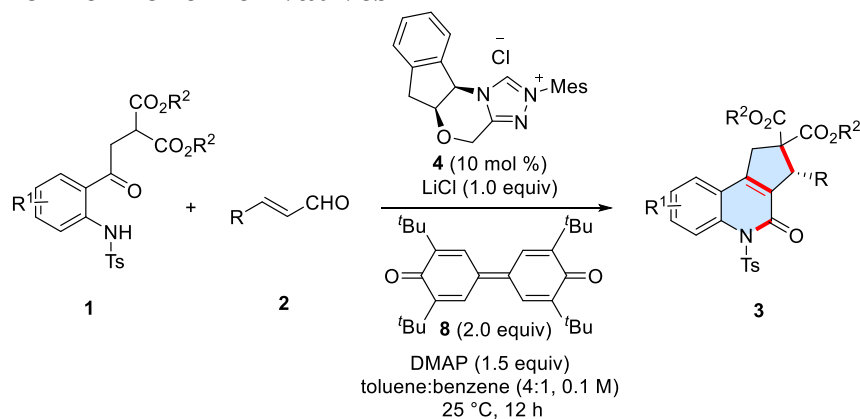



To an oven dried Schlenk tube equipped with a magnetic stir bar, LiCl (8.5 mg, 0.2 mmol) was taken from glove box then the triazolium salt **4** (7.4 mg, 0.04 mmol), dimethyl malonate derivatives **1** (0.2 mmol) and bisquinone oxidant **8** (0.4 mmol) were added to it. To this mixture, of solvent toluene:benzene (4:1 ratio, 2.0 mL) was added under nitrogen atmosphere and kept at 25 °C. Then cinnamaldehyde **2** (0.4 mmol) followed by DMAP (36.7 mg, 0.3 mmol) were added to the reaction mixture and kept for stirring at 25 °C for 12 h. After the reaction is complete (monitored by TLC), the solvent was evaporated, and the crude residue was purified by flash column chromatography on neutral alumina to afford the corresponding cyclopentane-fused quinoline-2-one derivative. All the racemic compounds were synthesized using *N*-phenyl triazolium-derived carbene (10 mol %) following the below Scheme.

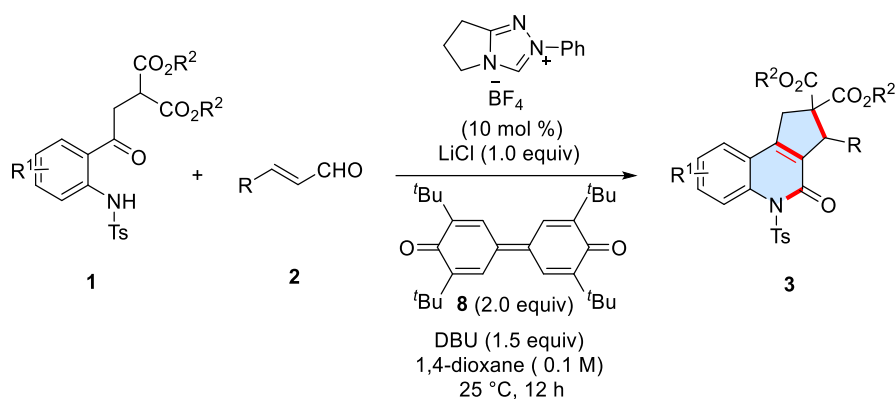

### Procedure for the 1 mmol scale experiment

To an oven dried Schlenk tube equipped with a magnetic stir bar, LiCl (42.4 mg, 1.0 mmol) was taken from glove box then the triazolium salt **4** (36.8 mg, 0.1 mmol), dimethyl 2-(2-(2-((4-methylphenyl)sulfonamido)phenyl)-2-oxoethyl)malonate **1a** (419.5 mg, 1.0 mmol) and bisquinone oxidant **8** (0.2 mmol) were added to it. To this mixture, solvent toluene:benzene (4:1 ratio, 10.0 mL) was added under nitrogen atmosphere and kept at 25 °C. Then cinnamaldehyde **2a** (0.25 mL, 2.0 mmol) and followed by DMAP (183.2 mg, 1.5 mmol) were added to the reaction mixture and kept for stirring at 25 °C for 12 h. After the reaction is complete (monitored by TLC), the solvent was evaporated, and the crude residue was purified by flash column chromatography on neutral alumina to afford the dimethyl (*R*)-4-oxo-3-phenyl-5-tosyl-1,3,4,5-tetrahydro-2*H*-cyclopenta[*c*]quinoline-2,2-dicarboxylate **3a** as a white solid (340.2 mg, 64% yield).

#### 4. X-ray Data of **3v**

Single crystals of **3v** (recrystallized from 1:4 *n*-hexane / CDCl<sub>3</sub> at 25 °C) was mounted and the diffraction data was collected at 120 K on a Bruker Smart APEX-II Ultra CCD diffractometer using SMART/SAINT software. Intensity data were collected using graphite monochromatized Mo-K $\alpha$  radiation (71.073 pm). The single crystal was affixed to a Hampton Research cryoloop using Paratone-N oil. Data collection and reduction was performed using Bruker APEX2 and Bruker SAINT, respectively. The structure was solved by direct methods using the SHELX-97 and refined by full-matrix leastsquares on F<sup>2</sup>. Empirical absorption corrections were applied with SADABS. All non-hydrogen atoms were refined anisotropically and hydrogen atoms were included in geometric positions. Structure was drawn using Olex-2 and Mercury-3. CCDC 2323442 (**3v**) contains the supplementary crystallographic data for this paper. These data can be obtained free of charge from Data Centre via [www.ccdc.cam.ac.uk/data\\_request/cif](http://www.ccdc.cam.ac.uk/data_request/cif). The crystallographic refinement parameters are given below:

##### Crystal data and structure refinement for **3v**.

|                                        |                                                               |
|----------------------------------------|---------------------------------------------------------------|
| CCDC                                   | CCDC 2323442                                                  |
| Identification code                    | <b>3v</b>                                                     |
| Empirical formula                      | C <sub>41</sub> H <sub>33</sub> NO <sub>7</sub> S             |
| Formula weight                         | 683.74                                                        |
| Temperature/K                          | 120(2)                                                        |
| Crystal system                         | monoclinic                                                    |
| Space group                            | P2 <sub>1</sub>                                               |
| <i>a</i> /Å                            | 9.1592(3)                                                     |
| <i>b</i> /Å                            | 17.6405(5)                                                    |
| <i>c</i> /Å                            | 10.2784(3)                                                    |
| $\alpha$ /°                            | 90                                                            |
| $\beta$ /°                             | 94.1920(10)                                                   |
| $\gamma$ /°                            | 90                                                            |
| Volume/Å <sup>3</sup>                  | 1656.27(9)                                                    |
| <i>Z</i>                               | 2                                                             |
| $\rho_{\text{calc}}$ /cm <sup>3</sup>  | 1.371                                                         |
| $\mu$ /mm <sup>-1</sup>                | 0.154                                                         |
| F(000)                                 | 716.0                                                         |
| Crystal size/mm <sup>3</sup>           | 0.30 × 0.27 × 0.25                                            |
| Radiation                              | MoK $\alpha$ ( $\lambda$ = 0.71073)                           |
| 2 $\Theta$ range for data collection/° | 3.974 to 50.28                                                |
| Index ranges                           | -10 ≤ <i>h</i> ≤ 10, -21 ≤ <i>k</i> ≤ 21, -12 ≤ <i>l</i> ≤ 12 |
| Reflections collected                  | 48772                                                         |

|                                                |                                                                |
|------------------------------------------------|----------------------------------------------------------------|
| Independent reflections                        | 5903 [ $R_{\text{int}}= 0.0703$ , $R_{\text{sigma}}= 0.0439$ ] |
| Data/restraints/parameters                     | 5903/1/452                                                     |
| Goodness-of-fit on $F^2$                       | 1.042                                                          |
| Final R indexes [ $I \geq 2\sigma(I)$ ]        | $R_1= 0.0354$ , $wR_2= 0.0741$                                 |
| Final R indexes [all data]                     | $R_1= 0.0501$ , $wR_2= 0.0803$                                 |
| Largest diff. peak/hole / $e \text{ \AA}^{-3}$ | 0.17/-0.28                                                     |
| Flack parameter                                | -0.07(4)                                                       |

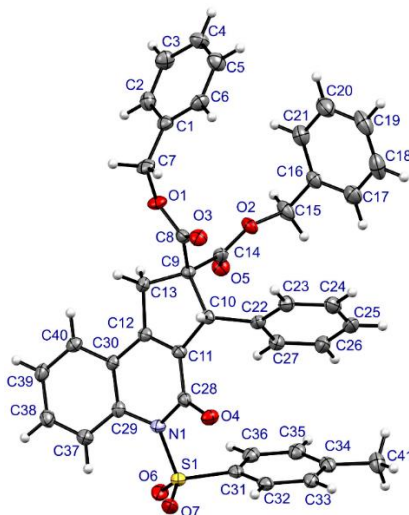

Fig. S1: ORTEP Diagram of **3v** (thermal ellipsoids at 50% probability)

## 5. Linear Effect Study<sup>4</sup>

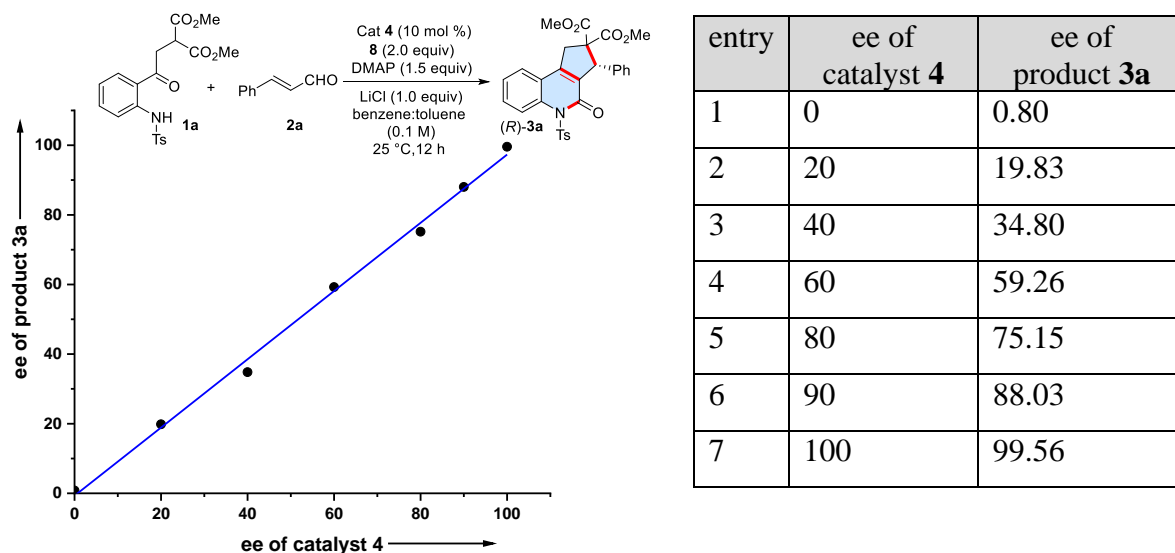

Fig. S2: Linear effects with respect to the product ee and the catalyst ee values

<sup>4</sup> (a) D. Guillaneux, S. H. Zhao, O. Samuel, D. Rainford and H. B. Kagan, *J. Am. Chem. Soc.*, 1994, **116**, 9430; (b) T. Satyanarayana, S. Abraham and H. B. Kagan, *Angew. Chem., Int. Ed.*, 2009, **48**, 456.

To gain insight into the role of the NHC catalyst in stereo-determining step of the cascade process, we conducted the reaction of **1a** and **2a** using varying enantiomeric excess (ee) values of the triazolium salt **4**. The alteration in the ee values of product **3a** with the change in ee values of catalyst **4** showed a linear correlation (Fig. S2) The identification of the linear effect suggests that a single catalyst is involved in stereo-determining transition state of this reaction. Obviously, the NHC is involved in the formation of  $\alpha,\beta$ -unsaturated acylazoliums under oxidative conditions and that is the key intermediate for this reaction.

## 6. Synthesis and Characterization of 2'-Aminomalonate Derivatives

### General Procedure for the Synthesis of 2'-Aminomalonate Derivatives **1**

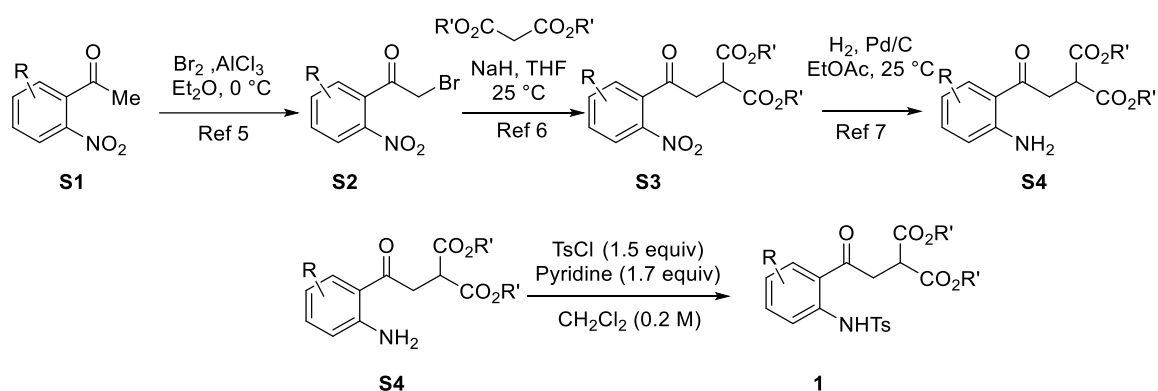

2-Bromo-1-(2-nitrophenyl)ethan-1-one derivative (**S2**) was prepared following the modified literature procedure by reaction of 1-(2-nitrophenyl)ethan-1-one derivatives (**S1**) with  $\text{Br}_2$  and catalytic amount of  $\text{AlCl}_3$  in diethyl ether as a solvent.<sup>5</sup> Then dialkyl 2-(2-(2-nitrophenyl)-2-oxoethyl)malonate derivative (**S3**) was prepared following the literature procedure using malonate derivatives and  $\text{NaH}$  in THF medium.<sup>6</sup> After that, reduction of  $-\text{NO}_2$  was done using  $\text{H}_2$ ,  $\text{Pd/C}$  to get dialkyl 2-(2-(2-aminophenyl)-2-oxoethyl)malonate derivatives (**S4**).<sup>7</sup> The dialkyl 2-(2-(2-aminophenyl)-2-oxoethyl)malonate (1.00 equiv) was dissolved in  $\text{CH}_2\text{Cl}_2$  and mixed with tosyl chloride (1.5 equiv) and pyridine (1.7 equiv) at  $0\text{ }^\circ\text{C}$  and then stirred at  $25\text{ }^\circ\text{C}$  for 12 h before quenched with  $\text{H}_2\text{O}$ . The resulting mixture was extracted with  $\text{CH}_2\text{Cl}_2$ . The combined organic extracts were dried over anhydrous sodium sulfate, filtered, and concentrated. The residue was purified by flash column chromatography to afford the corresponding 2'-aminomalonate derivatives **1**.

<sup>5</sup> W. Wierenga, A. W. Harrison, B. R. Evans and C. G. Chidester, *J. Org. Chem.*, 1984, **49**, 438.

<sup>6</sup> V. Sriramurthy and O. Kwon, *Org. Lett.*, 2010, **12**, 1084.

<sup>7</sup> G. Kang, M. Yamagami, S. Vellalath and D. Romo, *Angew. Chem. Int. Ed.*, 2018, **57**, 6527.

### Dimethyl 2-(2-(2-((4-methylphenyl)sulfonamido)phenyl)-2-oxoethyl)malonate Dimethyl

(1a)

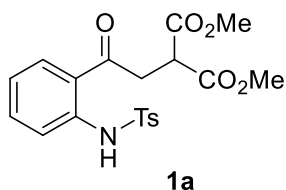

Following the general procedure, dimethyl 2-(2-(2-aminophenyl)-2-oxoethyl)malonate (1.6 g, 6.0 mmol) was dissolved in CH<sub>2</sub>Cl<sub>2</sub> (0.25 M) under nitrogen atmosphere and mixed with tosyl chloride (1.7 g, 9.0 mmol) and pyridine (10 mL) at 0 °C and then stirred at 25 °C for 12 h before quenched with H<sub>2</sub>O. The resulting mixture was extracted with CH<sub>2</sub>Cl<sub>2</sub>. The combined organic extracts were dried over anhydrous sodium sulfate, filtered, and concentrated. The residue was purified by flash column chromatography (Pet. Ether/EtOAc-80/20) to afford the corresponding dimethyl 2-(2-(2-((4-methylphenyl) sulfonamido)phenyl)-2-oxoethyl)malonate **1a** as an orange solid (1.9 g, 76% yield).

*R<sub>f</sub>* (Pet. ether /EtOAc = 70/30): 0.25; **<sup>1</sup>H NMR (400 MHz, CDCl<sub>3</sub>)** δ 11.15 (s, 1H), 7.85 (d, *J* = 7.9 Hz, 1H), 7.70-7.64 (m, 3H), 7.45 (t, *J* = 7.7 Hz, 1H), 7.22 (d, *J* = 7.9 Hz, 2H), 7.06 (t, *J* = 7.6 Hz, 1H), 3.97 (d, *J* = 6.8 Hz, 1H), 3.79 (s, 6H), 3.58 (d, *J* = 7.0 Hz, 2H), 2.36 (s, 3H). **<sup>13</sup>C NMR (100 MHz, CDCl<sub>3</sub>)** δ 200.3, 169.3, 144.1, 140.2, 136.4, 135.4, 131.1, 129.8, 127.4, 122.8, 121.5, 119.2, 53.1, 46.7, 38.9, 21.6. **HRMS (ESI)** *m/z*: [M+H]<sup>+</sup> Calcd for C<sub>20</sub>H<sub>22</sub>NO<sub>7</sub>S: 420.1111; Found: 420.1128. **FTIR (cm<sup>-1</sup>)** 3030, 2955, 1733, 1651, 1494, 1155, 1089, 911, 752.

### Diethyl 2-(2-(2-((4-methylphenyl)sulfonamido)phenyl)-2-oxoethyl)malonate (1t)

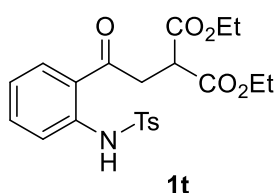

Following the general procedure, diethyl 2-(2-(2-aminophenyl)-2-oxoethyl)malonate (1.3 g, 5.0 mmol) was dissolved in CH<sub>2</sub>Cl<sub>2</sub> (0.25 M) under nitrogen atmosphere and mixed with tosyl chloride (1.4 g, 7.5 mmol) and pyridine (8.3 mL) at 0 °C and then stirred at 25 °C for 12 h before quenched with H<sub>2</sub>O. The resulting mixture was extracted with CH<sub>2</sub>Cl<sub>2</sub>. The combined organic extracts were dried over anhydrous sodium sulfate, filtered, and concentrated. The residue was purified by flash column chromatography (Pet. Ether/EtOAc-80/20) to afford the corresponding diethyl 2-(2-(2-((4-methylphenyl)sulfonamido)phenyl)-2-oxoethyl)malonate **1t** as a white solid (1.2 g, 55% yield).

*R<sub>f</sub>* (Pet. ether /EtOAc = 70/30): 0.28; **<sup>1</sup>H NMR (400 MHz, CDCl<sub>3</sub>)** δ 11.17 (s, 1H), 7.85 (d, *J* = 8.1 Hz, 1H), 7.69-7.64 (m, 3H), 7.44 (t, *J* = 7.9 Hz, 1H), 7.21 (d, *J* = 7.9 Hz, 2H), 7.05 (t, *J* = 7.6 Hz, 1H), 4.29-4.18 (m, 4H), 3.93 (t, *J* = 7.0 Hz, 1H), 3.55 (d, *J* = 7.1 Hz, 2H), 2.34 (s, 3H), 1.29 (t, *J* = 7.1 Hz, 6H). **<sup>13</sup>C NMR (100 MHz, CDCl<sub>3</sub>)** δ 200.5, 168.8, 144.1, 140.1, 136.4, 135.3, 131.1, 129.8, 127.3, 122.8, 121.5, 119.2, 62.0, 47.1, 38.8, 21.6, 14.1. **HRMS (ESI)** *m/z*: [M+H]<sup>+</sup>

Calcd for C<sub>22</sub>H<sub>26</sub>NO<sub>7</sub>S: 448.1424; Found: 448.1439. **FTIR** (cm<sup>-1</sup>) 3167, 2983, 1728, 1651, 1602, 1494, 1156, 914, 752.

### Diisopropyl 2-(2-(2-((4-methylphenyl)sulfonamido)phenyl)-2-oxoethyl)malonate (**1u**)

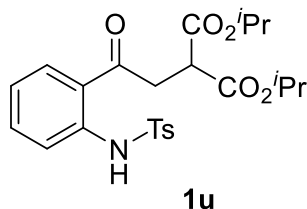

Following the general procedure, diisopropyl 2-(2-(2-aminophenyl)-2-oxoethyl)malonate (0.61 g, 1.9 mmol) was dissolved in CH<sub>2</sub>Cl<sub>2</sub> (0.25 M) under nitrogen atmosphere and mixed with tosyl chloride (0.5 g, 2.85 mmol) and pyridine (3.1 mL) at 0 °C and then stirred at 25 °C for 12 h before quenched with H<sub>2</sub>O. The resulting mixture was extracted with CH<sub>2</sub>Cl<sub>2</sub>. The combined organic extracts were dried over anhydrous sodium sulfate, filtered, and concentrated. The residue was purified by flash column chromatography (Pet. Ether/EtOAc-80/20) to afford the corresponding diisopropyl 2-(2-(2-((4-methylphenyl)sulfonamido)phenyl)-2-oxoethyl)malonate **1u** as a white solid (0.16 g, 18% yield).

**R<sub>f</sub>** (Pet. ether /EtOAc = 70/30): 0.2; **<sup>1</sup>H NMR** (400 MHz, CDCl<sub>3</sub>) δ 11.19 (s, 1H), 7.87 (d, *J* = 9.1 Hz, 1H), 7.70-7.65 (m, 3H), 7.45 (t, *J* = 8.3 Hz, 1H), 7.22 (d, *J* = 4.7 Hz, 2H), 7.06 (t, *J* = 7.6 Hz, 1H), 5.1-5.04 (m, 2H), 3.88 (t, *J* = 6.8 Hz, 1H), 3.53 (d, *J* = 6.9 Hz, 2H), 2.36 (s, 3H), 1.31-1.25 (m, 12H). **<sup>13</sup>C NMR** (101 MHz, CDCl<sub>3</sub>) δ 200.6, 168.5, 144.1, 140.2, 136.5, 135.3, 131.1, 129.8, 127.4, 122.8, 121.7, 119.3, 69.6, 47.5, 38.7, 21.8, 21.69, 21.66. **HRMS (ESI)** m/z: [M+H]<sup>+</sup> Calcd for C<sub>24</sub>H<sub>30</sub>NO<sub>7</sub>S: 476.1737; Found: 476.1727. **FTIR** (cm<sup>-1</sup>) 3029, 2982, 2933, 1723, 1681, 1451, 1261, 1169, 748.

### Dibenzyl 2-(2-(2-((4-methylphenyl)sulfonamido)phenyl)-2-oxoethyl)malonate (**1v**)

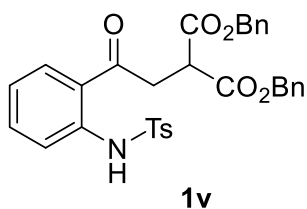

Following the general procedure, dibenzyl 2-(2-(2-aminophenyl)-2-oxoethyl)malonate (1.2 g, 2.8 mmol) was dissolved in CH<sub>2</sub>Cl<sub>2</sub> (0.25 M) under nitrogen atmosphere and mixed with tosyl chloride (0.8 g, 4.2 mmol) and pyridine (4.6 mL) at 0 °C and then stirred at 25 °C for 12 h before quenched with H<sub>2</sub>O. The resulting mixture was extracted with CH<sub>2</sub>Cl<sub>2</sub>. The combined organic extracts were dried over anhydrous sodium sulfate, filtered, and concentrated. The residue was purified by flash column chromatography (Pet. Ether/EtOAc-80/20) to afford the corresponding dibenzyl 2-(2-(2-((4-methylphenyl)sulfonamido)phenyl)-2-oxoethyl)malonate **1v** as a pale yellow solid (0.3 g, 30% yield).

$R_f$  (Pet. ether /EtOAc = 70/30): 0.25;  $^1\text{H NMR}$  (400 MHz,  $\text{CDCl}_3$ )  $\delta$  11.22 (s, 1H), 7.83 (d,  $J$  = 7.94 Hz, 1H), 7.71-7.68 (m, 3H), 7.45 (t,  $J$  = 7.8 Hz, 1H), 7.35 – 7.29 (m, 10H), 7.21 (d,  $J$  = 8.3 Hz, 2H), 7.05 (t,  $J$  = 7.6 Hz, 1H), 5.22 (s, 4H), 4.11 (t,  $J$  = 7.06 Hz, 1H), 3.62 (d,  $J$  = 7.1 Hz, 2H), 2.34 (s, 3H).  $^{13}\text{C NMR}$  (100 MHz,  $\text{CDCl}_3$ )  $\delta$  200.3, 168.5, 144.0, 140.1, 136.3, 135.3, 135.1, 131.1, 129.7, 128.6, 128.5, 128.2, 127.3, 122.7, 121.3, 119.1, 67.6, 47.0, 38.7, 21.5. **HRMS (ESI)**  $m/z$ :  $[\text{M}+\text{H}]^+$  Calcd for  $\text{C}_{32}\text{H}_{30}\text{NO}_7\text{S}$ : 572.1737; Found: 572.1762. **FTIR** ( $\text{cm}^{-1}$ ) 3032, 2925, 1731, 1650, 1494, 1334, 1156, 910, 748.

### Diallyl 2-(2-(2-((4-methylphenyl)sulfonamido)phenyl)-2-oxoethyl)malonate (1w)

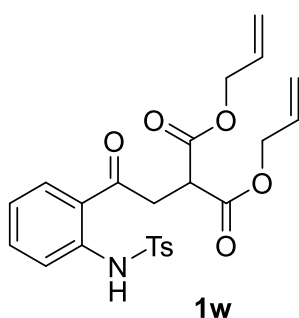

Following the general procedure, diallyl 2-(2-(2-aminophenyl)-2-oxoethyl)malonate (0.57 g, 1.8 mmol) was dissolved in  $\text{CH}_2\text{Cl}_2$  (0.25 M) under nitrogen atmosphere and mixed with tosyl chloride (0.5 g, 2.7 mmol) and pyridine (3 mL) at 0 °C and then stirred at 25 °C for 12 h before quenched with  $\text{H}_2\text{O}$ . The resulting mixture was extracted with  $\text{CH}_2\text{Cl}_2$ . The combined organic extracts were dried over anhydrous sodium sulfate, filtered, and concentrated. The residue was purified by flash column chromatography (Pet. Ether/EtOAc-80/20) to afford the corresponding diallyl 2-(2-(2-((4-methylphenyl) sulfonamido)phenyl)-2-oxoethyl)malonate **1w** as a white solid ( 0.45 g, 53 % yield).

$R_f$  (Pet. ether /EtOAc = 70/30): 0.25;  $^1\text{H NMR}$  (400 MHz,  $\text{CDCl}_3$ )  $\delta$  11.15 (s, 1H), 7.85 (d,  $J$  = 8.0 Hz, 1H), 7.70-7.65 (m, 3H), 7.45 (t,  $J$  = 7.9 Hz, 1H), 7.22 (d,  $J$  = 8.0 Hz, 2H), 7.06 (t,  $J$  = 7.6 Hz, 1H), 5.97-5.87 (m, 2H), 5.39-5.26 (m, 4H), 4.69 (d,  $J$  = 5.5 Hz, 4H), 4.03 (t,  $J$  = 7.0 Hz, 1H), 3.59 (d,  $J$  = 7.0 Hz, 2H), 2.35 (s, 3H).  $^{13}\text{C NMR}$  (100 MHz,  $\text{CDCl}_3$ )  $\delta$  200.3, 168.4, 144.1, 140.2, 136.4, 135.4, 131.4, 131.1, 129.8, 127.4, 122.8, 121.5, 119.3, 119.0, 66.6, 47.0, 38.8, 21.6. **HRMS (ESI)**  $m/z$ :  $[\text{M}+\text{Na}]^+$  Calcd for  $\text{C}_{24}\text{H}_{25}\text{NO}_2\text{SNa}$ : 494.1244; Found: 494.1245. **FTIR** ( $\text{cm}^{-1}$ ) 3130, 2949, 1732, 1650, 1494, 1210, 1156, 914, 757.

### Dimethyl 2-(2-(2-((4-nitrophenyl)sulfonamido)phenyl)-2-oxoethyl)malonate (1x)

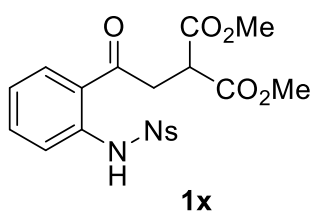

Following the general procedure, dimethyl 2-(2-(2-aminophenyl)-2-oxoethyl)malonate (0.4 g, 1.5 mmol) was dissolved in  $\text{CH}_2\text{Cl}_2$  (0.25 M) under nitrogen atmosphere and mixed with nosyl chloride (0.5 g, 2.25 mmol) and pyridine (0.2 mL) at 0 °C and then stirred at 25 °C for 12 h before quenched with  $\text{H}_2\text{O}$ . The resulting mixture was extracted

with CH<sub>2</sub>Cl<sub>2</sub>. The combined organic extracts were dried over anhydrous sodium sulfate, filtered, and concentrated. The residue was purified by flash column chromatography (Pet. Ether/EtOAc-80/20) to afford the corresponding Dimethyl 2-(2-(2-((4-nitrophenyl)sulfonamido)phenyl)-2-oxoethyl)malonate **1x** as a white solid (0.2 g, 29% yield).

*R<sub>f</sub>* (Pet. ether /EtOAc = 70/30): 0.28; **<sup>1</sup>H NMR (400 MHz, CDCl<sub>3</sub>)** δ 11.30 (s, 1H), 8.28 (d, *J* = 8.4 Hz, 2H), 7.97 (d, *J* = 8.4 Hz, 2H), 7.90 (d, *J* = 8.0 Hz, 1H), 7.73 (d, *J* = 8.4 Hz, 1H), 7.52 (t, *J* = 7.8 Hz, 1H), 7.16 (t, *J* = 7.6 Hz, 1H), 3.98 (t, *J* = 6.9 Hz, 1H), 3.80 (s, 6H), 3.59 (d, *J* = 7.0 Hz, 2H). **<sup>13</sup>C NMR (100 MHz, CDCl<sub>3</sub>)** δ 200.8, 169.1, 150.4, 145.0, 139.2, 135.7, 131.4, 128.6, 124.6, 124.0, 122.1, 119.8, 53.2, 46.6, 38.9. **HRMS (ESI)** *m/z*: [M+Na]<sup>+</sup> Calcd for C<sub>19</sub>H<sub>18</sub>N<sub>2</sub>O<sub>8</sub>SNa: 473.0625; Found: 473.0628. **FTIR (cm<sup>-1</sup>)** 3109, 2956, 2365, 1735, 1578, 1349, 1164, 1090, 759.

#### Dimethyl 2-(2-(2-(methylsulfonamido)phenyl)-2-oxoethyl)malonate (**1y**)

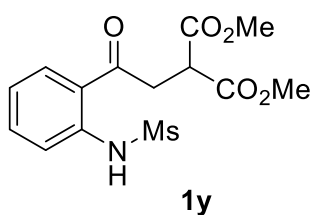

Following the general procedure, dimethyl 2-(2-(2-aminophenyl)-2-oxoethyl)malonate (0.19 g, 0.72 mmol) was dissolved in CH<sub>2</sub>Cl<sub>2</sub> (0.25 M) under nitrogen atmosphere and mixed with mesyl chloride (0.17 g, 1.1 mmol) and pyridine (1.2 mL) at 0 °C and then stirred at 25 °C for 12 h before quenched with H<sub>2</sub>O. The resulting mixture was extracted

with CH<sub>2</sub>Cl<sub>2</sub>. The combined organic extracts were dried over anhydrous sodium sulfate, filtered, and concentrated. The residue was purified by flash column chromatography (Pet. Ether/EtOAc-80/20) to afford the corresponding dimethyl 2-(2-(2-(methylsulfonamido)phenyl)-2-oxoethyl)malonate **1y** as an orange solid (0.2 g, 81% yield).

*R<sub>f</sub>* (Pet. ether /EtOAc = 70/30): 0.2; **<sup>1</sup>H NMR (400 MHz, CDCl<sub>3</sub>)** δ 10.97 (s, 1H), 7.99 (d, *J* = 8.0 Hz, 1H), 7.76 (d, *J* = 8.4 Hz, 1H), 7.59 (t, *J* = 7.8 Hz, 1H), 7.18 (t, *J* = 7.6 Hz, 1H), 4.03 (t, *J* = 7.1 Hz, 1H), 3.80 (s, 6H), 3.70 (d, *J* = 7.1 Hz, 2H), 3.05 (s, 3H). **<sup>13</sup>C NMR (100 MHz, CDCl<sub>3</sub>)** δ 200.4, 169.2, 140.5, 135.8, 131.5, 122.8, 121.1, 118.3, 53.1, 46.7, 40.2, 38.9. **HRMS (ESI)** *m/z*: [M+H]<sup>+</sup> Calcd for C<sub>14</sub>H<sub>18</sub>NO<sub>7</sub>S: 344.0798; Found: 344.0803. **FTIR (cm<sup>-1</sup>)** 3127, 3021, 2929, 1729, 1649, 1494, 1331, 1148, 910.

#### Dimethyl 2-(2-(6-((4-methylphenyl)sulfonamido)benzo[*d*][1,3]dioxol-5-yl)-2-oxoethyl)malonate (**1z**)

Following the general procedure, dimethyl 2-(2-(6-aminobenzo[*d*][1,3]dioxol-5-yl)-2-oxoethyl)malonate (0.7 g, 2.3 mmol) was dissolved in CH<sub>2</sub>Cl<sub>2</sub> (0.25 M) under nitrogen



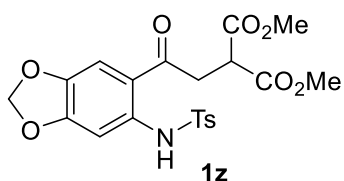

atmosphere and mixed with tosyl chloride (0.66 g, 3.5 mmol) and pyridine (3.9 mL) at 0 °C and then stirred at 25 °C for 12 h before quenched with H<sub>2</sub>O. The resulting mixture was extracted with CH<sub>2</sub>Cl<sub>2</sub>. The combined organic extracts were dried over anhydrous sodium sulfate, filtered, and concentrated. The residue was purified by flash column chromatography (Pet. Ether/EtOAc-60/40) to afford the corresponding Dimethyl 2-(2-(6-(1,3-dioxol-5-yl)-2-oxoethyl)malonate)benzo[d][1,3]dioxol-5-yl)-2-oxoethylmalonate **1z** as a white solid (1.1 g, 99% yield).

**R<sub>f</sub>**(Pet. ether /EtOAc = 70/30): 0.18; **<sup>1</sup>H NMR (400 MHz, CDCl<sub>3</sub>)** δ 11.48 (s, 1H), 7.63 (d, *J* = 8.2 Hz, 2H), 7.23-7.17 (m, 4H), 5.98 (s, 2H), 3.93 (t, *J* = 7.3 Hz, 1H), 3.77 (s, 6H), 3.42 (d, *J* = 7.3 Hz, 2H), 2.35 (s, 3H). **<sup>13</sup>C NMR (100 MHz, CDCl<sub>3</sub>)** δ 198.1, 169.3, 153.3, 144.1, 143.4, 138.3, 136.2, 129.8, 127.3, 115.2, 108.8, 102.5, 100.6, 53.1, 46.7, 38.8, 21.6. **HRMS (ESI) m/z:** [M+H]<sup>+</sup> Calcd for C<sub>21</sub>H<sub>22</sub>NO<sub>9</sub>S: 464.1010; Found: 464.1026. **FTIR (cm<sup>-1</sup>)** 3026, 2955, 1733, 1643, 1607, 1487, 1432, 1348, 1151, 1034, 900, 751.

#### Dimethyl 2-(2-(5-chloro-2-((4-methylphenyl)sulfonamido)phenyl)-2-oxoethyl)malonate (**1aa**)

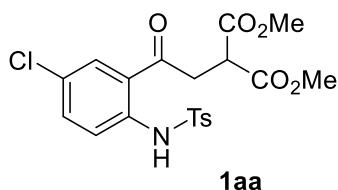

Following the general procedure, dimethyl 2-(2-(2-amino-5-chlorophenyl)-2-oxoethyl)malonate (787 mg, 2.6 mmol) was dissolved in CH<sub>2</sub>Cl<sub>2</sub> (0.25 M) under nitrogen atmosphere and mixed with tosyl chloride (0.74 g, 3.9 mmol) and pyridine (4.3 mL) at 0 °C and then stirred at 25 °C for 12 h before quenched with H<sub>2</sub>O. The resulting mixture was extracted with CH<sub>2</sub>Cl<sub>2</sub>. The combined organic extracts were dried over anhydrous sodium sulfate, filtered, and concentrated. The residue was purified by flash column chromatography (Pet. Ether/EtOAc-80/20) to afford the corresponding dimethyl 2-(2-(5-chloro-2-((4-methylphenyl)sulfonamido)phenyl)-2-oxoethyl)malonate **1aa** as a white solid (0.76 g, 64 % yield).

**R<sub>f</sub>**(Pet. ether /EtOAc = 70/30): 0.28; **<sup>1</sup>H NMR (400 MHz, CDCl<sub>3</sub>)** δ 10.96 (s, 1H), 7.80 (d, *J* = 2.2 Hz, 1H), 7.66 (t, *J* = 8.6 Hz, 3H), 7.43-7.40 (m, 1H), 7.24 (d, *J* = 8.2 Hz, 2H), 3.96 (t, *J* = 7.0 Hz, 1H), 3.80 (s, 6H), 3.53 (d, *J* = 7.0 Hz, 2H), 2.37 (s, 3H). **<sup>13</sup>C NMR (100 MHz, CDCl<sub>3</sub>)** δ 199.5, 169.0, 144.4, 138.7, 136.1, 135.2, 130.6, 129.9, 128.2, 127.3, 122.6, 120.9, 53.2, 46.6, 38.9, 21.7. **HRMS (ESI) m/z:** [M+H]<sup>+</sup> Calcd for C<sub>20</sub>H<sub>21</sub>ClNO<sub>7</sub>S: 454.0722; Found: 454.0736. **FTIR (cm<sup>-1</sup>)** 3120, 2954, 1733, 1656, 1485, 1335, 1159, 1089, 910.

**Dimethyl 2-(2-(5-methyl-2-((4-methylphenyl)sulfonamido)phenyl)-2-oxoethyl)malonate (1ab)**

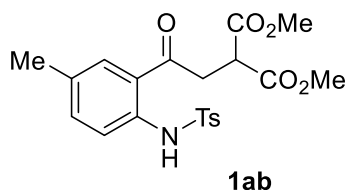

Following the general procedure, dimethyl 2-(2-(2-amino-5-methylphenyl)-2-oxoethyl)malonate (0.63 mg, 2.3 mmol) was dissolved in CH<sub>2</sub>Cl<sub>2</sub> (0.25 M) under nitrogen atmosphere and mixed with tosyl chloride (0.67 g, 3.5 mmol) and pyridine (3.8 mL) at 0 °C and then stirred at 25 °C for 12 h before quenched with H<sub>2</sub>O. The resulting mixture was extracted with CH<sub>2</sub>Cl<sub>2</sub>. The combined organic extracts were dried over anhydrous sodium sulfate, filtered, and concentrated. The residue was purified by flash column chromatography (Pet. Ether/EtOAc-80/20) to afford the corresponding dimethyl 2-(2-(5-methyl-2-((4-methylphenyl)sulfonamido)phenyl)-2-oxoethyl)malonate **1ab** as a white solid (0.67 g, 67 % yield).

*R<sub>f</sub>* (Pet. ether /EtOAc = 70/30): 0.21; <sup>1</sup>H NMR (400 MHz, CDCl<sub>3</sub>) δ 10.92 (s, 1H), 7.66 (d, *J* = 7.9 Hz, 2H), 7.62 (s, 1H), 7.57 (d, *J* = 8.5 Hz, 1H), 7.28-7.26 (m, 1H), 7.21 (d, *J* = 8.0 Hz, 2H), 3.95 (t, *J* = 7.0 Hz, 1H), 3.80 (s, 6H), 3.54 (d, *J* = 7.0 Hz, 2H), 2.35 (s, 3H), 2.30 (s, 3H). <sup>13</sup>C NMR (100 MHz, CDCl<sub>3</sub>) δ 200.3, 169.3, 144.0, 137.6, 136.5, 136.2, 132.7, 131.2, 129.8, 127.4, 121.9, 119.8, 53.1, 46.7, 38.9, 21.6, 20.8. HRMS (ESI) *m/z*: [M+Na]<sup>+</sup> Calcd for C<sub>21</sub>H<sub>23</sub>NO<sub>7</sub>SNa: 456.1093; Found: 456.1098. FTIR (cm<sup>-1</sup>) 3169, 2954, 1733, 1651, 1497, 1336, 1158, 916, 670.

## 7. Synthesis and Characterization of Cyclopentane fused Quinoline-2-one Derivatives

### Dimethyl (*R*)-4-oxo-3-phenyl-5-tosyl-1,3,4,5-tetrahydro-2*H*-cyclopenta[*c*]quinoline-2,2-dicarboxylate (3a)

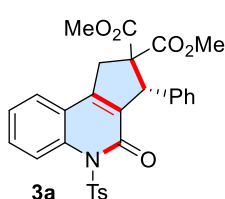

Following the general procedure, LiCl (8.5 mg, 0.2 mmol) was taken from glove box in an oven dried Schlenk tube. Then triazolium salt **4** (7.4 mg, 0.04 mmol), dimethyl 2-(2-(2-((4-methylphenyl)sulfonamido)phenyl)-2-oxoethyl)malonate **1a** (84.0 mg, 0.2 mmol) and bisquinone oxidant **8** (163.4 mg, 0.4 mmol) were added to it. Then mixture of solvent toluene:benzene (4:1 ratio, 2.0 mL) was added under nitrogen atmosphere to it and kept stirring at 25 °C. Then cinnamaldehyde **2a** (52.9 mg, 50.3 μL, 0.4 mmol) and followed by DMAP (36.7 mg, 0.3 mmol) were added to the reaction mixture and kept for stirring at 25 °C for 12 h. Then, the solvent was evaporated, and the crude mixture was purified by flash column chromatography (Pet. Ether/EtOAc- 80/20) using

neutral alumina to afford dimethyl (*R*)-4-oxo-3-phenyl-5-tosyl-1,3,4,5-tetrahydro-2*H*-cyclopenta[*c*]quinoline-2,2-dicarboxylate **3a** as a white solid (69.2mg, 65% yield).

$R_f$  (Pet. ether /EtOAc = 70/30): 0.35; er = >99:1,  $[\alpha]_D^{22} = -74.41$  (c 1.0, CHCl<sub>3</sub>). **HPLC** (Chiralpak IA, hexane/IPA = 70:30, flow rate = 0.7 mL/min,  $\lambda = 254$  nm)  $t_R = 15.7$  min (minor),  $t_R = 17.1$  min (major).

**<sup>1</sup>H NMR (400 MHz, CDCl<sub>3</sub>)**  $\delta$  8.39 (d,  $J = 8.6$  Hz, 1H), 7.86 (d,  $J = 8.2$  Hz, 2H), 7.59-7.55 (m, 2H), 7.38 (t,  $J = 7.5$  Hz, 1H), 7.20 (d,  $J = 8.2$  Hz, 2H), 7.15 – 7.08 (m, 3H), 6.93 – 6.91 (m, 2H), 5.27 (s, 1H), 4.19 (d,  $J = 18.4$  Hz, 1H), 3.77 (s, 3H), 3.55 (d,  $J = 18.5$  Hz, 1H), 3.16 (s, 3H), 2.38 (s, 3H). **<sup>13</sup>C NMR (100 MHz, CDCl<sub>3</sub>)**  $\delta$  171.3, 168.9, 158.9, 150.2, 145.1, 138.3, 136.7, 136.5, 132.8, 130.2, 129.4, 128.8, 128.5, 128.2, 127.5, 125.5, 124.8, 120.2, 119.7, 65.0, 55.6, 53.5, 52.5, 39.3, 21.8. **HRMS (ESI)**  $m/z$ :  $[M+H]^+$  Calcd for C<sub>29</sub>H<sub>26</sub>NO<sub>7</sub>S: 532.1424; Found: 532.1431. **FTIR (cm<sup>-1</sup>)** 2954, 2922, 1733, 1682, 1493, 1447, 1166, 1039, 753, 552.

### Dimethyl (*R*)-3-(4-methoxyphenyl)-4-oxo-5-tosyl-1,3,4,5-tetrahydro-2*H*-cyclopenta[*c*]quinoline-2,2-dicarboxylate (**3b**)

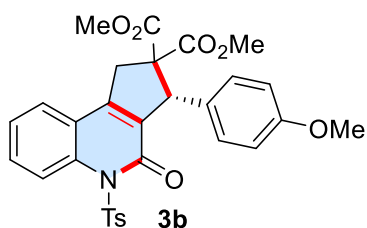

Following the general procedure, LiCl (8.5 mg, 0.2 mmol) was taken from glove box in an oven dried Schlenk tube. Then triazolium salt **4** (7.4 mg, 0.04 mmol), dimethyl 2-(2-(2-((4-methylphenyl)sulfonamido)phenyl)-2-oxoethyl) malonate **1a** (84.0 mg, 0.2 mmol), bisquinone oxidant **8** (163.4 mg, 0.4 mmol) and (*E*)-3-(4-methoxyphenyl)acrylaldehyde **2b** (84.4 mg, 0.4 mmol) were added to it. Then mixture of solvent toluene:benzene (4:1 ratio, 2.0 mL) was added under nitrogen atmosphere to it and kept stirring at 25 °C. Then DMAP (36.7 mg, 0.3 mmol) was added to the reaction mixture and kept for stirring at 25 °C for 12 h. Then, the solvent was evaporated, and the crude mixture was purified by flash column chromatography (Pet. Ether/EtOAc- 80/20) using neutral alumina to afford dimethyl (*R*)-3-(4-methoxyphenyl)-4-oxo-5-tosyl-1,3,4,5-tetrahydro-2*H*-cyclopenta[*c*]quinoline-2,2-dicarboxylate **3b** as a white solid (56.2 mg, 50% yield).

$R_f$  (Pet. ether /EtOAc = 70/30): 0.34; er = 99:1,  $[\alpha]_D^{22} = -35.18$  (c 1.0, CHCl<sub>3</sub>). **HPLC** (Chiralpak IA, hexane/IPA = 70:30, flow rate = 0.7 mL/min,  $\lambda = 254$  nm)  $t_R = 18.1$  min (major),  $t_R = 32.6$  min (minor).

**<sup>1</sup>H NMR (400 MHz, CDCl<sub>3</sub>)**  $\delta$  8.38 (d,  $J = 8.6$  Hz, 1H), 7.88 (d,  $J = 8.3$  Hz, 2H), 7.56 (t,  $J = 8.0$  Hz, 2H), 7.37 (t,  $J = 7.5$  Hz, 1H), 7.22 (d,  $J = 8.2$  Hz, 2H), 6.85 (d,  $J = 8.5$  Hz, 2H), 6.65 (d,  $J = 8.6$  Hz, 2H), 5.23 (s, 1H), 4.20 – 4.15 (m, 1H), 3.76-3.72 (m, 6H), 3.54 (d,  $J = 18.5$  Hz, 1H),

3.22 (s, 3H), 2.38 (s, 3H).  $^{13}\text{C}$  NMR (100 MHz,  $\text{CDCl}_3$ )  $\delta$  171.4, 168.9, 158.9, 149.9, 145.1, 138.3, 136.5, 132.9, 130.1, 129.5, 129.4, 128.7, 128.6, 125.5, 124.7, 120.1, 119.7, 113.6, 64.8, 55.2, 54.8, 53.5, 52.6, 39.1, 21.7. HRMS (ESI)  $m/z$ :  $[\text{M}+\text{H}]^+$  Calcd for  $\text{C}_{30}\text{H}_{28}\text{NO}_8\text{S}$ : 562.1530; Found: 562.1538. FTIR ( $\text{cm}^{-1}$ ) 2956, 2924, 2851, 1732, 1681, 1508, 1252, 1164, 1079, 1030, 752.

**Dimethyl (*R*)-4-oxo-3-(*p*-tolyl)-5-tosyl-1,3,4,5-tetrahydro-2*H*-cyclopenta[*c*]quinoline-2,2-dicarboxylate (3c)**

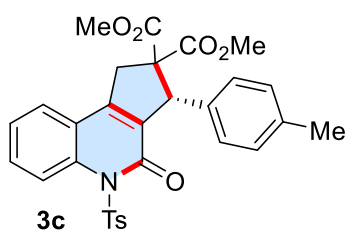

Following the general procedure, LiCl (8.5 mg, 0.2 mmol) was taken from glove box in an oven dried Schlenk tube. Then triazolium salt **4** (7.4 mg, 0.04 mmol), dimethyl 2-(2-(2-((4-methylphenyl)sulfonamido) phenyl)-2-oxoethyl)malonate **1a** (84.0 mg, 0.2 mmol) and bisquinone oxidant **8** (163.4 mg, 0.4 mmol) were added to it. Then mixture of solvent toluene:benzene (4:1 ratio, 2.0 mL) was added under nitrogen atmosphere to it and kept stirring at 25 °C. Then (*E*)-3-(*p*-tolyl)acrylaldehyde **2c** (58.5 mg, 0.4 mmol) and followed by DMAP (36.7 mg, 0.3 mmol) were added to the reaction mixture and kept for stirring at 25 °C for 12 h. Then, the solvent was evaporated, and the crude mixture was purified by flash column chromatography (Pet. Ether/EtOAc- 80/20) using neutral alumina to afford dimethyl (*R*)-4-oxo-3-(*p*-tolyl)-5-tosyl-1,3,4,5-tetrahydro-2*H*-cyclopenta[*c*]quinoline-2,2-dicarboxylate **3c** as a white solid (43 mg, 51% yield).

$R_f$  (Pet. ether /EtOAc = 70/30): 0.32; er = >99:1,  $[\alpha]_{\text{D}}^{22} = -55.20$  (c 1.0,  $\text{CHCl}_3$ ). HPLC (Chiralpak IA, hexane/IPA = 70:30, flow rate = 0.7 mL/min,  $\lambda = 254$  nm)  $t_{\text{R}} = 14.8$  min (major),  $t_{\text{R}} = 16.5$  min (minor).

$^1\text{H}$  NMR (400 MHz,  $\text{CDCl}_3$ )  $\delta$  8.38 (d,  $J = 8.6$  Hz, 1H), 7.88 (d,  $J = 8.0$  Hz, 2H), 7.59-7.55 (m, 2H), 7.38 (t,  $J = 7.5$  Hz, 1H), 7.22 (d,  $J = 8.0$  Hz, 2H), 6.92 (d,  $J = 7.7$  Hz, 2H), 6.80 (d,  $J = 7.6$  Hz, 2H), 5.24 (s, 1H), 4.17 (d,  $J = 18.4$  Hz, 1H), 3.76 (s, 3H), 3.54 (d,  $J = 18.4$  Hz, 1H), 3.20 (s, 3H), 2.39 (s, 3H), 2.24 (s, 3H).  $^{13}\text{C}$  NMR (100 MHz,  $\text{CDCl}_3$ )  $\delta$  171.4, 168.9, 158.9, 150.1, 145.1, 138.3, 137.1, 136.5, 133.5, 132.9, 130.1, 129.5, 128.9, 128.8, 128.3, 125.5, 124.8, 120.2, 119.8, 64.9, 55.2, 53.5, 52.5, 39.2, 21.8, 21.2. HRMS (ESI)  $m/z$ :  $[\text{M}+\text{H}]^+$  Calcd for  $\text{C}_{30}\text{H}_{28}\text{NO}_7\text{S}$ : 546.1581; Found: 546.1608. FTIR ( $\text{cm}^{-1}$ ) 2954, 2923, 2403, 1733, 1684, 1163, 1083, 755.

**Dimethyl (*R*)-3-(4-bromophenyl)-4-oxo-5-tosyl-1,3,4,5-tetrahydro-2*H*-cyclopenta[*c*]quinoline-2,2-dicarboxylate (3d)**

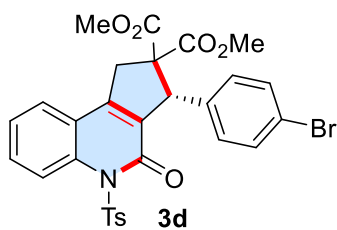

Following the general procedure, LiCl (8.5 mg, 0.2 mmol) was taken from glove box in an oven dried Schlenk tube. Then triazolium salt **4** (7.4 mg, 0.04 mmol), dimethyl 2-(2-(2-((4-methylphenyl)sulfonamido) phenyl)-2-oxoethyl)malonate **1a** (84.0 mg, 0.2 mmol), bisquinone oxidant **8** (163.4 mg, 0.4 mmol) and (*E*)-3-(4-bromophenyl)acryl aldehyde **2d** (84.4 mg, 0.4 mmol) were added to it. Then mixture of solvent toluene:benzene (4:1 ratio, 2.0 mL) was added under nitrogen atmosphere to it and kept stirring at 25 °C. Then DMAP (36.7 mg, 0.3 mmol) was added to the reaction mixture and kept for stirring at 25 °C for 12 h. Then, the solvent was evaporated, and the crude mixture was purified by flash column chromatography (Pet. Ether/EtOAc- 80/20) using neutral alumina to afford dimethyl (*R*)-3-(4-bromophenyl)-4-oxo-5-tosyl-1,3,4,5-tetrahydro-2*H*-cyclopenta[*c*]quinoline-2,2-dicarboxylate **3d** as a yellow solid (58.7 mg, 48% yield).

$R_f$ (Pet. ether /EtOAc = 70/30): 0.37; er = 99:1,  $[\alpha]_D^{22} = -59.24$  (c 1.0, CHCl<sub>3</sub>). **HPLC** (Chiralpak IA, hexane/IPA = 70:30, flow rate = 0.7 mL/min,  $\lambda = 254$  nm)  $t_R = 16.9$  min (major),  $t_R = 29.8$  min (minor).

**<sup>1</sup>H NMR (400 MHz, CDCl<sub>3</sub>)**  $\delta$  8.40 (d,  $J = 8.7$  Hz, 1H), 7.84 (d,  $J = 8.4$  Hz, 2H), 7.61 – 7.52 (m, 2H), 7.39 (t,  $J = 7.5$  Hz, 1H), 7.22 (d,  $J = 8.3$  Hz, 4H), 6.78 (d,  $J = 8.3$  Hz, 2H), 5.25 (s, 1H), 4.16 (dd,  $J_1 = 18.5$  Hz,  $J_2 = 1.7$  Hz, 1H), 3.77 (s, 3H), 3.55 (d,  $J = 18.5$  Hz, 1H), 3.20 (s, 3H), 2.42 (s, 3H). **<sup>13</sup>C NMR (100 MHz, CDCl<sub>3</sub>)**  $\delta$  171.1, 168.8, 158.8, 150.5, 145.4, 138.4, 136.4, 136.0, 132.2, 131.3, 130.4, 130.2, 129.4, 128.9, 125.6, 124.9, 121.5, 120.3, 119.6, 64.7, 55.0, 53.6, 52.7, 39.4, 21.9. **HRMS (ESI)**  $m/z$ :  $[M+H]^+$  Calcd for C<sub>29</sub>H<sub>25</sub>BrNO<sub>7</sub>S: 610.0530; Found: 610.0532. **FTIR (cm<sup>-1</sup>)** 2953, 2924, 2362, 1735, 1681, 1598, 1364, 1324, 1261, 1165, 1119, 931, 756.

### Dimethyl (*R*)-3-(4-chlorophenyl)-4-oxo-5-tosyl-1,3,4,5-tetrahydro-2*H*-cyclopenta[*c*]quinoline-2,2-dicarboxylate (**3e**)

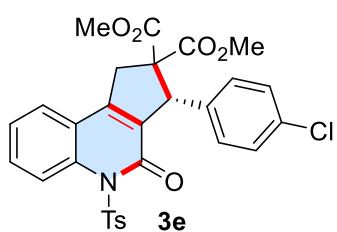

Following the general procedure, LiCl (8.5 mg, 0.2 mmol) was taken from glove box in an oven dried Schlenk tube. Then triazolium salt **4** (7.4 mg, 0.04 mmol), dimethyl 2-(2-(2-((4-methylphenyl)sulfonamido) phenyl)-2-oxoethyl)malonate **1a** (84.0 mg, 0.2 mmol), bisquinone oxidant **8** (163.4 mg, 0.4 mmol) and (*E*)-

3-(4-chlorophenyl)acryl aldehyde **2a** (84.4 mg, 0.4 mmol) were added to it. Then mixture of solvent toluene:benzene (4:1 ratio, 2.0 mL) was added under nitrogen atmosphere to it and kept stirring at 25 °C. Then DMAP (36.7 mg, 0.3 mmol) was added to the reaction mixture and kept

for stirring at 25 °C for 12 h. Then, the solvent was evaporated, and the crude mixture was purified by flash column chromatography (Pet. Ether/EtOAc- 80/20) using neutral alumina to afford dimethyl (*R*)-3-(4-chlorophenyl)-4-oxo-5-tosyl-1,3,4,5-tetrahydro-2*H*-cyclopenta[*c*]quinoline-2,2-dicarboxylate **3e** as a yellow solid (60.1 mg, 53% yield).

$R_f$  (Pet. ether /EtOAc = 70/30): 0.36; er = 99:1,  $[\alpha]_D^{22} = -55.62$  (c 1.0, CHCl<sub>3</sub>). **HPLC** (Chiralcel OD-H, hexane/IPA = 70:30, flow rate = 0.7 mL/min,  $\lambda = 254$  nm)  $t_R = 15.9$  min (minor),  $t_R = 20.3$  min (major).

**<sup>1</sup>H NMR (400 MHz, CDCl<sub>3</sub>)**  $\delta$  8.40 (d,  $J = 8.7$  Hz, 1H), 7.84 (d,  $J = 8.3$  Hz, 2H), 7.61 – 7.55 (m, 2H), 7.39 (t,  $J = 7.5$  Hz, 1H), 7.21 (d,  $J = 8.2$  Hz, 2H), 7.07 (d,  $J = 8.4$  Hz, 2H), 6.84 (d,  $J = 8.3$  Hz, 2H), 5.26 (s, 1H), 4.17 (dd,  $J_1 = 18.5$ ,  $J_2 = 1.5$  Hz, 1H), 3.77 (s, 3H), 3.56 (d,  $J = 18.5$  Hz, 1H), 3.21 (s, 3H), 2.41 (s, 3H). **<sup>13</sup>C NMR (100 MHz, CDCl<sub>3</sub>)**  $\delta$  171.1, 168.8, 158.8, 150.4, 145.4, 138.3, 136.3, 135.4, 133.3, 132.2, 130.4, 129.9, 129.4, 128.9, 128.3, 125.6, 124.9, 120.3, 119.6, 64.7, 54.9, 53.6, 52.7, 39.3, 21.8. **HRMS (ESI)**  $m/z$ :  $[M+H]^+$  Calcd for C<sub>29</sub>H<sub>25</sub>ClNO<sub>7</sub>S: 566.1035; Found: 566.1040. **FTIR (cm<sup>-1</sup>)** 2954, 2925, 1733, 1680, 1598, 1491, 1364, 1261, 1166, 1081, 753.

#### Dimethyl (*R*)-3-(4-fluorophenyl)-4-oxo-5-tosyl-1,3,4,5-tetrahydro-2*H*-cyclopenta[*c*]quinoline-2,2-dicarboxylate (**3f**)

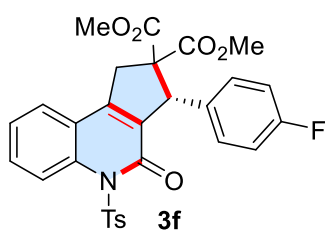

Following the general procedure, LiCl (8.5 mg, 0.2 mmol) was taken from glove box in an oven dried Schlenk tube. Then triazolium salt **4** (7.4 mg, 0.04 mmol), dimethyl 2-(2-(2-((4-methylphenyl)sulfonamido) phenyl)-2-oxoethyl)malonate **1a** (84.0 mg, 0.2 mmol) and bisquinone oxidant **8** (163.4 mg, 0.4 mmol) were added to it. Then

mixture of solvent toluene:benzene (4:1 ratio, 2.0 mL) was added to it under nitrogen atmosphere and kept stirring at 25 °C. Then (*E*)-3-(4-fluorophenyl)acrylaldehyde **2f** (60.1 mg, 0.4 mmol) followed by DMAP (36.7 mg, 0.3 mmol) were added to the reaction mixture and kept for stirring at 25 °C for 12 h. Then, the solvent was evaporated, and the crude mixture was purified by flash column chromatography (Pet. Ether/EtOAc- 80/20) using neutral alumina to afford dimethyl (*R*)-3-(4-fluorophenyl)-4-oxo-5-tosyl-1,3,4,5-tetrahydro-2*H*-cyclopenta[*c*]quinoline-2,2-dicarboxylate **3f** as a yellow solid (73.8 mg, 67% yield).

$R_f$  (Pet. ether /EtOAc = 70/30): 0.33; er = 99:1,  $[\alpha]_D^{22} = -72.42$  (c 1.0, CHCl<sub>3</sub>). **HPLC** (Chiralcel OD-H, hexane/IPA = 70:30, flow rate = 0.7 mL/min,  $\lambda = 254$  nm)  $t_R = 15.1$  min (minor),  $t_R = 20.1$  min (major).

**<sup>1</sup>H NMR (400 MHz, CDCl<sub>3</sub>)** δ 8.40 (d, *J* = 8.7 Hz, 1H), 7.85 (d, *J* = 8.3 Hz, 2H), 7.61 – 7.55 (m, 2H), 7.39 (t, *J* = 7.5 Hz, 1H), 7.21 (d, *J* = 8.2 Hz, 2H), 6.91– 6.77 (m, 4H), 5.27 (s, 1H), 4.17 (dd, *J*<sub>1</sub> = 18.5, *J*<sub>2</sub> = 1.6 Hz, 1H), 3.77 (s, 3H), 3.55 (d, *J* = 18.5 Hz, 1H), 3.21 (s, 3H), 2.40 (s, 3H). **<sup>13</sup>C NMR (100 MHz, CDCl<sub>3</sub>)** δ 171.2, 168.9, 162.2 (d, *J* = 245.2 Hz), 158.9, 150.2, 145.3, 138.4, 136.5, 132.7 (d, *J* = 3.0 Hz), 132.6, 130.3, 130.2 (d, *J* = 8.2 Hz), 129.4, 128.9, 125.6, 124.8, 120.3, 119.7, 115.1 (d, *J* = 21.4 Hz), 64.8, 54.9, 53.6, 52.6, 39.3, 21.8. **HRMS (ESI)** *m/z*: [M+H]<sup>+</sup> Calcd for C<sub>29</sub>H<sub>25</sub>FNO<sub>7</sub>S: 550.1330; Found: 550.1335. **FTIR (cm<sup>-1</sup>)** 2955, 2924, 1732, 1680, 1599, 1504, 1363, 4225, 1162, 1079, 805, 752.

**Dimethyl (*R*)-4-oxo-5-tosyl-3-(4-(trifluoromethyl)phenyl)-1,3,4,5-tetrahydro-2*H*-cyclopenta[*c*]quinoline-2,2-dicarboxylate (**3g**)**

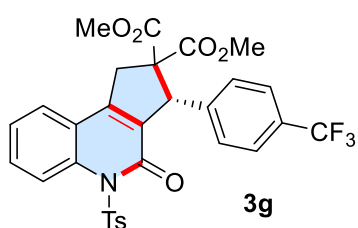

Following the general procedure, LiCl (8.5 mg, 0.2 mmol) was taken from glove box in an oven dried Schlenk tube. Then triazolium salt **4** (7.4 mg, 0.04 mmol), dimethyl 2-(2-(2-((4-methylphenyl)sulfonamido)phenyl)-2-oxoethyl)malonate **1a** (84.0 mg, 0.2 mmol), bisquinone oxidant **8** (163.4 mg, 0.4 mmol) and (*E*)-3-(4-(trifluoromethyl)phenyl)acryl aldehyde **2g** (80.1 mg, 0.4 mmol) were added to it. Then mixture of solvent toluene:benzene (4:1 ratio, 2.0 mL) was added to it under nitrogen atmosphere and kept stirring at 25 °C. After that DMAP (36.7 mg, 0.3 mmol) were added to the reaction mixture and kept for stirring at 25 °C for 12 h. Then, the solvent was evaporated, and the crude mixture was purified by flash column chromatography (Pet. Ether/EtOAc- 80/20) using neutral alumina to afford dimethyl (*R*)-4-oxo-5-tosyl-3-(4-(trifluoromethyl)phenyl)-1,3,4,5-tetrahydro-2*H*-cyclopenta[*c*]quinoline-2,2-dicarboxylate **3g** as a white solid (51.2 mg, 43% yield).

**R<sub>f</sub>**(Pet. ether /EtOAc = 70/30): 0.39; er = 98:2, [α]<sub>D</sub><sup>22</sup> = -46.98 (c 1.0, CHCl<sub>3</sub>). **HPLC** (Chiralpak IA, hexane/IPA = 70:30, flow rate = 0.7 mL/min, λ = 254 nm) t<sub>R</sub> = 13.1 min (major), t<sub>R</sub> = 19.1 min (minor).

**<sup>1</sup>H NMR (400 MHz, CDCl<sub>3</sub>)** δ 8.42 (d, *J* = 8.7 Hz, 1H), 7.84 (d, *J* = 8.3 Hz, 2H), 7.62-7.56 (m, 2H), 7.42-7.34 (m, 3H), 7.21 (d, *J* = 8.3 Hz, 2H), 7.03 (d, *J* = 7.9 Hz, 2H), 5.36 (s, 1H), 4.19 (dd, *J*<sub>1</sub> = 18.5 Hz, *J*<sub>2</sub> = 1.3 Hz, 1H), 3.79 (s, 3H), 3.58 (d, *J* = 18.5 Hz, 1H), 3.13 (s, 3H), 2.39 (s, 3H). **<sup>13</sup>C NMR (100 MHz, CDCl<sub>3</sub>)** δ 171.0, 168.8, 158.8, 150.9, 145.4, 141.1, 138.4, 136.3, 131.6, 130.5, 129.6 (q, *J* = 31.9 Hz), 129.4, 128.94, 128.91, 125.6, 125.0 (q, *J* = 3.6 Hz), 124.9, 124.1 (q, *J* = 272.9 Hz), 120.3, 119.5, 64.8, 55.2, 53.7, 52.6, 39.5, 21.6. **HRMS (ESI)** *m/z*: [M+H]<sup>+</sup>



Calcd for C<sub>30</sub>H<sub>25</sub>F<sub>3</sub>NO<sub>7</sub>S: 600.1298; Found: 600.1301. **FTIR** (cm<sup>-1</sup>) 2953, 2923, 2853, 1734, 1681, 1598, 1444, 1232, 1165, 1073, 931, 755.

**Dimethyl (*R*)-3-(4-nitrophenyl)-4-oxo-5-tosyl-1,3,4,5-tetrahydro-2*H*-cyclopenta[*c*]quinoline-2,2-dicarboxylate (**3h**)**

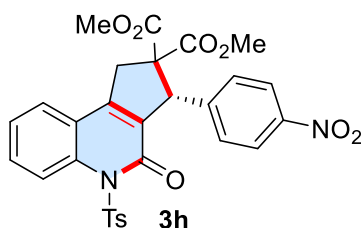

Following the general procedure, LiCl (8.5 mg, 0.2 mmol) was taken from glove box in an oven dried Schlenk tube. Then triazolium salt **4** (7.4 mg, 0.04 mmol), dimethyl 2-(2-(2-(4-methylphenyl)sulfonamido)phenyl)-2-oxoethyl)malonate **1a** (84.0 mg, 0.2 mmol), bisquinone oxidant **8** (163.4 mg, 0.4 mmol) and (*E*)-3-(4-nitrophenyl)acrylaldehyde **2h** (70.9 mg, 0.4 mmol) were added to it. Then mixture of solvent toluene:benzene (4:1 ratio, 2.0 mL) was added to it under nitrogen atmosphere and kept stirring at 25 °C. Then DMAP (36.7 mg, 0.3 mmol) was added to the reaction mixture and kept for stirring at 25 °C for 12 h. Then, the solvent was evaporated, and the crude mixture was purified by flash column chromatography (Pet. Ether/EtOAc- 80/20) using neutral alumina to afford Dimethyl (*R*)-3-(4-nitrophenyl)-4-oxo-5-tosyl-1,3,4,5-tetrahydro-2*H*-cyclopenta[*c*]quinoline-2,2-dicarboxylate **3h** as a yellow solid (40.4 mg, 35% yield).

**R<sub>f</sub>**(Pet. ether /EtOAc = 70/30): 0.28; er = 97:3, [α]<sub>D</sub><sup>22</sup> = -23.71 (c 1.0, CHCl<sub>3</sub>). **HPLC** (Chiralpak IA, hexane/IPA = 70:30, flow rate = 0.7 mL/min, λ = 254 nm) t<sub>R</sub> = 21.1 min (major), t<sub>R</sub> = 44.9 min (minor).

**<sup>1</sup>H NMR (400 MHz, CDCl<sub>3</sub>)** δ 8.43 (d, *J* = 8.7 Hz, 1H), 7.96 (d, *J* = 8.9 Hz, 2H), 7.85 (d, *J* = 8.4 Hz, 2H), 7.64 – 7.56 (m, 2H), 7.41 (t, *J* = 7.5 Hz, 1H), 7.23 (d, *J* = 8.2 Hz, 2H), 7.09 (d, *J* = 8.5 Hz, 2H), 5.41 (s, 1H), 4.19 (dd, *J*<sub>1</sub> = 18.6 Hz, *J*<sub>2</sub> = 1.7 Hz, 1H), 3.81 (s, 3H), 3.60 (d, *J* = 18.6 Hz, 1H), 3.17 (s, 3H), 2.41 (s, 3H). **<sup>13</sup>C NMR (100 MHz, CDCl<sub>3</sub>)** δ 170.8, 168.7, 158.8, 151.2, 147.2, 145.6, 144.8, 138.5, 136.4, 131.3, 130.7, 129.6, 129.4, 129.0, 125.7, 125.0, 123.3, 120.4, 119.4, 64.7, 55.2, 53.8, 52.7, 39.7, 21.7. **HRMS (ESI)** m/z: [M+H]<sup>+</sup> Calcd for C<sub>29</sub>H<sub>25</sub>N<sub>2</sub>O<sub>9</sub>S: 577.1275; Found: 577.1284. **FTIR** (cm<sup>-1</sup>) 2954, 2923, 2855, 1734, 1680, 1568, 1494, 1347, 1164, 1082, 754.

**Dimethyl (*R*)-4-oxo-3-(*m*-tolyl)-5-tosyl-1,3,4,5-tetrahydro-2*H*-cyclopenta[*c*]quinoline-2,2-dicarboxylate (**3i**)**

Following the general procedure, LiCl (8.5 mg, 0.2 mmol) was taken from glove box in an oven dried Schlenk tube. Then triazolium salt **4** (7.4 mg, 0.04 mmol), dimethyl 2-(2-(2-(4-



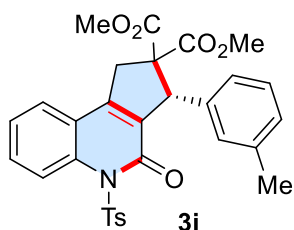

methylphenyl)sulfonamido) phenyl)-2-oxoethyl)malonate **1a** (84.0 mg, 0.2 mmol), bisquinone oxidant **8** (163.4 mg, 0.4 mmol) and (*E*)-3-(*m*-tolyl)acrylaldehyde **2i** (58.5 mg, 0.4 mmol) were added to it. Then mixture of solvent toluene:benzene (4:1 ratio, 2.0 mL) was added to it under nitrogen atmosphere and kept stirring at 25 °C. Then DMAP (36.7 mg, 0.3 mmol) was added to the reaction mixture and kept for stirring at 25 °C for 12 h. Then, the solvent was evaporated, and the crude mixture was purified by flash column chromatography (Pet. Ether/EtOAc- 80/20) using neutral alumina to afford dimethyl (*R*)-4-oxo-3-(*m*-tolyl)-5-tosyl-1,3,4,5-tetrahydro-2*H*-cyclopenta[*c*]quinoline-2,2-dicarboxylate **3i** as a white solid (62.3 mg, 57% yield).

$R_f$ (Pet. ether/EtOAc = 70/30): 0.36; er = 97:3,  $[\alpha]_D^{22} = -76.82$  (c 1.0, CHCl<sub>3</sub>). **HPLC** (Chiralpak IA, hexane/IPA = 70:30, flow rate = 0.7 mL/min,  $\lambda = 254$  nm)  $t_R = 12.4$  min (minor),  $t_R = 13.9$  min (major).

**<sup>1</sup>H NMR (400 MHz, CDCl<sub>3</sub>)**  $\delta$  8.39 (d,  $J = 8.5$  Hz, 1H), 7.88 (d,  $J = 8.3$  Hz, 2H), 7.60 – 7.55 (m, 2H), 7.38 (t,  $J = 7.5$  Hz, 1H), 7.21 (d,  $J = 8.2$  Hz, 2H), 7.00-6.93 (m, 2H), 6.80 (s, 1H), 6.65 (d,  $J = 7.3$  Hz, 1H), 5.23 (s, 1H), 4.18 (dd,  $J_1 = 18.4$  Hz,  $J_2 = 1.6$  Hz, 1H), 3.76 (s, 3H), 3.55 (d,  $J = 18.4$  Hz, 1H), 3.19 (s, 3H), 2.38 (s, 3H), 2.22 (s, 3H). **<sup>13</sup>C NMR (100 MHz, CDCl<sub>3</sub>)**  $\delta$  171.4, 168.8, 158.9, 150.1, 145.1, 138.4, 137.6, 136.6, 136.5, 132.9, 130.1, 129.5, 129.4, 128.7, 128.3, 128.1, 125.6, 125.3, 124.7, 120.2, 119.8, 65.0, 55.5, 53.5, 52.4, 39.2, 21.8, 21.4. **HRMS (ESI)**  $m/z$ :  $[M+H]^+$  Calcd for C<sub>30</sub>H<sub>28</sub>NO<sub>7</sub>S: 546.1581; Found: 546.1583. **FTIR (cm<sup>-1</sup>)** 2953, 2922, 1733, 1681, 1599, 1444, 1364, 1256, 1166, 1079, 753.

### Dimethyl (*R*)-3-(3-methoxyphenyl)-4-oxo-5-tosyl-1,3,4,5-tetrahydro-2*H*-cyclopenta[*c*]quinoline-2,2-dicarboxylate (**3j**)

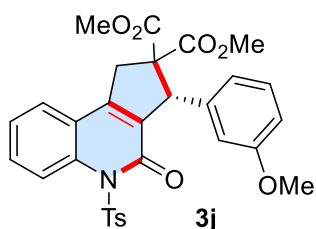

Following the general procedure, LiCl (8.5 mg, 0.2 mmol) was taken from glove box in an oven dried Schlenk tube. Then triazolium salt **4** (7.4 mg, 0.04 mmol), dimethyl 2-(2-(2-((4-methylphenyl)sulfonamido) phenyl)-2-oxoethyl)malonate **1a** (84.0 mg, 0.2 mmol), bisquinone oxidant **8** (163.4 mg, 0.4 mmol) and (*E*)-3-(3-methoxyphenyl)acrylaldehyde **2j** (64.9 mg, 0.4 mmol) were added to it. Then mixture of solvent toluene:benzene (4:1 ratio, 2.0 mL) was added to it under nitrogen atmosphere and kept stirring at 25 °C. Then DMAP (36.7 mg, 0.3 mmol) was added to the reaction mixture and kept for stirring at 25 °C for 12 h. Then, the solvent was evaporated, and the crude mixture was purified

by flash column chromatography (Pet. Ether/EtOAc- 80/20) using neutral alumina to afford dimethyl

(*R*)-3-(3-methoxyphenyl)-4-oxo-5-tosyl-1,3,4,5-tetrahydro-2*H*-cyclopenta[*c*]quinoline-2,2-dicarboxylate **3j** as a yellow solid (55.1 mg, 49% yield).

$R_f$ (Pet. ether /EtOAc = 70/30): 0.28; er = 99:1,  $[\alpha]_D^{22} = -75.86$  (c 1.0, CHCl<sub>3</sub>). **HPLC** (Chiralpak IA, hexane/IPA = 70:30, flow rate = 0.7 mL/min,  $\lambda = 254$  nm)  $t_R = 14.8$  min (minor),  $t_R = 19.9$  min (major).

**<sup>1</sup>H NMR (400 MHz, CDCl<sub>3</sub>)**  $\delta$  8.38 (d,  $J = 8.6$  Hz, 1H), 7.88 (d,  $J = 8.3$  Hz, 2H), 7.59 – 7.54 (m, 2H), 7.38 (t,  $J = 7.5$  Hz, 1H), 7.21 (d,  $J = 8.2$  Hz, 2H), 7.02 (t,  $J = 7.9$  Hz, 1H), 6.68 (dd,  $J_1 = 8.2$  Hz,  $J_2 = 1.7$  Hz, 1H), 6.52 – 6.48 (m, 2H), 5.24 (s, 1H), 4.18 (dd,  $J_1 = 18.4$  Hz,  $J_2 = 1.3$  Hz, 1H), 3.76 (s, 3H), 3.71 (s, 3H), 3.55 (d,  $J = 18.5$  Hz, 1H), 3.23 (s, 3H), 2.38 (s, 3H). **<sup>13</sup>C NMR (100 MHz, CDCl<sub>3</sub>)**  $\delta$  171.3, 168.8, 159.4, 158.9, 150.2, 145.1, 138.3, 138.2, 136.5, 132.8, 130.2, 129.5, 129.2, 128.7, 125.6, 124.8, 120.8, 120.2, 119.7, 114.5, 113.0, 65.0, 55.5, 55.3, 53.5, 52.6, 39.2, 21.8. **HRMS (ESI)**  $m/z$ :  $[M+H]^+$  Calcd for C<sub>30</sub>H<sub>28</sub>NO<sub>8</sub>S: 562.1530; Found: 562.1537. **FTIR (cm<sup>-1</sup>)** 2954, 2920, 2851, 1732, 1681, 1597, 1455, 1257, 1160, 1081, 755.

### Dimethyl (*R*)-3-(3-bromophenyl)-4-oxo-5-tosyl-1,3,4,5-tetrahydro-2*H*-cyclopenta[*c*]quinoline-2,2-dicarboxylate (**3k**)

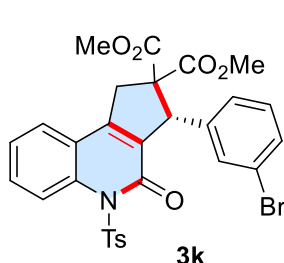

Following the general procedure, LiCl (8.5 mg, 0.2 mmol) was taken from glove box in an oven dried Schlenk tube. Then triazolium salt **4** (7.4 mg, 0.04 mmol), dimethyl 2-(2-(2-((4-methylphenyl)sulfonamido)phenyl)-2-oxoethyl)malonate **1a** (84.0 mg, 0.2 mmol), bisquinone oxidant **8** (163.4 mg, 0.4 mmol) and (*E*)-3-(3-bromophenyl)acryl aldehyde **2k** (84.4 mg, 0.4 mmol) were added to it. Then mixture of solvent toluene:benzene (4:1 ratio, 2.0 mL) was added to it under nitrogen atmosphere and kept stirring at 25 °C. Then DMAP (36.7 mg, 0.3 mmol) was added to the reaction mixture and kept for stirring at 25 °C for 12 h. Then, the solvent was evaporated, and the crude mixture was purified by flash column chromatography (Pet. Ether/EtOAc- 80/20) using neutral alumina to afford dimethyl (*R*)-3-(3-bromophenyl)-4-oxo-5-tosyl-1,3,4,5-tetrahydro-2*H*-cyclopenta[*c*]quinoline-2,2-dicarboxylate **3k** as a white solid (67.2 mg, 55% yield).

$R_f$ (Pet. ether /EtOAc = 70/30): 0.38; er = 98:2,  $[\alpha]_D^{22} = -42.72$  (c 1.0, CHCl<sub>3</sub>). **HPLC** (Chiralpak IA, hexane/IPA = 70:30, flow rate = 0.7 mL/min,  $\lambda = 254$  nm)  $t_R = 13.6$  min (minor),  $t_R = 17.0$  min (major).

**<sup>1</sup>H NMR (400 MHz, CDCl<sub>3</sub>)** δ 8.42 (d, *J* = 8.7 Hz, 1H), 7.86 (d, *J* = 8.3 Hz, 2H), 7.62 – 7.55 (m, 2H), 7.39 (t, *J* = 7.5 Hz, 1H), 7.29 – 7.22 (m, 3H), 7.13 (s, 1H), 6.98 (t, *J* = 7.8 Hz, 1H), 6.82 (d, *J* = 7.7 Hz, 1H), 5.23 (s, 1H), 4.18 (dd, *J*<sub>1</sub> = 18.5 Hz, *J*<sub>2</sub> = 1.5 Hz, 1H), 3.77 (s, 3H), 3.56 (d, *J* = 18.5 Hz, 1H), 3.24 (s, 3H), 2.39 (s, 3H). **<sup>13</sup>C NMR (100 MHz, CDCl<sub>3</sub>)** δ 171.0, 168.6, 158.8, 150.6, 145.2, 139.3, 138.4, 136.4, 132.0, 131.8, 130.7, 130.5, 129.8, 129.5, 128.8, 127.0, 125.7, 124.9, 122.3, 120.3, 119.6, 64.9, 55.1, 53.7, 52.7, 39.3, 21.8. **HRMS (ESI)** *m/z*: [M+H]<sup>+</sup> Calcd for C<sub>29</sub>H<sub>25</sub>BrNO<sub>7</sub>S: 610.0530; Found: 610.0533. **FTIR (cm<sup>-1</sup>)** 2954, 2922, 2855, 1734, 1682, 1442, 1365, 1261, 1163, 1082, 755.

**Dimethyl (*R*)-3-(3-chlorophenyl)-4-oxo-5-tosyl-1,3,4,5-tetrahydro-2*H*-cyclopenta[*c*]quinoline-2,2-dicarboxylate (**3l**)**

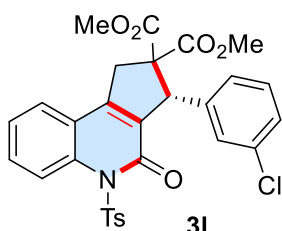

Following the general procedure, LiCl (8.5 mg, 0.2 mmol) was taken from glove box in an oven dried Schlenk tube. Then triazolium salt **4** (7.4 mg, 0.04 mmol), dimethyl 2-(2-(2-((4-methylphenyl) sulfonamido) phenyl)-2-oxoethyl)malonate **1a** (84.0 mg, 0.2 mmol), bisquinone oxidant **8** (163.4 mg, 0.4 mmol) and (*E*)-3-(3-chlorophenyl)acrylaldehyde **2l** (66.6 mg, 0.4 mmol) were added to it. Then mixture of solvent toluene:benzene (4:1 ratio, 2.0 mL) was added to it under nitrogen atmosphere and kept stirring at 25 °C. Then DMAP (36.7 mg, 0.3 mmol) was added to the reaction mixture and kept for stirring at 25 °C for 12 h. Then, the solvent was evaporated, and the crude mixture was purified by flash column chromatography (Pet. Ether/EtOAc- 80/20) using neutral alumina to afford dimethyl dimethyl (*R*)-3-(3-chlorophenyl)-4-oxo-5-tosyl-1,3,4,5-tetrahydro-2*H*-cyclopenta[*c*]quinoline-2,2-dicarboxylate **3l** as a white solid (55.4 mg, 49% yield).

*R<sub>f</sub>*(Pet. ether /EtOAc = 70/30): 0.36; er = 98:2, [α]<sub>D</sub><sup>22</sup> = -54.56 (c 1.0, CHCl<sub>3</sub>). **HPLC** (Chiralpak IA, hexane/IPA = 70:30, flow rate = 0.7 mL/min, λ = 254 nm) *t<sub>R</sub>* = 12.9 min (minor), *t<sub>R</sub>* = 16.4 min (major).

**<sup>1</sup>H NMR (400 MHz, CDCl<sub>3</sub>)** δ 8.41 (d, *J* = 8.7 Hz, 1H), 7.85 (d, *J* = 8.4 Hz, 2H), 7.61 – 7.55 (m, 2H), 7.39 (t, *J* = 7.5 Hz, 1H), 7.22 (d, *J* = 8.2 Hz, 2H), 7.13 – 7.11 (m, 1H), 7.04 (t, *J* = 7.8 Hz, 1H), 6.94 (s, 1H), 6.80 (d, *J* = 7.6 Hz, 1H), 5.24 (s, 1H), 4.18 (dd, *J*<sub>1</sub> = 18.5 Hz, *J*<sub>2</sub> = 1.6 Hz, 1H), 3.77 (s, 3H), 3.57 (d, *J* = 18.5 Hz, 1H), 3.23 (s, 3H), 2.38 (s, 3H). **<sup>13</sup>C NMR (100 MHz, CDCl<sub>3</sub>)** δ 171.0, 168.6, 158.8, 150.6, 145.2, 139.0, 138.4, 136.3, 134.0, 132.0, 130.4, 129.5, 128.7, 127.8, 126.7, 125.6, 124.8, 120.2, 119.5, 64.8, 55.1, 53.6, 52.6, 39.3, 21.8. **HRMS (ESI)**

m/z: [M+H]<sup>+</sup> Calcd for C<sub>30</sub>H<sub>28</sub>NO<sub>7</sub>S: 566.1035; Found: 566.1040. **FTIR** (cm<sup>-1</sup>) 2954, 2923, 2853, 1734, 1681, 1597, 1365, 1263, 1081, 932, 756.

**Dimethyl (*R*)-3-(2-bromophenyl)-4-oxo-5-tosyl-1,3,4,5-tetrahydro-2*H*-cyclopenta[*c*]quinoline-2,2-dicarboxylate (**3m**)**

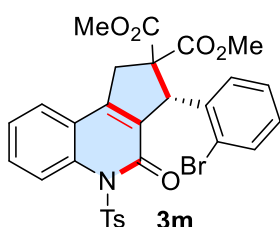

Following the general procedure, LiCl (8.5 mg, 0.2 mmol) was taken from glove box in an oven dried Schlenk tube. Then triazolium salt **4** (7.4 mg, 0.04 mmol), dimethyl 2-(2-(2-((4-methylphenyl) sulfonamido) phenyl)-2-oxoethyl)malonate **1a** (84.0 mg, 0.2 mmol), bisquinone oxidant **8** (163.4 mg, 0.4 mmol) and (*E*)-3-(2-bromophenyl)acrylaldehyde **2m** (84.4 mg, 0.4 mmol) were added to it. Then mixture of solvent toluene:benzene (4:1 ratio, 2.0 mL) was added to it under nitrogen atmosphere and kept stirring at 25 °C. Then DMAP (36.7 mg, 0.3 mmol) was added to the reaction mixture and kept for stirring at 25 °C for 12 h. Then, the solvent was evaporated, and the crude mixture was purified by flash column chromatography (Pet. Ether/EtOAc- 80/20) using neutral alumina to afford dimethyl (*R*)-3-(2-bromophenyl)-4-oxo-5-tosyl-1,3,4,5-tetrahydro-2*H*-cyclopenta[*c*]quinoline-2,2-dicarboxylate **3m** as a yellow solid (47.7 mg, 39% yield).

**R<sub>f</sub>** (Pet. ether /EtOAc = 70/30): 0.38; er = 87:13, [α]<sub>D</sub><sup>22</sup> = -51.13 (c 1.0, CHCl<sub>3</sub>). **HPLC** (Chiralpak IA, hexane/IPA = 70:30, flow rate = 0.7 mL/min, λ = 254 nm) t<sub>R</sub> = 14.3 min (minor), t<sub>R</sub> = 15.4 min (major).

**<sup>1</sup>H NMR (400 MHz, CDCl<sub>3</sub>)** δ 8.36 (d, *J* = 8.6 Hz, 1H), 7.88 (d, *J* = 8.3 Hz, 2H), 7.59 – 7.48 (m, 3H), 7.38 (t, *J* = 7.5 Hz, 1H), 7.21 (d, *J* = 8.2 Hz, 2H), 7.01 – 6.94 (m, 2H), 6.58-7.54 (m, 1H), 5.95 (d, *J* = 1.7 Hz, 1H), 4.27 (dd, *J*<sub>1</sub> = 18.7 Hz, *J*<sub>2</sub> = 1.9 Hz, 1H), 3.79 (s, 3H), 3.56 (d, *J* = 18.7 Hz, 1H), 3.20 (s, 3H), 2.38 (s, 3H). **<sup>13</sup>C NMR (100 MHz, CDCl<sub>3</sub>)** δ 171.0, 168.8, 158.5, 150.2, 145.1, 138.4, 137.0, 136.5, 133.1, 130.3, 129.5, 128.8, 128.7, 128.5, 127.3, 126.2, 125.6, 124.8, 120.3, 119.6, 64.2, 54.2, 53.6, 52.4, 39.9, 21.8. **HRMS (ESI)** m/z: [M+H]<sup>+</sup> Calcd for C<sub>29</sub>H<sub>25</sub>BrNO<sub>7</sub>S: 610.0530; Found: 610.0554. **FTIR** (cm<sup>-1</sup>) 2954, 2924, 2856, 1732, 1652, 1443, 1218, 1160, 1089, 913, 758.

**Dimethyl (*R*)-3-(2-chlorophenyl)-4-oxo-5-tosyl-1,3,4,5-tetrahydro-2*H*-cyclopenta[*c*]quinoline-2,2-dicarboxylate (**3n**)**

Following the general procedure, LiCl (8.5 mg, 0.2 mmol) was taken from glove box in an oven dried Schlenk tube. Then triazolium salt **4** (7.4 mg, 0.04 mmol), dimethyl 2-(2-(2-((4-

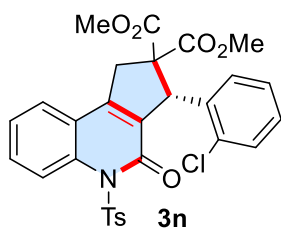

methylphenyl) sulfonamido) phenyl)-2-oxoethyl)malonate **1a** (84.0 mg, 0.2 mmol), bisquinone oxidant **8** (163.4 mg, 0.4 mmol) and (*E*)-3-(2-chlorophenyl) acrylaldehyde **2n** (66.6 mg, 0.4 mmol) were added to it. Then mixture of solvent toluene:benzene (4:1 ratio, 2.0 mL) was added to it under nitrogen atmosphere and kept stirring at 25 °C. Then DMAP (36.7 mg, 0.3 mmol) was added to the reaction mixture and kept for stirring at 25 °C for 12 h. Then, the solvent was evaporated, and the crude mixture was purified by flash column chromatography (Pet. Ether/EtOAc- 80/20) using neutral alumina to afford dimethyl (*R*)-3-(2-chlorophenyl)-4-oxo-5-tosyl-1,3,4,5-tetrahydro-2*H*-cyclopenta[*c*] quinoline-2,2-dicarboxylate **3n** as a yellow solid (44.5 mg, 41% yield).

$R_f$ (Pet. ether/EtOAc = 70/30): 0.34; er = 95:5,  $[\alpha]_D^{22} = -66.28$  (c 1.0, CHCl<sub>3</sub>). **HPLC** (Chiralpak IA, hexane/IPA = 70:30, flow rate = 0.7 mL/min,  $\lambda = 254$  nm)  $t_R = 13.4$  min (minor),  $t_R = 14.9$  min (major).

**<sup>1</sup>H NMR (400 MHz, CDCl<sub>3</sub>)**  $\delta$  8.37 (d,  $J = 8.6$  Hz, 1H), 7.88 (d,  $J = 8.1$  Hz, 2H), 7.59-7.54 (m, 2H), 7.38 (t,  $J = 7.5$  Hz, 1H), 7.32 (d,  $J = 8.0$  Hz, 1H), 7.21 (d,  $J = 8.1$  Hz, 2H), 7.07 (t,  $J = 7.6$  Hz, 1H), 6.92 (t,  $J = 7.5$  Hz, 1H), 6.57 (d,  $J = 7.7$  Hz, 1H), 5.97 (s, 1H), 4.27 (d,  $J = 18.6$  Hz, 1H), 3.78 (s, 3H), 3.57 (d,  $J = 18.7$  Hz, 1H), 3.20 (s, 3H), 2.38 (s, 3H). **<sup>13</sup>C NMR (100 MHz, CDCl<sub>3</sub>)**  $\delta$  171.1, 168.9, 158.6, 150.4, 145.1, 138.4, 136.5, 135.3, 135.2, 132.9, 130.3, 129.8, 129.5, 128.7, 128.6, 128.4, 126.6, 125.6, 124.8, 120.3, 119.6, 64.2, 53.6, 52.5, 51.4, 39.9, 21.8. **HRMS (ESI)**  $m/z$ :  $[M+Na]^+$  Calcd for C<sub>29</sub>H<sub>24</sub>ClNO<sub>7</sub>SNa: 588.0854; Found: 588.0862. **FTIR (cm<sup>-1</sup>)** 2953, 2924, 1734, 1683, 1442, 1365, 1260, 1165, 1083, 755.

### Dimethyl (*R*)-3-(2-fluorophenyl)-4-oxo-5-tosyl-1,3,4,5-tetrahydro-2*H*-cyclopenta[*c*]quinoline-2,2-dicarboxylate (**3o**)

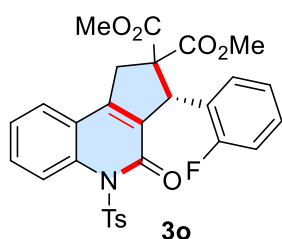

Following the general procedure, LiCl (8.5 mg, 0.2 mmol) was taken from glove box in an oven dried Schlenk tube. Then triazolium salt **4** (7.4 mg, 0.04 mmol), dimethyl 2-(2-(2-((4-methyl phenyl)sulfonamido) phenyl)-2-oxoethyl)malonate **1a** (84.0 mg, 0.2 mmol) and bisquinone oxidant **8** (163.4 mg, 0.4 mmol) were added to it. Then mixture of solvent toluene:benzene (4:1 ratio, 2.0 mL) was added to it under nitrogen atmosphere and kept stirring at 25 °C. Then (*E*)-3-(2-fluorophenyl)acrylaldehyde **2o** (60.1 mg, 0.4 mmol) followed by DMAP (36.7 mg, 0.3 mmol) were added to the reaction mixture and kept for stirring at 25 °C for 12 h. Then, the solvent was evaporated, and the crude mixture

was purified by flash column chromatography (Pet. Ether/EtOAc- 80/20) using neutral alumina to afford dimethyl (*R*)-3-(2-fluorophenyl)-4-oxo-5-tosyl-1,3,4,5-tetrahydro-2*H*-cyclopenta[*c*]quinoline-2,2-dicarboxylate **3o** as a yellow solid (72.5 mg, 66% yield).

$R_f$ (Pet. ether /EtOAc = 70/30): 0.35; er = 98:2,  $[\alpha]_D^{22} = -27.35$  (c 1.0, CHCl<sub>3</sub>). **HPLC** (Chiralpak IA, hexane/IPA = 70:30, flow rate = 0.7 mL/min,  $\lambda = 254$  nm)  $t_R = 15.9$  min (minor),  $t_R = 17.2$  min (major).

**<sup>1</sup>H NMR (400 MHz, CDCl<sub>3</sub>)**  $\delta$  8.38 (d,  $J = 8.6$  Hz, 1H), 7.86 (d,  $J = 8.3$  Hz, 2H), 7.59 – 7.54 (m, 2H), 7.38 (t,  $J = 7.5$  Hz, 1H), 7.22 – 7.10 (m, 3H), 6.90 – 6.74 (m, 3H), 5.61 (s, 1H), 4.27 (d,  $J = 18.5$  Hz, 1H), 3.77 (s, 3H), 3.56 (d,  $J = 18.6$  Hz, 1H), 3.21 (s, 3H), 2.38 (s, 3H).

**<sup>13</sup>C NMR (100 MHz, CDCl<sub>3</sub>)**  $\delta$  171.1, 168.9, 160.9 (d,  $J = 248.2$  Hz), 158.7, 150.5, 145.1, 138.3, 136.5, 131.8, 130.2, 129.4, 129.2 (d,  $J = 8.3$  Hz), 128.7, 125.5, 124.8, 124.4 (d,  $J = 13.6$  Hz), 123.9 (d,  $J = 3.4$  Hz), 120.2, 119.7, 115.5 (d,  $J = 22.5$  Hz), 64.3, 53.6, 52.5, 39.7, 21.8. **HRMS (ESI)**  $m/z$ :  $[M+H]^+$  Calcd for C<sub>29</sub>H<sub>25</sub>FNO<sub>7</sub>S: 550.1330; Found: 550.1337. **FTIR (cm<sup>-1</sup>)** 2954, 2922, 2854, 1734, 1681, 1597, 1464, 1258, 1166, 1080, 930, 752.

### Dimethyl (*R*)-3-(3,4-dichlorophenyl)-4-oxo-5-tosyl-1,3,4,5-tetrahydro-2*H*-cyclopenta[*c*]quinoline-2,2-dicarboxylate (**3p**)

Following the general procedure, LiCl (8.5 mg, 0.2 mmol) was taken from glove box in an oven dried Schlenk tube. Then triazolium salt **4** (7.4 mg, 0.04 mmol), dimethyl 2-(2-(2-((4-methylphenyl)sulfonamido) phenyl)-2-oxoethyl)malonate **1a** (84.0 mg, 0.2 mmol), bisquinone oxidant **8** (163.4 mg, 0.4 mmol) and (*E*)-3-(3,4-dichlorophenyl)acrylaldehyde **2p** (80.4 mg, 0.4 mmol) were added to it. Then mixture of solvent toluene:benzene (4:1 ratio, 2.0 mL) was added to it under nitrogen atmosphere and kept stirring at 25 °C. Then DMAP (36.7 mg, 0.3 mmol) was added to the reaction mixture and kept for stirring at 25 °C for 12 h. Then, the solvent was evaporated, and the crude mixture was purified by flash column chromatography (Pet. Ether/EtOAc- 80/20) using neutral alumina to afford dimethyl (*R*)-3-(3,4-dichlorophenyl)-4-oxo-5-tosyl-1,3,4,5-tetrahydro-2*H*-cyclopenta[*c*]quinoline-2,2-dicarboxylate **3p** as a yellow solid (55.3 mg, 46% yield).

$R_f$ (Pet. ether /EtOAc = 70/30): 0.39; er = 97:3,  $[\alpha]_D^{22} = -49.17$  (c 1.0, CHCl<sub>3</sub>). **HPLC** (Chiralcel-OD-H, hexane/IPA = 70:30, flow rate = 0.7 mL/min,  $\lambda = 254$  nm)  $t_R = 16.0$  min (minor),  $t_R = 20.3$  min (major).

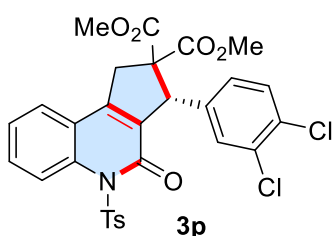

**$^1\text{H}$  NMR (400 MHz,  $\text{CDCl}_3$ )**  $\delta$  8.42 (d,  $J$  = 8.7 Hz, 1H), 7.84 (d,  $J$  = 8.2 Hz, 2H), 7.62 – 7.55 (m, 2H), 7.40 (t,  $J$  = 7.5 Hz, 1H), 7.23 (d,  $J$  = 8.1 Hz, 2H), 7.16 (d,  $J$  = 8.3 Hz, 1H), 7.07 (s, 1H), 6.72 (d,  $J$  = 8.2 Hz, 1H), 5.23 (s, 1H), 4.17 (d,  $J$  = 18.6 Hz, 1H), 3.78 (s, 3H), 3.57 (d,  $J$  = 18.6 Hz, 1H), 3.27 (s, 3H), 2.40 (s, 3H).  **$^{13}\text{C}$  NMR (100 MHz,  $\text{CDCl}_3$ )**  $\delta$  170.9, 168.6, 158.7, 150.8, 145.4, 138.4, 137.4, 136.3, 132.2, 131.65, 131.62, 130.6, 130.5, 130.1, 129.4, 128.8, 127.8, 125.7, 124.9, 120.3, 119.4, 64.7, 54.6, 53.7, 52.8, 39.3, 21.8. **HRMS (ESI)**  $m/z$ :  $[\text{M}+\text{H}]^+$  Calcd for  $\text{C}_{29}\text{H}_{25}\text{BrNO}_7\text{S}$ : 600.0645; Found: 600.0666. **FTIR ( $\text{cm}^{-1}$ )** 2953, 2923, 1734, 1679, 1598, 1444, 1364, 1261, 1167, 1081, 931, 754.

**Dimethyl (*R*)-3-(naphthalen-2-yl)-4-oxo-5-tosyl-1,3,4,5-tetrahydro-2*H*-cyclopenta[*c*]quinoline-2,2-dicarboxylate (**3q**)**

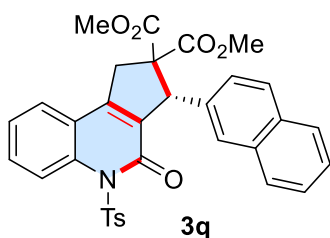

Following the general procedure, LiCl (8.5 mg, 0.2 mmol) was taken from glove box in an oven dried Schlenk tube. Then triazolium salt **4** (7.4 mg, 0.04 mmol), dimethyl 2-(2-(2-((4-methylphenyl)sulfonamido)phenyl)-2-oxoethyl)malonate **1a** (84.0 mg, 0.2 mmol), bisquinone oxidant **8** (163.4 mg, 0.4 mmol) and (*E*)-3-(naphthalen-2-yl)acrylaldehyde **2q** (72.9 mg, 0.4 mmol) were added to it. Then mixture of solvent toluene:benzene (4:1 ratio, 2.0 mL) was added to it under nitrogen atmosphere and kept stirring at 25 °C. Then DMAP (36.7 mg, 0.3 mmol) was added to the reaction mixture and kept for stirring at 25 °C for 12 h. Then, the solvent was evaporated, and the crude mixture was purified by flash column chromatography (Pet. Ether/EtOAc- 80/20) using neutral alumina to afford dimethyl (*R*)-3-(naphthalen-2-yl)-4-oxo-5-tosyl-1,3,4,5-tetrahydro-2*H*-cyclopenta[*c*]quinoline-2,2-dicarboxylate **3q** as a yellow solid (82.6 mg, 71% yield).

**$R_f$** (Pet. ether /EtOAc = 70/30): 0.35; er = 97:3,  $[\alpha]_{\text{D}}^{22} = -62.95$  (c 1.0,  $\text{CHCl}_3$ ). **HPLC** (Chiralcel OD-H, hexane/IPA = 70:30, flow rate = 0.7 mL/min,  $\lambda$  = 254 nm)  $t_{\text{R}}$  = 15.8 min (minor),  $t_{\text{R}}$  = 20.0 min (major).

**$^1\text{H}$  NMR (400 MHz,  $\text{CDCl}_3$ )**  $\delta$  8.42 (d,  $J$  = 8.7 Hz, 1H), 7.79 (d,  $J$  = 8.2 Hz, 2H), 7.74-7.65 (m, 2H), 7.60 (t,  $J$  = 8.2 Hz, 3H), 7.43-7.40 (m, 4H), 7.04 (t,  $J$  = 7.0 Hz, 3H), 5.45 (s, 1H), 4.29 (d,  $J$  = 18.5 Hz, 1H), 3.79 (s, 3H), 3.63 (d,  $J$  = 18.5 Hz, 1H), 3.04 (s, 3H), 2.17 (s, 3H).  **$^{13}\text{C}$  NMR (100 MHz,  $\text{CDCl}_3$ )**  $\delta$  171.3, 168.8, 158.8, 150.1, 145.0, 138.3, 136.3, 134.4, 133.2, 132.9, 132.8, 130.2, 129.3, 128.6, 128.1, 127.8, 127.6, 126.6, 126.0, 125.9, 125.6, 124.8, 120.2, 119.7, 65.1, 55.6, 53.6, 52.5, 39.4, 21.6. **HRMS (ESI)**  $m/z$ :  $[\text{M}+\text{H}]^+$  Calcd for  $\text{C}_{33}\text{H}_{22}\text{NO}_7\text{S}$ : 582.1581;



Found: 582.1588. **FTIR** ( $\text{cm}^{-1}$ ) 2954, 2923, 2853, 1732, 1680, 1363, 1258, 1166, 1079, 930, 808, 751.

**Dimethyl (*R*)-4-oxo-3-(thiophen-3-yl)-5-tosyl-1,3,4,5-tetrahydro-2*H*-cyclopenta[*c*]quinoline-2,2-dicarboxylate (**3r**)**

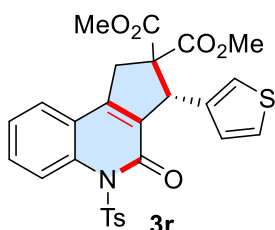

Following the general procedure, LiCl (8.5 mg, 0.2 mmol) was taken from glove box in an oven dried Schlenk tube. Then triazolium salt **4** (7.4 mg, 0.04 mmol), dimethyl 2-(2-(2-((4-methylphenyl) sulfonamido) phenyl)-2-oxoethyl)malonate **1a** (84.0 mg, 0.2 mmol) and bisquinone oxidant **8** (163.4 mg, 0.4 mmol) were added to it. Then mixture of solvent toluene:benzene (4:1 ratio, 2.0 mL) was added to it under nitrogen atmosphere and kept stirring at 25 °C. Then (*E*)-3-(thiophen-3-yl)acrylaldehyde **2r** (55.3 mg, 0.4 mmol) followed by DMAP (36.7 mg, 0.3 mmol) were added to the reaction mixture and kept for stirring at 25 °C for 12 h. Then, the solvent was evaporated, and the crude mixture was purified by flash column chromatography (Pet. Ether/EtOAc- 80/20) using neutral alumina to afford dimethyl (*R*)-3-(thiophen-3-yl)-4-oxo-5-tosyl-1,3,4,5-tetrahydro-2*H*-cyclopenta[*c*]quinoline-2,2-dicarboxylate **3p** as a white solid (61.3 mg, 57% yield).

$R_f$ (Pet. ether /EtOAc = 70/30): 0.33; er = 99:1,  $[\alpha]_D^{22} = -51.04$  (c 1.0,  $\text{CHCl}_3$ ). **HPLC** (Chiralpak AD, hexane/IPA = 70:30, flow rate = 0.7 mL/min,  $\lambda = 254$  nm)  $t_R = 17.4$  min (major),  $t_R = 20.0$  min (minor).

**$^1\text{H}$  NMR (400 MHz,  $\text{CDCl}_3$ )**  $\delta$  8.39 (d,  $J = 8.7$  Hz, 1H), 7.88 (d,  $J = 8.0$  Hz, 2H), 7.59 – 7.53 (m, 2H), 7.38 (t,  $J = 7.5$  Hz, 1H), 7.26-7.23 (m, 2H), 7.08–7.06 (m, 1H), 6.73 (s, 1H), 6.66 (d,  $J = 4.9$  Hz, 1H), 5.37 (s, 1H), 4.15 (d,  $J = 18.4$  Hz, 1H), 3.76 (s, 3H), 3.55 (d,  $J = 18.4$  Hz, 1H), 3.31 (s, 3H), 2.41 (s, 3H).  **$^{13}\text{C}$  NMR (100 MHz,  $\text{CDCl}_3$ )**  $\delta$  171.1, 168.9, 158.9, 149.8, 145.2, 138.3, 137.0, 136.5, 132.7, 130.2, 129.5, 128.9, 127.7, 125.5, 125.1, 124.8, 123.1, 120.3, 119.7, 64.6, 53.5, 52.7, 50.5, 38.9, 21.8. **HRMS (ESI)**  $m/z$ :  $[\text{M}+\text{H}]^+$  Calcd for  $\text{C}_{27}\text{H}_{24}\text{NO}_7\text{S}_2$ : 538.0989; Found: 538.0994. **FTIR** ( $\text{cm}^{-1}$ ) 2953, 2924, 1734, 1682, 1444, 1364, 1259, 1168, 1080, 930, 755.

**Dimethyl (*R*)-3-ethyl-4-oxo-5-tosyl-1,3,4,5-tetrahydro-2*H*-cyclopenta[*c*]quinoline-2,2-dicarboxylate (**3s**)**

Following the general procedure, LiCl (8.5 mg, 0.2 mmol) was taken from glove box in an oven



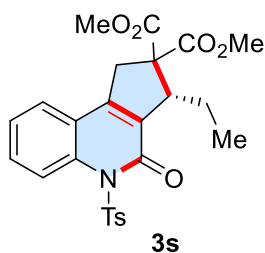

dried Schlenk tube. Then triazolium salt **4** (7.4 mg, 0.04 mmol), dimethyl 2-(2-(2-((4-methylphenyl) sulfonamido) phenyl)-2-oxoethyl)malonate **1a** (84.0 mg, 0.2 mmol) and bisquinone oxidant **8** (163.4 mg, 0.4 mmol) were added to it. Then mixture of solvent toluene:benzene (4:1 ratio, 2.0 mL) was added to it under nitrogen atmosphere and kept stirring at 25 °C. Then (*E*)-pent-2-enal (19.6 mg, 0.4 mmol) followed by DMAP (36.7 mg, 0.3 mmol) were added to the reaction mixture and kept for stirring at 25 °C for 12 h. Then, the solvent was evaporated, and the crude mixture was purified by flash column chromatography (Pet. Ether/EtOAc- 80/20) using neutral alumina to afford dimethyl (*R*)-3-ethyl-4-oxo-5-tosyl-1,3,4,5-tetrahydro-2*H*-cyclopenta[*c*]quinoline-2,2-dicarboxylate **3s** as a yellow liquid (30 mg, 31% yield).

$R_f$ (Pet. ether /EtOAc = 70/30): 0.33; er = 97:3,  $[\alpha]_D^{22} = -85.20$  (c 1.0, CHCl<sub>3</sub>). **HPLC** (Chiralpak AD, hexane/IPA = 70:30, flow rate = 0.7 mL/min,  $\lambda = 254$  nm)  $t_R = 9.9$  min (minor),  $t_R = 11.5$  min (major).

**<sup>1</sup>H NMR (400 MHz, CDCl<sub>3</sub>)**  $\delta$  8.39 (d,  $J = 8.7$  Hz, 1H), 7.98 (d,  $J = 8.1$  Hz, 2H), 7.54 (t,  $J = 7.9$  Hz, 1H), 7.47 (d,  $J = 7.5$  Hz, 1H), 7.33 (t,  $J = 8.1$  Hz, 3H), 4.05 (t,  $J = 5.8$  Hz, 1H), 3.93 (d,  $J = 18.1$  Hz, 1H), 3.78 (s, 3H), 3.68 (s, 3H), 3.52 (d,  $J = 18.1$  Hz, 1H), 2.43 (s, 3H), 1.9-1.61 (m, 1H), 1.56-1.48 (m, 1H), 0.65 (t,  $J = 7.5$  Hz, 3H). **<sup>13</sup>C NMR (100 MHz, CDCl<sub>3</sub>)**  $\delta$  171.6, 169.9, 159.7, 149.5, 145.2, 138.1, 136.9, 133.7, 130.0, 129.6, 128.7, 125.4, 124.7, 119.9, 63.6, 53.4, 53.0, 50.1, 39.1, 22.7, 21.8, 11.0. **HRMS (ESI)**  $m/z$ :  $[M+Na]^+$  Calcd for C<sub>25</sub>H<sub>25</sub>NO<sub>7</sub>SNa: 506.1244; Found: 506.1249. **FTIR (cm<sup>-1</sup>)** 2956, 2926, 1729, 1680, 1443, 1257, 1164, 1088, 916, 756.

### Diethyl (*R*)-4-oxo-3-phenyl-5-tosyl-1,3,4,5-tetrahydro-2*H*-cyclopenta[*c*]quinoline-2,2-dicarboxylate (**3t**)

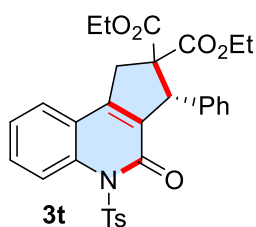

Following the general procedure, LiCl (8.5 mg, 0.2 mmol) was taken from glove box in an oven dried Schlenk tube. Then triazolium salt **4** (7.4 mg, 0.04 mmol), diethyl 2-(2-(2-((4-methylphenyl) sulfonamido)phenyl)-2-oxoethyl)malonate **1t** (89.5 mg, 0.2 mmol) and bisquinone oxidant **8** (163.4 mg, 0.4 mmol) were added to it. Then mixture of solvent toluene:benzene (4:1 ratio, 2.0 mL) was added to it under nitrogen atmosphere and kept stirring at 25 °C. Then cinnamaldehyde **2a** (52.9 mg, 50.3  $\mu$ L, 0.4 mmol) and followed by DMAP (36.7 mg, 0.3 mmol) were added to the reaction mixture and kept for stirring at 25 °C for 12 h. Then, the solvent was evaporated, and the crude mixture was purified by flash column chromatography (Pet.

Ether/EtOAc- 80/20) using neutral alumina to afford diethyl (*R*)-4-oxo-3-phenyl-5-tosyl-1,3,4,5-tetrahydro-2*H*-cyclopenta[*c*]quinoline-2,2-dicarboxylate **3t** as a white solid (72.8 mg, 65% yield).

$R_f$  (Pet. ether /EtOAc = 70/30): 0.36; er = >99:1,  $[\alpha]_D^{22} = -84.18$  (c 1.0, CHCl<sub>3</sub>). **HPLC** (Chiralpak IA, hexane/IPA = 70:30, flow rate = 0.7 mL/min,  $\lambda = 254$  nm)  $t_R = 10.9$  min (minor),  $t_R = 14.5$  min (major).

**<sup>1</sup>H NMR (400 MHz, CDCl<sub>3</sub>)**  $\delta$  8.38 (d,  $J = 8.7$  Hz, 1H), 7.84 (d,  $J = 8.4$  Hz, 2H), 7.59 – 7.55 (m, 2H), 7.38 (t,  $J = 7.5$  Hz, 1H), 7.19 (d,  $J = 8.2$  Hz, 2H), 7.14 – 7.07 (m, 3H), 6.95-6.92 (m, 2H), 5.25 (s, 1H), 4.31 – 4.13 (m, 3H), 3.77-3.69 (m, 1H), 3.56 – 3.43 (m, 2H), 2.38 (s, 3H), 1.25 (t,  $J = 7.1$  Hz, 3H), 0.86 (t,  $J = 7.1$  Hz, 3H). **<sup>13</sup>C NMR (100 MHz, CDCl<sub>3</sub>)**  $\delta$  170.8, 168.5, 158.9, 150.1, 145.0, 138.3, 137.0, 136.5, 133.1, 130.1, 129.4, 128.8, 128.7, 128.1, 127.4, 125.5, 124.7, 120.2, 119.8, 64.8, 62.3, 61.8, 55.4, 39.4, 21.8, 14.1, 13.6. **HRMS (ESI)**  $m/z$ :  $[M+H]^+$  Calcd for C<sub>31</sub>H<sub>30</sub>NO<sub>7</sub>S: 560.1737; Found: 560.1744. **FTIR (cm<sup>-1</sup>)** 2960, 2927, 1730, 1684, 1598, 1451, 1365, 1256, 1170, 1081, 756.

### Diisopropyl (*R*)-4-oxo-3-phenyl-5-tosyl-1,3,4,5-tetrahydro-2*H*-cyclopenta[*c*]quinoline-2,2-dicarboxylate (**3u**)

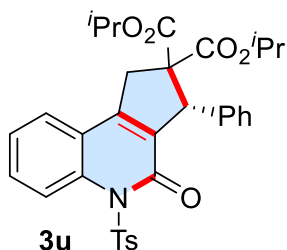

Following the general procedure, LiCl (8.5 mg, 0.2 mmol) was taken from glove box in an oven dried Schlenk tube. Then triazolium salt **4** (7.4 mg, 0.04 mmol), diisopropyl 2-(2-(2-((4-methylphenyl)sulfonamido)phenyl)-2-oxoethyl)malonate **1u** (95.1 mg, 0.2 mmol) and bisquinone oxidant **8** (163.4 mg, 0.4 mmol) were added to it. Then mixture of solvent toluene:benzene (4:1 ratio, 2.0 mL) was added to it under nitrogen atmosphere and kept stirring at 25 °C. Then cinnamaldehyde **2a** (52.9 mg, 50.3  $\mu$ L, 0.4 mmol) and followed by DMAP (36.7 mg, 0.3 mmol) were added to the reaction mixture and kept for stirring at 25 °C for 12 h. Then, the solvent was evaporated, and the crude mixture was purified by flash column chromatography (Pet. Ether/EtOAc- 80/20) using neutral alumina to afford diisopropyl (*R*)-4-oxo-3-phenyl-5-tosyl-1,3,4,5-tetrahydro-2*H*-cyclopenta[*c*]quinoline-2,2-dicarboxylate **3u** as a white solid (51.7 mg, 44% yield).

$R_f$  (Pet. ether /EtOAc = 70/30): 0.31; er = 97:3,  $[\alpha]_D^{22} = -73.72$  (c 1.0, CHCl<sub>3</sub>). **HPLC** (Chiralpak IA, hexane/IPA = 70:30, flow rate = 0.7 mL/min,  $\lambda = 254$  nm)  $t_R = 9.1$  min (minor),  $t_R = 11.6$  min (major).

**<sup>1</sup>H NMR (400 MHz, CDCl<sub>3</sub>)** δ 8.36 (d, *J* = 9.0 Hz, 1H), 7.82 (d, *J* = 8.0 Hz, 2H), 7.56 (t, *J* = 7.5 Hz, 2H), 7.38 (t, *J* = 7.5 Hz, 1H), 7.17 (d, *J* = 8.1 Hz, 2H), 7.10-7.07 (m, 3H), 6.96 (d, *J* = 6.6 Hz, 2H), 5.21 (s, 1H), 5.08-5.02 (m, 1H), 4.49-4.43 (m, 1H), 4.23 (d, *J* = 18.6 Hz, 1H), 3.50 (d, *J* = 18.6 Hz, 1H), 2.37 (s, 3H), 1.25-1.21 (m, 6H), 1.02 (d, *J* = 6.2 Hz, 3H), 0.62 (d, *J* = 6.3 Hz, 3H). **<sup>13</sup>C NMR (100 MHz, CDCl<sub>3</sub>)** δ 170.4, 168.1, 158.8, 149.7, 145.0, 138.2, 137.2, 136.4, 133.6, 130.0, 129.4, 128.9, 128.8, 128.2, 127.3, 125.5, 124.7, 120.3, 119.9, 69.9, 69.8, 64.6, 55.3, 39.8, 21.8, 21.7, 21.6, 21.5, 20.9. **HRMS (ESI)** *m/z*: [M+H]<sup>+</sup> Calcd for C<sub>33</sub>H<sub>34</sub>NO<sub>7</sub>S: 588.2050; Found: 588.2074. **FTIR (cm<sup>-1</sup>)** 2924, 2361, 1724, 1680, 1261, 1163, 1103, 750.

**Dibenzyl (*R*)-4-oxo-3-phenyl-5-tosyl-1,3,4,5-tetrahydro-2*H*-cyclopenta[*c*]quinoline-2,2-dicarboxylate (**3v**)**

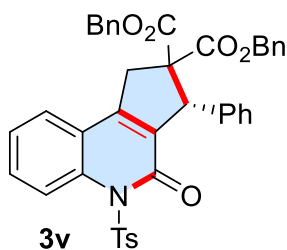

Following the general procedure, LiCl (8.5 mg, 0.2 mmol) was taken from glove box in an oven dried Schlenk tube. Then triazolium salt **4** (7.4 mg, 0.04 mmol), dibenzyl 2-(2-(2-((4-methylphenyl) sulfonamido)phenyl)-2-oxoethyl)malonate **1v** (114.3 mg, 0.2 mmol) and bisquinone oxidant **8** (163.4 mg, 0.4 mmol) were added to it. Then mixture of solvent toluene:benzene (4:1 ratio, 2.0 mL) was added to it under nitrogen atmosphere and kept stirring at 25 °C. Then cinnamaldehyde **2a** (52.9 mg, 50.3 μL, 0.4 mmol) and followed by DMAP (36.7 mg, 0.3 mmol) were added to the reaction mixture and kept for stirring at 25 °C for 12 h. Then, the solvent was evaporated, and the crude mixture was purified by flash column chromatography (Pet. Ether/EtOAc- 80/20) using neutral alumina to afford dibenzyl (*R*)-4-oxo-3-phenyl-5-tosyl-1,3,4,5-tetrahydro-2*H*-cyclopenta[*c*]quinoline-2,2-dicarboxylate **3v** as a white solid (67 mg, 49% yield).

**R<sub>f</sub>** (Pet. ether /EtOAc = 70/30): 0.31; er = >99:1, [α]<sub>D</sub><sup>22</sup> = -80.31 (c 1.0, CHCl<sub>3</sub>). **HPLC** (Chiralpak IA, hexane/IPA = 70:30, flow rate = 0.7 mL/min, λ = 254 nm) t<sub>R</sub> = 25.6 min (minor), t<sub>R</sub> = 28.1 min (major).

**<sup>1</sup>H NMR (400 MHz, CDCl<sub>3</sub>)** δ 8.40 (d, *J* = 8.7 Hz, 1H), 7.85 (d, *J* = 8.1 Hz, 2H), 7.60–7.52 (m, 2H), 7.38 (t, *J* = 7.5 Hz, 1H), 7.28-7.25 (m, 6H), 7.20-7.18 (m, 4H), 7.14-7.06 (m, 3H), 6.99-6.92 (m, 4H), 5.31 (s, 1H), 5.17 – 5.09 (m, 2H), 4.68 (d, *J* = 12.2 Hz, 1H), 4.26 – 4.21 (m, 2H), 3.56 (d, *J* = 18.5 Hz, 1H), 2.38 (s, 3H). **<sup>13</sup>C NMR (100 MHz, CDCl<sub>3</sub>)** δ 170.5, 168.2, 158.8, 150.1, 145.1, 138.3, 136.6, 136.4, 135.0, 134.7, 132.9, 130.1, 129.4, 128.8, 128.7, 128.60, 128.58, 128.5, 128.41, 128.36, 128.3, 128.2, 127.5, 125.5, 124.7, 120.2, 119.7, 68.1, 67.6, 65.0,

55.5, 39.4, 21.8. **HRMS (ESI)** m/z:  $[M+H]^+$  Calcd for  $C_{41}H_{34}NO_7S$ : 684.2050; Found: 684.2081. **FTIR** ( $cm^{-1}$ ) 2924, 1730, 1682, 1598, 1364, 1164, 1081, 748.

**Diallyl (*R*)-4-oxo-3-phenyl-5-tosyl-1,3,4,5-tetrahydro-2*H*-cyclopenta[*c*]quinoline-2,2-dicarboxylate (**3w**)**

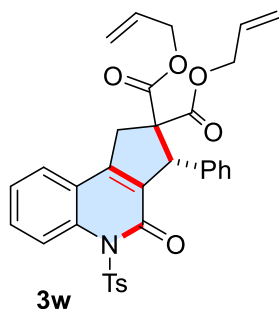

Following the general procedure, LiCl (8.5 mg, 0.2 mmol) was taken from glove box in an oven dried Schlenk tube. Then triazolium salt **4** (7.4 mg, 0.04 mmol), diallyl 2-(2-(2-((4-methylphenyl)sulfonamido)phenyl)-2-oxoethyl)malonate **1w** (94.0 mg, 0.2 mmol) and bisquinone oxidant **8** (163.4 mg, 0.4 mmol) were added to it. Then mixture of solvent toluene:benzene (4:1 ratio, 2.0 mL) was added to it under nitrogen atmosphere and kept stirring at 25 °C. Then cinnamaldehyde **2a** (52.9 mg, 50.3  $\mu$ L, 0.4 mmol) and followed by DMAP (36.7 mg, 0.3 mmol) were added to the reaction mixture and kept for stirring at 25 °C for 12 h. Then, the solvent was evaporated, and the crude mixture was purified by flash column chromatography (Pet. Ether/EtOAc- 80/20) using neutral alumina to afford diallyl (*R*)-4-oxo-3-phenyl-5-tosyl-1,3,4,5-tetrahydro-2*H*-cyclopenta[*c*]quinoline-2,2-dicarboxylate **3w** as a white solid (55 mg, 54% yield).  $R_f$ (Pet. ether /EtOAc = 70/30): 0.35; er = 94:6,  $[\alpha]_D^{22} = -64.30$  (c 1.0,  $CHCl_3$ ). **HPLC** (Chiralpak IA, hexane/IPA = 70:30, flow rate = 0.7 mL/min,  $\lambda = 254$  nm)  $t_R = 11.8$  min (minor),  $t_R = 16.6$  min (major).

**$^1H$  NMR (400 MHz,  $CDCl_3$ )**  $\delta$  8.39 (d,  $J = 8.7$  Hz, 1H), 7.85 (d,  $J = 8.2$  Hz, 2H), 7.59-7.55 (m, 2H), 7.38 (t,  $J = 7.5$  Hz, 1H), 7.19 (d,  $J = 8.1$  Hz, 2H), 7.13-7.08 (m, 3H), 6.94-6.92 (m, 2H), 5.91-5.81 (m, 1H), 5.50-5.40 (m, 1H), 5.32 – 5.21 (m, 3H), 5.10– 5.06 (m, 2H), 4.71-4.59 (m, 2H), 4.24 – 4.14 (m, 2H), 3.84-3.79 (m, 1H), 3.57 (d,  $J = 18.5$  Hz, 1H), 2.38 (s, 3H).  **$^{13}C$  NMR (100 MHz,  $CDCl_3$ )**  $\delta$  170.4, 168.1, 158.9, 150.1, 145.1, 138.3, 136.7, 136.4, 132.9, 131.3, 131.1, 130.2, 129.4, 128.8, 128.6, 128.2, 127.5, 125.5, 124.8, 120.3, 119.7, 119.3, 118.8, 66.9, 66.5, 64.9, 55.5, 39.4, 21.8. **HRMS (ESI)** m/z:  $[M+H]^+$  Calcd for  $C_{33}H_{30}NO_7S$ : 584.1737; Found: 584.1736. **FTIR** ( $cm^{-1}$ ) 2955, 2920, 1732, 1682, 1453, 1161, 1081, 752.

**Dimethyl (*R*)-5-((4-nitrophenyl)sulfonyl)-4-oxo-3-phenyl-1,3,4,5-tetrahydro-2*H*-cyclopenta[*c*]quinoline-2,2-dicarboxylate (**3x**)**

Following the general procedure, LiCl (8.5 mg, 0.2 mmol) was taken from glove box in an oven dried Schlenk tube. Then triazolium salt **4** (7.4 mg, 0.04 mmol), Dimethyl 2-(2-(2-((4-

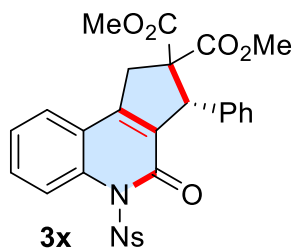

nitrophenyl) sulfonamido)phenyl)-2-oxoethyl)malonate **1x** (90.1 mg, 0.2 mmol) and bisquinone oxidant **8** (163.4 mg, 0.4 mmol) were added to it. Then mixture of solvent toluene:benzene (4:1 ratio, 2.0 mL) was added to it under nitrogen atmosphere and kept stirring at 25 °C. Then cinnamaldehyde **2a** (52.9 mg, 50.3  $\mu$ L, 0.4 mmol) and followed by DMAP (36.7 mg, 0.3 mmol) were added to the reaction mixture and kept for stirring at 25 °C for 12 h. Then, the solvent was evaporated, and the crude mixture was purified by flash column chromatography (Pet. Ether/EtOAc- 80/20) using neutral alumina to afford Dimethyl (*R*)-5-((4-nitrophenyl)sulfonyl)-4-oxo-3-phenyl-1,3,4,5-tetrahydro-2*H*-cyclopenta[*c*]quinoline-2,2-dicarboxylate **3x** as a white solid (59 mg, 52% yield).

$R_f$ (Pet. ether /EtOAc = 70/30): 0.31; er = 98:2,  $[\alpha]_D^{22} = -76.81$  (c 1.0,  $\text{CHCl}_3$ ). **HPLC** (Chiralpak IA, hexane/IPA = 80:20, flow rate = 0.7 mL/min,  $\lambda = 254$  nm)  $t_R = 28.1$  min (minor),  $t_R = 36.3$  min (major).

**$^1\text{H}$  NMR (400 MHz,  $\text{CDCl}_3$ )**  $\delta$  8.37 (d,  $J = 8.6$  Hz, 1H), 8.17 (d,  $J = 8.6$  Hz, 2H), 8.03 (d,  $J = 8.6$  Hz, 2H), 7.64-7.60 (m, 2H), 7.45 (t,  $J = 7.5$  Hz, 1H), 7.07 (d,  $J = 4.3$  Hz, 3H), 6.86 (d,  $J = 4.1$  Hz, 2H), 5.19 (s, 1H), 4.23 (d,  $J = 18.7$  Hz, 1H), 3.76 (s, 3H), 3.57 (d,  $J = 18.7$  Hz, 1H), 3.14 (s, 3H).  **$^{13}\text{C}$  NMR (100 MHz,  $\text{CDCl}_3$ )**  $\delta$  171.2, 168.7, 158.6, 150.9, 150.5, 144.8, 137.8, 136.6, 132.7, 130.6, 130.0, 128.4, 128.2, 127.7, 125.9, 125.5, 123.9, 120.1, 119.8, 64.7, 55.4, 53.6, 52.6, 39.5. **HRMS (ESI)**  $m/z$ :  $[\text{M}+\text{H}]^+$  Calcd for  $\text{C}_{28}\text{H}_{23}\text{N}_2\text{O}_9\text{S}$ : 563.1119; Found: 563.1139. **FTIR ( $\text{cm}^{-1}$ )** 2955, 2924, 2363, 1732, 1679, 1532, 1177, 751.

### Dimethyl (*R*)-5-(methylsulfonyl)-4-oxo-3-phenyl-1,3,4,5-tetrahydro-2*H*-cyclopenta[*c*]quinoline-2,2-dicarboxylate (**3y**)

Following the general procedure, LiCl (8.5 mg, 0.2 mmol) was taken from glove box in an oven dried Schlenk tube. Then triazolium salt **4** (7.4 mg, 0.04 mmol), dimethyl 2-(2-(2-(methylsulfonyl)phenyl)-2-oxoethyl)malonate **1y** (69.0 mg, 0.2 mmol) and bisquinone oxidant **8** (163.4 mg, 0.4 mmol) were added to it. Then mixture of solvent toluene:benzene (4:1 ratio, 2.0 mL) was added to it under nitrogen atmosphere and kept stirring at 25 °C. Then cinnamaldehyde **2a** (52.9 mg, 50.3  $\mu$ L, 0.4 mmol) and followed by DMAP (36.7 mg, 0.3 mmol) were added to the reaction mixture and kept for stirring at 25 °C for 12 h. Then, the solvent was evaporated, and the crude mixture was purified by flash column chromatography (Pet. Ether/EtOAc- 80/20) using neutral alumina to afford dimethyl(*R*)-5-

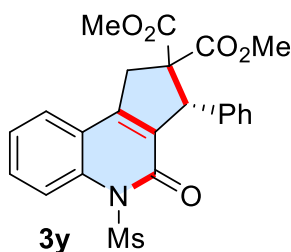

(methylsulfonyl)-4-oxo-3-phenyl-1,3,4,5-tetrahydro-2*H*-cyclopenta[*c*]quinoline-2,2-dicarboxylate **3y** as a white solid (36.4 mg, 40% yield).

$R_f$  (Pet. ether /EtOAc = 70/30): 0.34; er = 99:1,  $[\alpha]_D^{22} = -127.18$  (c 1.0, CHCl<sub>3</sub>). **HPLC** (Chiralpak IA, hexane/IPA = 70:30, flow rate = 0.7 mL/min,  $\lambda = 254$  nm)  $t_R = 13.6$  min (major),  $t_R = 17.7$  min (minor).

**<sup>1</sup>H NMR (400 MHz, CDCl<sub>3</sub>)**  $\delta$  8.28 (d,  $J = 8.7$  Hz, 1H), 7.59-7.52 (m, 2H), 7.38 (t,  $J = 7.5$  Hz, 1H), 7.24-7.20 (m, 3H), 7.09 (d,  $J = 7.2$  Hz, 2H), 5.44 (s, 1H), 4.28 (d,  $J = 18.6$  Hz, 1H), 3.80 (s, 3H), 3.62-3.57 (m, 4H), 3.21 (s, 3H). **<sup>13</sup>C NMR (100 MHz, CDCl<sub>3</sub>)**  $\delta$  171.3, 168.8, 160.2, 150.8, 137.9, 137.0, 132.6, 130.5, 128.6, 128.4, 127.9, 125.7, 124.8, 119.7, 119.5, 64.9, 55.8, 53.6, 52.6, 45.2, 39.4. **HRMS (ESI)**  $m/z$ :  $[M+H]^+$  Calcd for C<sub>23</sub>H<sub>22</sub>NO<sub>7</sub>S: 456.1111; Found: 456.1130. **FTIR (cm<sup>-1</sup>)** 2954, 2927, 1732, 1676, 1361, 1261, 909, 729.

### Dimethyl (*R*)-4-oxo-3-phenyl-5-tosyl-1,3,4,5-tetrahydro-2*H*-cyclopenta[*c*][1,3]dioxolo [4,5-*g*]quinoline-2,2-dicarboxylate (**3z**)

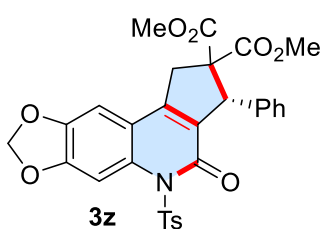

Following the general procedure, LiCl (8.5 mg, 0.2 mmol) was taken from glove box in an oven dried Schlenk tube. Then triazolium salt **4** (7.4 mg, 0.04 mmol), dimethyl 2-(2-(6-((4-methylphenyl)sulfonamido)benzo[*d*][1,3]dioxol-5-yl)-2-oxoethyl)malonate **1z** (92.7 mg, 0.2 mmol) and bisquinone oxidant **8** (163.4 mg, 0.4 mmol) were added to it. Then mixture of solvent toluene:benzene (4:1 ratio, 2.0 mL) was added to it under nitrogen atmosphere and kept stirring at 25 °C. Then cinnamaldehyde **2a** (52.9 mg, 50.3  $\mu$ L, 0.4 mmol) and followed by DMAP (36.7 mg, 0.3 mmol) were added to the reaction mixture and kept for stirring at 25 °C for 12 h. Then, the solvent was evaporated, and the crude mixture was purified by flash column chromatography (Pet. Ether/EtOAc- 80/20) using neutral alumina to afford dimethyl (*R*)-4-oxo-3-phenyl-5-tosyl-1,3,4,5-tetrahydro-2*H*-cyclopenta[*c*][1,3]dioxolo[4,5-*g*]quinoline-2,2-dicarboxylate **3z** as a white solid (40.3 mg, 35% yield).

$R_f$  (Pet. ether /EtOAc = 70/30): 0.30; er = 98:2,  $[\alpha]_D^{22} = -81.24$  (c 1.0, CHCl<sub>3</sub>). **HPLC** (Chiralpak IA, hexane/IPA = 70:30, flow rate = 0.7 mL/min,  $\lambda = 254$  nm)  $t_R = 22.6$  min (major),  $t_R = 27.9$  min (minor).

**<sup>1</sup>H NMR (400 MHz, CDCl<sub>3</sub>)**  $\delta$  7.96 – 7.80 (m, 3H), 7.19 – 7.10 (m, 5H), 6.91-6.89 (m, 3H), 6.09 (s, 2H), 5.22 (s, 1H), 4.11 (d,  $J = 18.3$  Hz, 1H), 3.76 (s, 3H), 3.45 (d,  $J = 18.3$  Hz, 1H), 3.15 (s, 3H), 2.37 (s, 3H). **<sup>13</sup>C NMR (100 MHz, CDCl<sub>3</sub>)**  $\delta$  171.3, 168.9, 158.9, 150.2, 150.1, 145.1,

145.0, 136.9, 136.4, 134.7, 130.1, 129.4, 128.8, 128.5, 128.2, 127.4, 114.3, 103.4, 102.4, 102.0, 64.9, 55.4, 53.5, 52.5, 39.6, 21.8. **HRMS (ESI)** m/z: [M+H]<sup>+</sup> Calcd for C<sub>30</sub>H<sub>26</sub>NO<sub>9</sub>S: 576.1323; Found: 576.1342. **FTIR (cm<sup>-1</sup>)** 2954, 2922, 2853, 1733, 1677, 1595, 1451, 1254, 1167, 1037, 754.

**Dimethyl-(*R*)-8-chloro-4-oxo-3-phenyl-5-tosyl-1,3,4,5-tetrahydro-2*H*-cyclopenta[*c*]quinoline-2,2-dicarboxylate (3aa)**

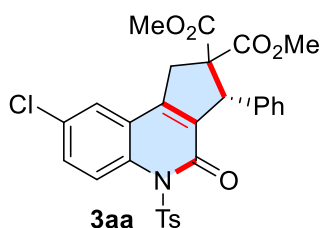

Following the general procedure, LiCl (8.5 mg, 0.2 mmol) was taken from glove box in an oven dried Schlenk tube. Then triazolium salt **4** (7.4 mg, 0.04 mmol), dimethyl 2-(2-(5-chloro-2-((4-methylphenyl)sulfonamido)phenyl)-2-oxoethyl)malonate **1aa** (90.0 mg, 0.2 mmol) and bisquinone oxidant **8** (163.4 mg, 0.4 mmol) were added to it. Then mixture of solvent toluene:benzene (4:1 ratio, 2.0 mL) was added to it under nitrogen atmosphere and kept stirring at 25 °C. Then cinnamaldehyde **2a** (52.9 mg, 50.3 μL, 0.4 mmol) and followed by DMAP (36.7 mg, 0.3 mmol) were added to the reaction mixture and kept for stirring at 25 °C for 12 h. Then, the solvent was evaporated, and the crude mixture was purified by flash column chromatography (Pet. Ether/EtOAc- 80/20) using neutral alumina to afford dimethyl (*R*)-8-chloro-4-oxo-3-phenyl-5-tosyl-1,3,4,5-tetrahydro-2*H*-cyclopenta[*c*]quinoline-2,2-dicarboxylate **3aa** as a white solid (85 mg, 75% yield).

*R<sub>f</sub>* (Pet. ether /EtOAc = 70/30): 0.38; er = >99:1, [α]<sub>D</sub><sup>22</sup> = -99.37 (c 1.0, CHCl<sub>3</sub>). **HPLC** (Chiralpak IA, hexane/IPA = 70:30, flow rate = 0.7 mL/min, λ = 254 nm) t<sub>R</sub> = 12.3 min (minor), t<sub>R</sub> = 13.4 min (major).

**<sup>1</sup>H NMR (400 MHz, CDCl<sub>3</sub>)** δ 8.34 (d, *J* = 9.5 Hz, 1H), 7.82 (d, *J* = 8.1 Hz, 2H), 7.52-7.50 (m, 2H), 7.20-7.10 (m, 5H), 6.89 (d, *J* = 6.5 Hz, 2H), 5.26 (s, 1H), 4.17 (d, *J* = 18.5 Hz, 1H), 3.77 (s, 3H), 3.51 (d, *J* = 18.5 Hz, 1H), 3.15 (s, 3H), 2.38 (s, 3H). **<sup>13</sup>C NMR (100 MHz, CDCl<sub>3</sub>)** δ 171.1, 168.7, 158.4, 149.0, 145.4, 136.6, 136.4, 136.0, 134.0, 130.4, 130.0, 129.5, 128.8, 128.4, 128.2, 127.5, 124.9, 121.6, 121.0, 64.8, 55.6, 53.6, 52.5, 39.2, 21.8. **HRMS (ESI)** m/z: [M+Na]<sup>+</sup> Calcd for C<sub>29</sub>H<sub>24</sub>ClNO<sub>7</sub>SNa: 588.0860; Found: 588.0861. **FTIR (cm<sup>-1</sup>)** 3028, 2954, 1733, 1683, 1365, 1160, 1081, 752.

**Dimethyl (*R*)-8-methyl-4-oxo-3-phenyl-5-tosyl-1,3,4,5-tetrahydro-2*H*-cyclopenta[*c*]quinoline-2,2-dicarboxylate (3ab)**

Following the general procedure, LiCl (8.5 mg, 0.2 mmol) was taken from glove box in an oven



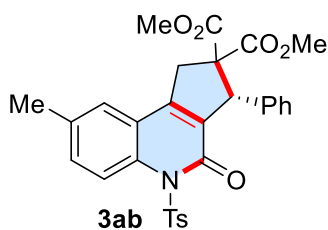

dried Schlenk tube. Then triazolium salt **4** (7.4 mg, 0.04 mmol), dimethyl 2-(2-(5-methyl-2-((4-methylphenyl)sulfonamido)phenyl)-2-oxoethyl)malonate **1ab** (87.0 mg, 0.2 mmol) and bisquinone oxidant **8** (163.4 mg, 0.4 mmol) were added to it. Then mixture of solvent toluene:benzene (4:1 ratio, 2.0 mL) was added to it under nitrogen atmosphere and kept stirring at 25 °C. Then cinnamaldehyde **2a** (52.9 mg, 50.3 μL, 0.4 mmol) and followed by DMAP (36.7 mg, 0.3 mmol) were added to the reaction mixture and kept for stirring at 25 °C for 12 h. Then, the solvent was evaporated, and the crude mixture was purified by flash column chromatography (Pet. Ether/EtOAc- 80/20) using neutral alumina to afford dimethyl (*R*)-8-methyl-4-oxo-3-phenyl-5-tosyl-1,3,4,5-tetrahydro-2*H*-cyclopenta[*c*]quinoline-2,2-dicarboxylate **3ab** as a white solid (43.6 mg, 40% yield).

$R_f$  (Pet. ether /EtOAc = 70/30): 0.33; er = >99:1,  $[\alpha]_D^{22} = -79.74$  (c 1.0, CHCl<sub>3</sub>). **HPLC** (Chiralpak IA, hexane/IPA = 70:30, flow rate = 0.7 mL/min,  $\lambda = 254$  nm)  $t_R = 11.4$  min (minor),  $t_R = 12.5$  min (major).

**<sup>1</sup>H NMR (400 MHz, CDCl<sub>3</sub>)**  $\delta$  8.28 (d,  $J = 8.8$  Hz, 1H), 7.84 (d,  $J = 8.4$  Hz, 2H), 7.40 – 7.35 (m, 2H), 7.19 (d,  $J = 8.1$  Hz, 2H), 7.12 – 7.10 (m, 3H), 6.92–6.89 (m, 2H), 5.25 (d,  $J = 1.3$  Hz, 1H), 4.17 (dd,  $J_1 = 18.5$  Hz,  $J_2 = 1.7$  Hz, 1H), 3.76 (s, 3H), 3.54 (d,  $J = 18.5$  Hz, 1H), 3.16 (s, 3H), 2.46 (s, 3H), 2.38 (s, 3H). **<sup>13</sup>C NMR (100 MHz, CDCl<sub>3</sub>)**  $\delta$  171.4, 168.9, 158.9, 150.2, 145.0, 136.8, 136.5, 136.2, 134.6, 132.6, 131.3, 129.4, 128.8, 128.5, 128.2, 127.5, 125.5, 120.1, 119.7, 65.0, 55.5, 53.5, 52.5, 39.3, 21.8, 20.9. **HRMS (ESI)**  $m/z$ :  $[M+Na]^+$  Calcd for C<sub>30</sub>H<sub>27</sub>NO<sub>7</sub>SNa: 568.1400; Found: 568.1406. **FTIR (cm<sup>-1</sup>)** 2954, 2923, 2854, 1733, 1680, 1363, 1162, 1081, 753.

#### Dimethyl (3*S*,3*aR*,9*bR*)-3*a*,9*b*-dihydroxy-4-oxo-3-phenyl-5-tosyl-1,3,3*a*,4,5,9*b*-hexahydro-2*H*-cyclopenta[*c*]quinoline-2,2-dicarboxylate (**9a**)

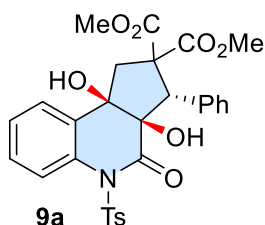

Following the literature procedure<sup>8</sup> in a 25-mL round-bottomed flask equipped with magnetic stirring bar were added NaIO<sub>4</sub> (32.1 mg, 0.15 mmol) and CeCl<sub>3</sub>·7H<sub>2</sub>O (11.5 mg, 0.04 mmol, 0.4 equiv) in 0.4 mL of H<sub>2</sub>O and gently heated until a bright yellow suspension was formed. After cooling to 0 °C, ethyl acetate (0.8 mL) and acetonitrile (0.8 mL) were added, and the suspension was stirred for 2 min. Then RuCl<sub>3</sub> (2.2 mg, 0.01 mmol) was added, and the mixture was stirred for 2 min. After that compound **3a** (0.1 mmol) was added in

<sup>8</sup> B. Plietker and M. Niggemann, *J. Org. Chem.*, 2005, **70**, 2402.



one portion and the resulting slurry was stirred until all starting material was consumed. Solid Na<sub>2</sub>SO<sub>4</sub> was added followed by ethyl acetate (6 mL). The solid was filtered off, and the filter cake was washed several times with ethyl acetate. The crude product was purified by flash chromatography (Pet. Ether/EtOAc- 50/50) using neutral alumina to afford dimethyl (3*S*,3*aR*,9*bR*)-3*a*,9*b*-dihydroxy-4-oxo-3-phenyl-5-tosyl-1,3,3*a*,4,5,9*b*-hexahydro-2*H*-cyclopenta[*c*]quinoline-2,2-dicarboxylate **9a** as a yellow solid (47.5 mg, 84% yield).

**R<sub>f</sub>**(Pet. ether /EtOAc = 70/30): 0.23; er = >99:1, [α]<sub>D</sub><sup>22</sup> = 3.52 (c 1.0, CHCl<sub>3</sub>). **HPLC** (Chiralpak IA, hexane/IPA = 70:30, flow rate = 0.7 mL/min, λ = 254 nm) t<sub>R</sub> = 27.5 min (minor), t<sub>R</sub> = 29.3 min (major).

**<sup>1</sup>H NMR (400 MHz, CDCl<sub>3</sub>)** δ 7.95 – 7.91 (m, 1H), 7.72 (d, *J* = 8.1 Hz, 2H), 7.39 (t, *J* = 7.5 Hz, 1H), 7.30-7.24 (m, 3H), 7.13 (d, *J* = 8.2 Hz, 1H), 6.99 (t, *J* = 7.3 Hz, 1H), 6.82 (t, *J* = 7.6 Hz, 2H), 6.30 (d, *J* = 7.6 Hz, 2H), 4.70 (s, 1H), 4.09 (d, *J* = 15.6 Hz, 1H), 3.77 (s, 3H), 3.18 (s, 3H), 2.94 – 2.82 (m, 3H), 2.42 (s, 3H). **<sup>13</sup>C NMR (100 MHz, CDCl<sub>3</sub>)** δ 171.7, 170.4, 169.7, 145.3, 135.9, 134.2, 133.6, 129.4, 129.3, 128.9, 128.8, 128.0, 127.8, 127.6, 127.2, 126.8, 122.8, 85.6, 78.4, 61.6, 61.1, 53.9, 52.8, 43.7, 21.8. **HRMS (ESI)** m/z: [M+Na]<sup>+</sup> Calcd for C<sub>29</sub>H<sub>27</sub>NO<sub>9</sub>SNa: 588.1299; Found: 588.1302. **FTIR (cm<sup>-1</sup>)** 3469, 2954, 2923, 2853, 1732, 1493, 1364, 1245, 1170, 1085, 753, 655.

### Dimethyl (*R*)-3-phenyl-4-(tosyloxy)-1,3-dihydro-2*H*-cyclopenta[*c*]quinoline-2,2-dicarboxylate (**10a**)

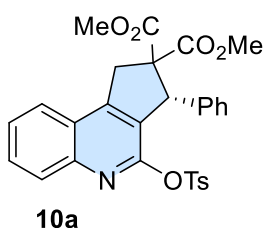

To a dry Schlenk tube containing compound **3a** (53.1 mg, 0.1 mmol) dissolved in toluene (2.5 mL) under nitrogen atmosphere. Then the reaction was allowed to stir overnight at 120 °C. After the completion of reaction, the solvent was evaporated, and the crude mixture was purified by flash column chromatography (Pet. Ether/EtOAc- 70/30) using neutral alumina to afford dimethyl (*R*)-3-phenyl-4-(tosyloxy)-1,3-dihydro-2*H*-cyclopenta[*c*]quinoline-2,2-dicarboxylate **10a** as a white solid (52.6 mg, 99% yield).

**R<sub>f</sub>**(Pet. ether /EtOAc = 70/30): 0.43; er = >99:1, [α]<sub>D</sub><sup>22</sup> = -132.22 (c 1.0, CHCl<sub>3</sub>). **HPLC** (Chiralpak IA, hexane/IPA = 70:30, flow rate = 0.7 mL/min, λ = 254 nm) t<sub>R</sub> = 11.4 min (minor), t<sub>R</sub> = 15.7 min (major).

**<sup>1</sup>H NMR (400 MHz, CDCl<sub>3</sub>)** δ 7.93 (d, *J* = 8.4 Hz, 1H), 7.81 (d, *J* = 8.1 Hz, 1H), 7.71-7.63 (m, 3H), 7.57 (t, *J* = 7.4 Hz, 1H), 7.26 – 7.19 (m, 5H), 6.95 (d, *J* = 6.6 Hz, 2H), 5.57 (s, 1H), 4.41 (d, *J* = 18.2 Hz, 1H), 3.82-3.77 (m, 4H), 3.24 (s, 3H), 2.40 (s, 3H). **<sup>13</sup>C NMR (100 MHz, CDCl<sub>3</sub>)** δ

171.5, 169.0, 152.4, 151.4, 146.2, 145.0, 137.5, 134.2, 130.1, 129.4, 129.2, 129.0, 128.4, 127.8, 127.6, 126.9, 124.5, 124.2, 66.2, 54.9, 53.6, 52.6, 38.9, 21.8. **HRMS (ESI)** m/z: [M+H]<sup>+</sup> Calcd for C<sub>29</sub>H<sub>26</sub>NO<sub>7</sub>S: 532.1424; Found: 532.1407. **FTIR (cm<sup>-1</sup>)** 2953, 2923, 2852, 1732, 1652, 1608, 1434, 1247, 1002, 750, 680.

**Dimethyl (*R*)-4-oxo-3-phenyl-1,3,4,5-tetrahydro-2*H*-cyclopenta[*c*]quinoline-2,2-dicarboxylate (**11a**)**

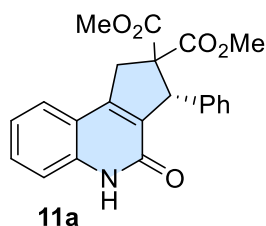

Following the literature procedure<sup>9</sup> to an oven dried schlenk containing a THF (2.5 mL) solution of **3a** (0.1 mmol) cooled at 0°C was added drop wise a solution of SmI<sub>2</sub> (0.1 M, 0.2 mmol) under nitrogen atmosphere. The resulting mixture was stirred overnight at 25 °C. Then HCl (1 M, 3.0 mL) was added, and the stirring continued for 5 min. After the mixture was extracted with CH<sub>2</sub>Cl<sub>2</sub> (3×10 mL) and washed with brine (10 mL), the organic phase was dried over Na<sub>2</sub>SO<sub>4</sub> and filtered. The solvent was removed under reduced pressure and the crude product was purified by flash chromatography (Pet. Ether/EtOAc- 60/40) using neutral alumina to afford dimethyl (*R*)-4-oxo-3-phenyl-1,3,4,5-tetrahydro-2*H*-cyclopenta[*c*]quinoline-2,2-dicarboxylate **11a** as a yellow solid (18.9 mg, 50% yield).

**R<sub>f</sub>**(Pet. ether /EtOAc = 60/40): 0.25; er = 99:1, [α]<sub>D</sub><sup>22</sup> = -117.76 (c 1.0, CHCl<sub>3</sub>). **HPLC** (Chiralcel OD-H, hexane/IPA = 60:40, flow rate = 0.7 mL/min, λ = 254 nm) t<sub>R</sub> = 9.2 min (major), t<sub>R</sub> = 11.7 min (minor).

**<sup>1</sup>H NMR (400 MHz, CDCl<sub>3</sub>)** δ 11.34 (s, 1H), 7.55 (d, *J* = 7.9 Hz, 1H), 7.40 (t, *J* = 7.7 Hz, 1H), 7.26-7.21 (m, 4H), 7.13-7.11 (m, 2H), 6.99 (d, *J* = 8.2 Hz, 1H), 5.50 (s, 1H), 4.27 (d, *J* = 18.1 Hz, 1H), 3.79 (s, 3H), 3.64 (d, *J* = 18.1 Hz, 1H), 3.23 (s, 3H). **<sup>13</sup>C NMR (100 MHz, CDCl<sub>3</sub>)** δ 171.7, 169.2, 161.1, 149.5, 139.2, 137.8, 132.6, 130.5, 128.9, 128.3, 127.6, 124.7, 122.7, 117.8, 116.5, 65.4, 55.4, 53.5, 52.5, 39.2. **HRMS (ESI)** m/z: [M+H]<sup>+</sup> Calcd for C<sub>22</sub>H<sub>20</sub>NO<sub>5</sub>S: 378.1336; Found: 378.1348. **FTIR (cm<sup>-1</sup>)** 2954, 2920, 2852, 1731, 1654, 1570, 1437, 1260, 1153, 803, 752.

<sup>9</sup> S. Zhang, C. Lin, C. Liu and D. Du, *J. Org. Chem.*, 2022, **87**, 10441.

## 8. $^1\text{H}$ and $^{13}\text{C}$ NMR Spectra of 2'-Aminomalonate Derivatives

### Dimethyl 2-(2-(2-((4-methylphenyl)sulfonamido)phenyl)-2-oxoethyl)malonate (1a)

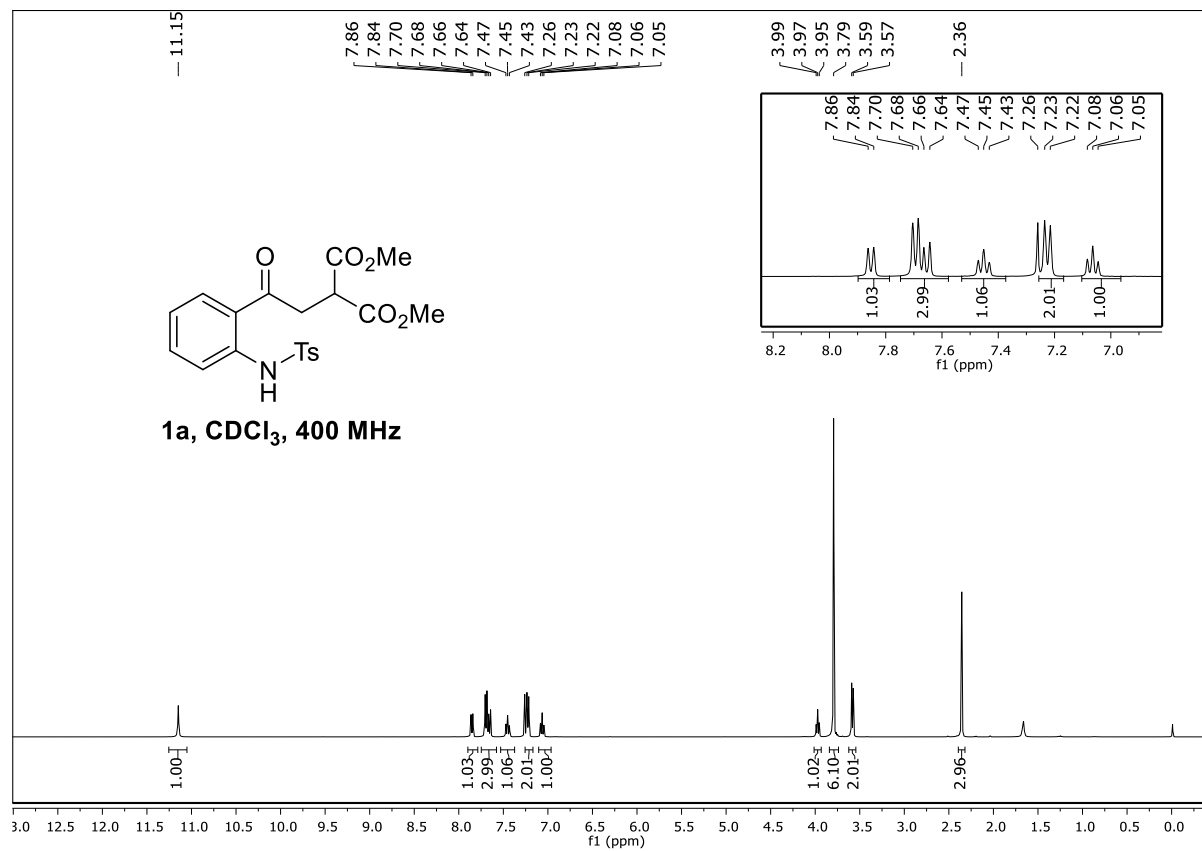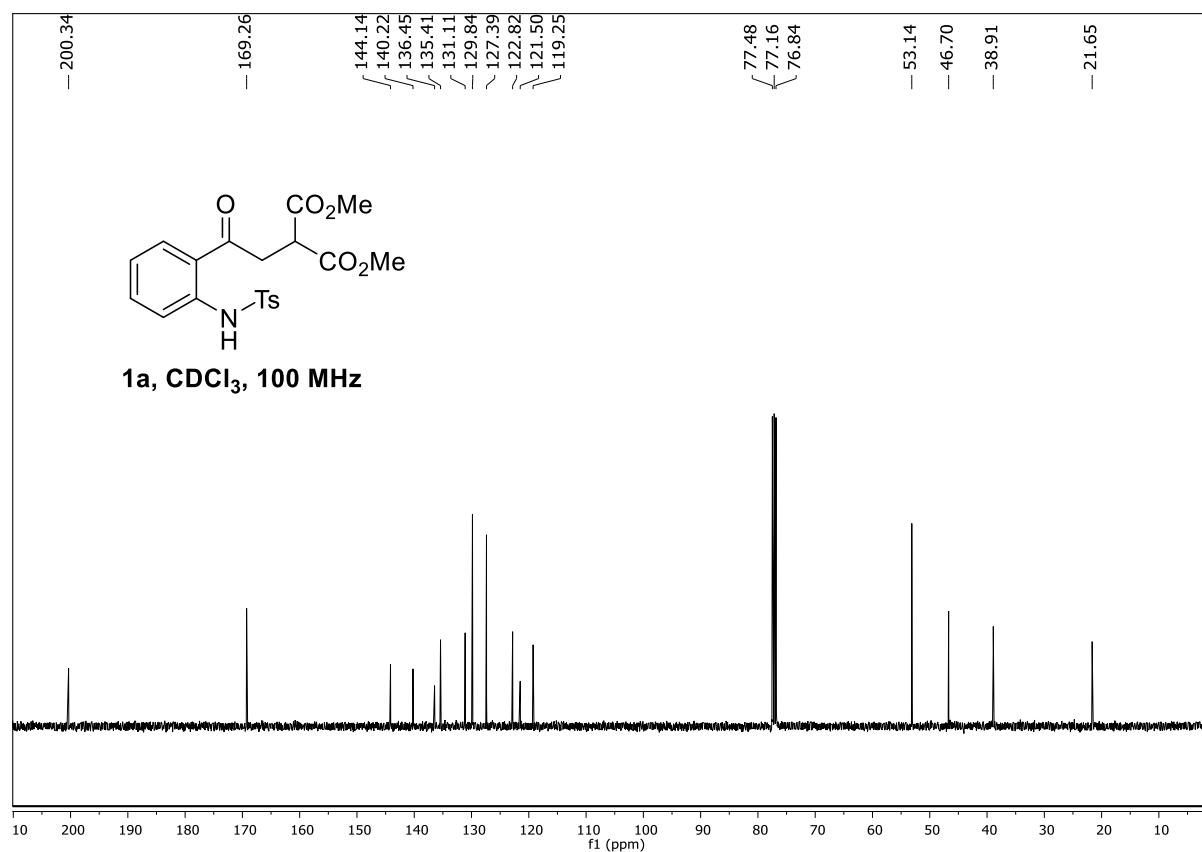

# Diethyl 2-(2-((4-methylphenyl)sulfonamido)phenyl)-2-oxoethylmalonate (1t)

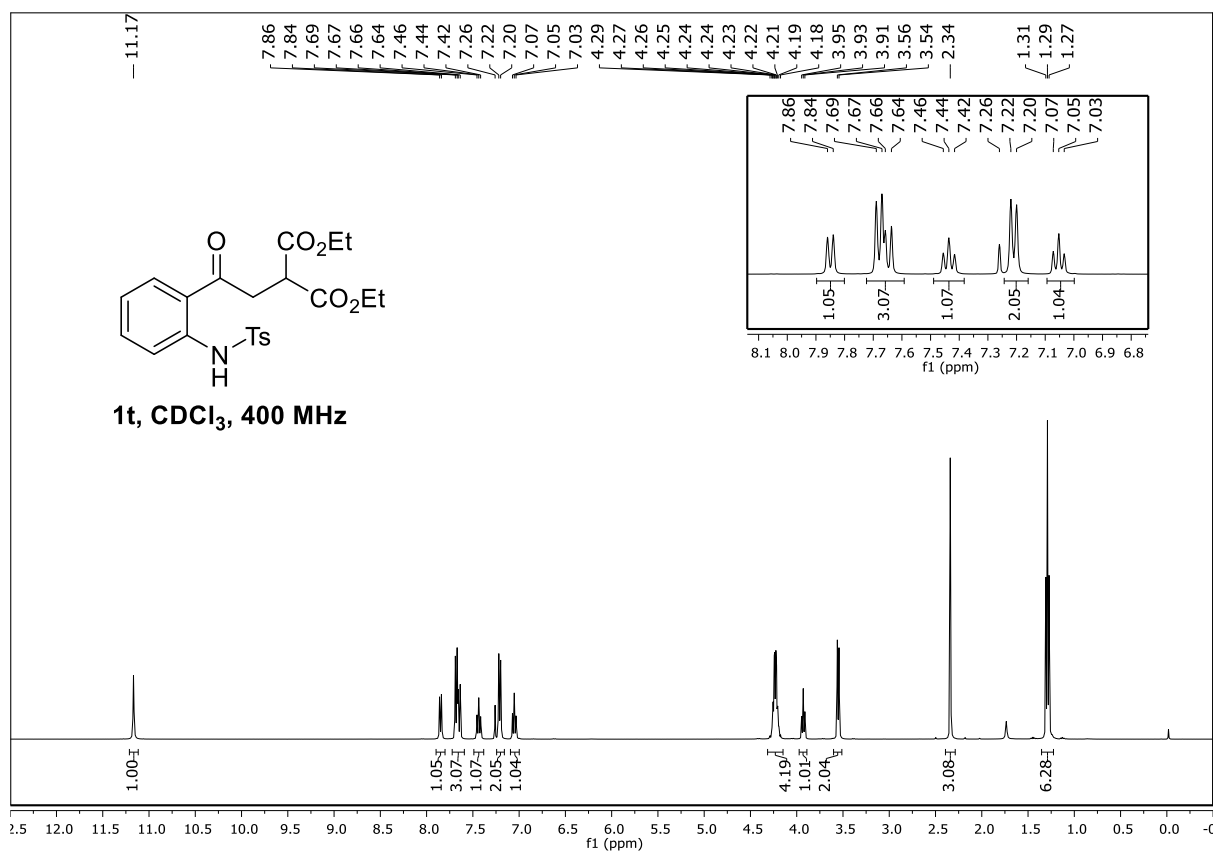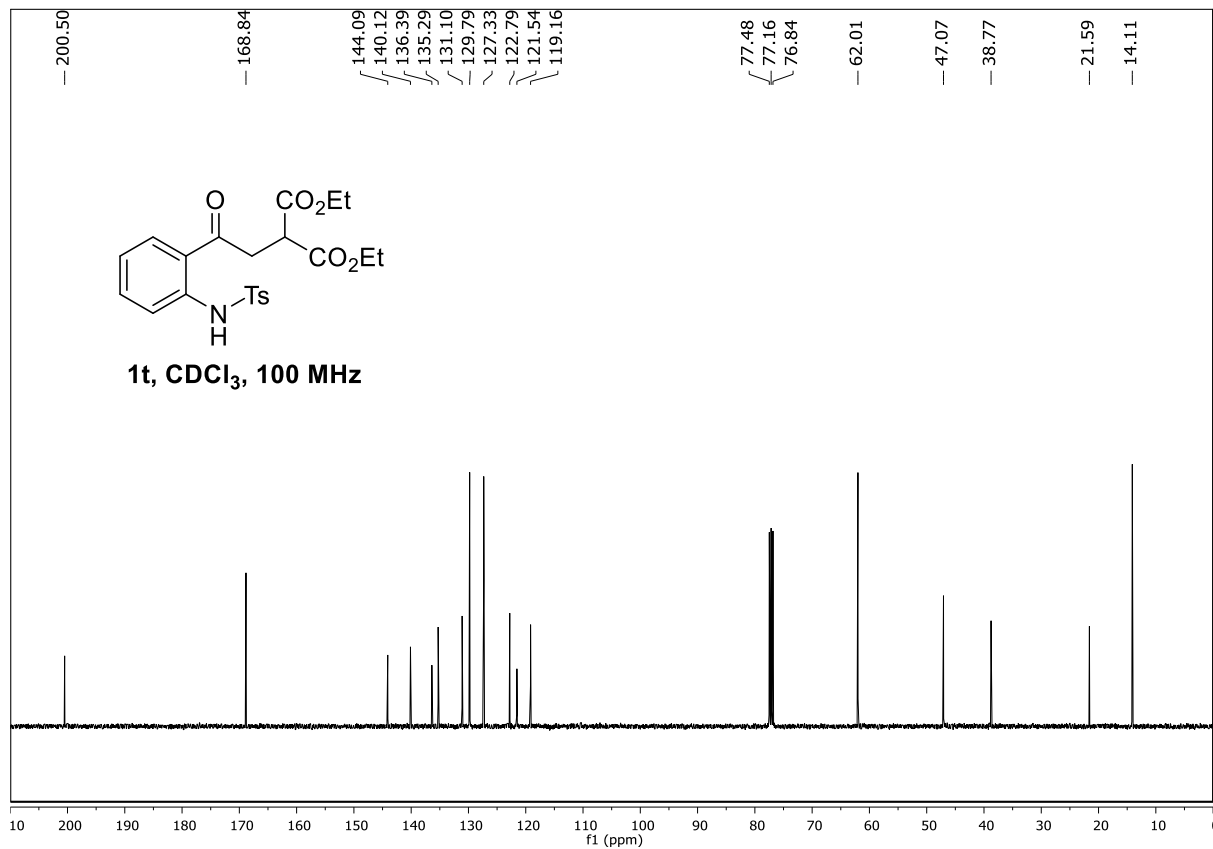

# Diisopropyl 2-(2-(2-((4-methylphenyl)sulfonamido)phenyl)-2-oxoethyl)malonate (**1u**)

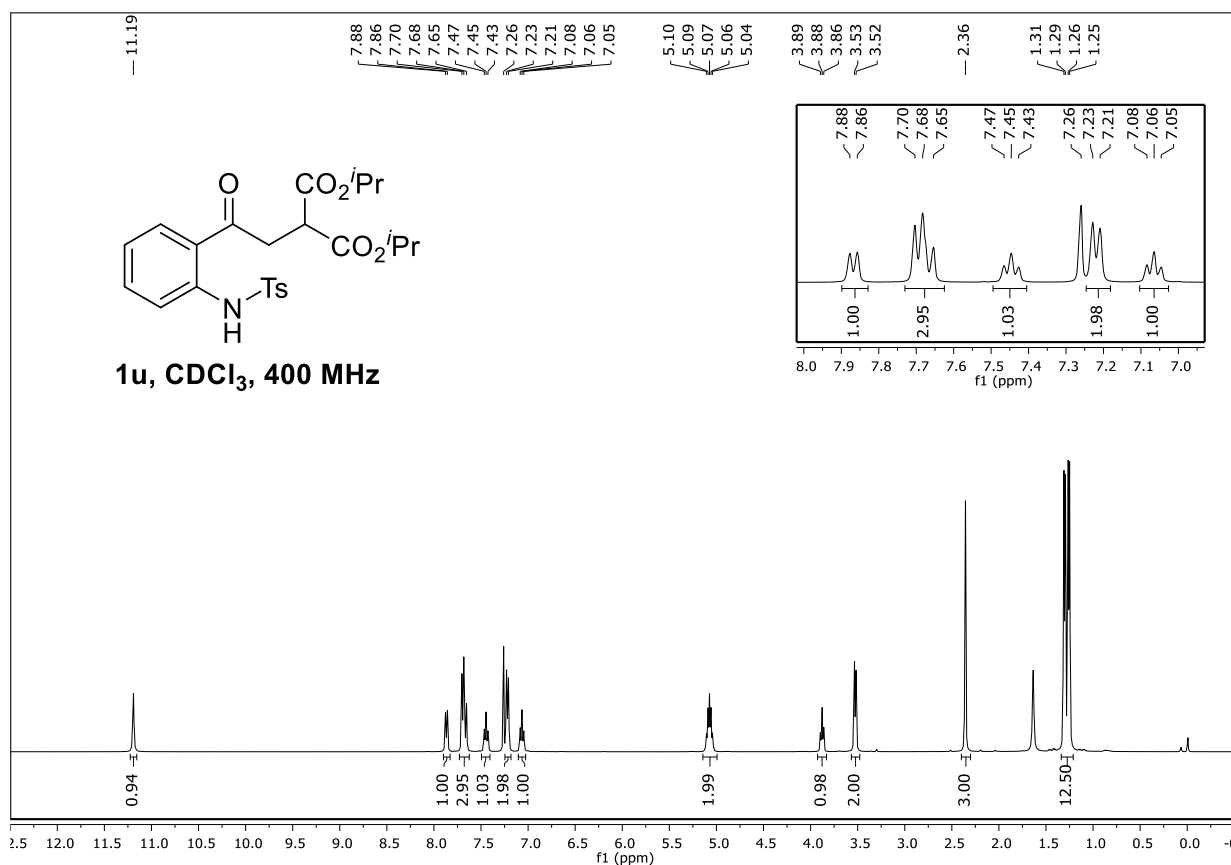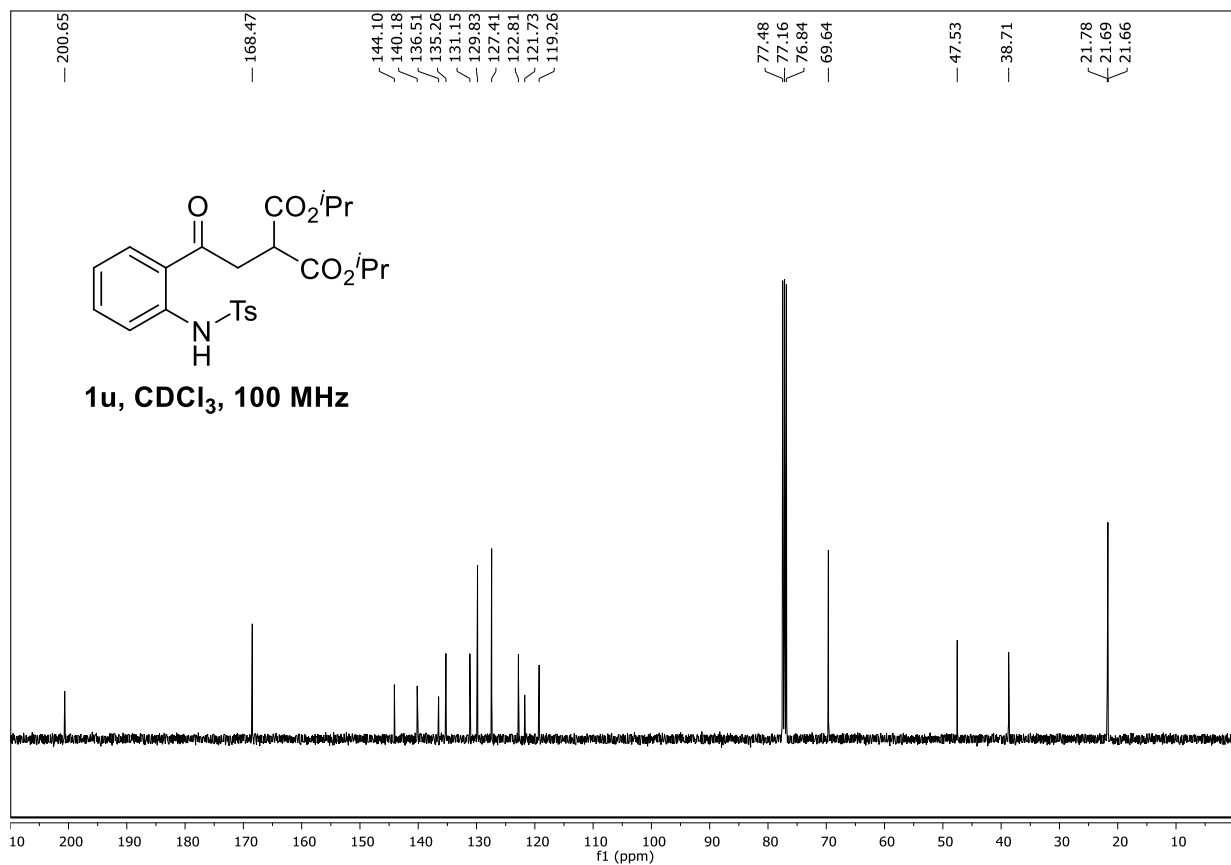

**Dibenzyl 2-(2-(2-((4-methylphenyl)sulfonamido)phenyl)-2-oxoethyl)malonate (1v)**

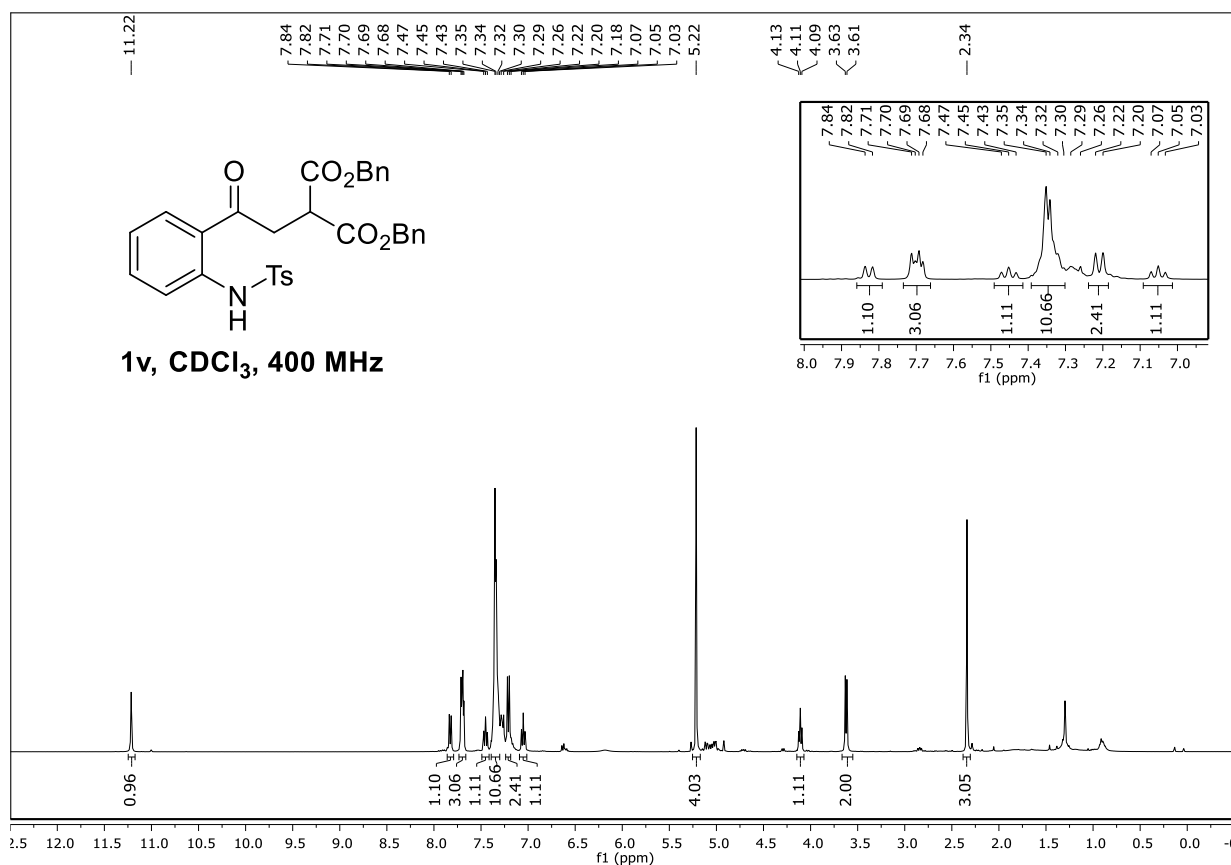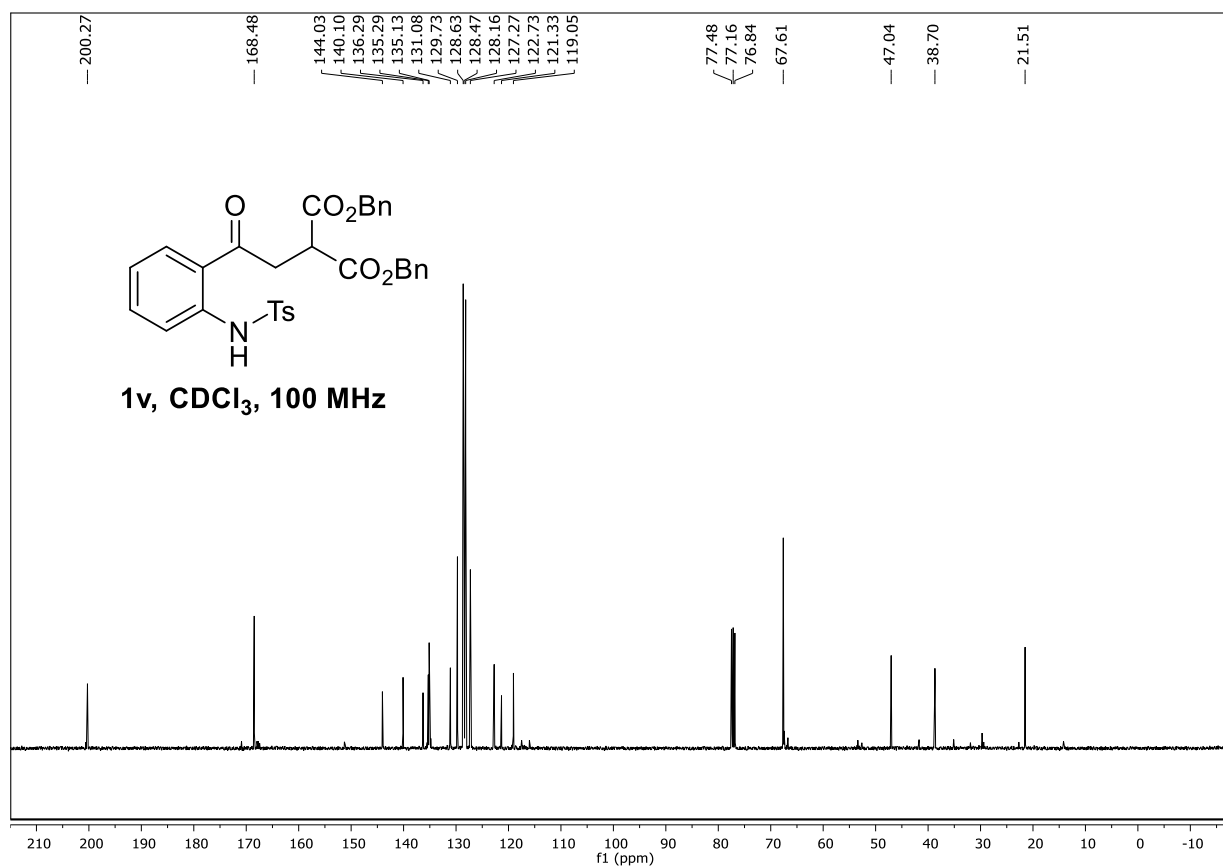

# Diallyl 2-(2-(2-((4-methylphenyl)sulfonamido)phenyl)-2-oxoethyl)malonate (1w)

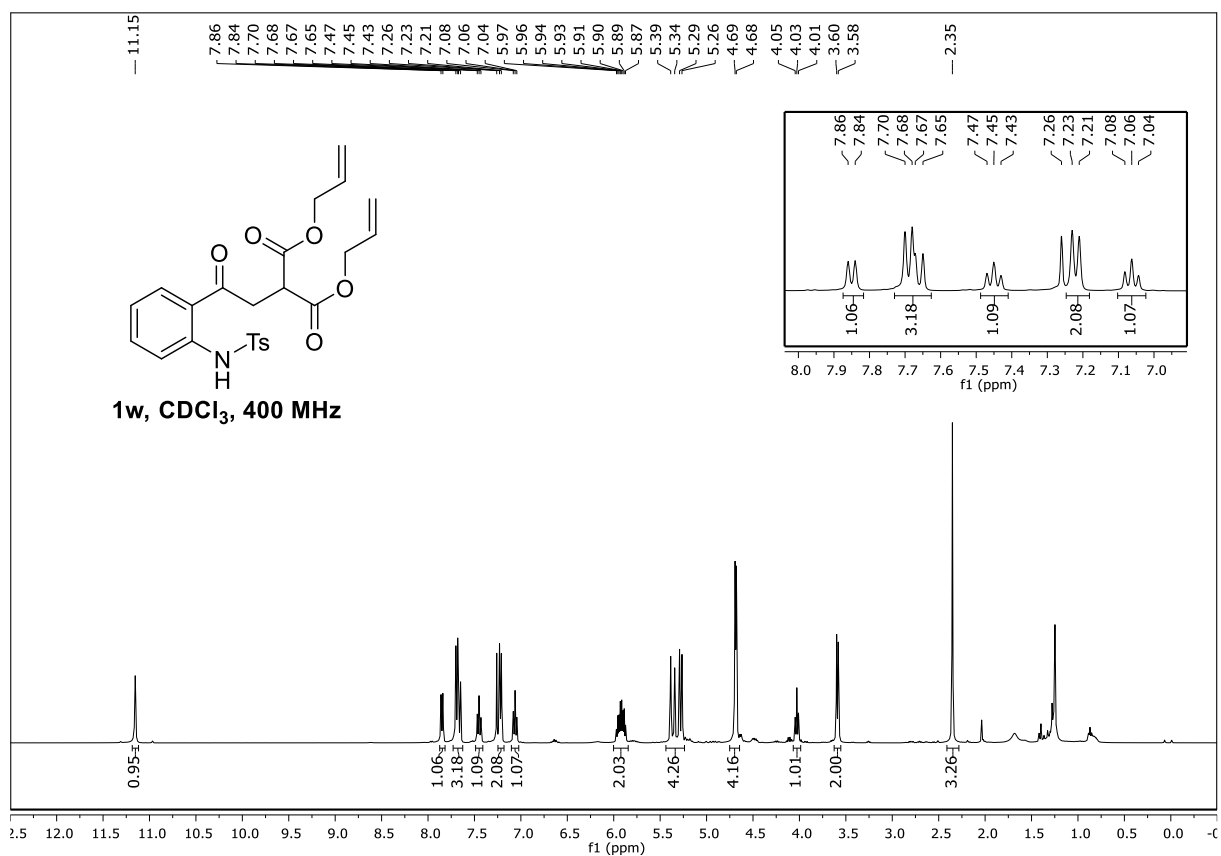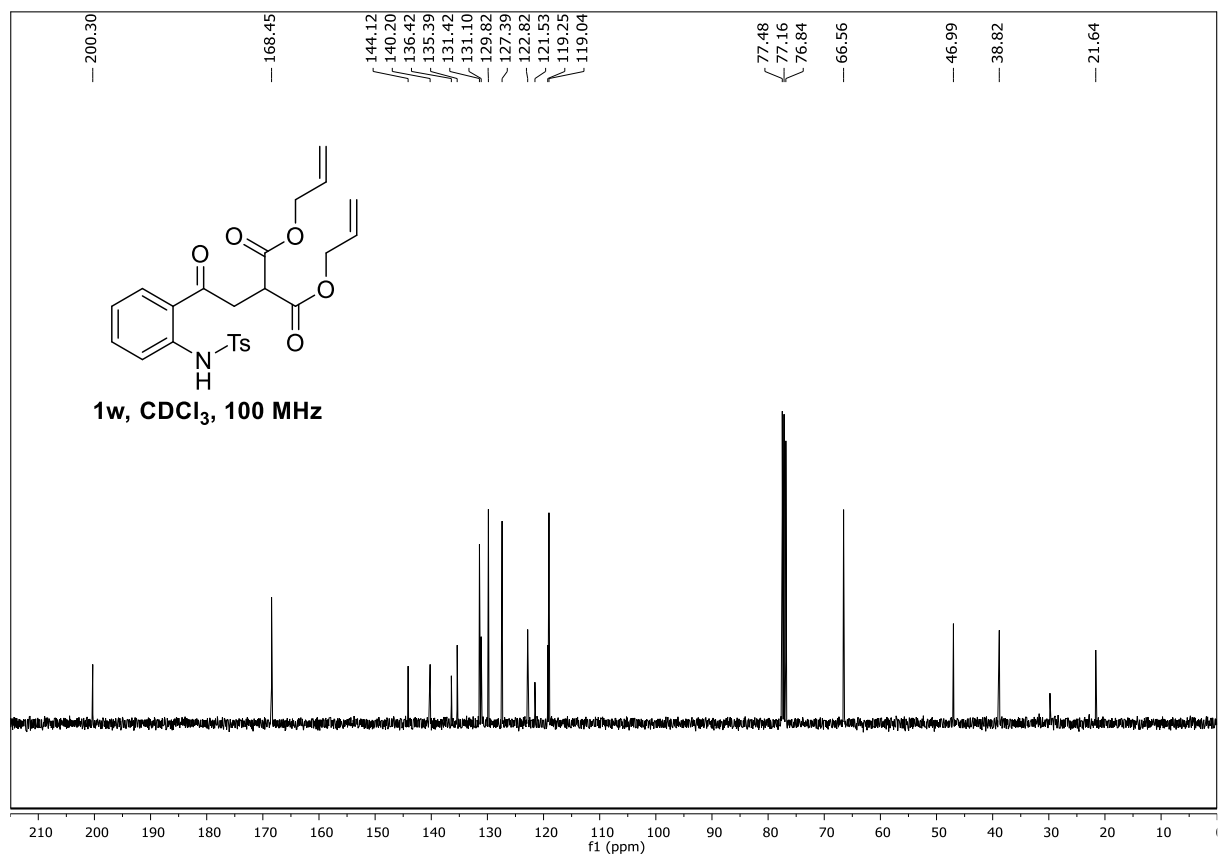

# Dimethyl 2-(2-(2-((4-nitrophenyl)sulfonamido)phenyl)-2-oxoethyl)malonate (1x)

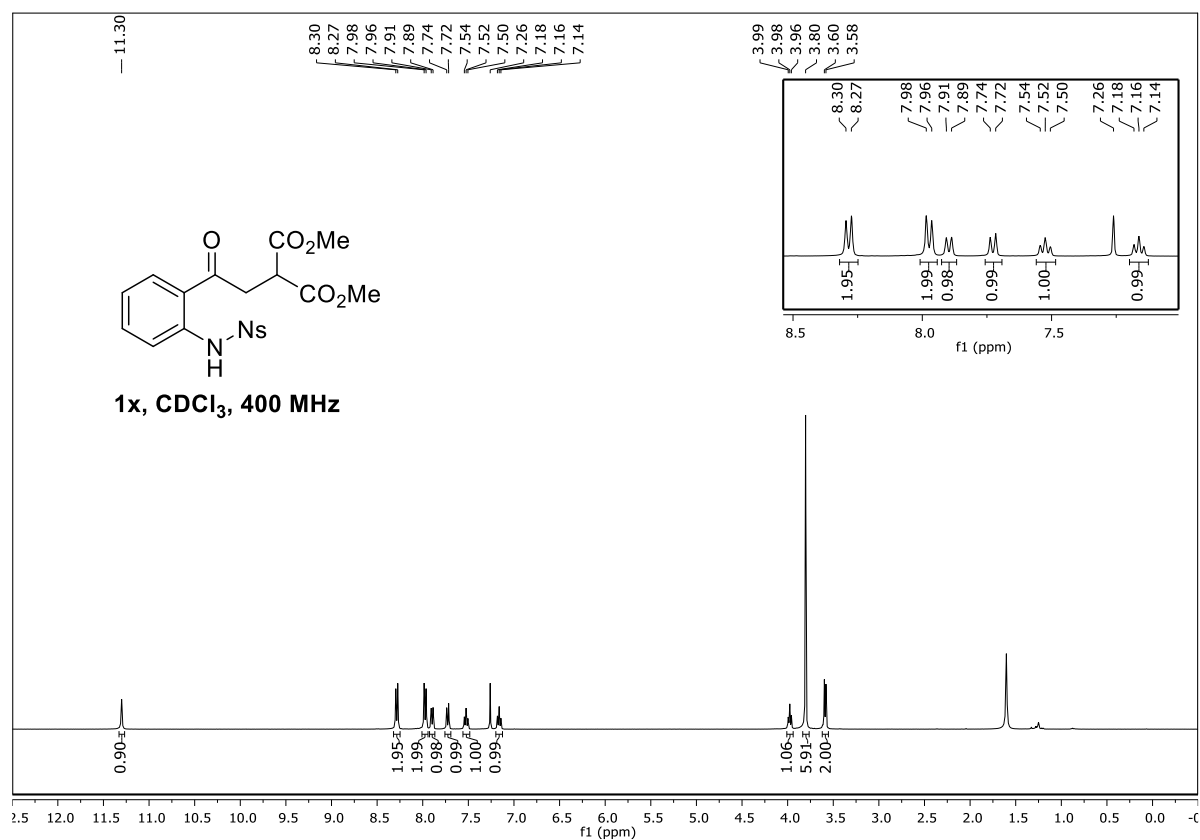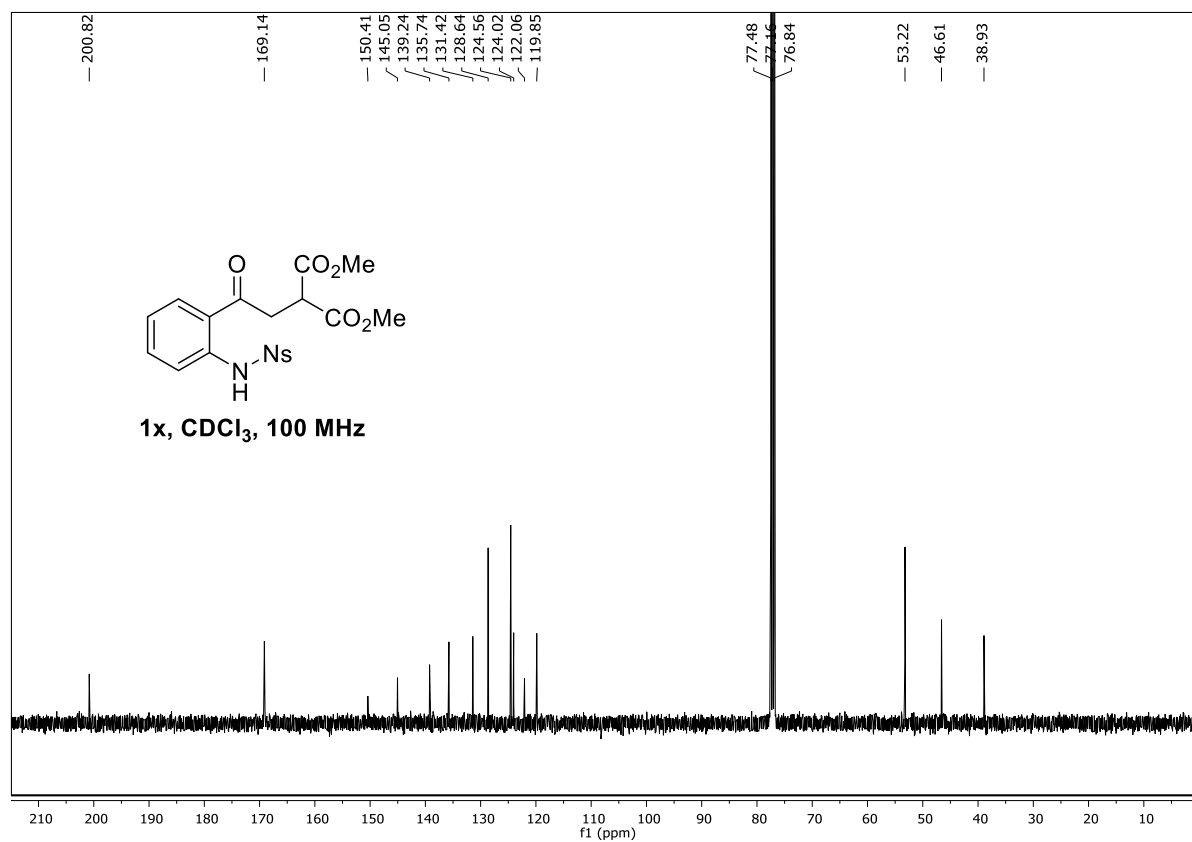



# Dimethyl 2-(2-(2-(methylsulfonamido)phenyl)-2-oxoethyl)malonate (1y)

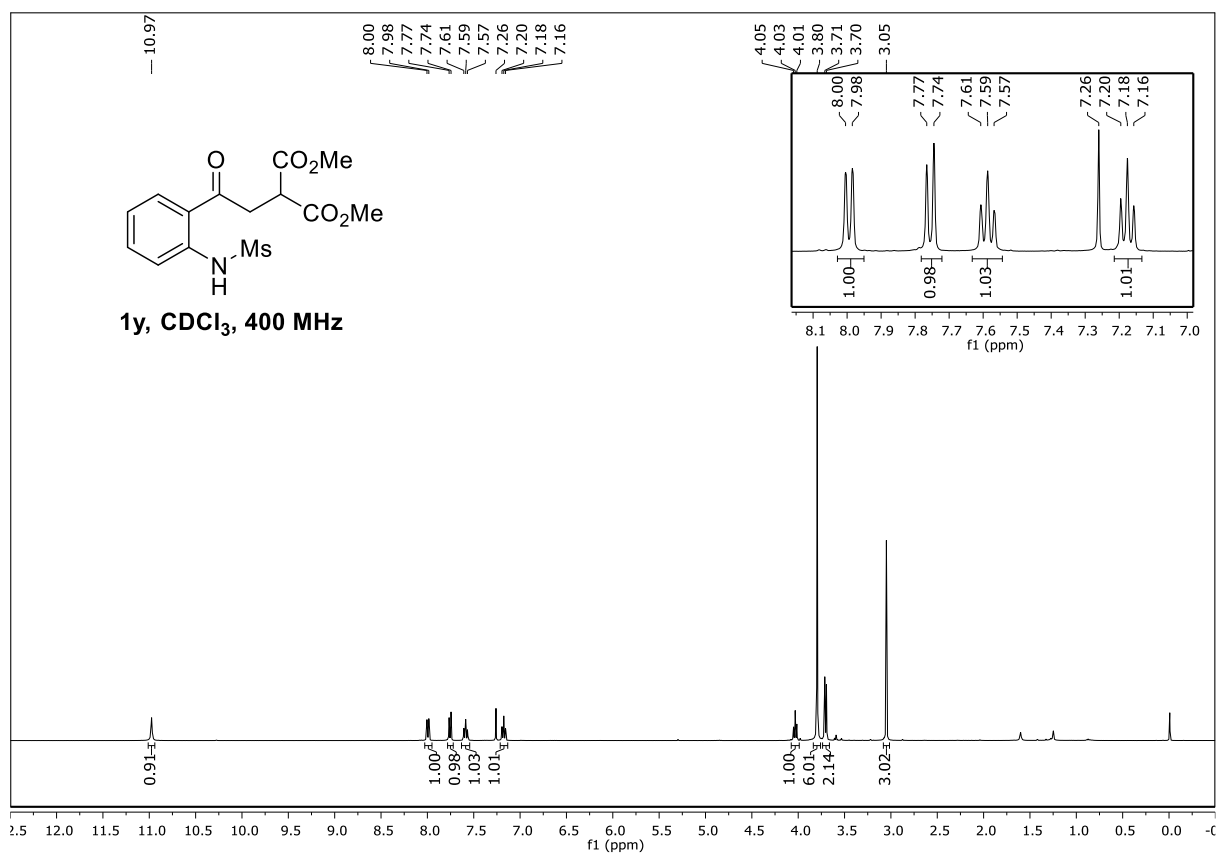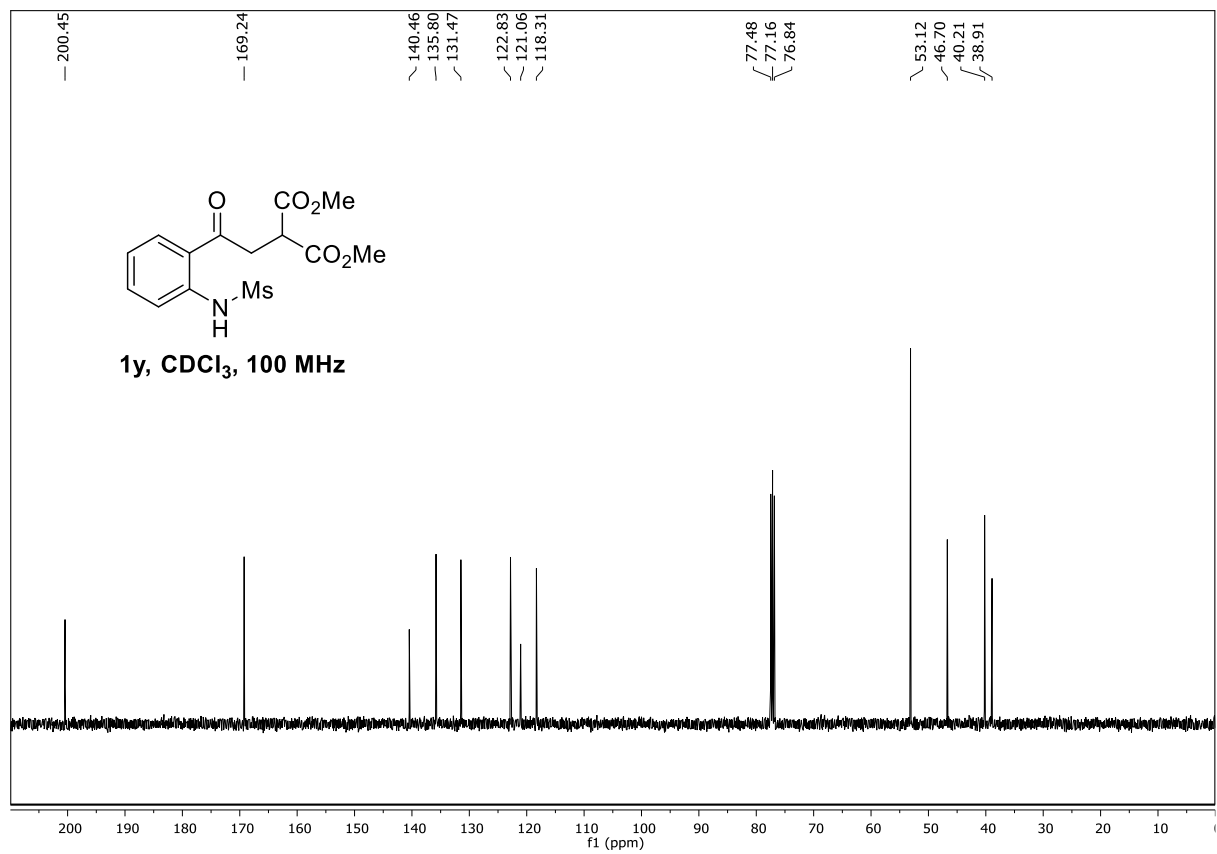

**Dimethyl 2-(2-(6-((4-methylphenyl)sulfonamido)benzo[d][1,3]dioxol-5-yl)-2-oxoethyl)malonate (1z)**

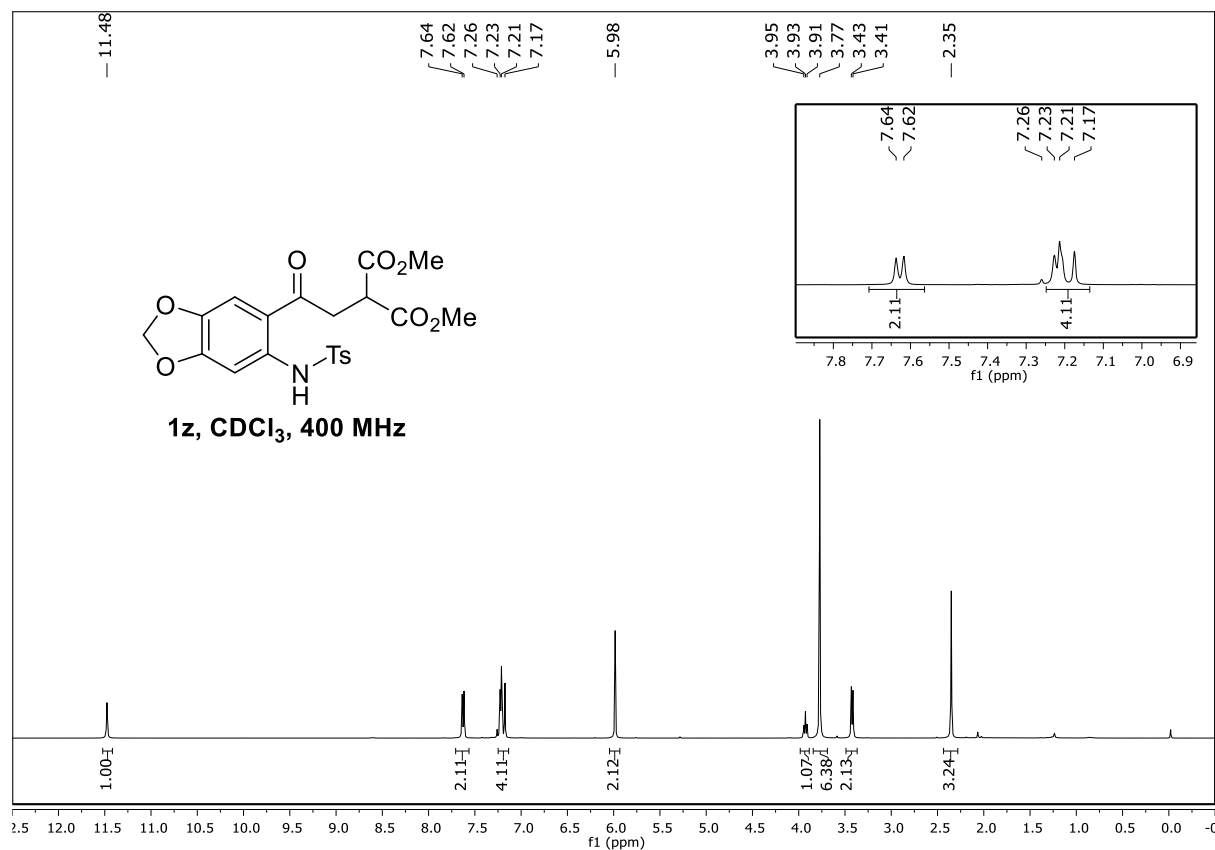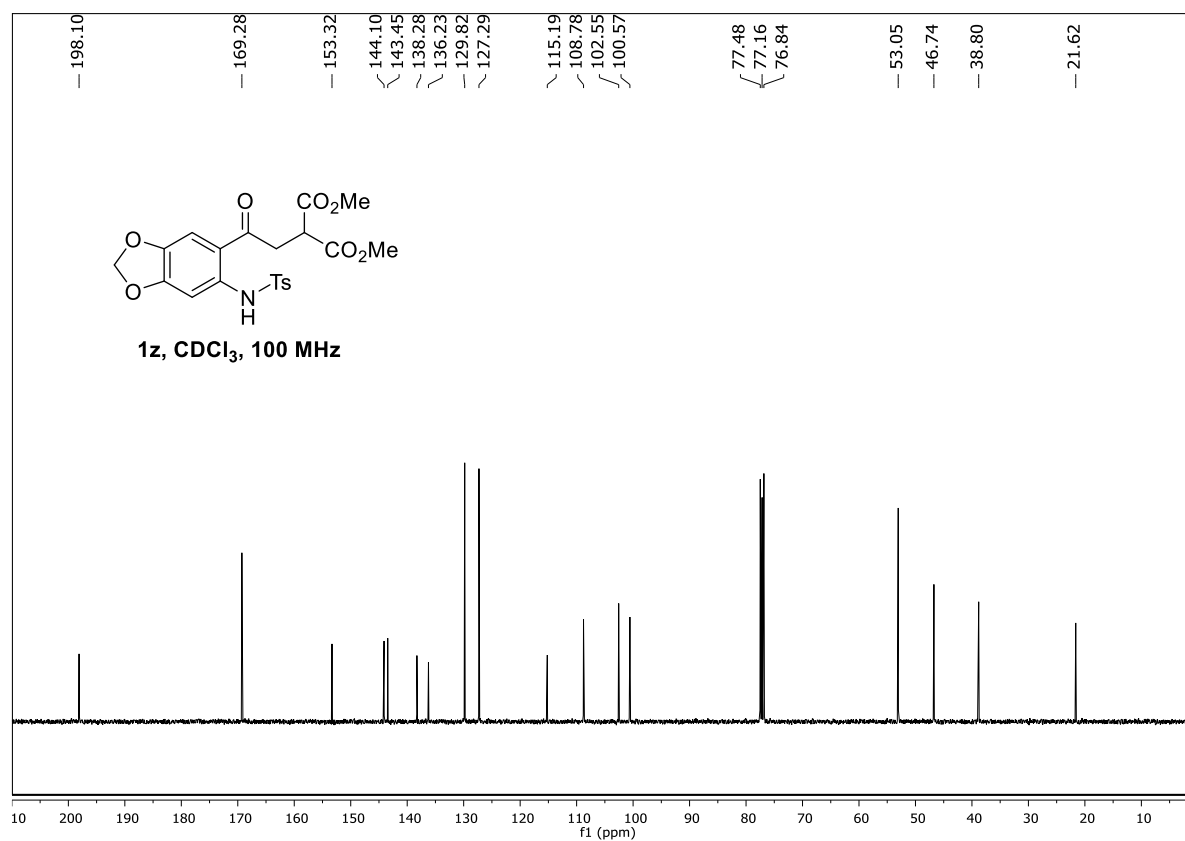

**Dimethyl 2-(2-(5-chloro-2-((4-methylphenyl)sulfonamido)phenyl)-2-oxoethyl)malonate (1aa)**

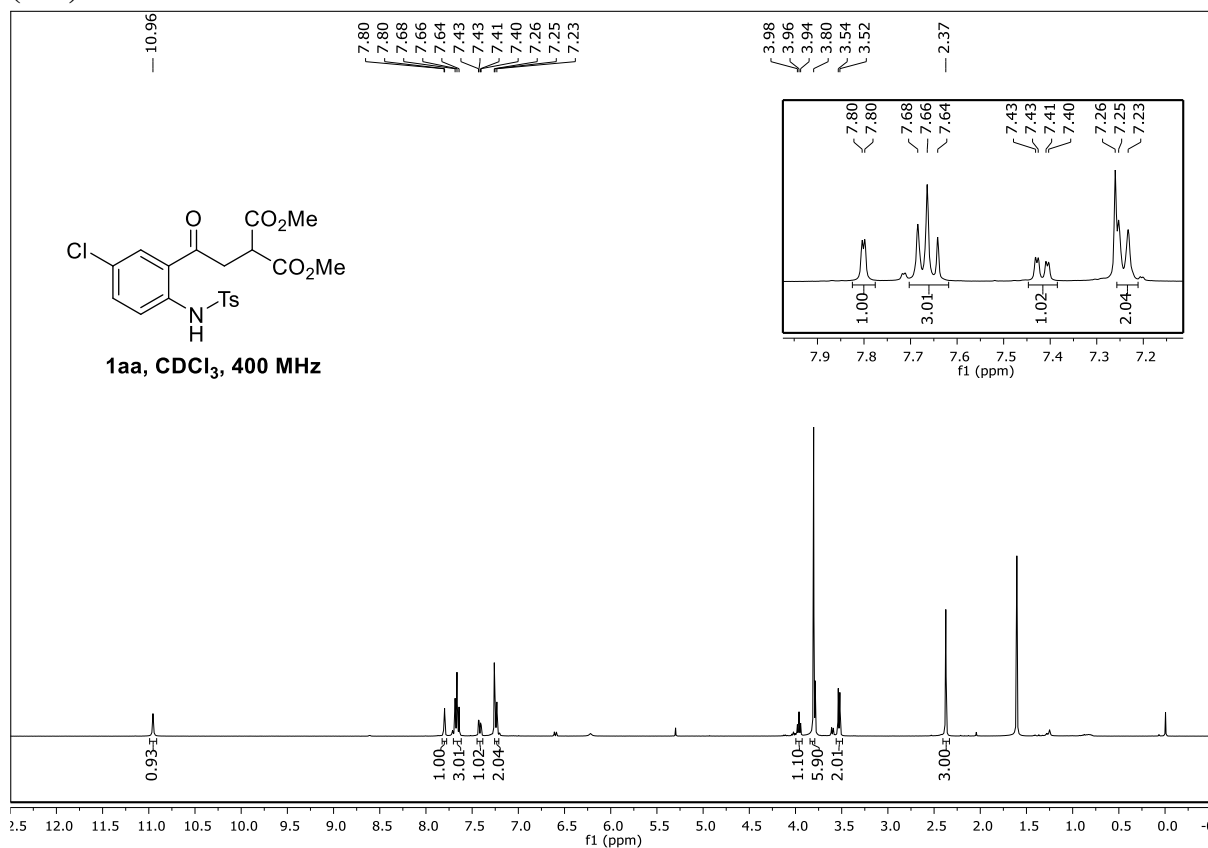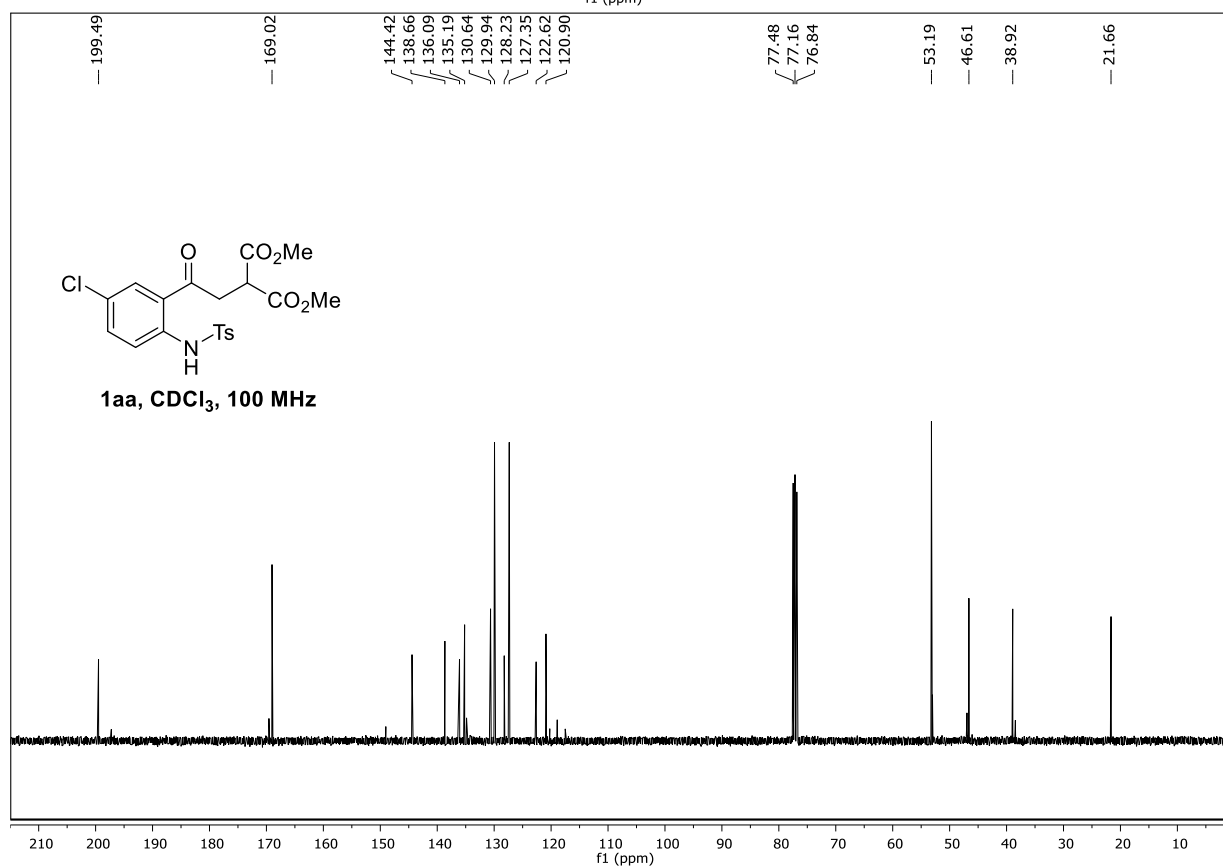

# Dimethyl 2-(2-(5-methyl-2-((4-methylphenyl)sulfonamido)phenyl)-2-oxoethyl)malonate

(1ab)

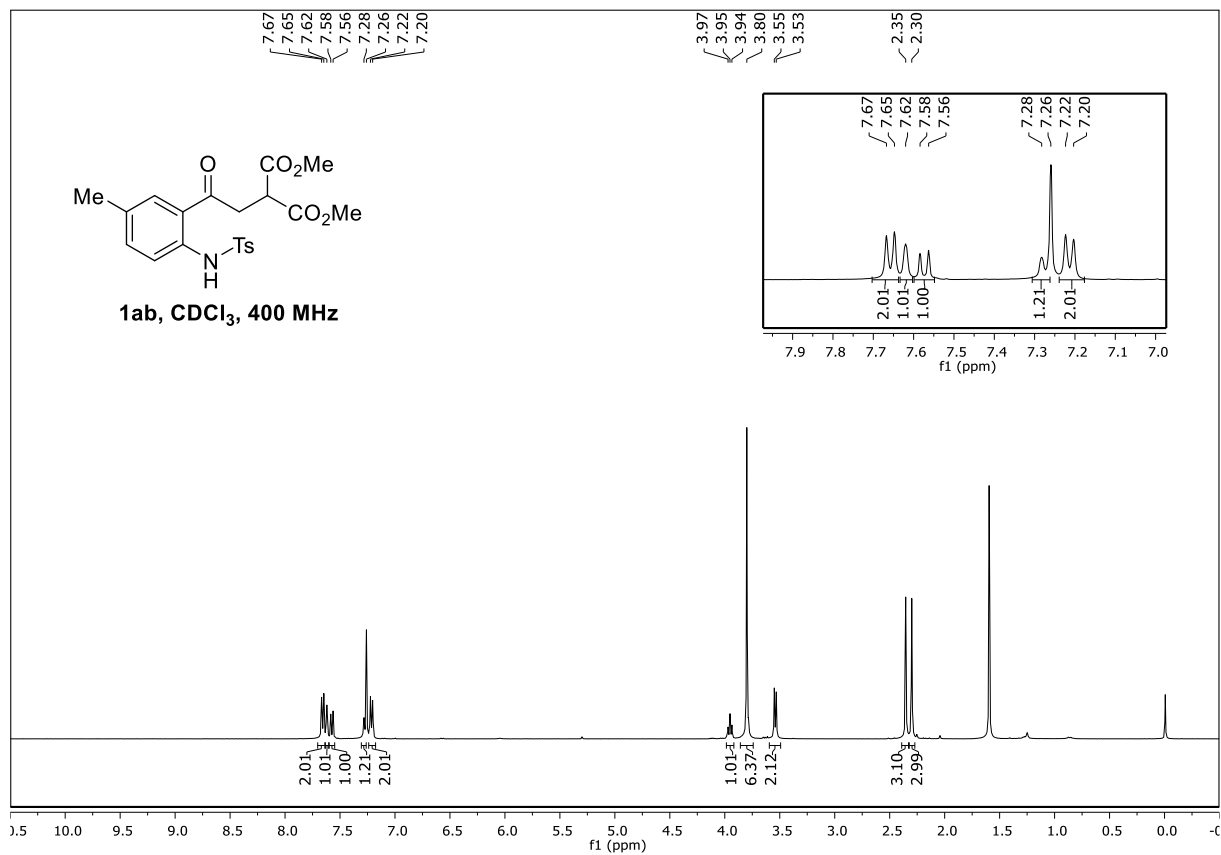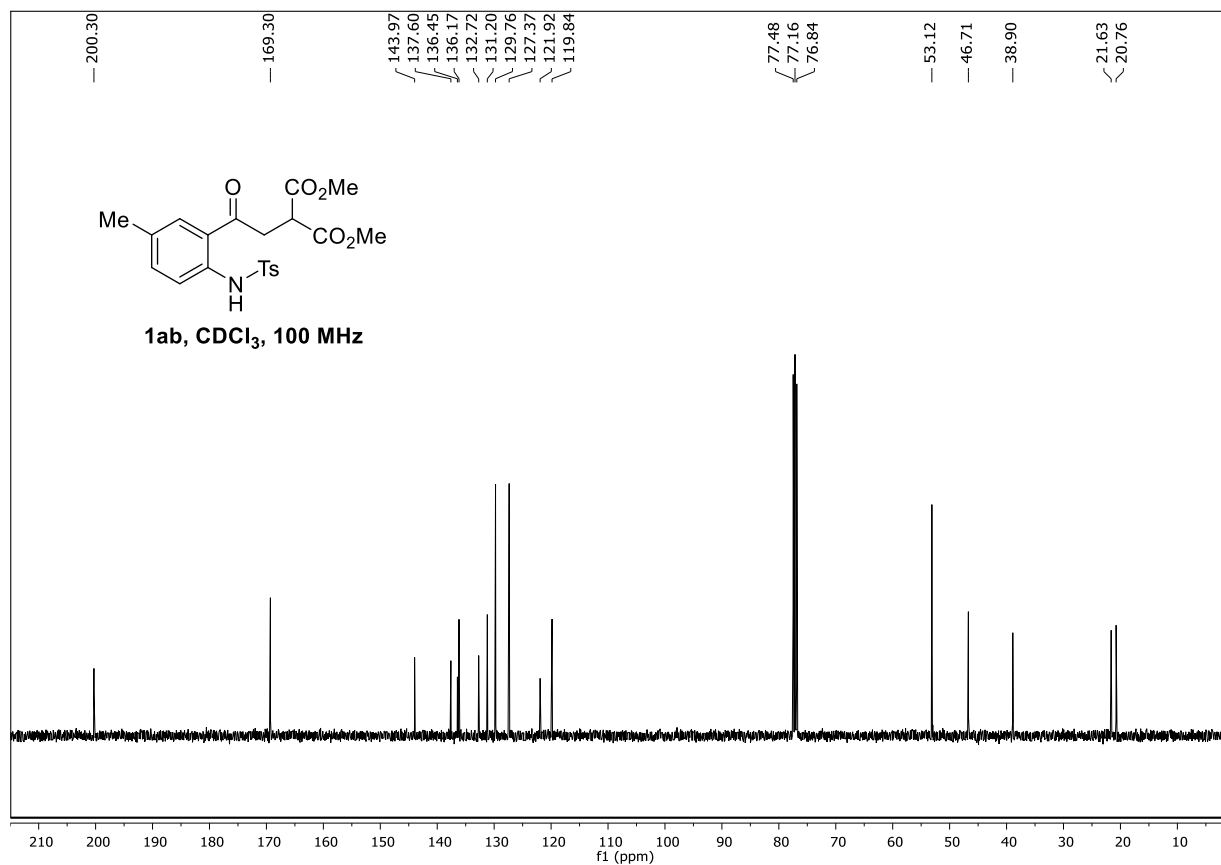

## 9. $^1\text{H}$ and $^{13}\text{C}$ NMR spectra of Cyclopentane-fused Quinoline-2-one Derivatives

### Dimethyl (*R*)-4-oxo-3-phenyl-5-tosyl-1,3,4,5-tetrahydro-2*H*-cyclopenta[*c*]quinoline-2,2-dicarboxylate (**3a**)

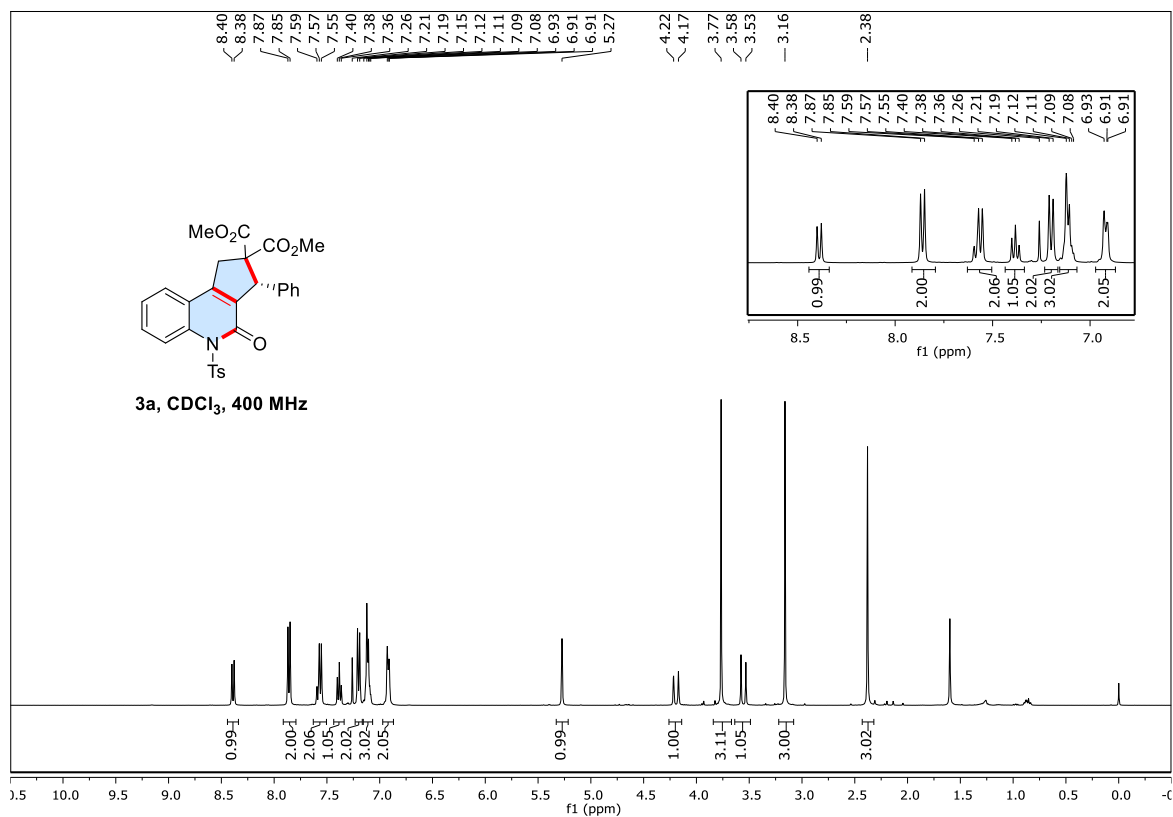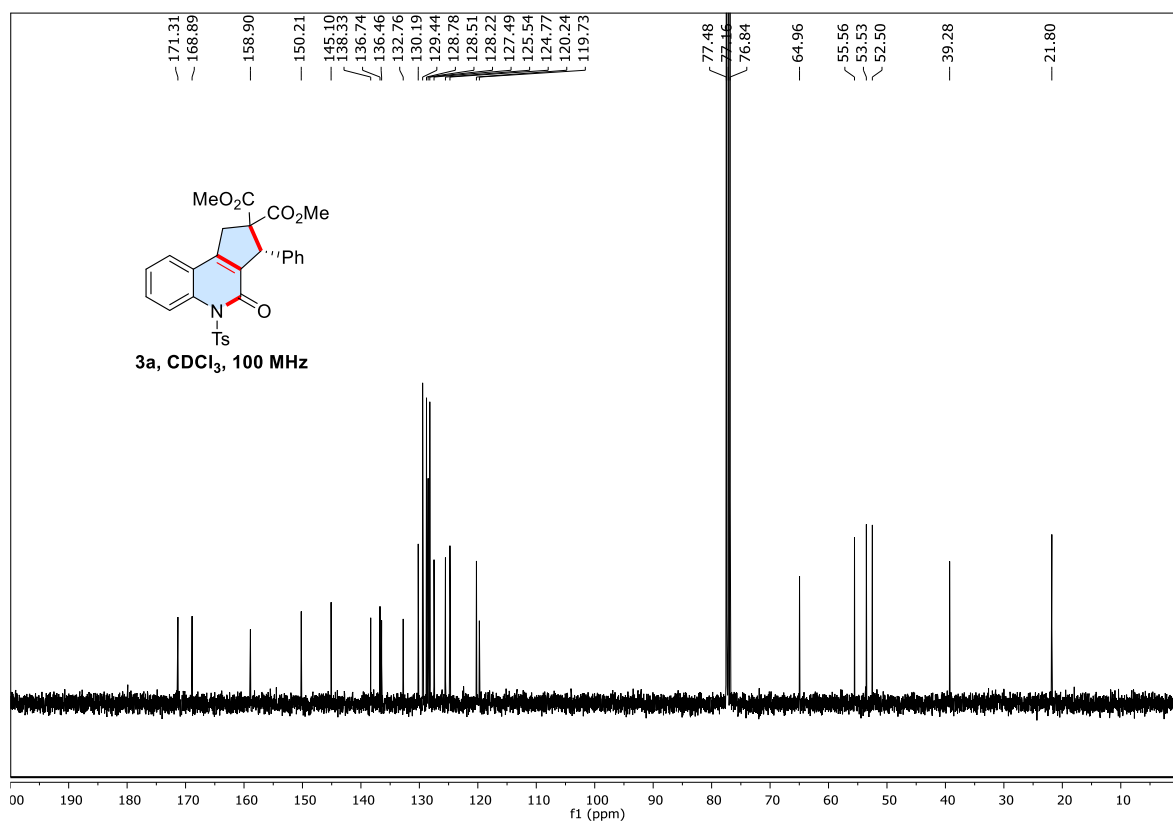

**Dimethyl (*R*)-3-(4-methoxyphenyl)-4-oxo-5-tosyl-1,3,4,5-tetrahydro-2*H*-cyclopenta[*c*]quinoline-2,2-dicarboxylate (**3b**)**

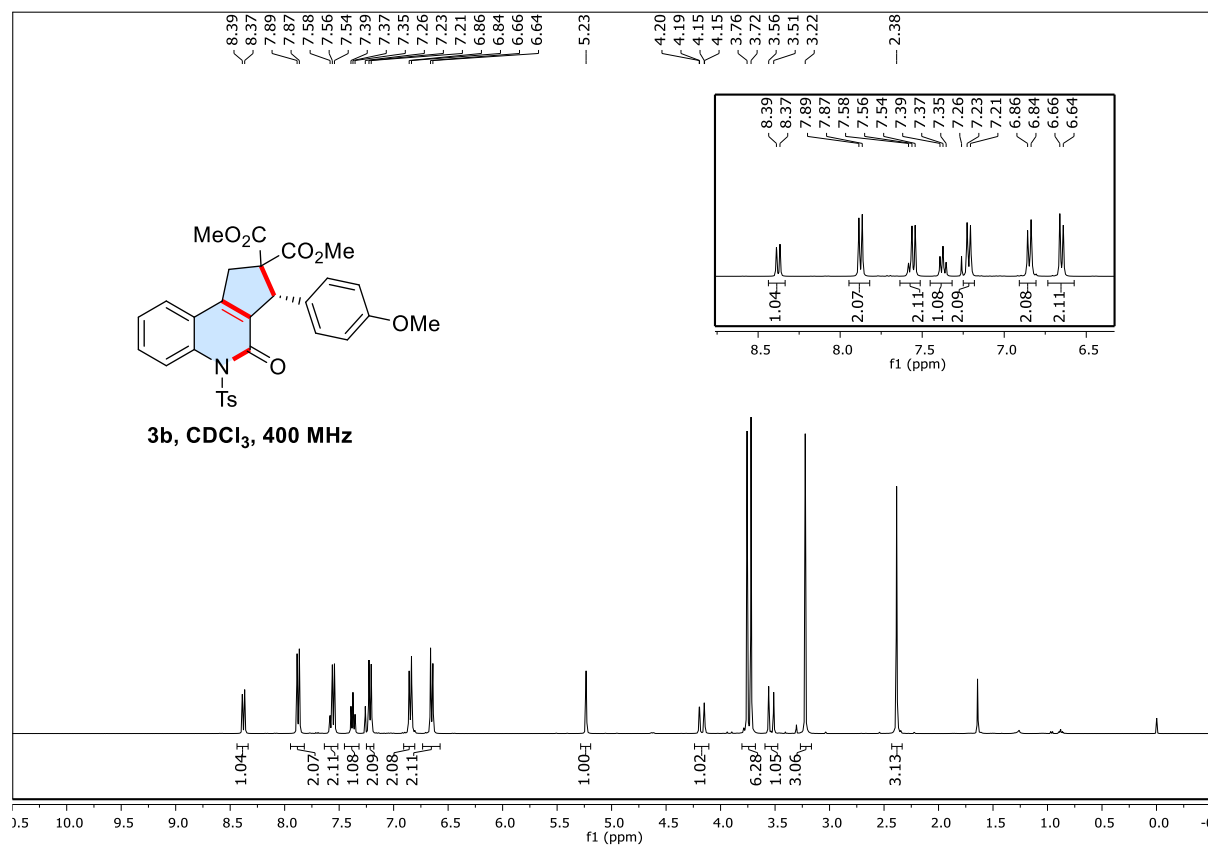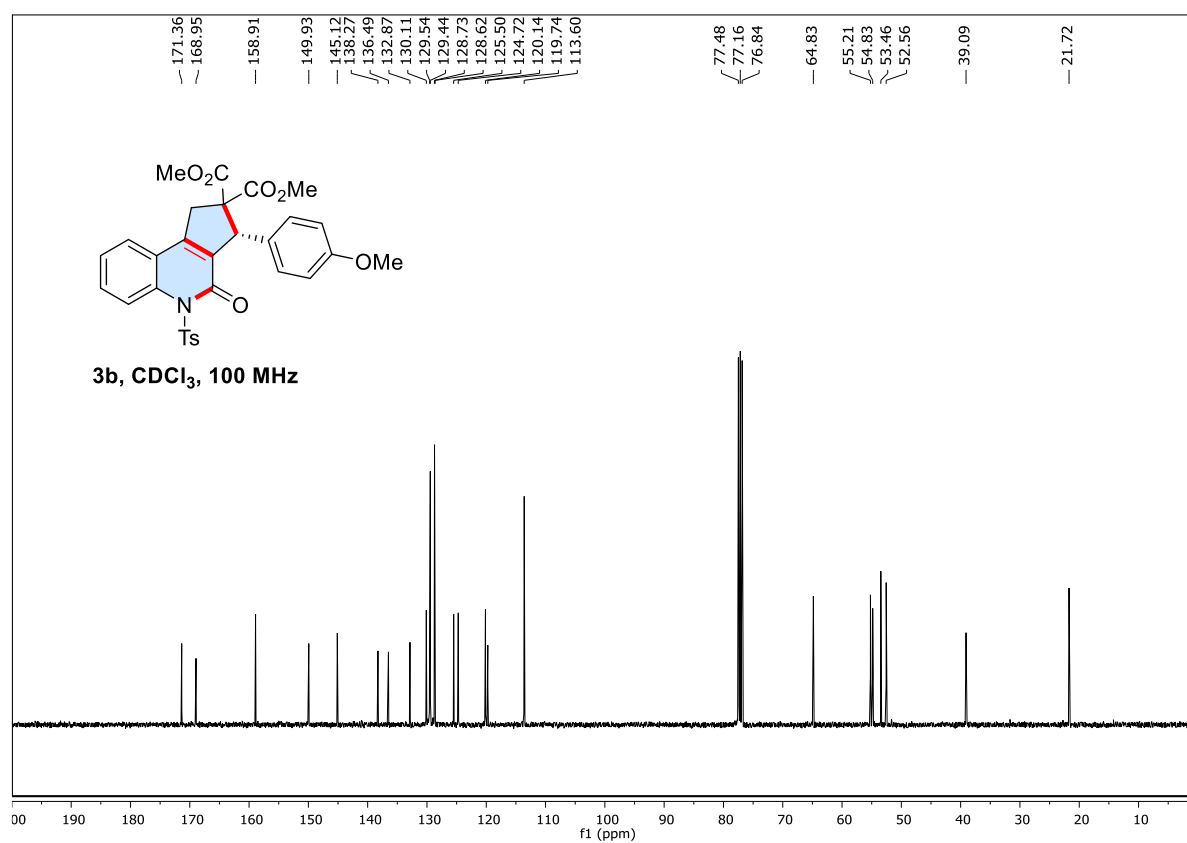

**Dimethyl (*R*)-4-oxo-3-(*p*-tolyl)-5-tosyl-1,3,4,5-tetrahydro-2*H*-cyclopenta[*c*]quinoline-2,2-dicarboxylate (**3c**)**

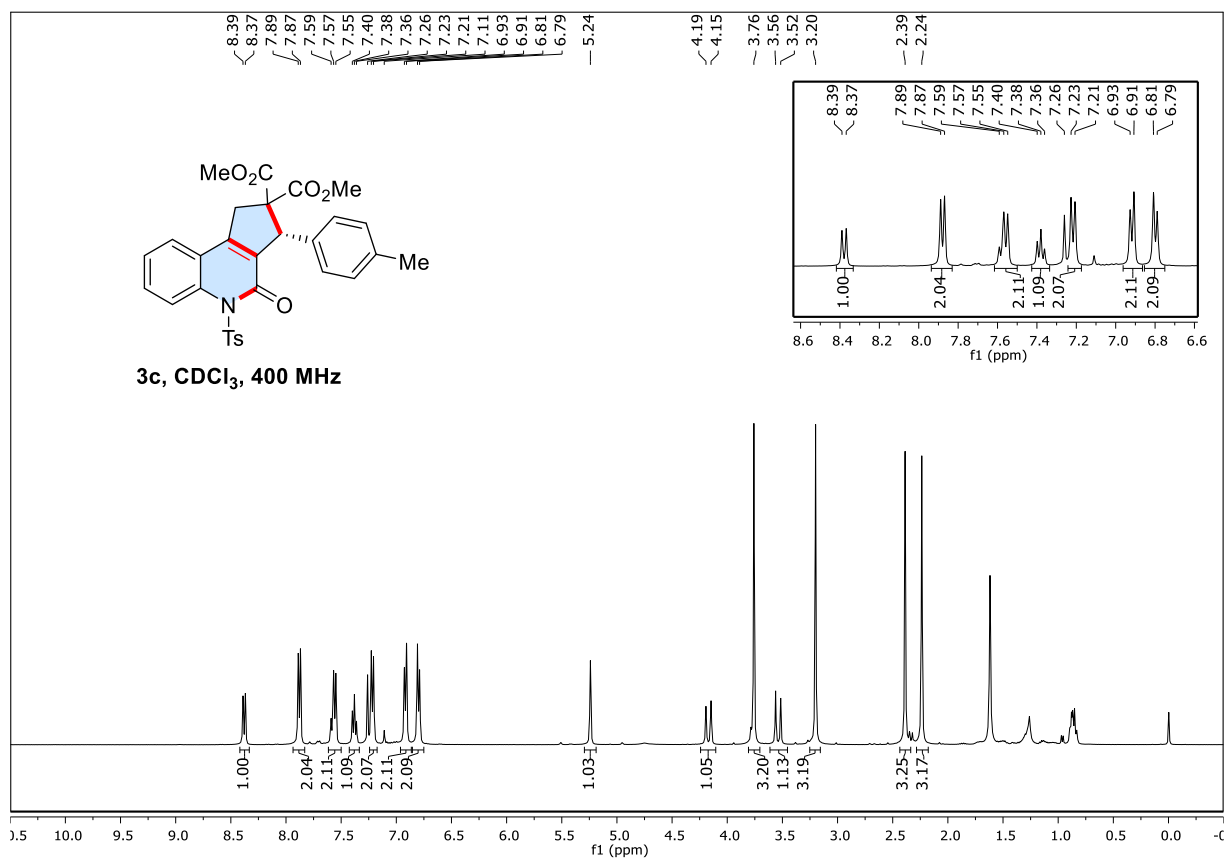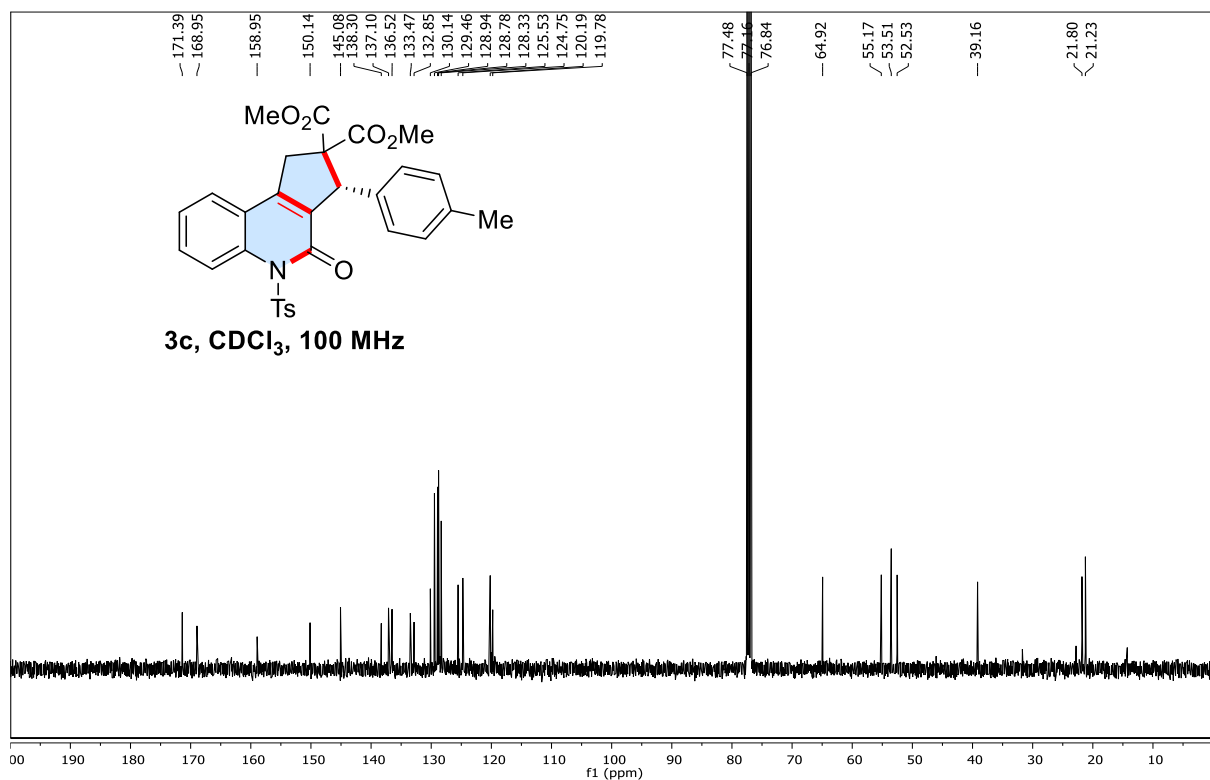

**Dimethyl (*R*)-3-(4-bromophenyl)-4-oxo-5-tosyl-1,3,4,5-tetrahydro-2*H*-cyclopenta[*c*]quinoline-2,2-dicarboxylate (**3d**)**

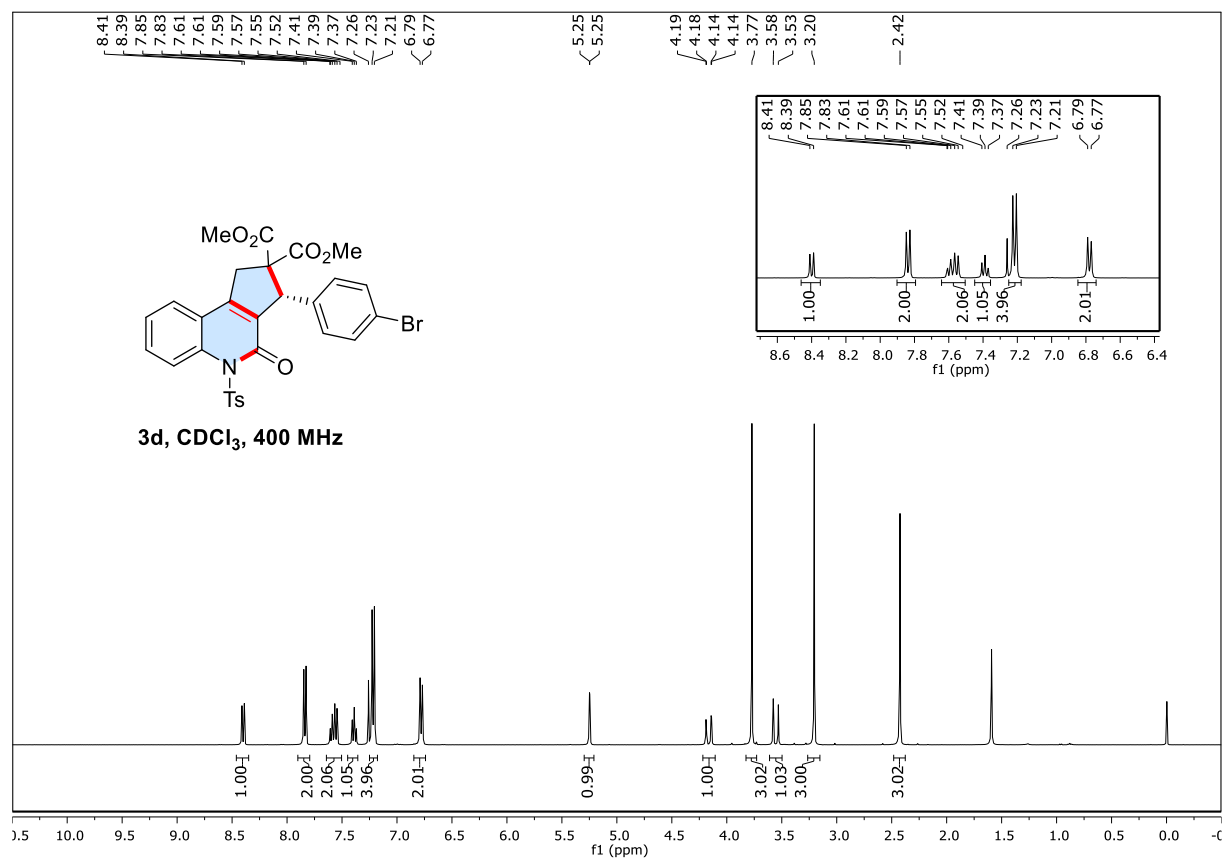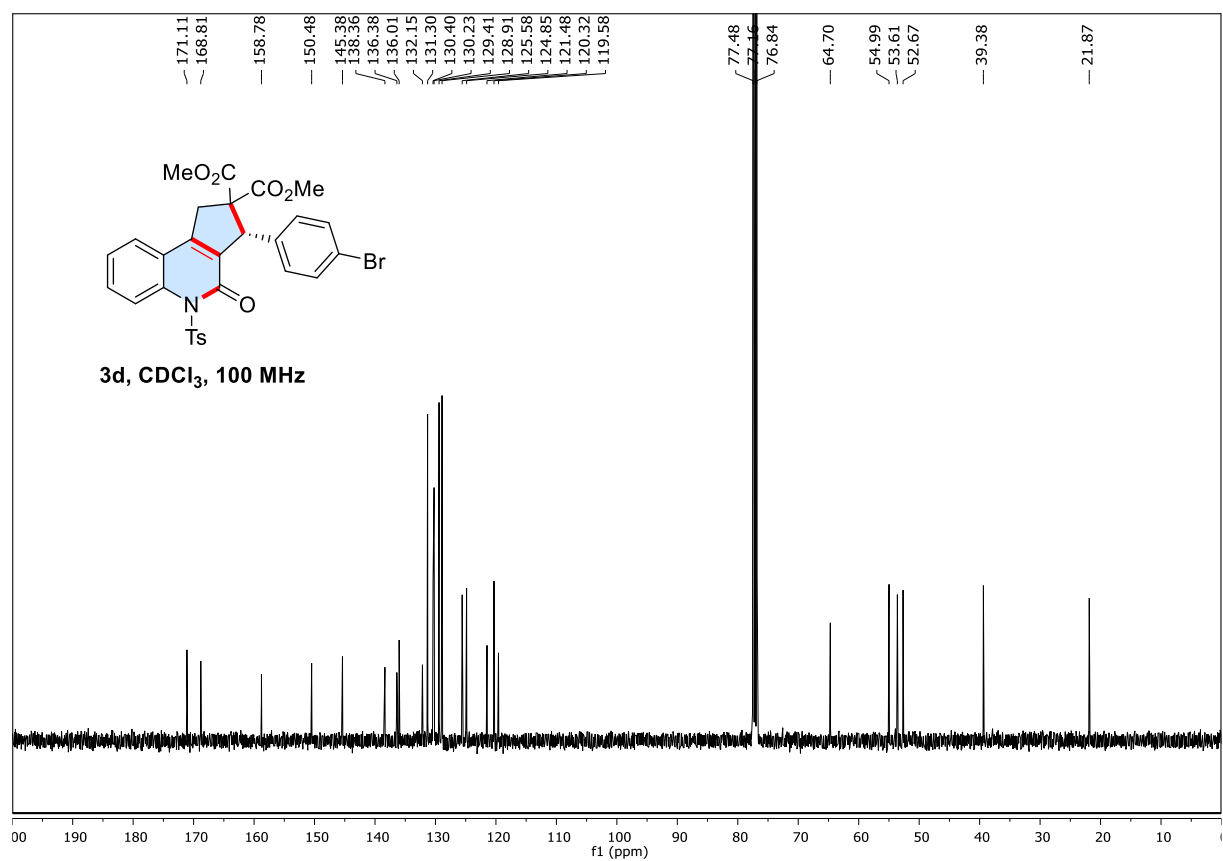



**Dimethyl (*R*)-3-(4-chlorophenyl)-4-oxo-5-tosyl-1,3,4,5-tetrahydro-2*H*-cyclopenta[*c*]quinoline-2,2-dicarboxylate (**3e**)**

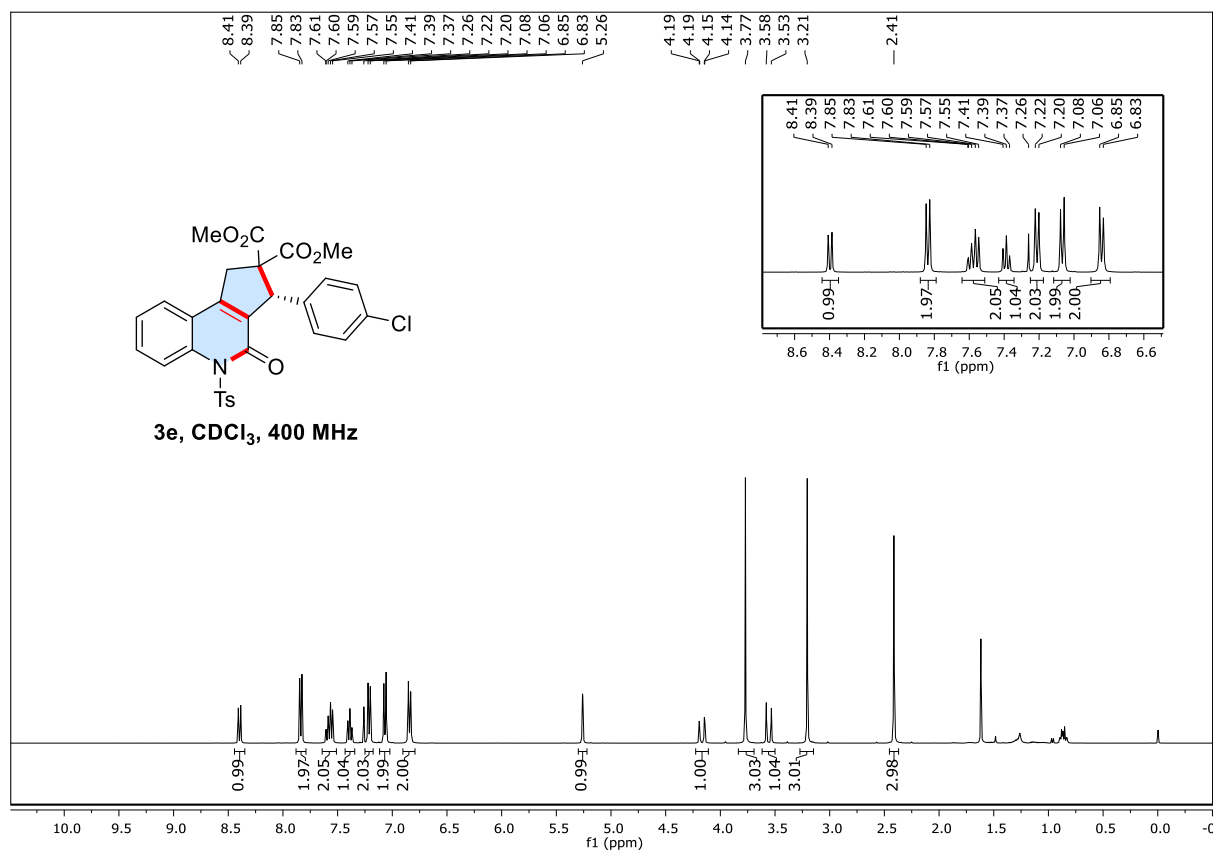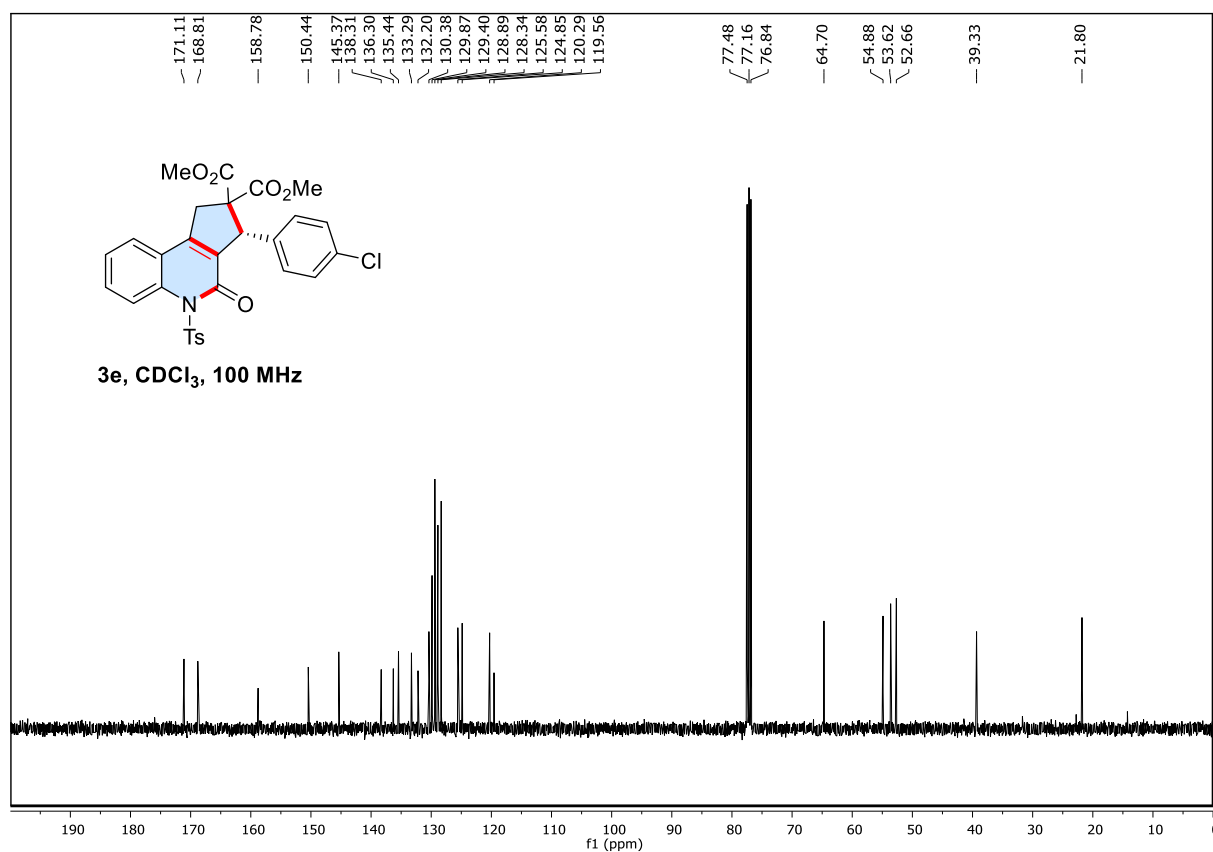

**Dimethyl (*R*)-3-(4-fluorophenyl)-4-oxo-5-tosyl-1,3,4,5-tetrahydro-2*H*-cyclopenta[*c*]quinoline-2,2-dicarboxylate (**3f**)**

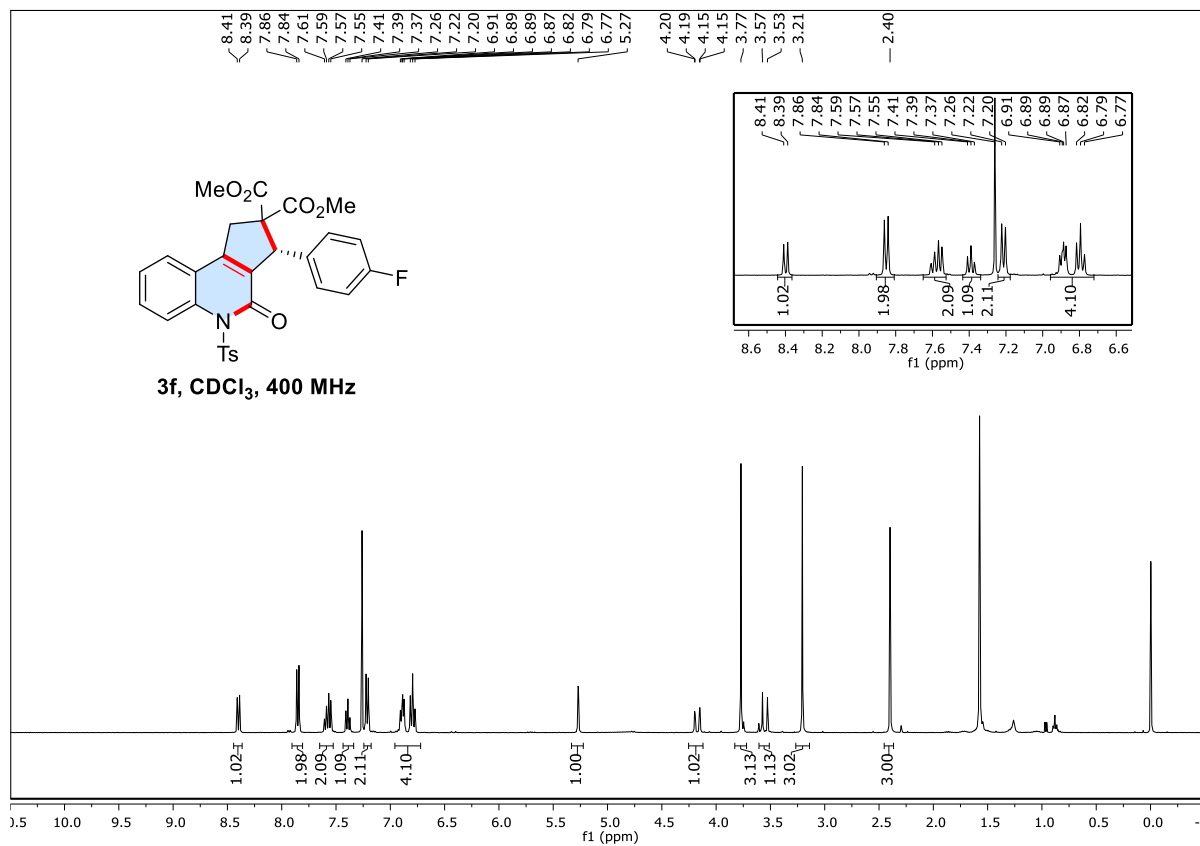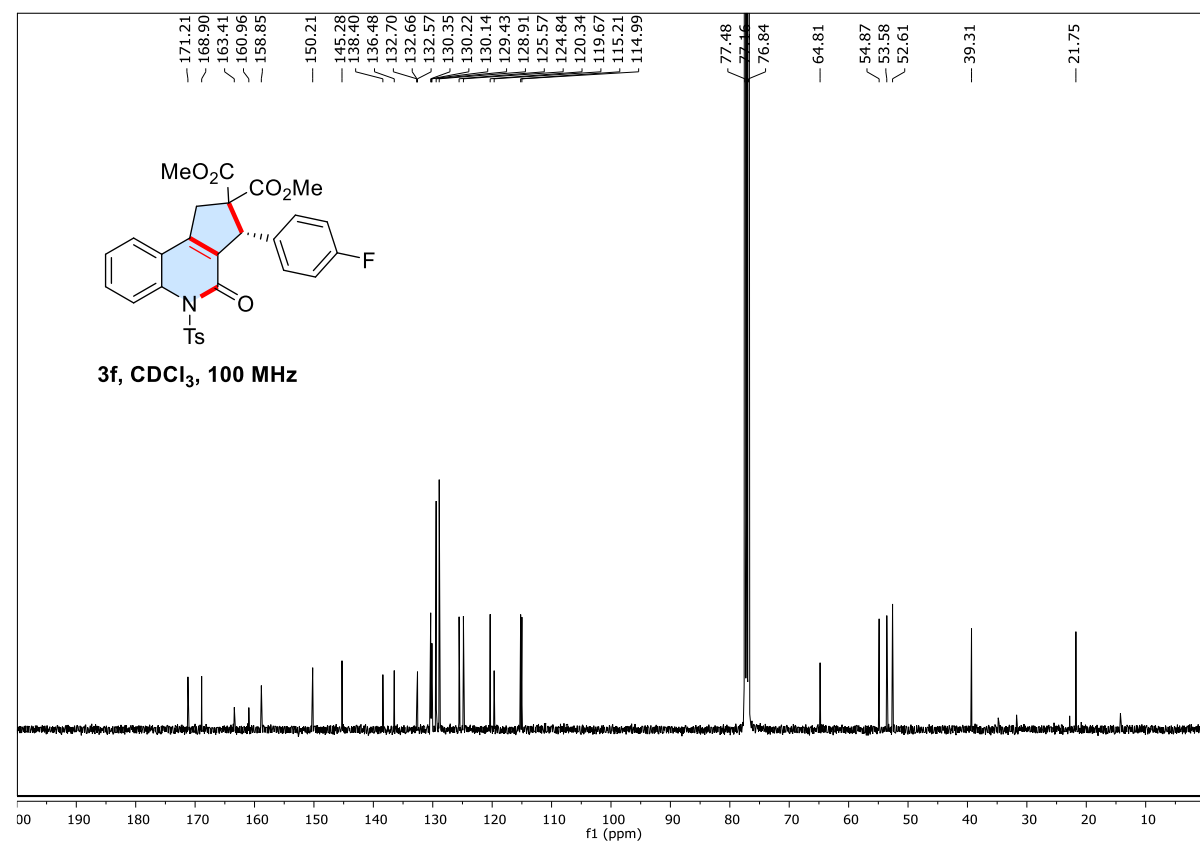

**Dimethyl (*R*)-4-oxo-5-tosyl-3-(4-(trifluoromethyl)phenyl)-1,3,4,5-tetrahydro-2*H*-cyclopenta[*c*]quinoline-2,2-dicarboxylate (**3g**)**

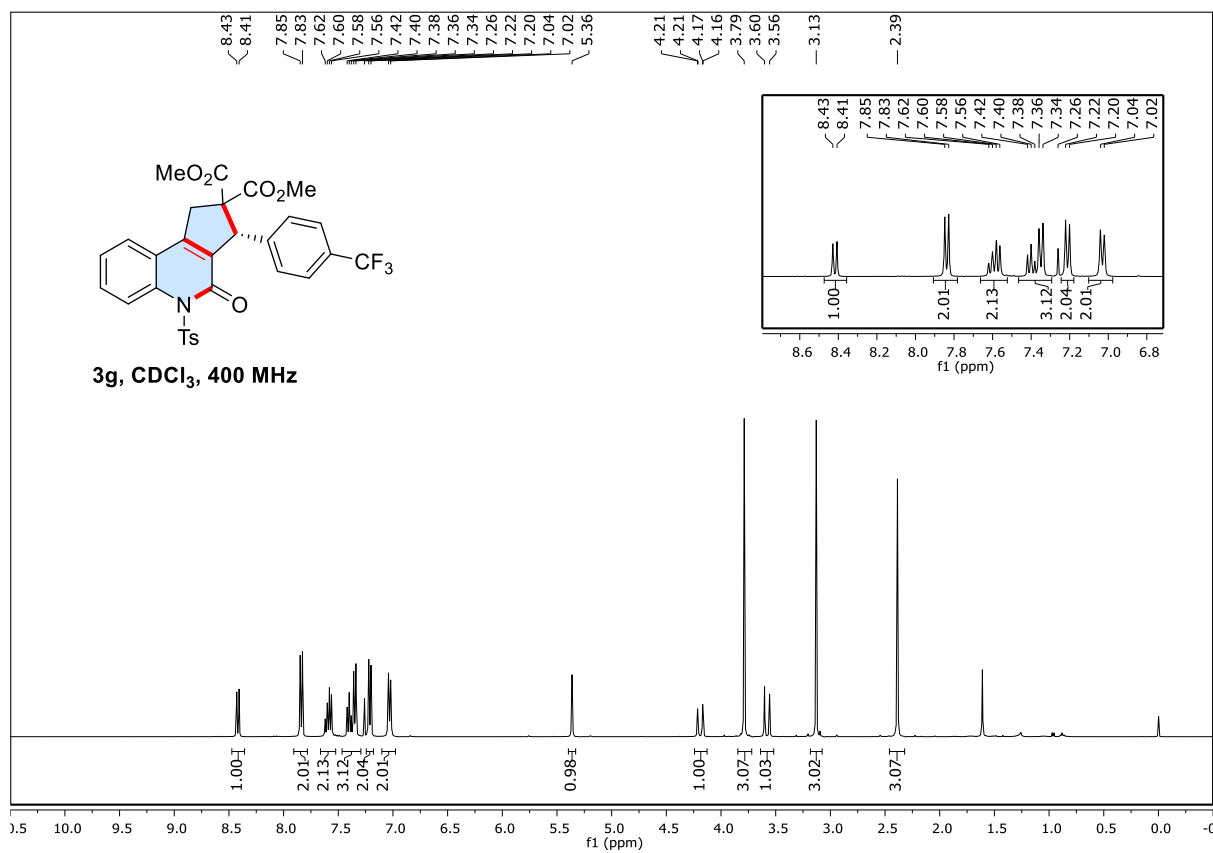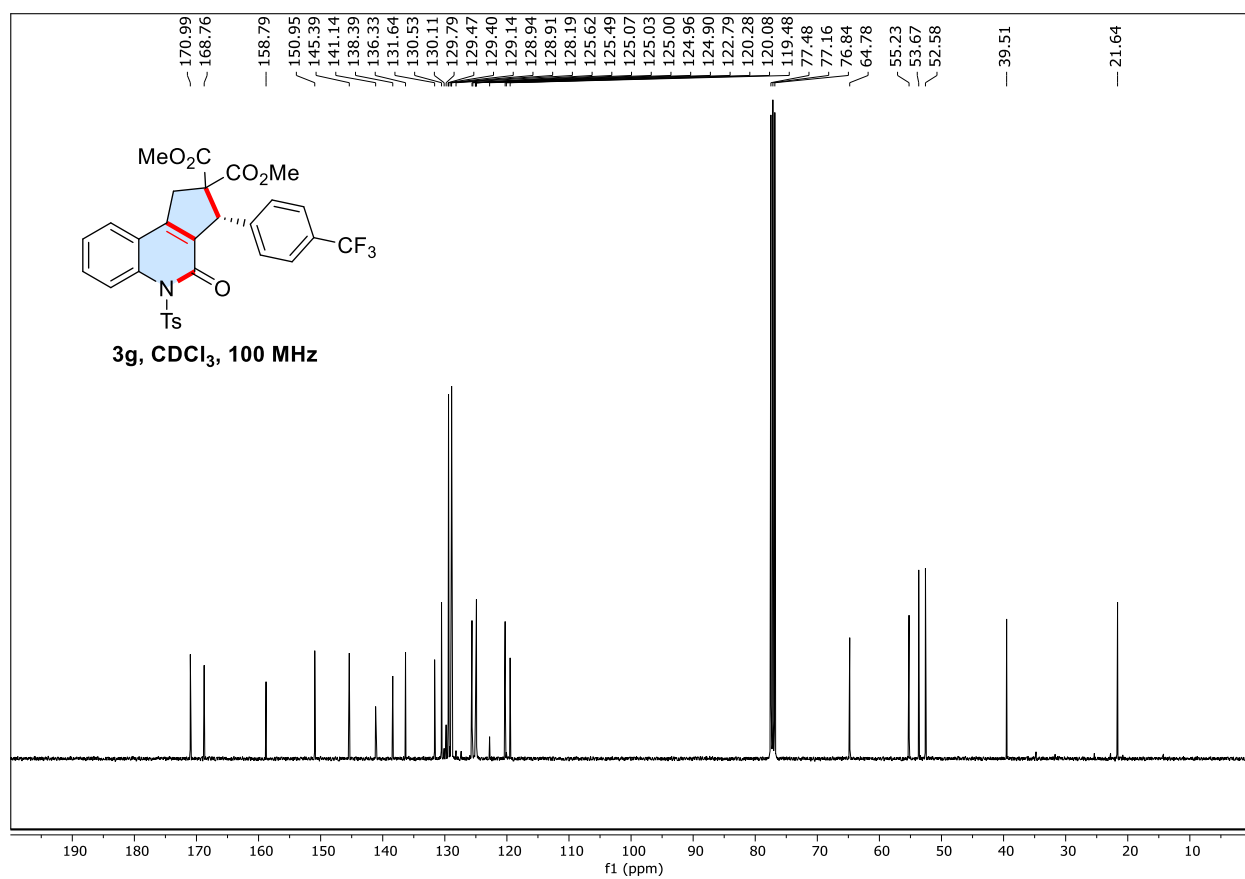

**Dimethyl (*R*)-3-(4-nitrophenyl)-4-oxo-5-tosyl-1,3,4,5-tetrahydro-2*H*-cyclopenta[*c*]quinoline-2,2-dicarboxylate (**3h**)**

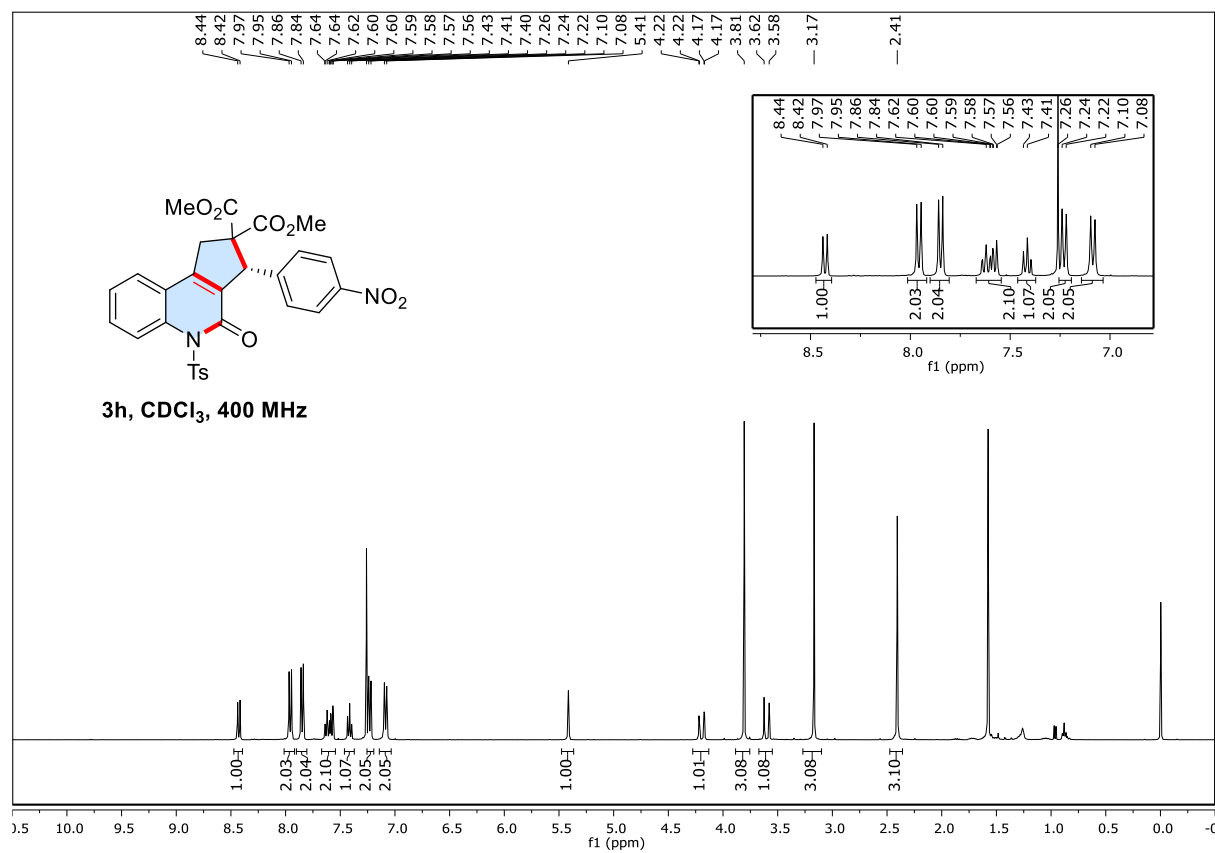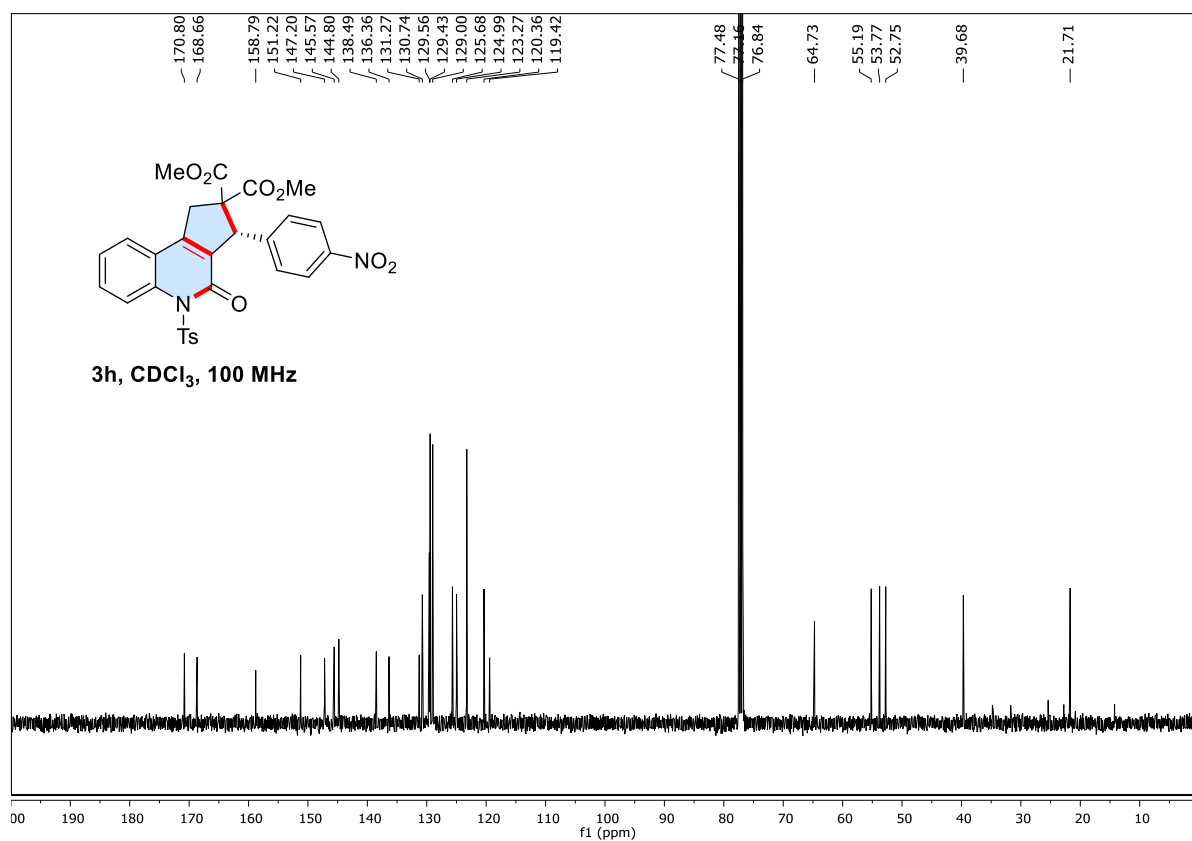

**Dimethyl (*R*)-4-oxo-3-(*m*-tolyl)-5-tosyl-1,3,4,5-tetrahydro-2*H*-cyclopenta[*c*]quinoline-2,2-dicarboxylate (**3i**)**

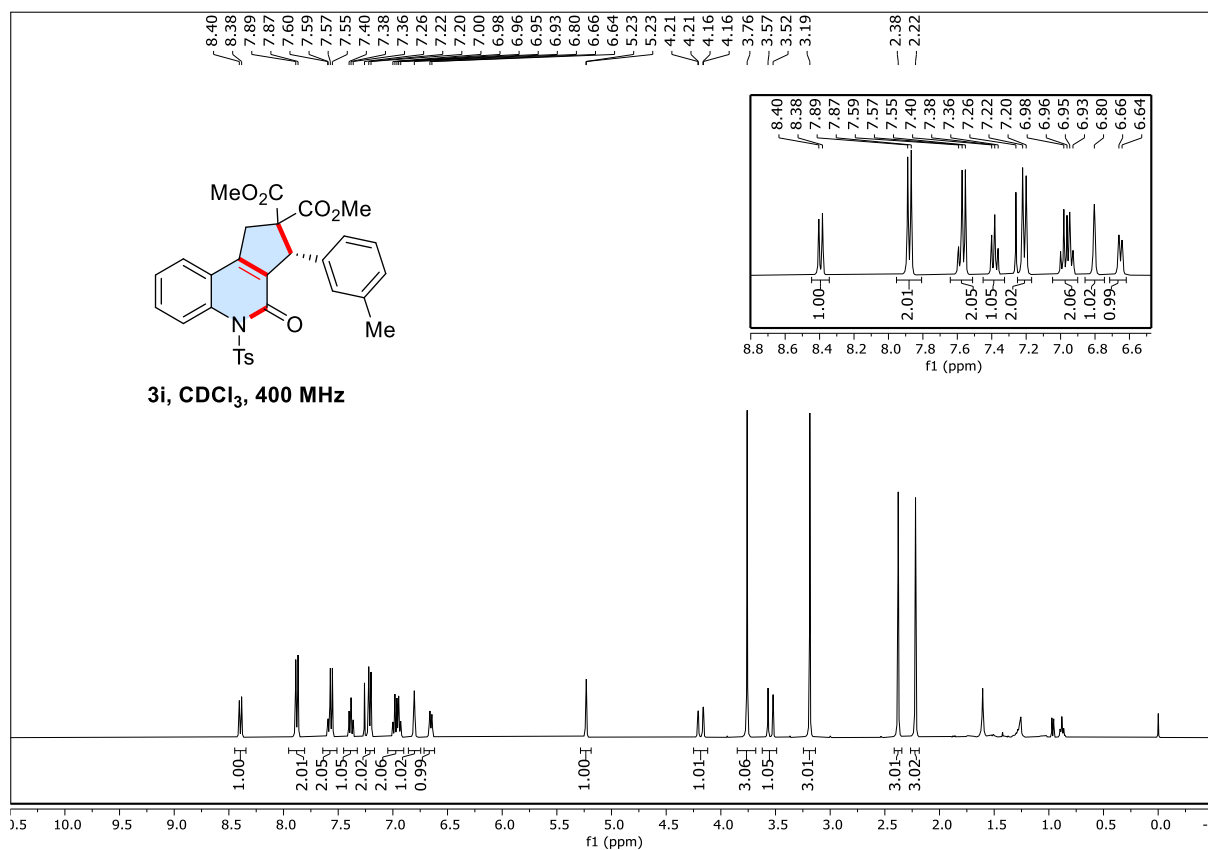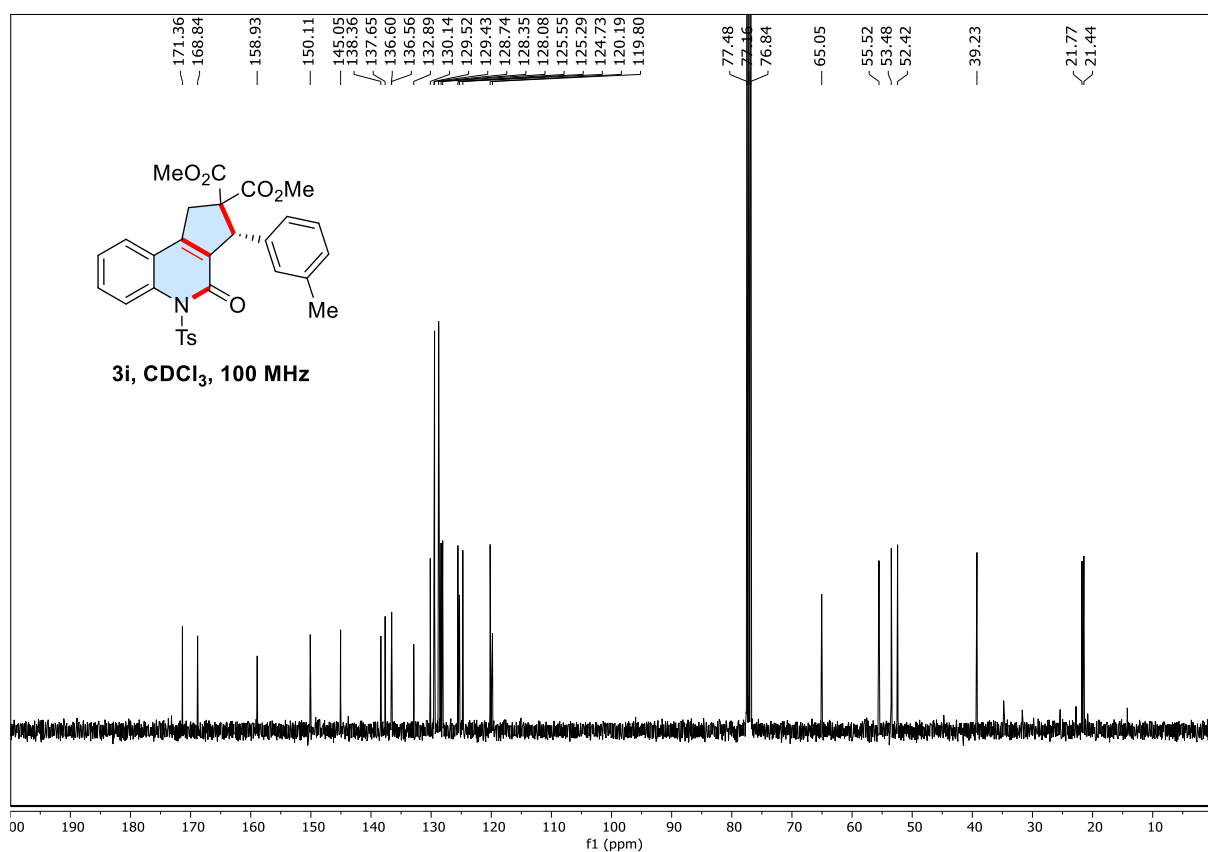

**Dimethyl (*R*)-3-(3-methoxyphenyl)-4-oxo-5-tosyl-1,3,4,5-tetrahydro-2*H*-cyclopen-  
ta[*c*]quinoline-2,2-dicarboxylate (**3j**)**

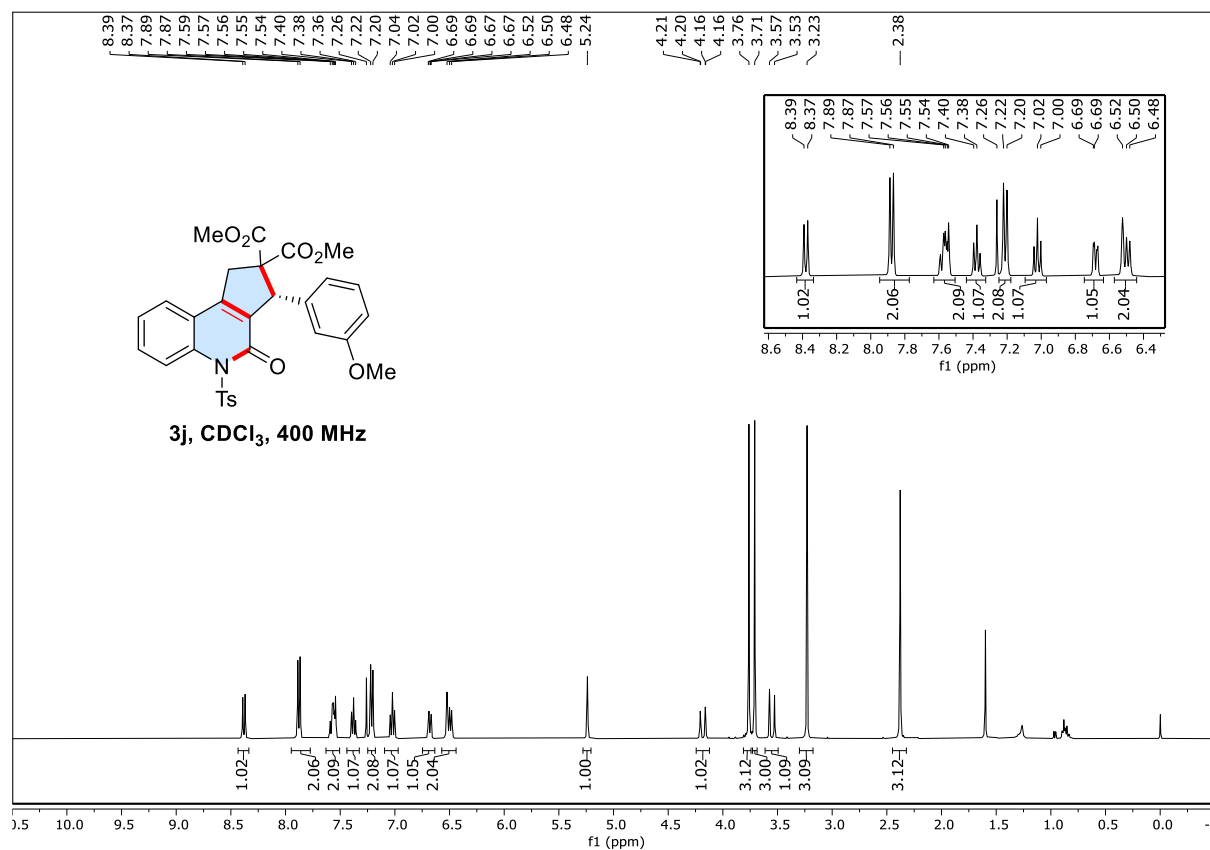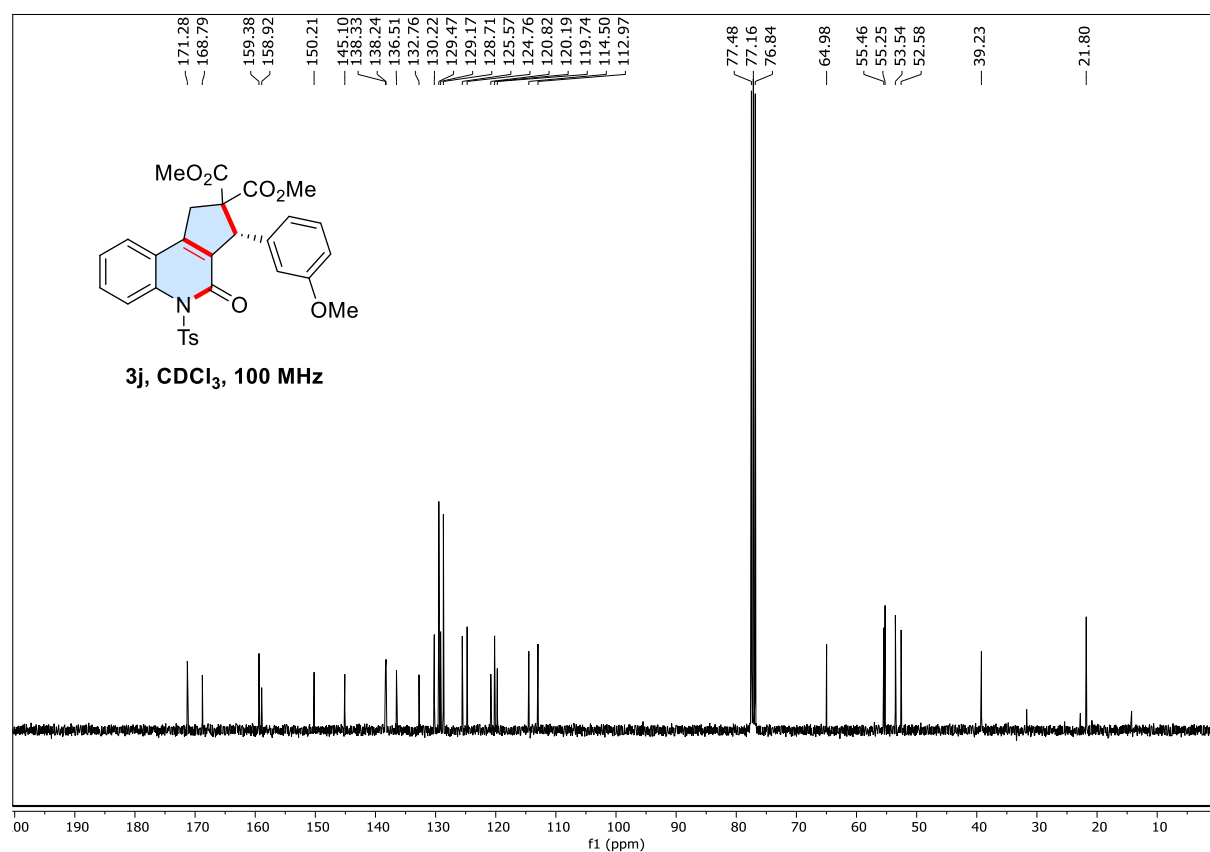

**Dimethyl (*R*)-3-(3-bromophenyl)-4-oxo-5-tosyl-1,3,4,5-tetrahydro-2*H*-cyclopenta[*c*]quinoline-2,2-dicarboxylate (**3k**)**

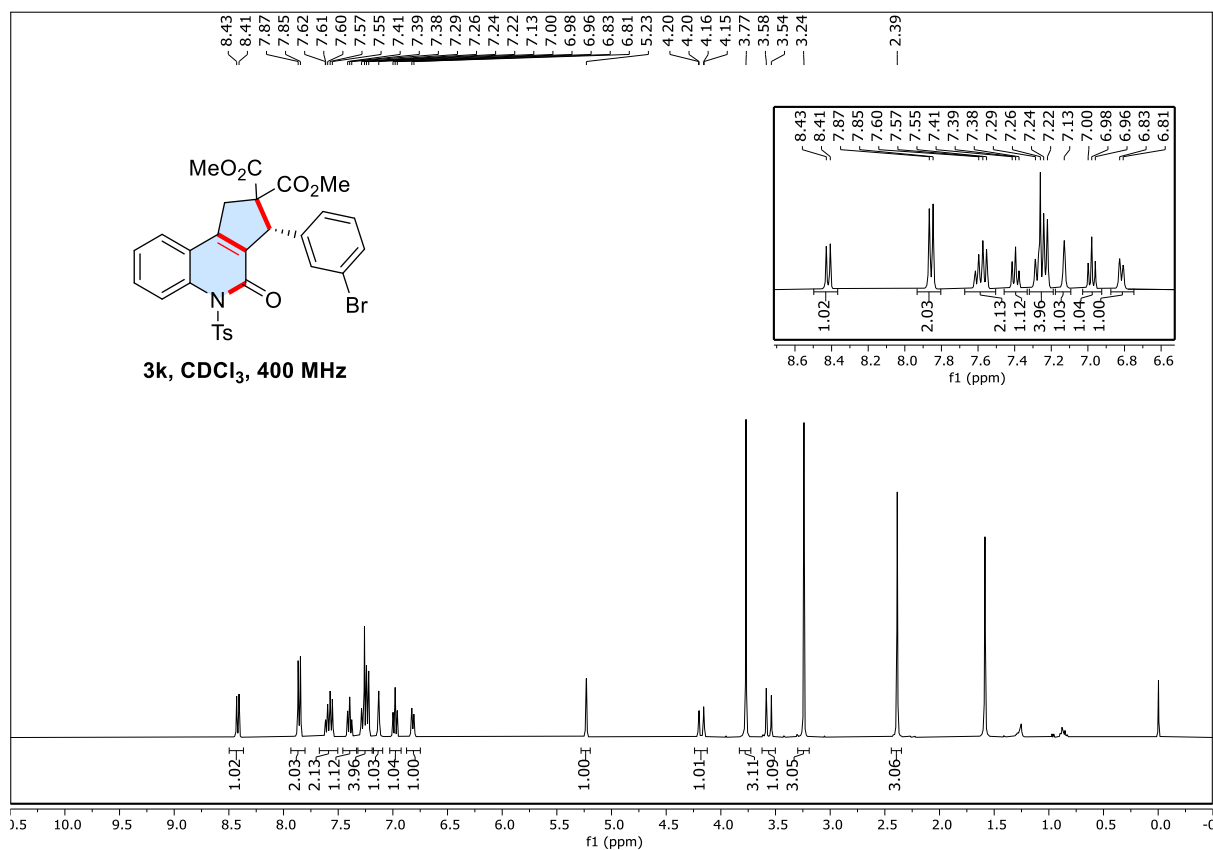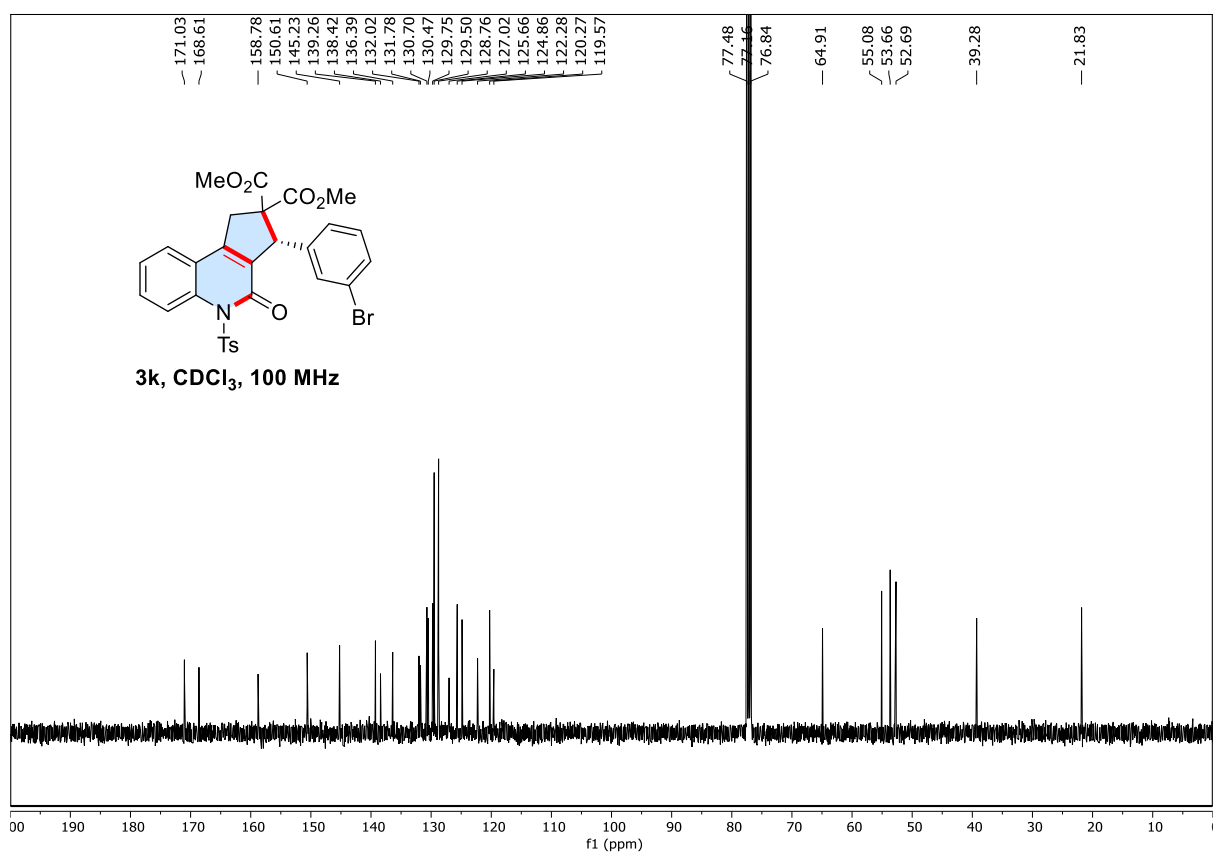

**Dimethyl (*R*)-3-(3-chlorophenyl)-4-oxo-5-tosyl-1,3,4,5-tetrahydro-2*H*-cyclopenta[*c*]quinoline-2,2-dicarboxylate (**3I**)**

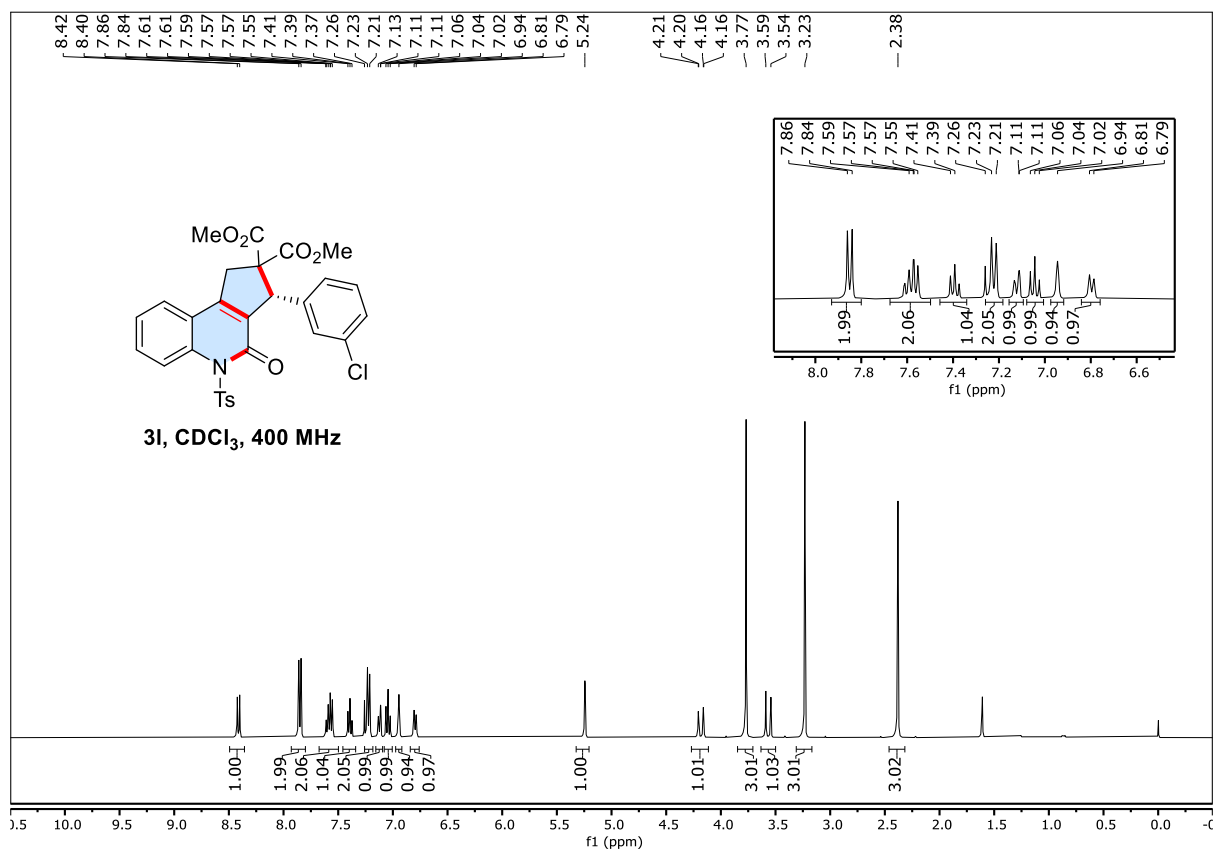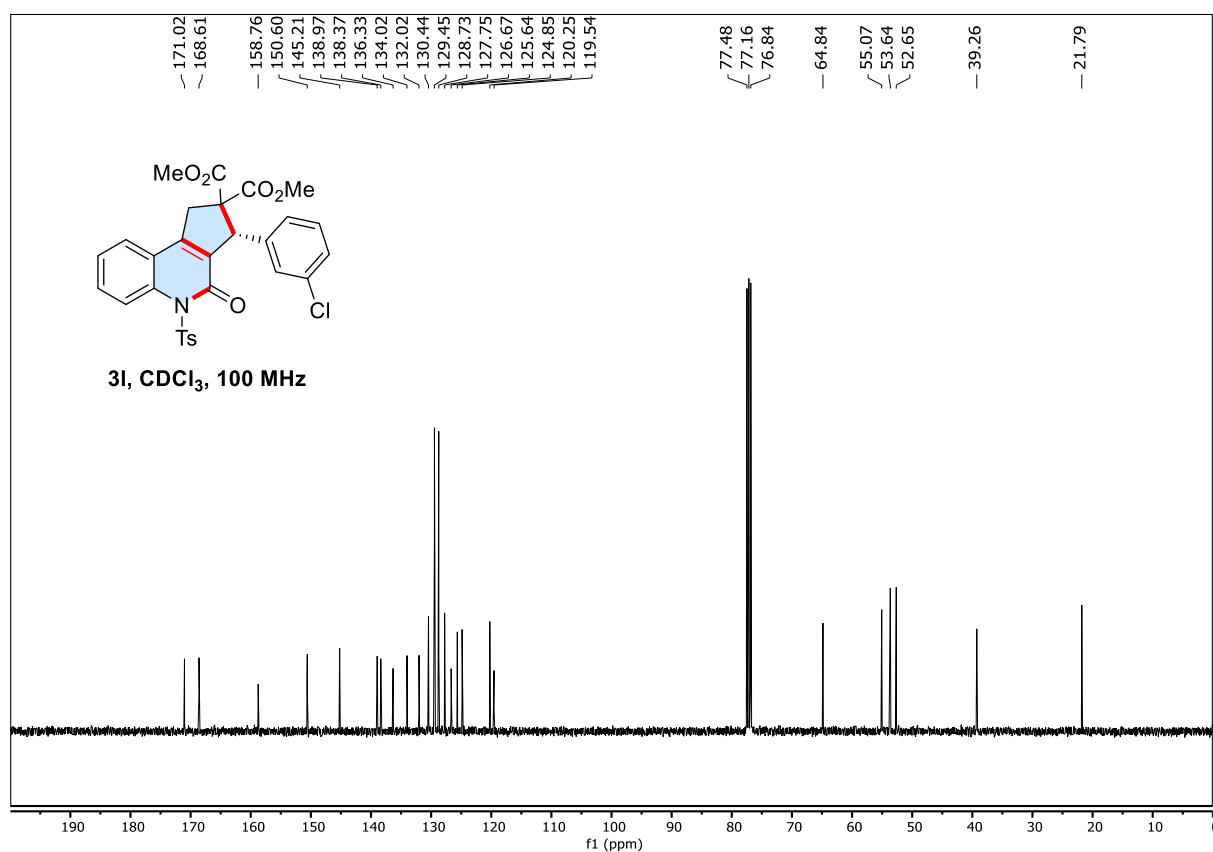



**Dimethyl (*R*)-3-(2-bromophenyl)-4-oxo-5-tosyl-1,3,4,5-tetrahydro-2*H*-cyclopenta[*c*]quinoline-2,2-dicarboxylate (**3m**)**

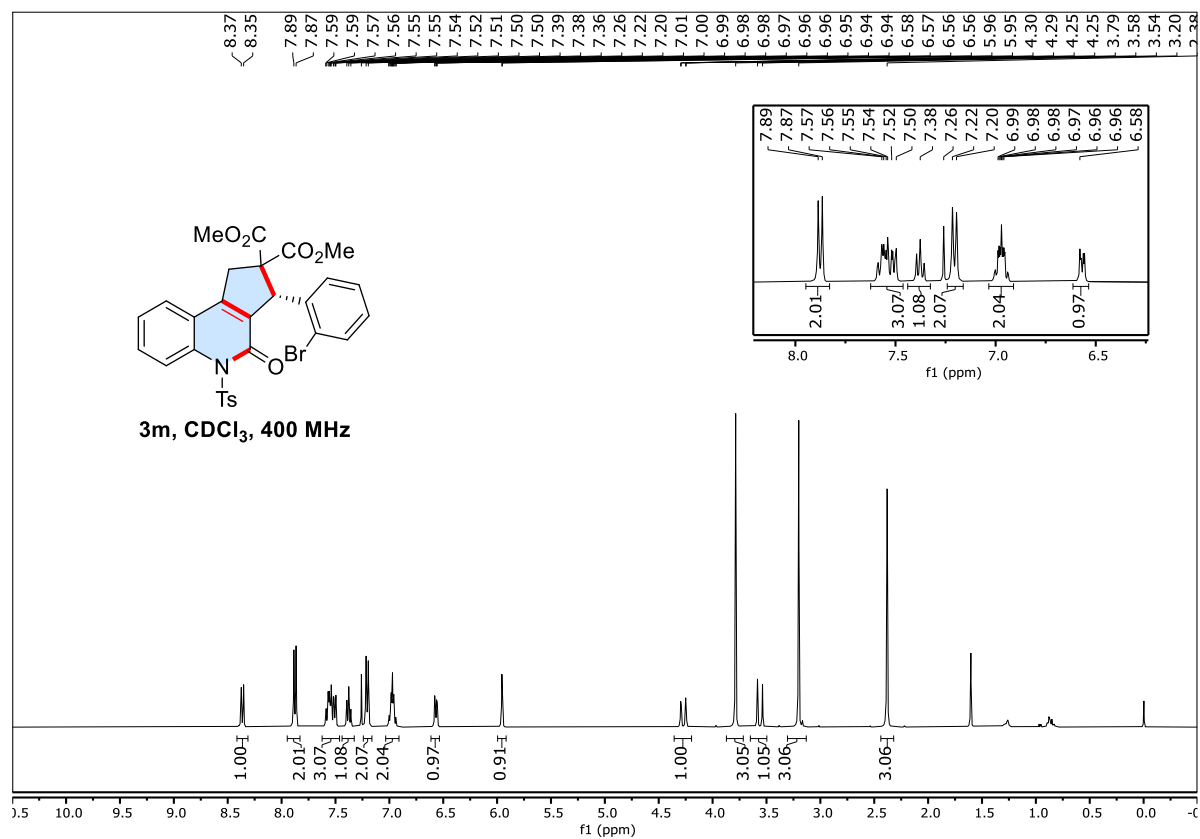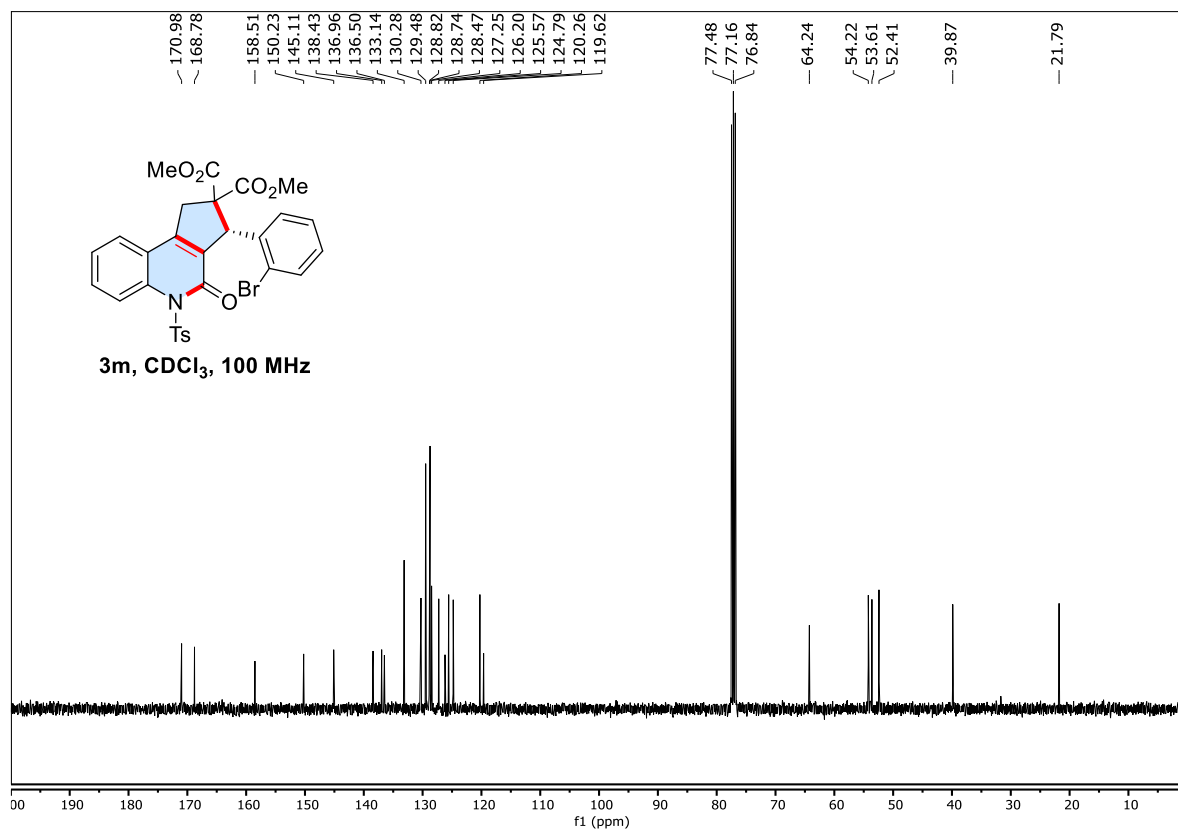

**Dimethyl (*R*)-3-(2-chlorophenyl)-4-oxo-5-tosyl-1,3,4,5-tetrahydro-2*H*-cyclopenta[*c*]quinoline-2,2-dicarboxylate (**3n**)**

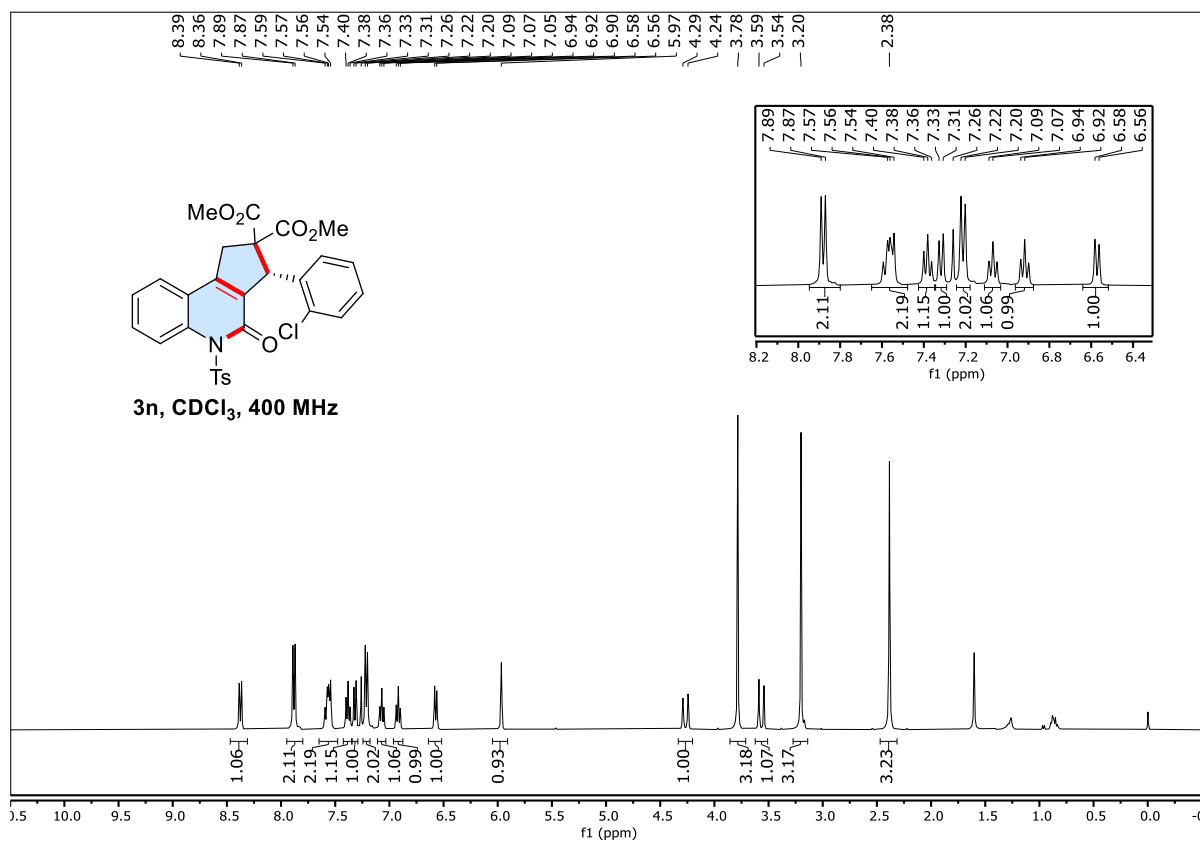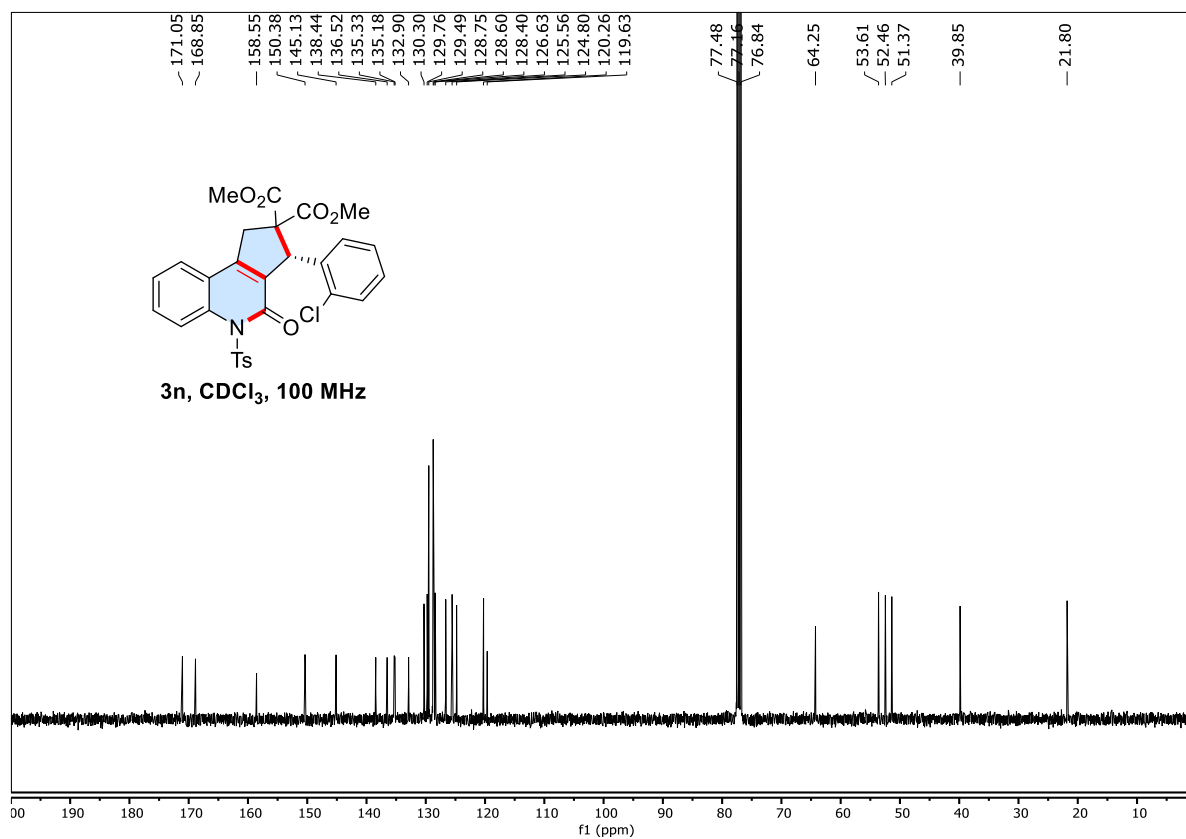

**Dimethyl (*R*)-3-(2-fluorophenyl)-4-oxo-5-tosyl-1,3,4,5-tetrahydro-2*H*-cyclopenta[*c*]quinoline-2,2-dicarboxylate (**3o**)**

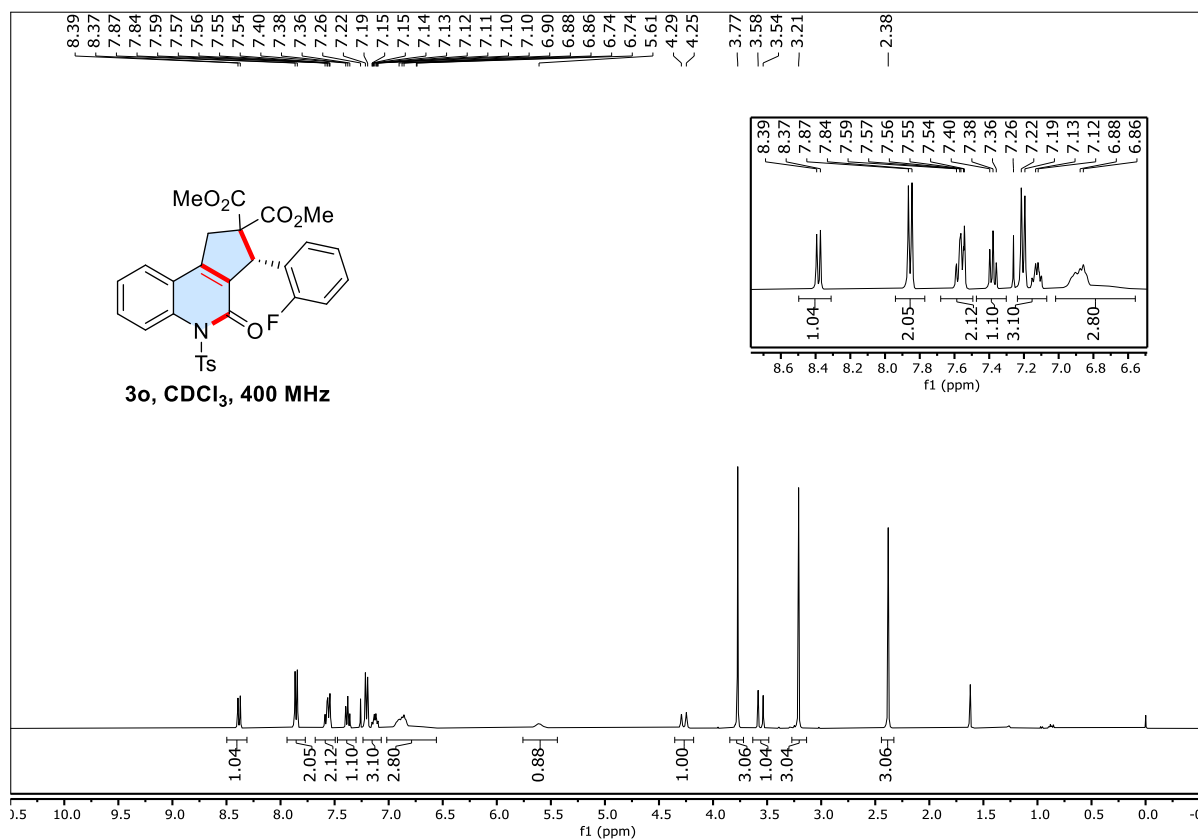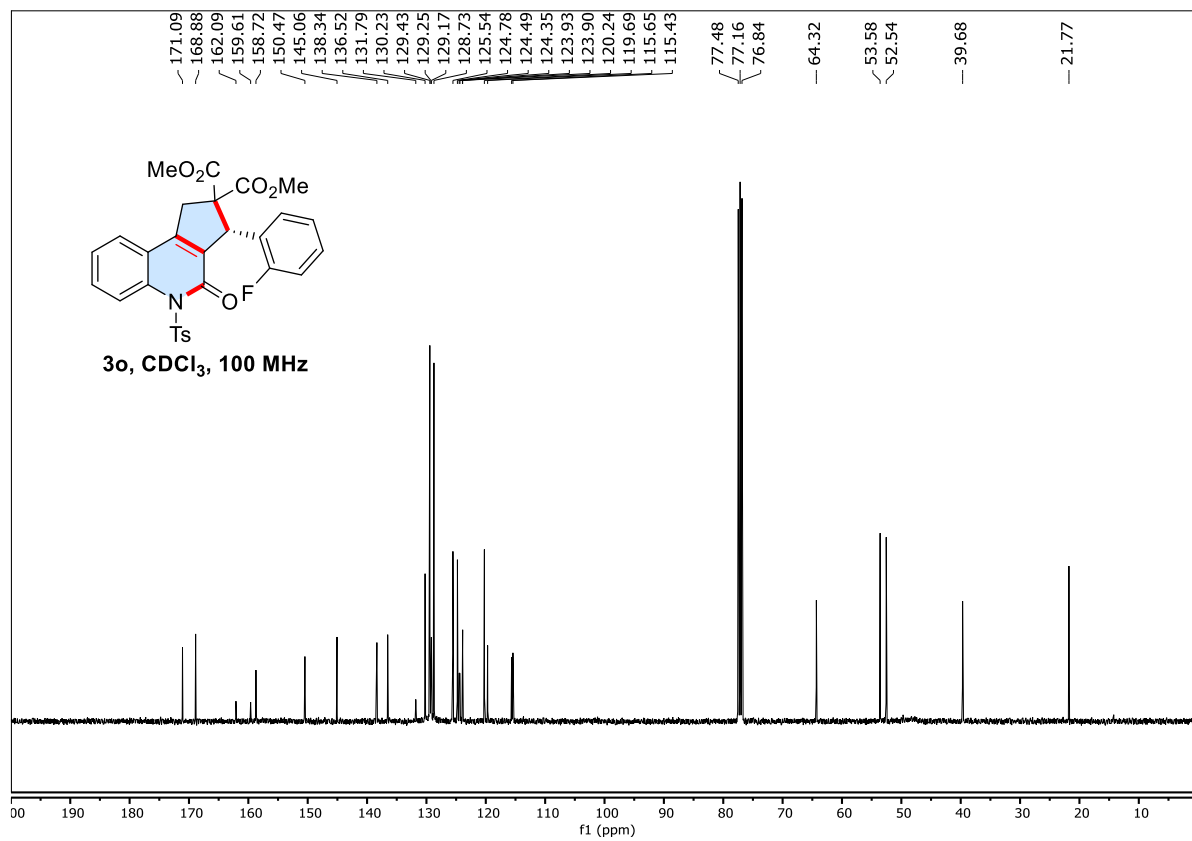

**Dimethyl (*R*)-3-(3,4-dichlorophenyl)-4-oxo-5-tosyl-1,3,4,5-tetrahydro-2*H*-cyclopenta[*c*]quinoline-2,2-dicarboxylate (**3p**)**

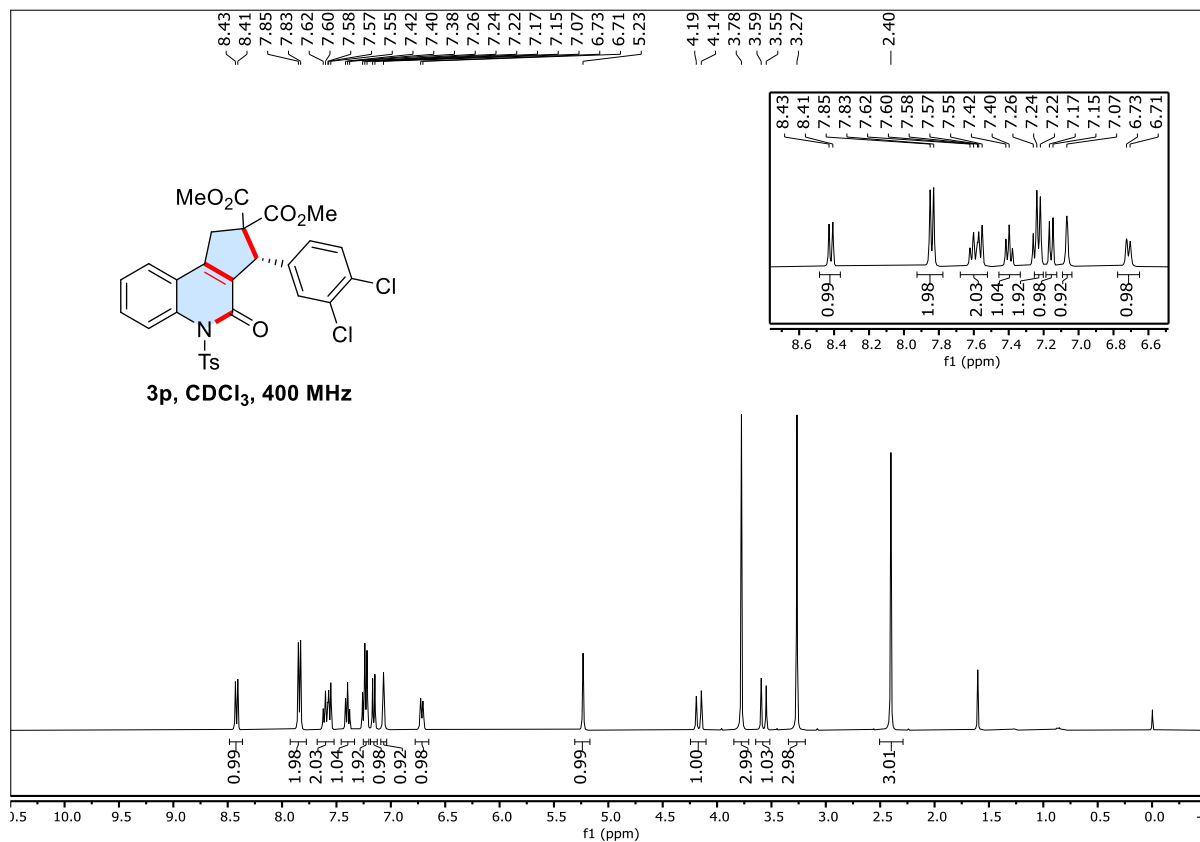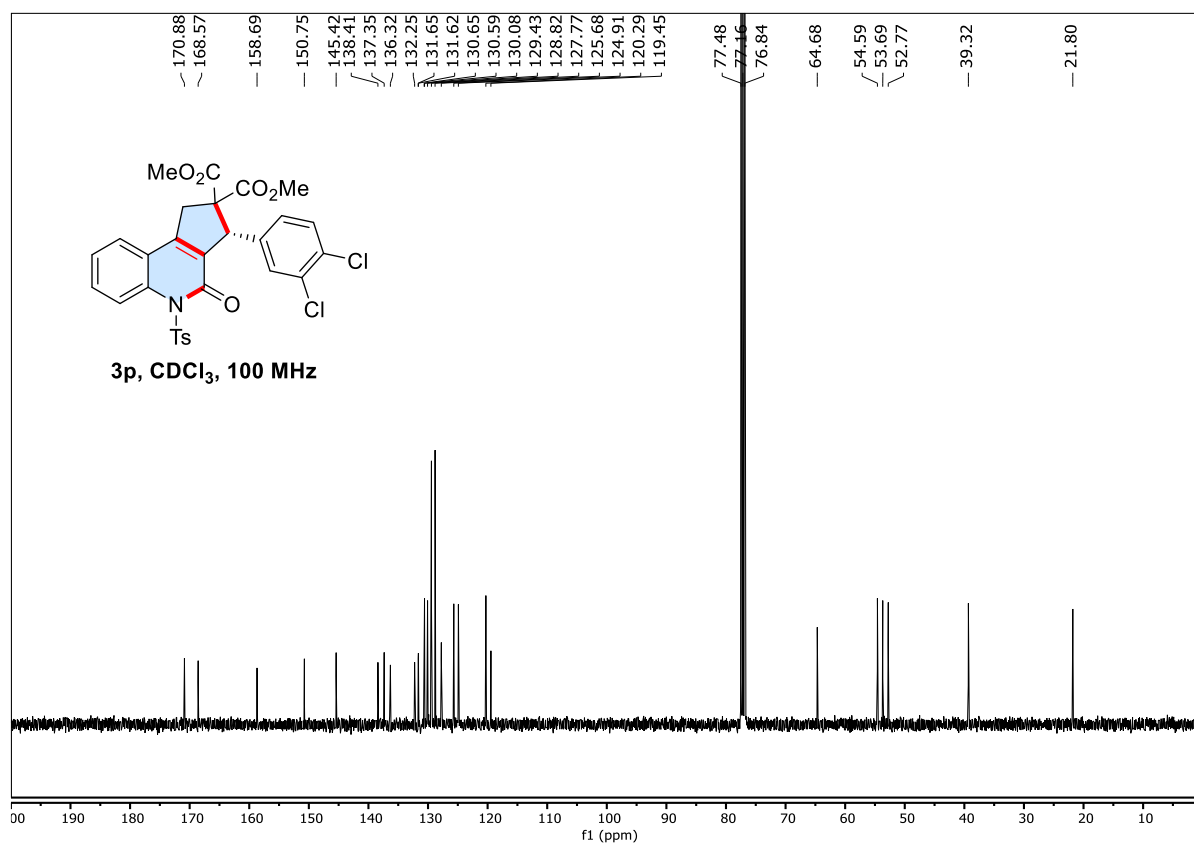

**Dimethyl (*R*)-3-(naphthalen-2-yl)-4-oxo-5-tosyl-1,3,4,5-tetrahydro-2*H*-cyclopenta[*c*]quinoline-2,2-dicarboxylate (**3q**)**

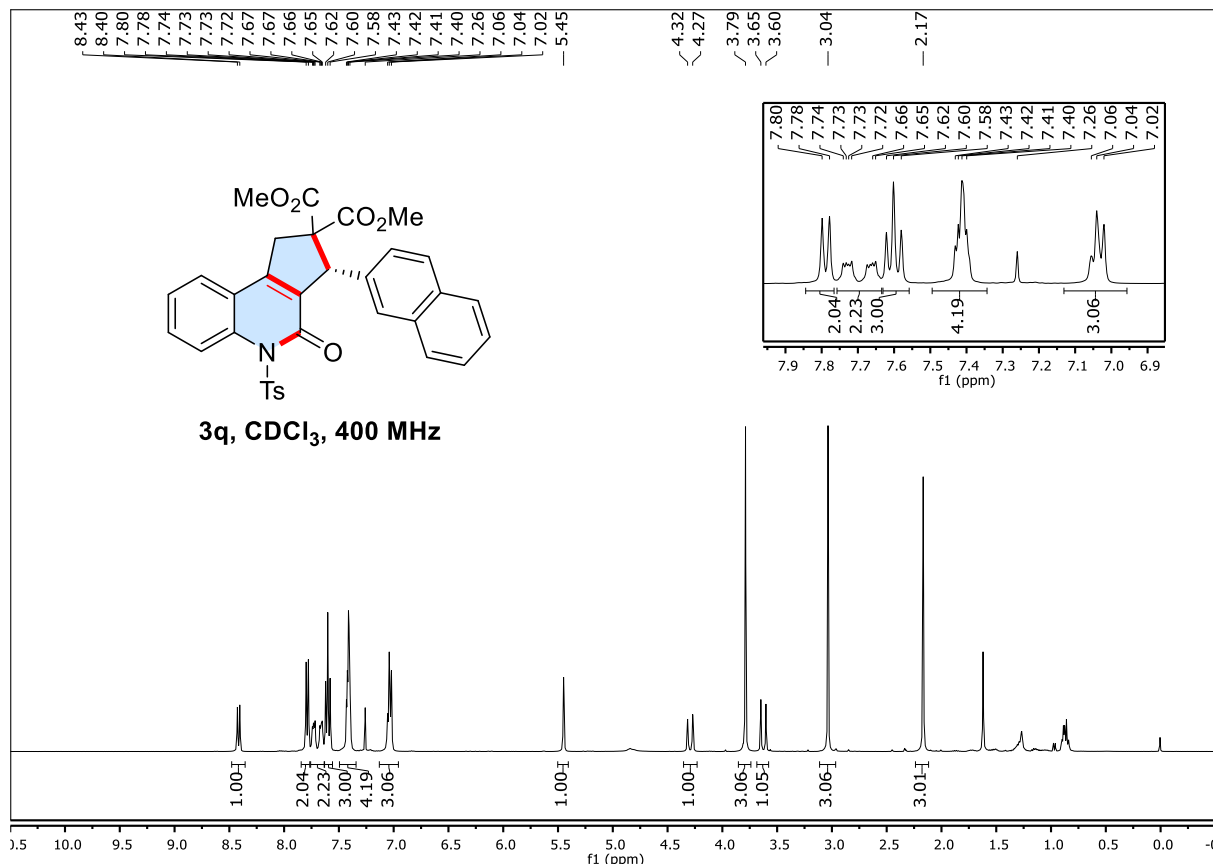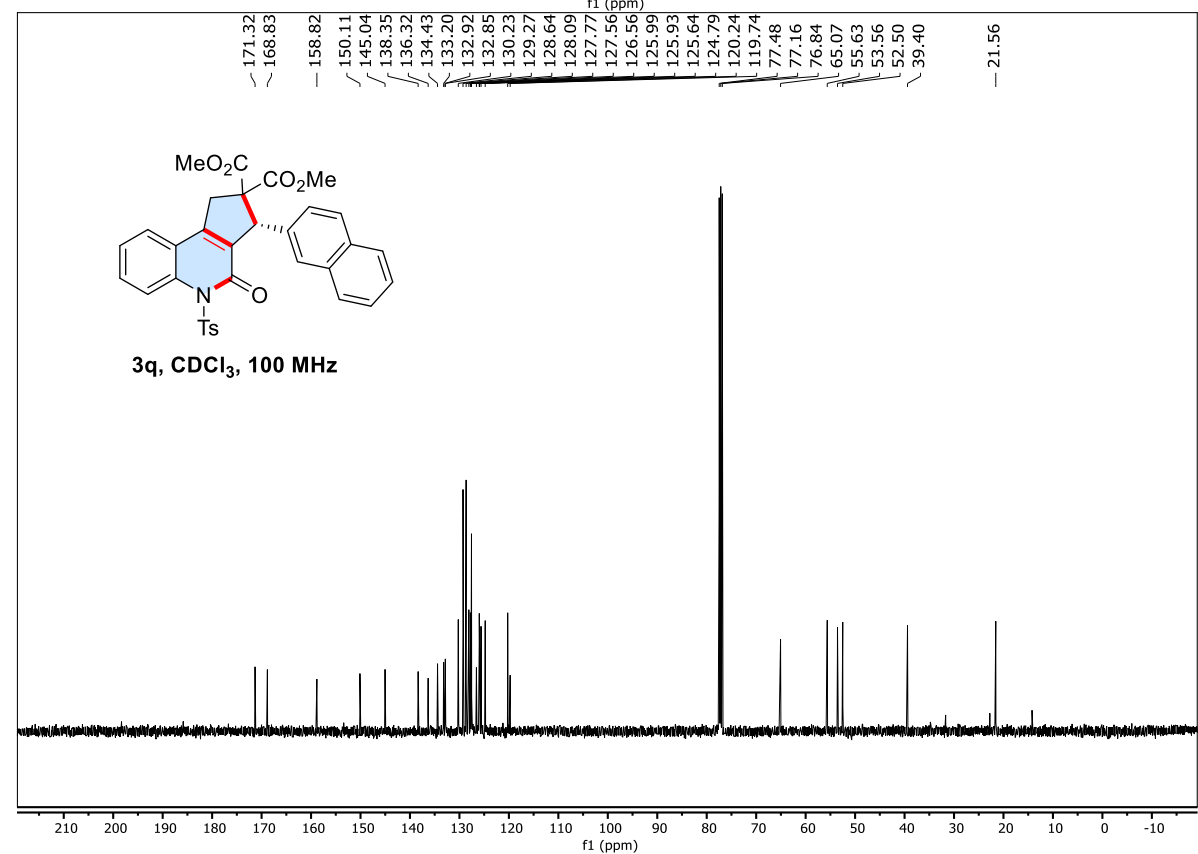

**Dimethyl (*R*)-4-oxo-3-(thiophen-3-yl)-5-tosyl-1,3,4,5-tetrahydro-2*H*-cyclopenta[*c*]quinoline-2,2-dicarboxylate (**3r**)**

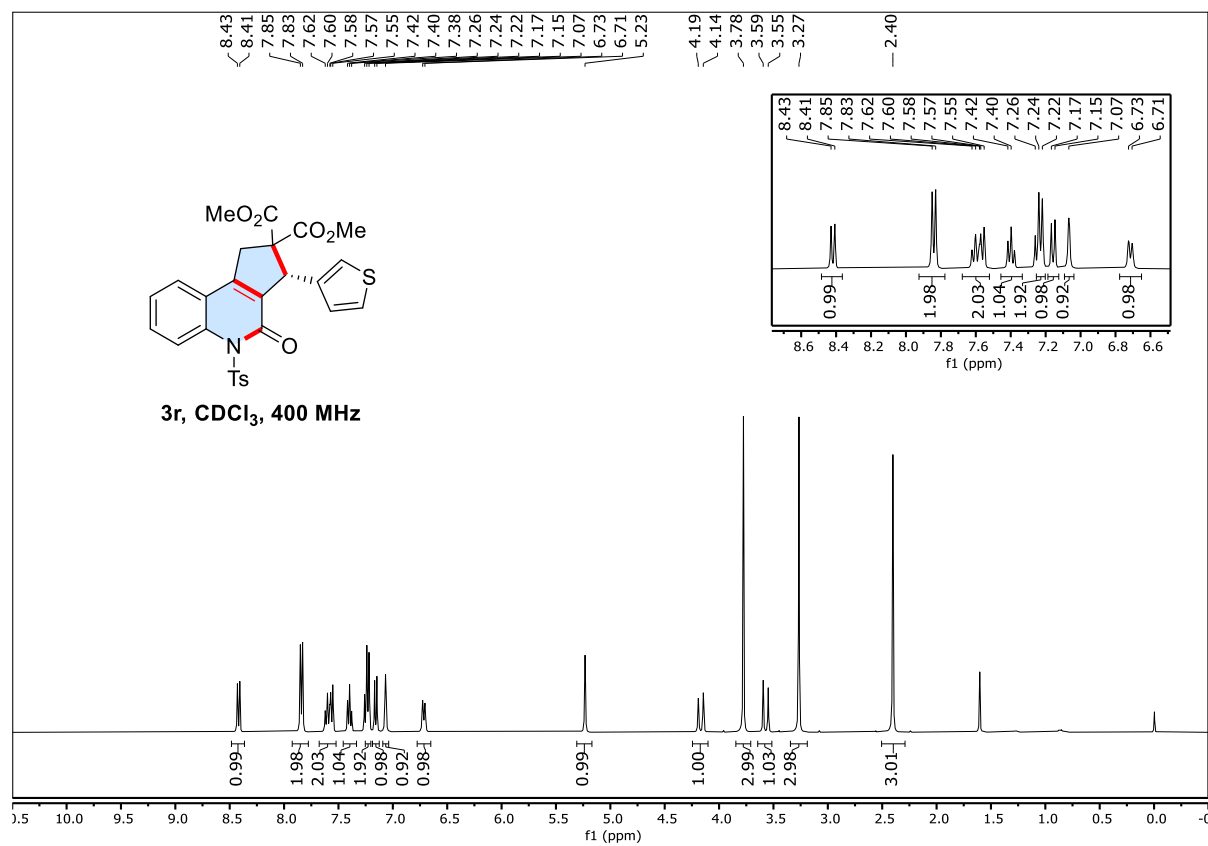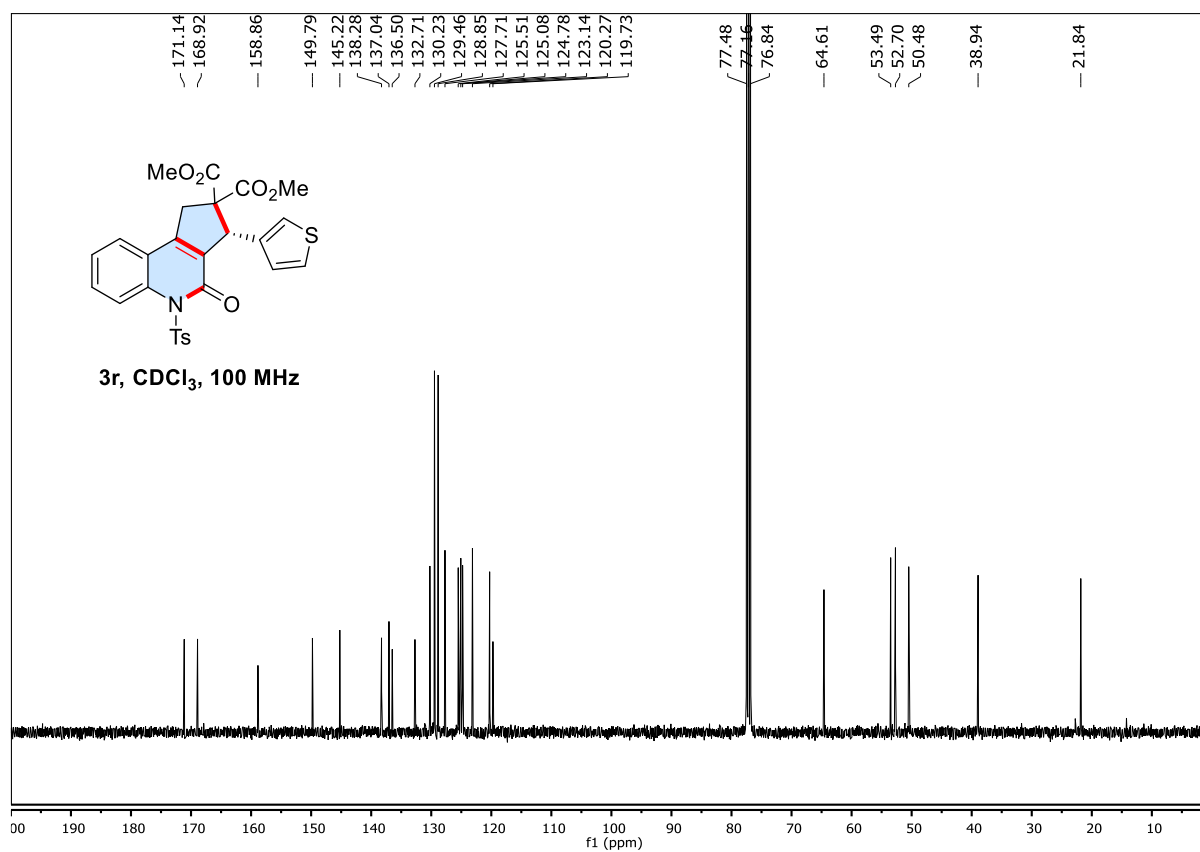

**Dimethyl (*R*)-3-ethyl-4-oxo-5-tosyl-1,3,4,5-tetrahydro-2*H*-cyclopenta[*c*]quinoline-2,2-dicarboxylate (**3s**)**

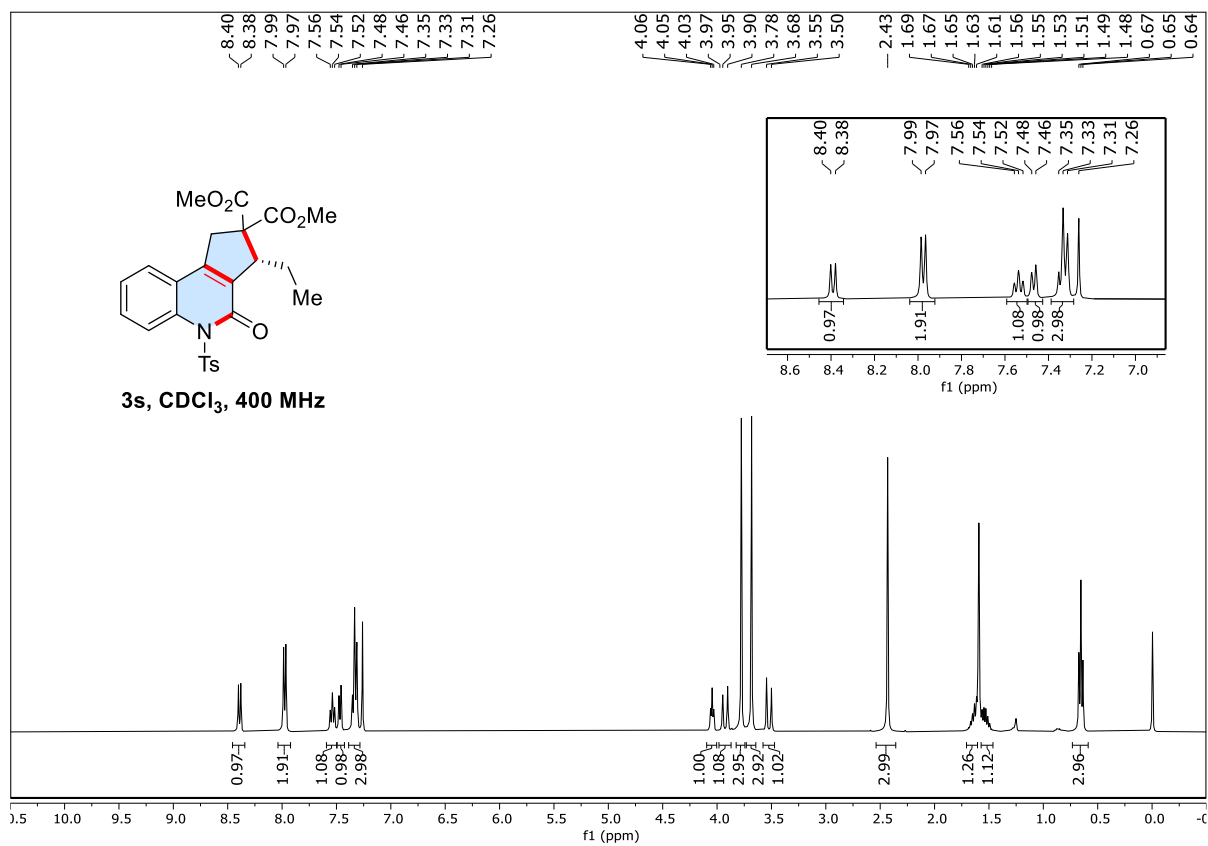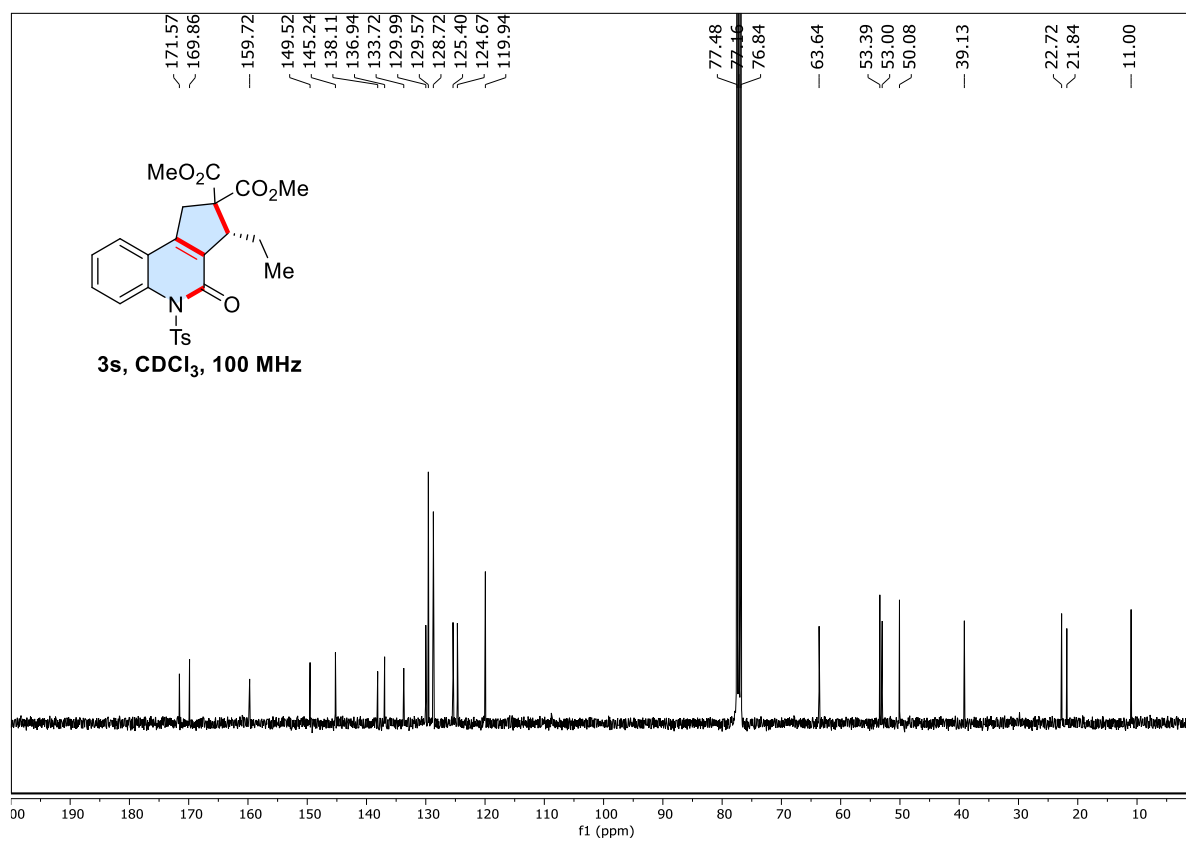





**Diisopropyl (*R*)-4-oxo-3-phenyl-5-tosyl-1,3,4,5-tetrahydro-2*H*-cyclopenta[*c*]quinoline-2,2-dicarboxylate (**3u**)**

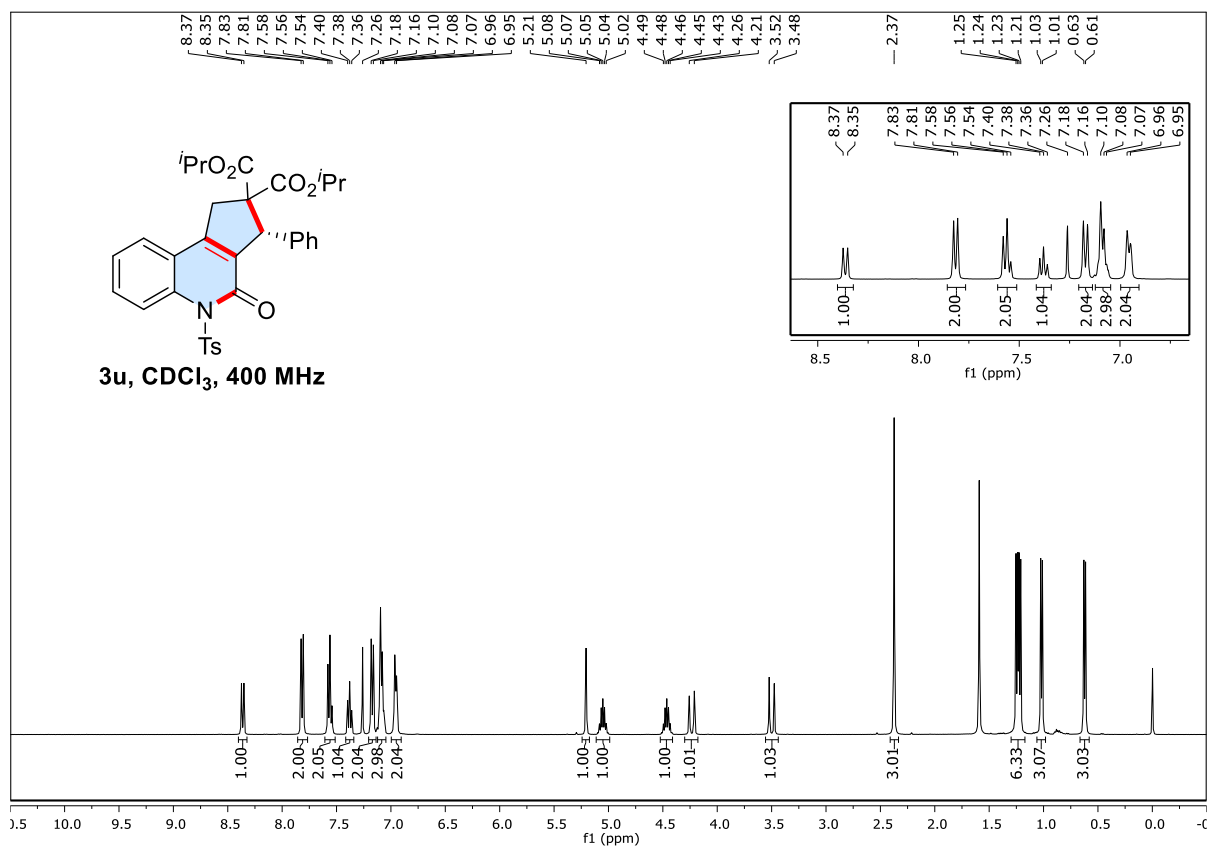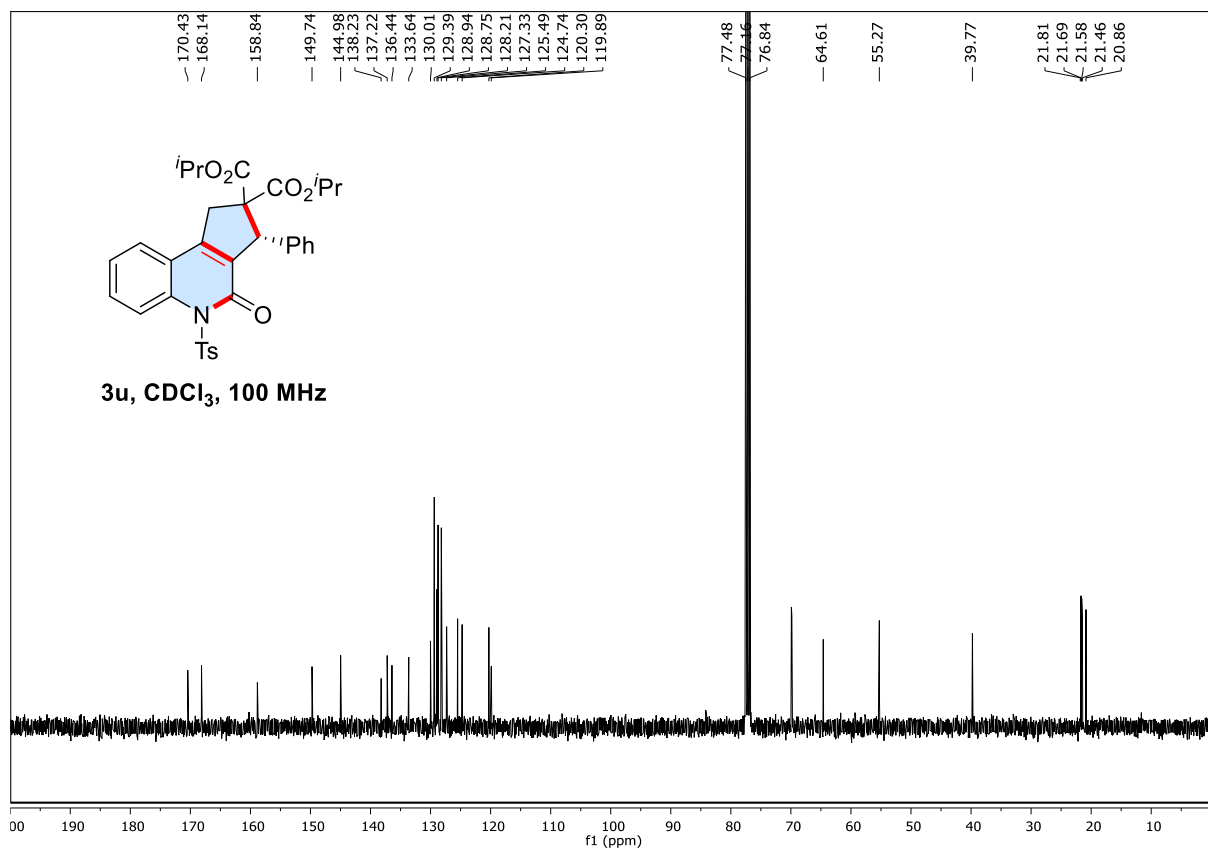

**Dibenzyl (*R*)-4-oxo-3-phenyl-5-tosyl-1,3,4,5-tetrahydro-2*H*-cyclopenta[*c*]quinoline-2,2-dicarboxylate (**3v**)**

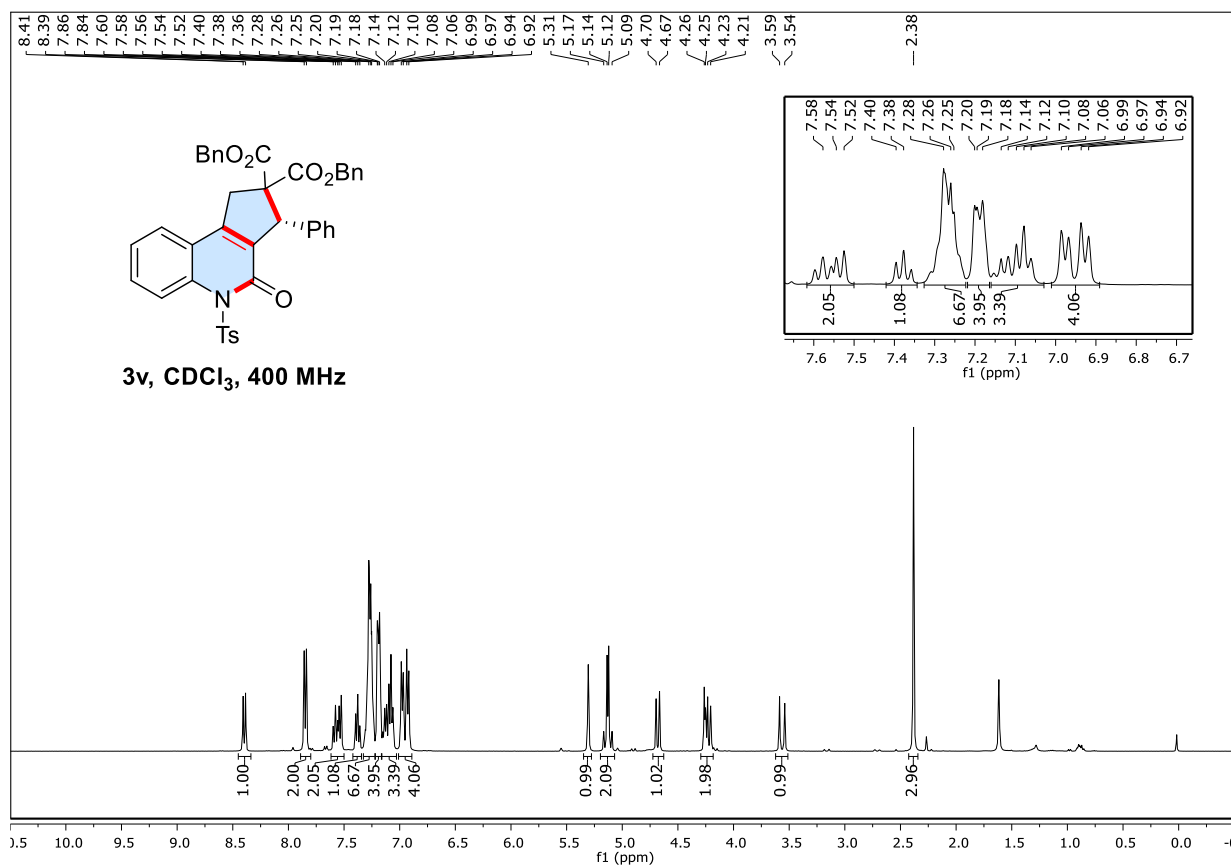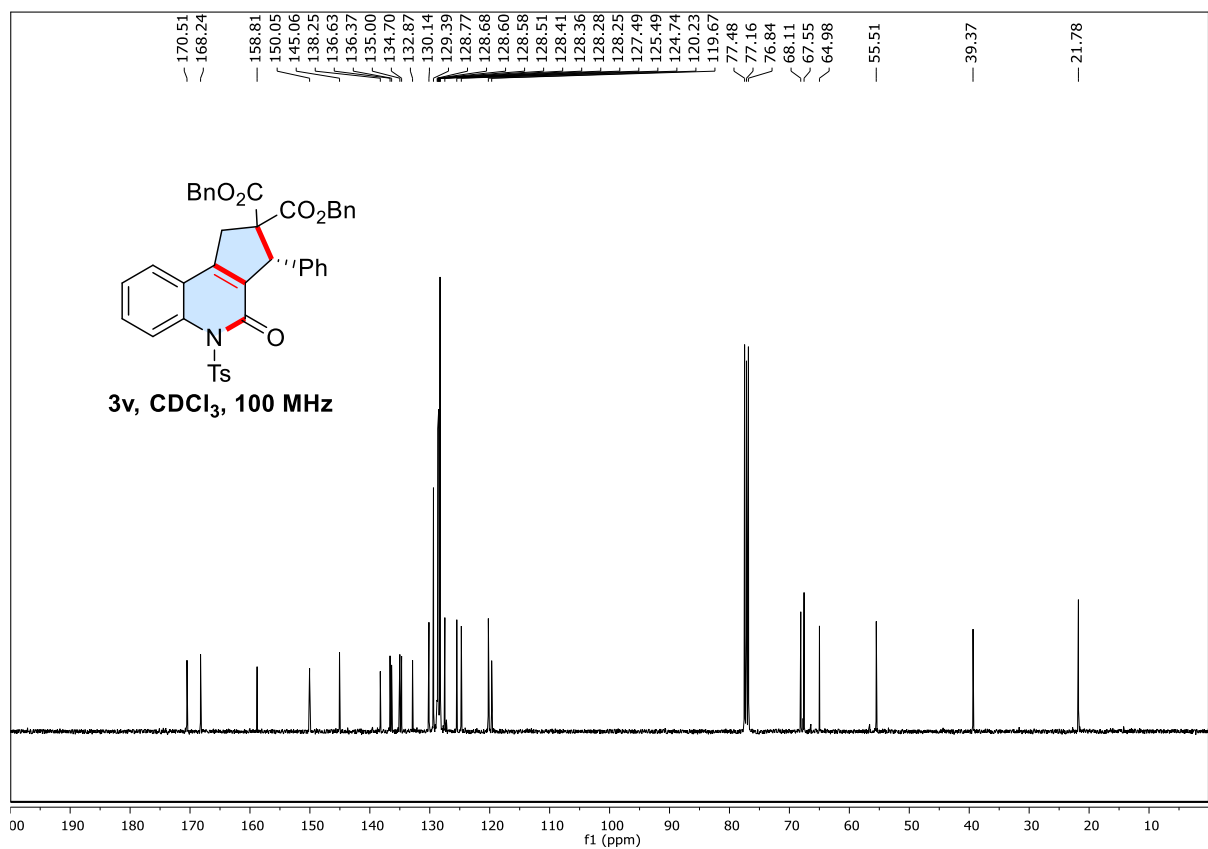

**Diallyl (*R*)-4-oxo-3-phenyl-5-tosyl-1,3,4,5-tetrahydro-2*H*-cyclopenta[*c*]quinoline-2,2-dicarboxylate (**3w**)**

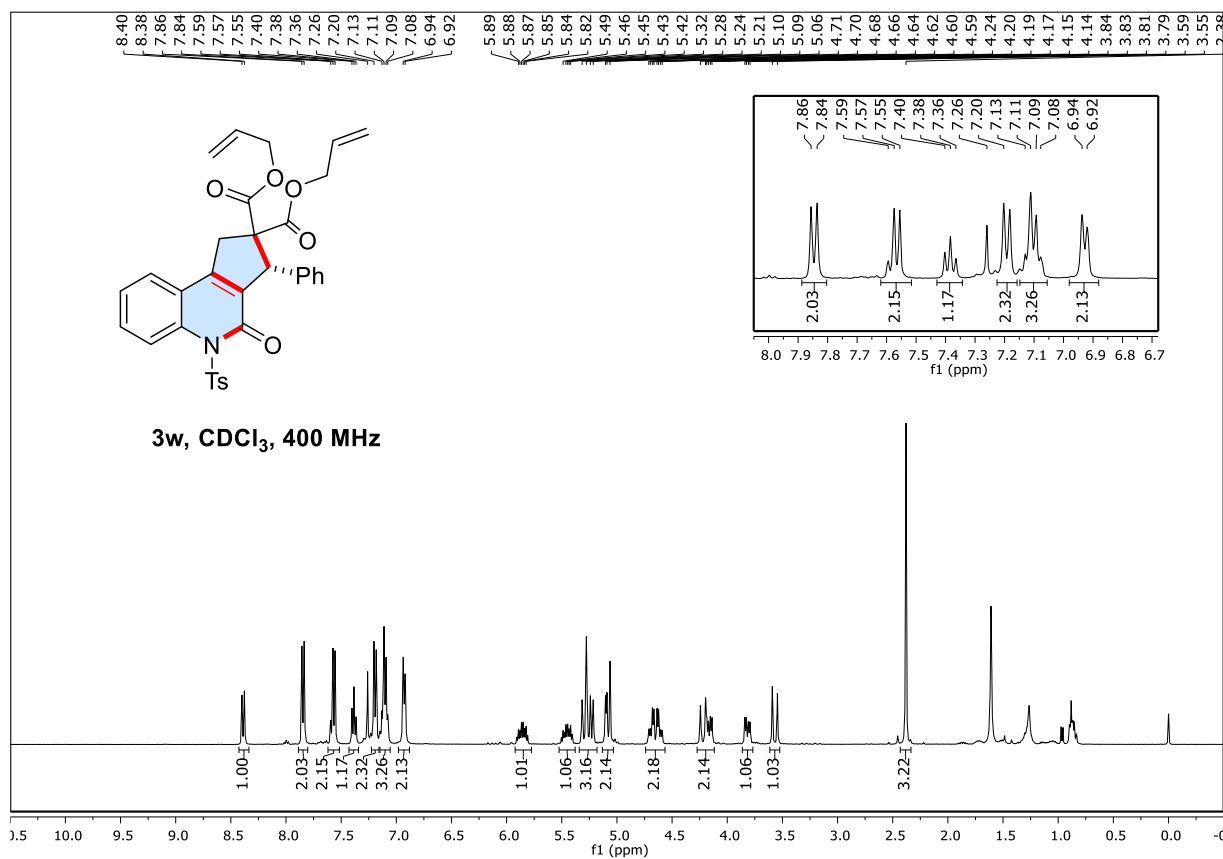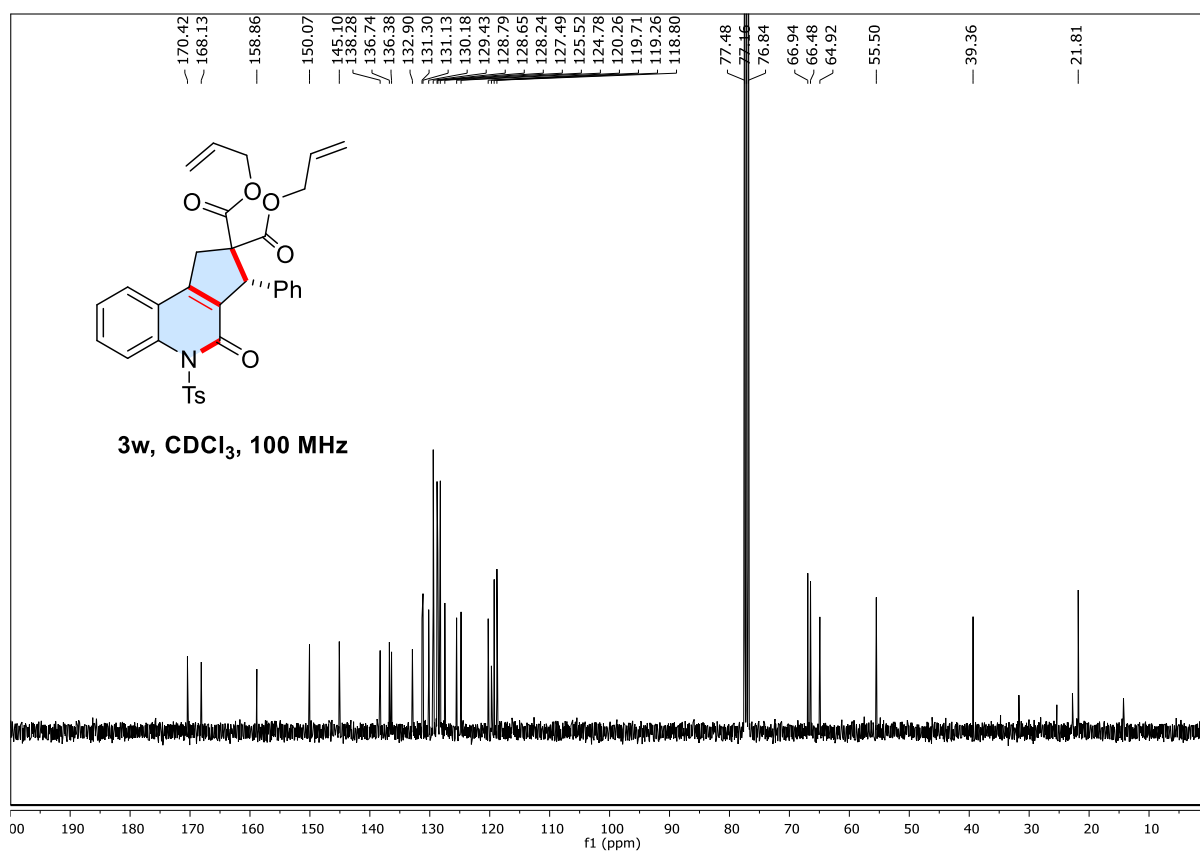

**Dimethyl (*R*)-5-((4-nitrophenyl)sulfonyl)-4-oxo-3-phenyl-1,3,4,5-tetrahydro-2*H*-cyclopenta[*c*]quinoline-2,2-dicarboxylate (**3x**)**

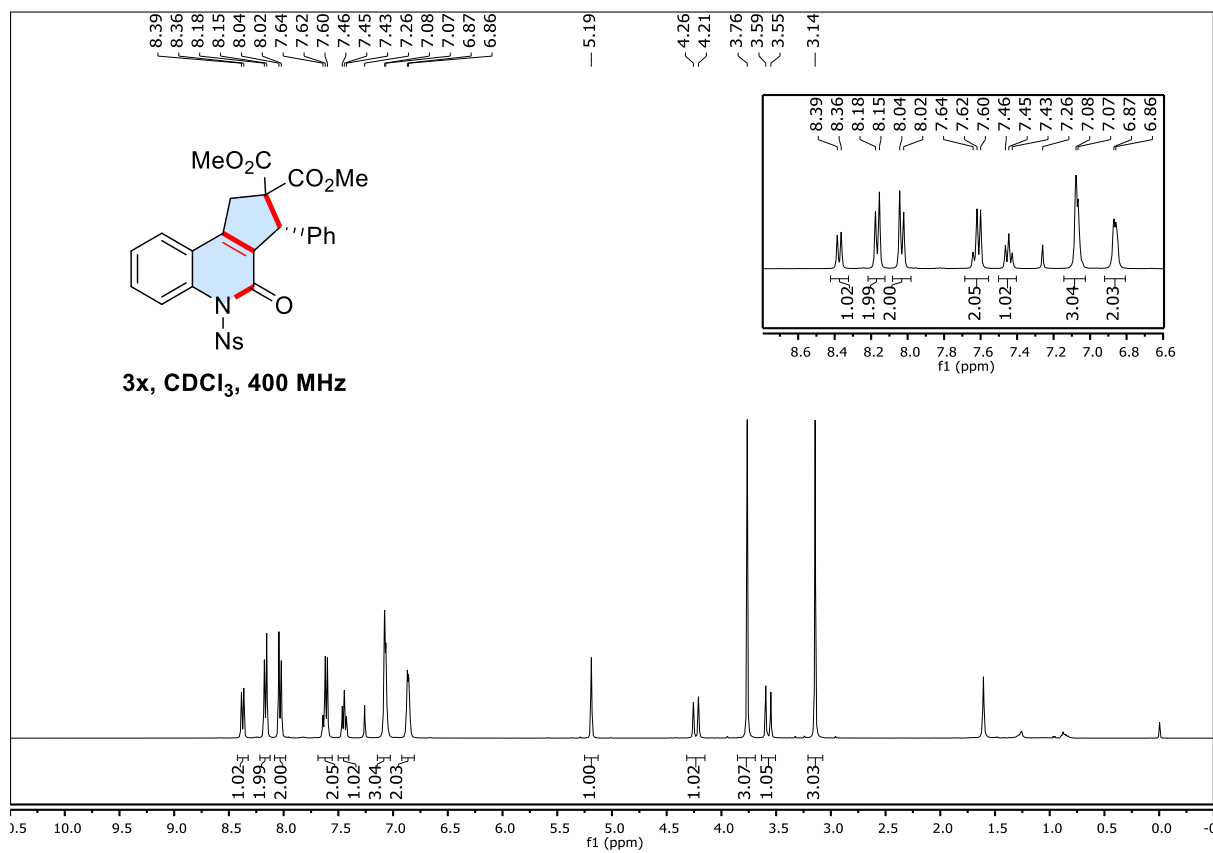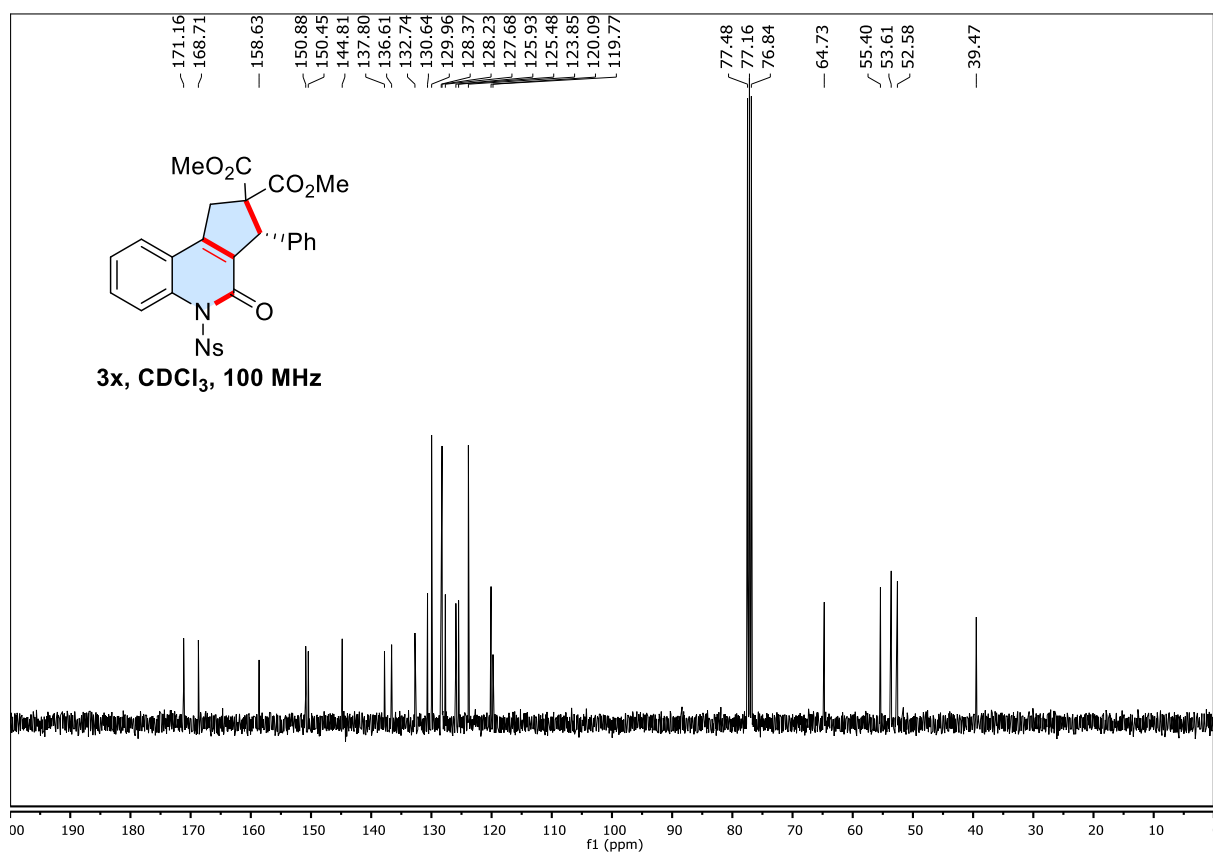

**Dimethyl (*R*)-5-(methylsulfonyl)-4-oxo-3-phenyl-1,3,4,5-tetrahydro-2*H*-cyclopenta[*c*]quinoline-2,2-dicarboxylate (**3y**)**

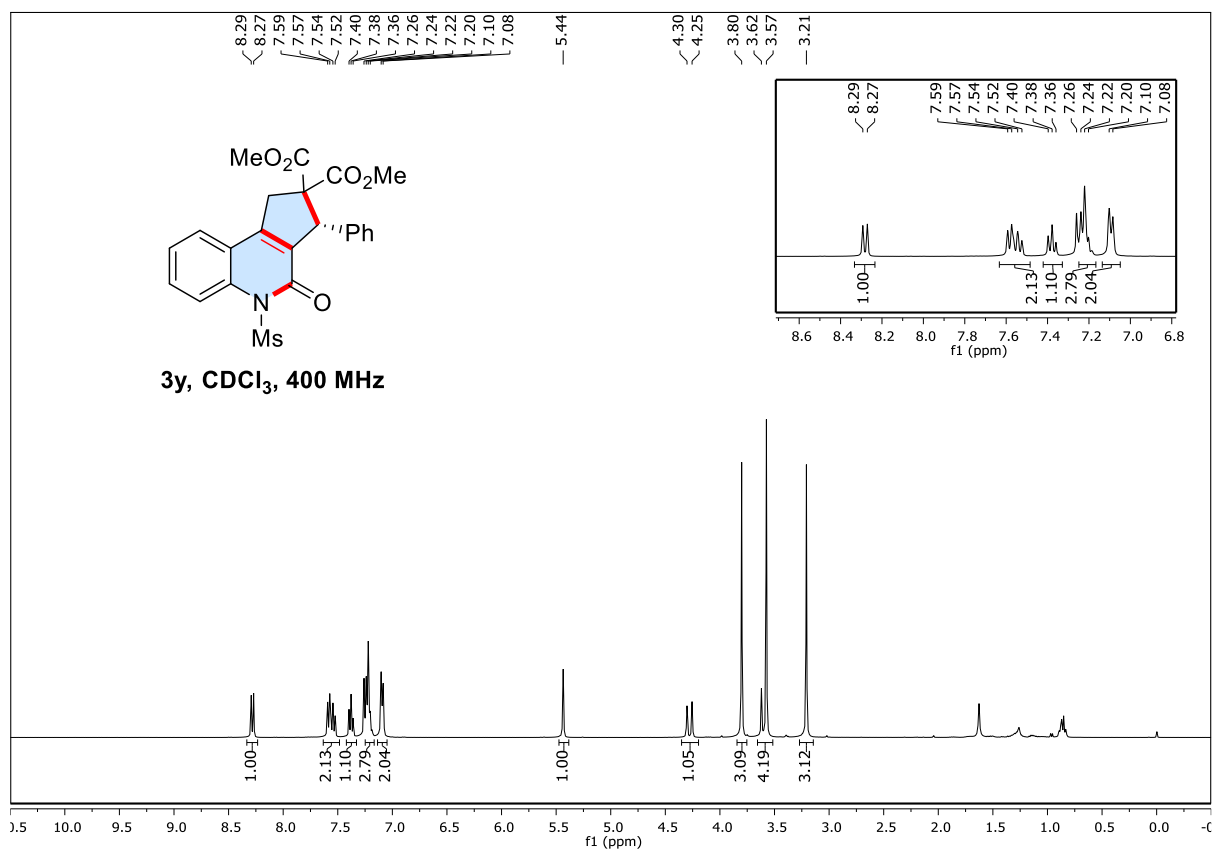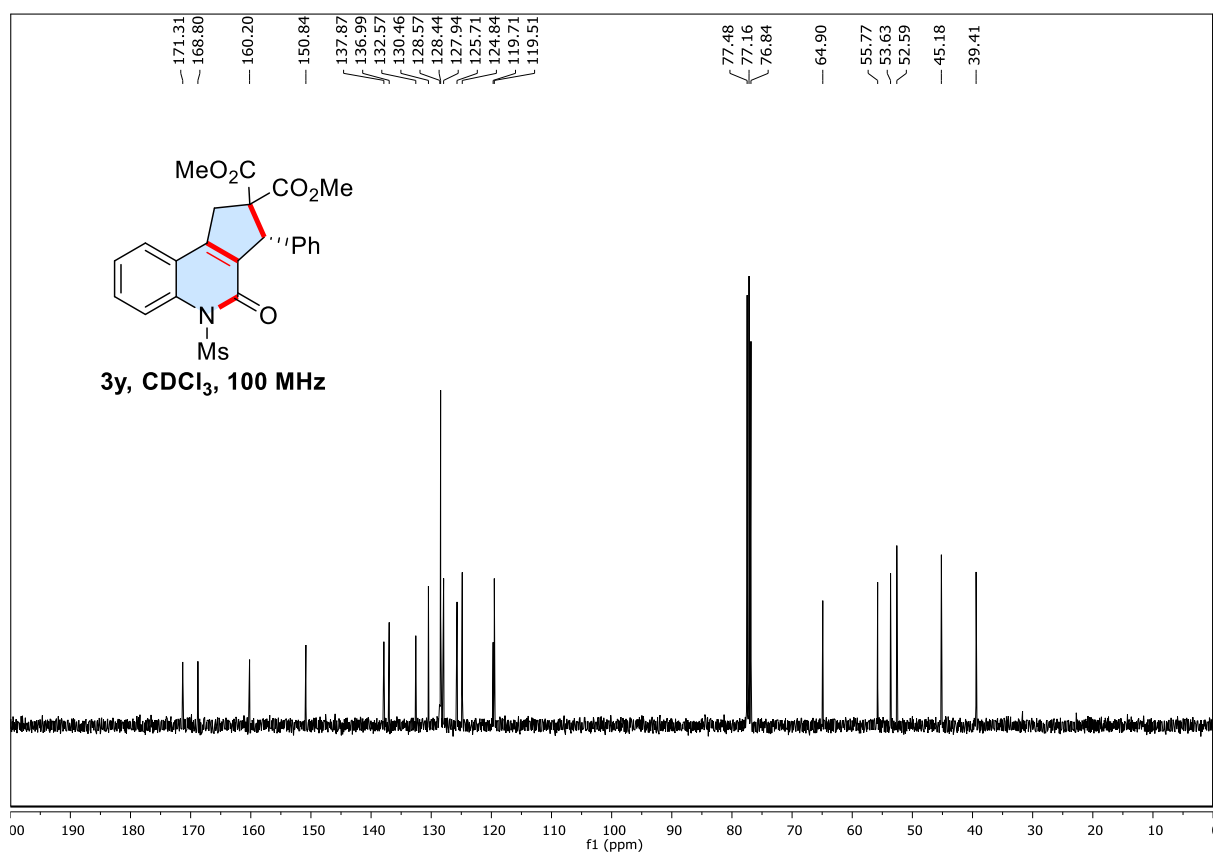

**Dimethyl (*R*)-4-oxo-3-phenyl-5-tosyl-1,3,4,5-tetrahydro-2*H*-cyclopenta[*c*][1,3]dioxolo [4,5-*g*]quinoline-2,2-dicarboxylate (**3z**)**

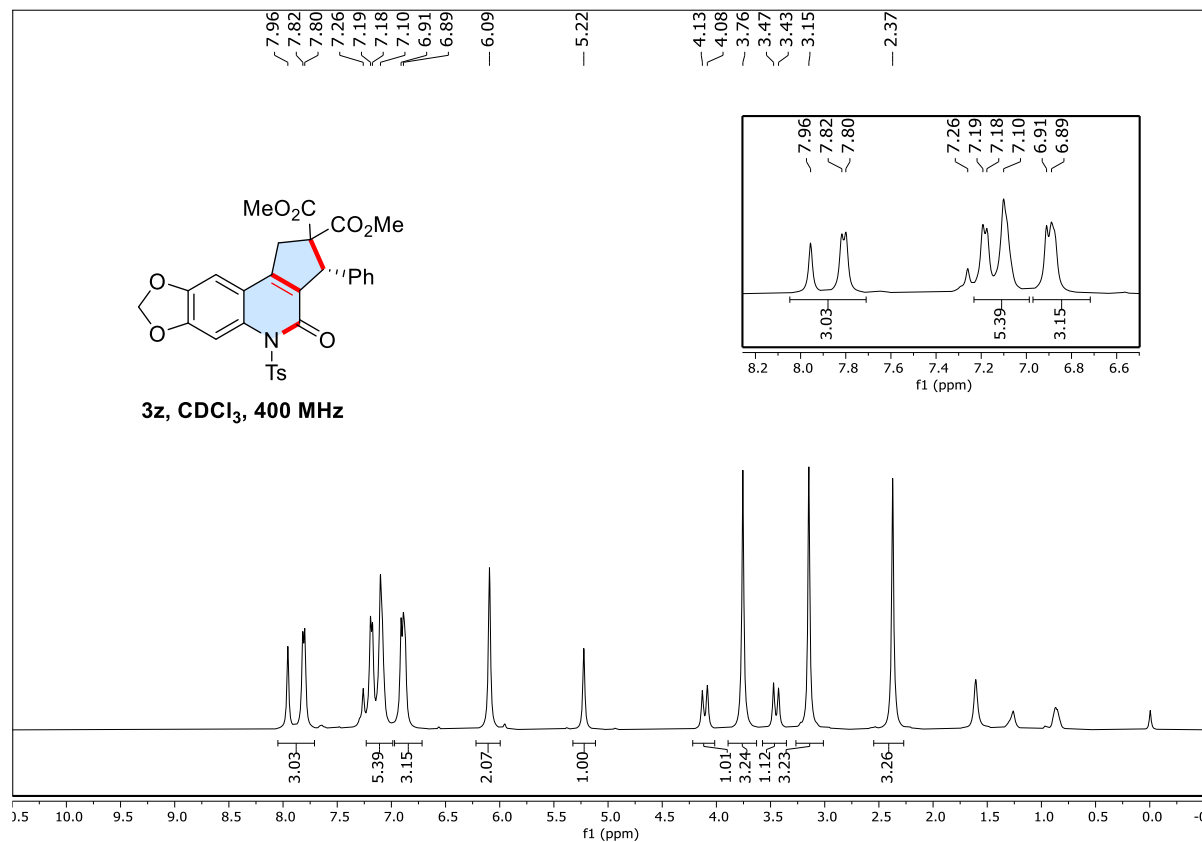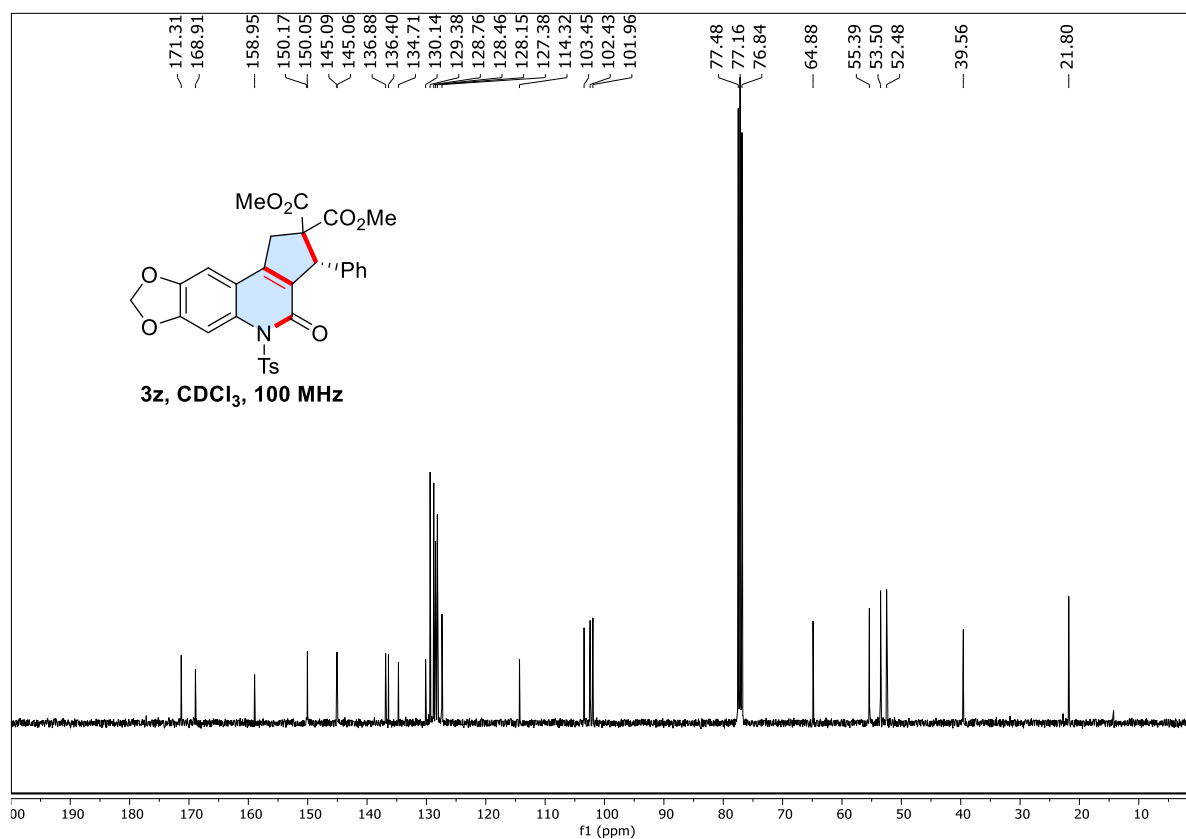

**Dimethyl (*R*)-8-chloro-4-oxo-3-phenyl-5-tosyl-1,3,4,5-tetrahydro-2*H*-cyclopenta[*c*]quinoline-2,2-dicarboxylate (**3aa**)**

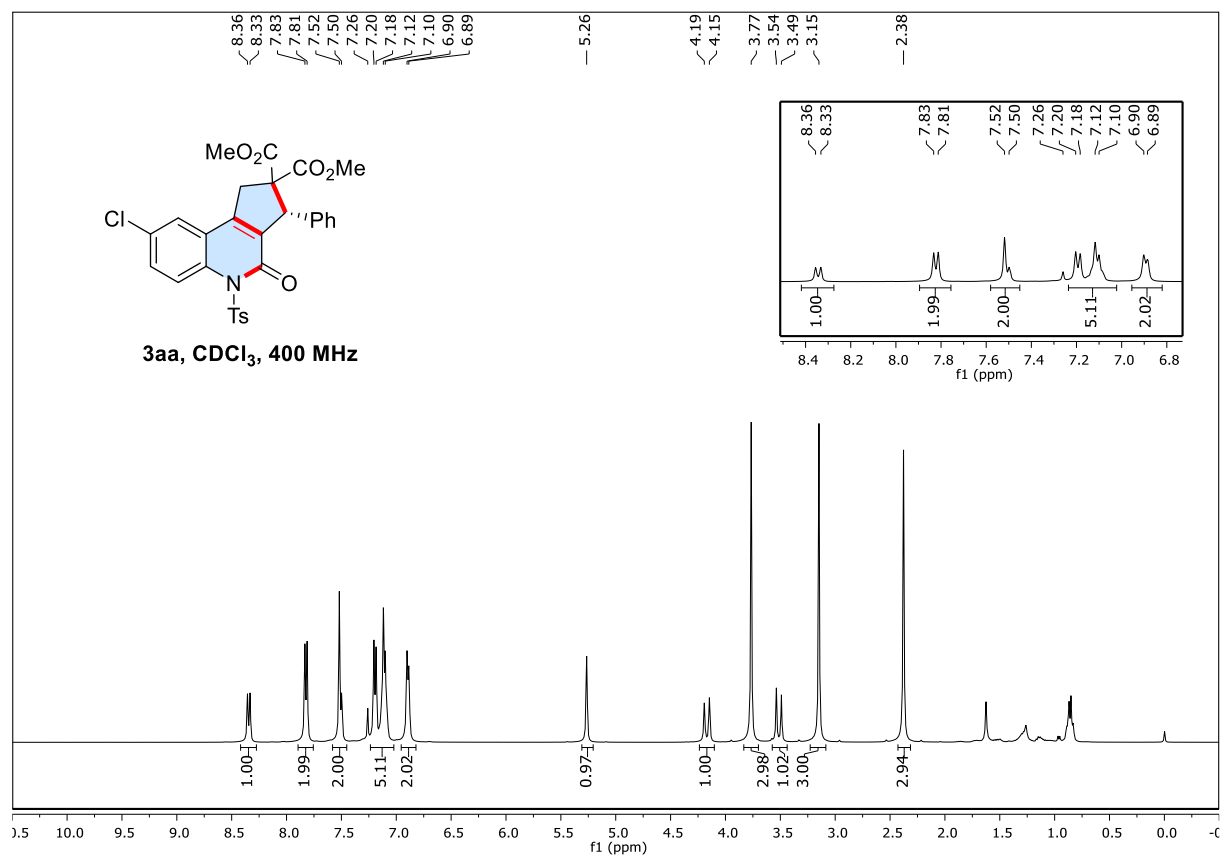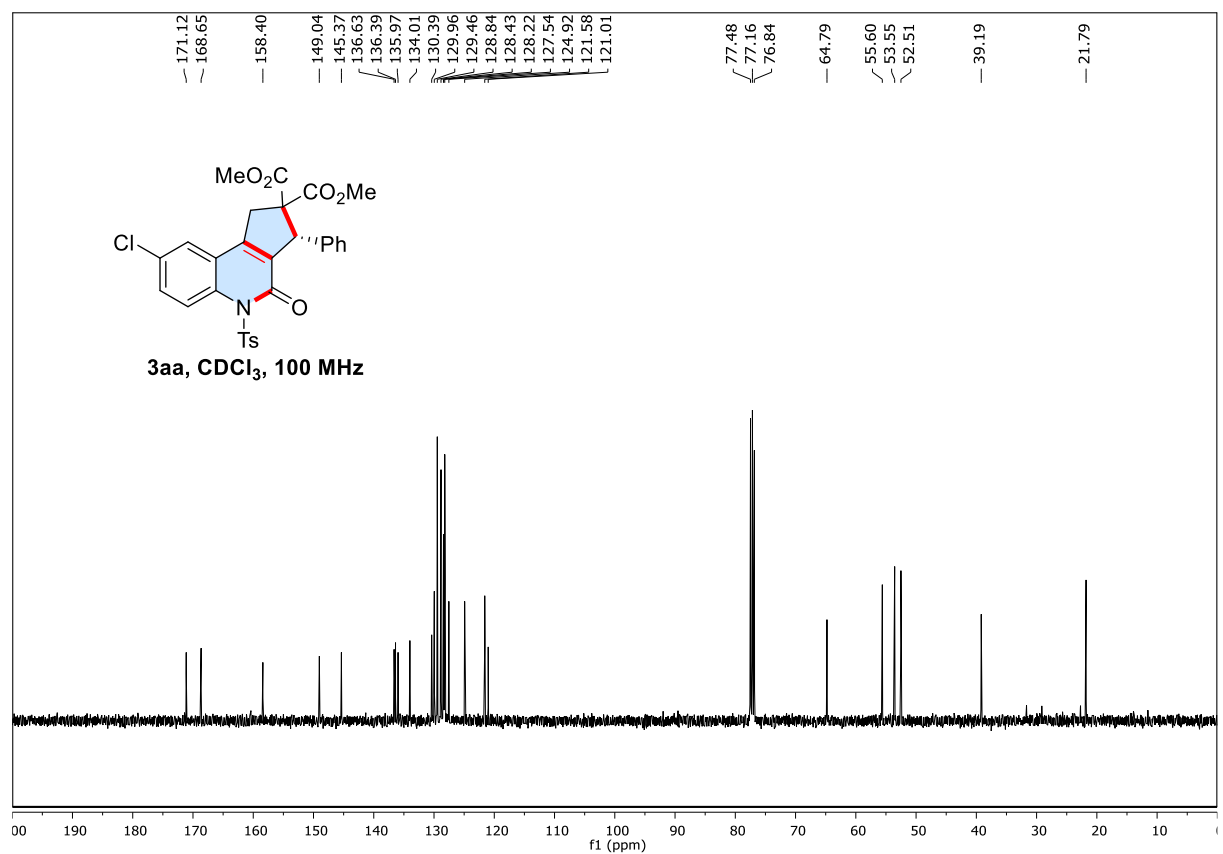

**Dimethyl (*R*)-8-methyl-4-oxo-3-phenyl-5-tosyl-1,3,4,5-tetrahydro-2*H*-cyclopenta[*c*]quinoline-2,2-dicarboxylate (**3ab**)**

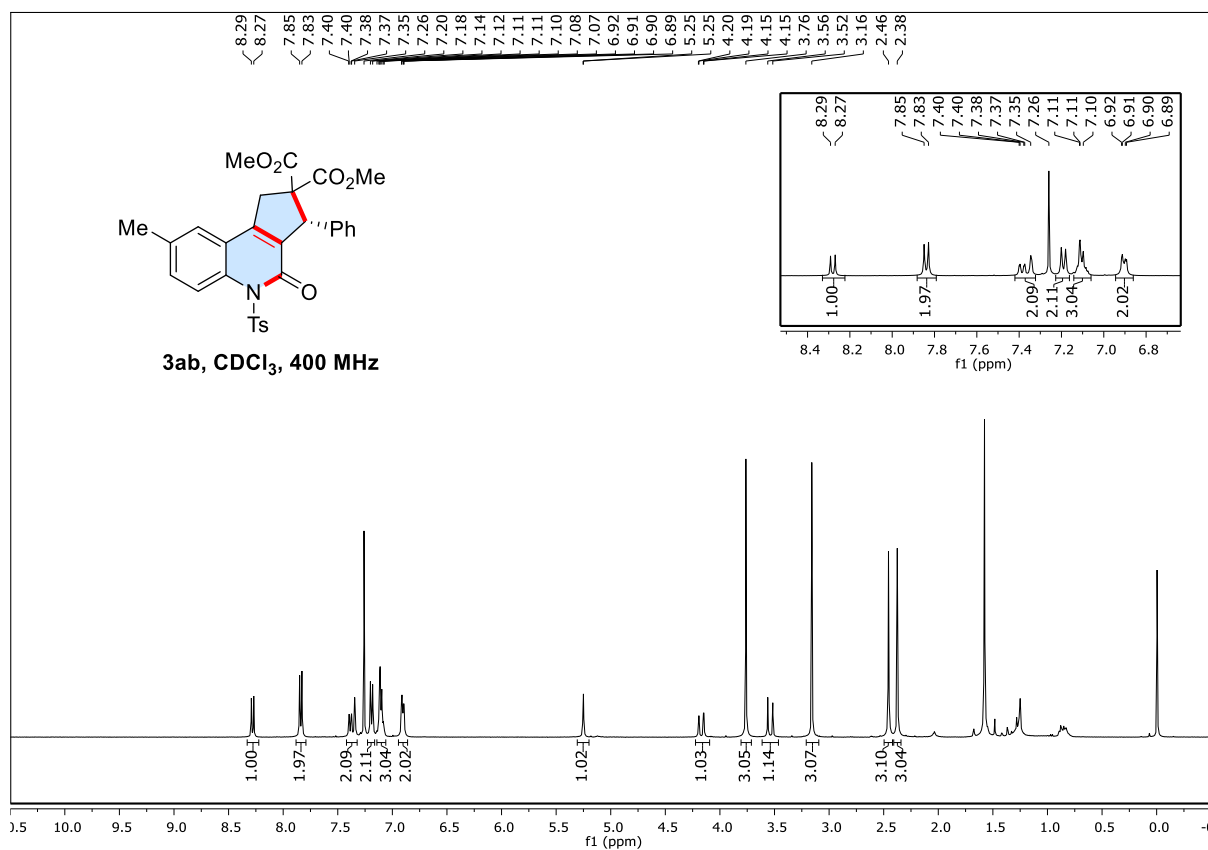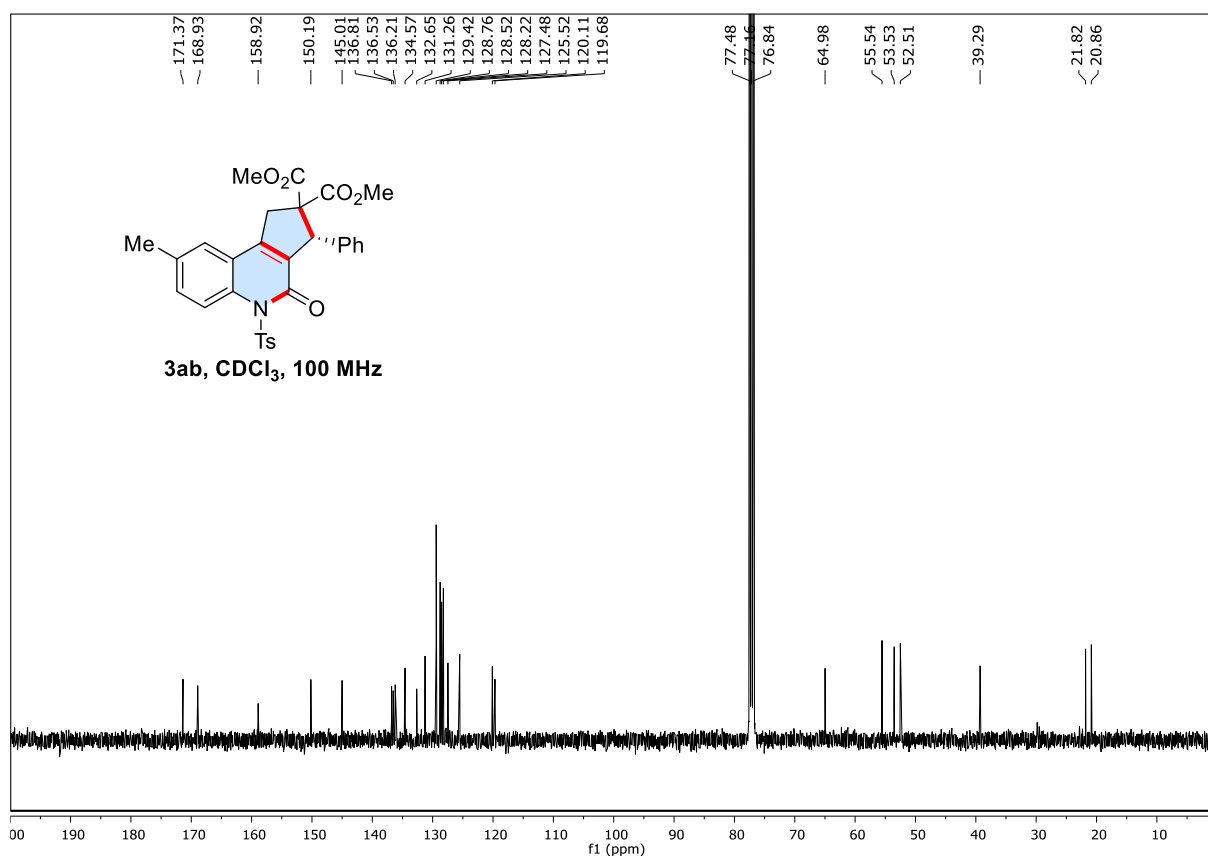



**Dimethyl (3*S*)-3a,9b-dihydroxy-4-oxo-3-phenyl-5-tosyl-1,3,3a,4,5,9b-hexahydro-2*H*-cyclopenta[*c*]quinoline-2,2-dicarboxylate (9a)**

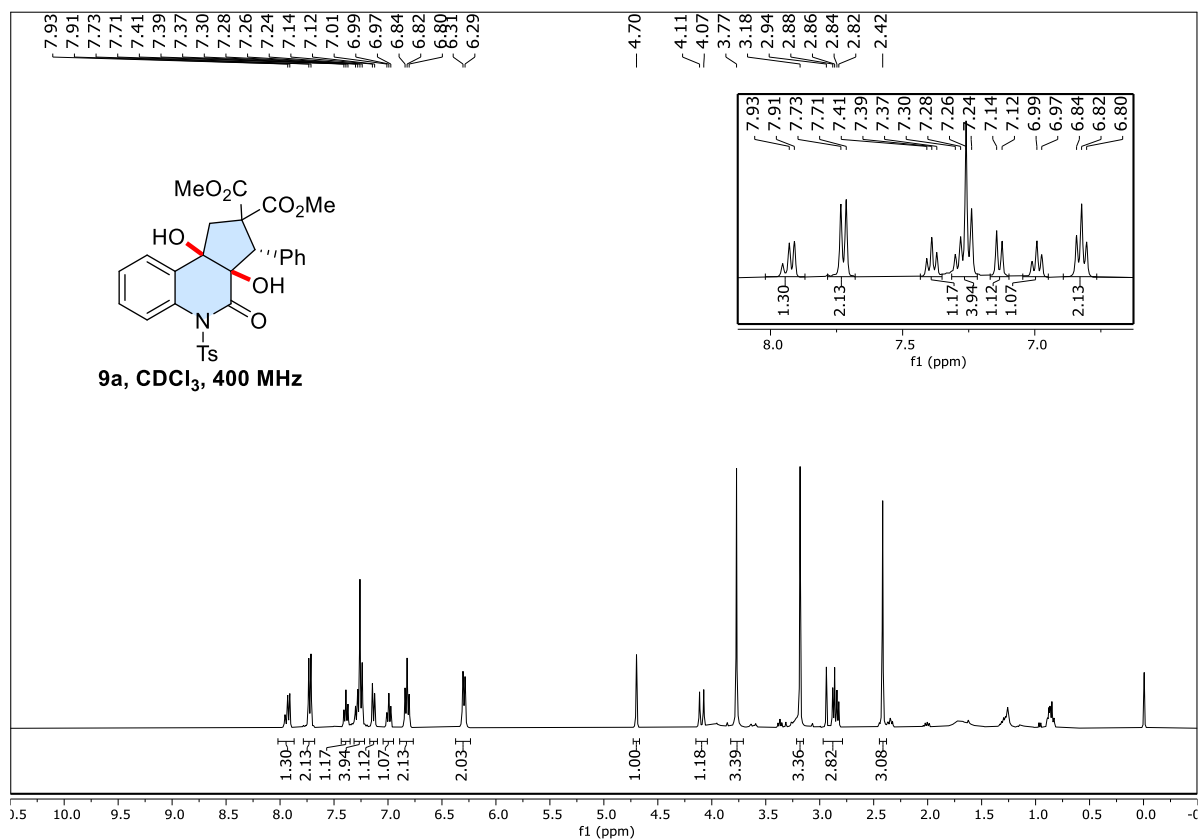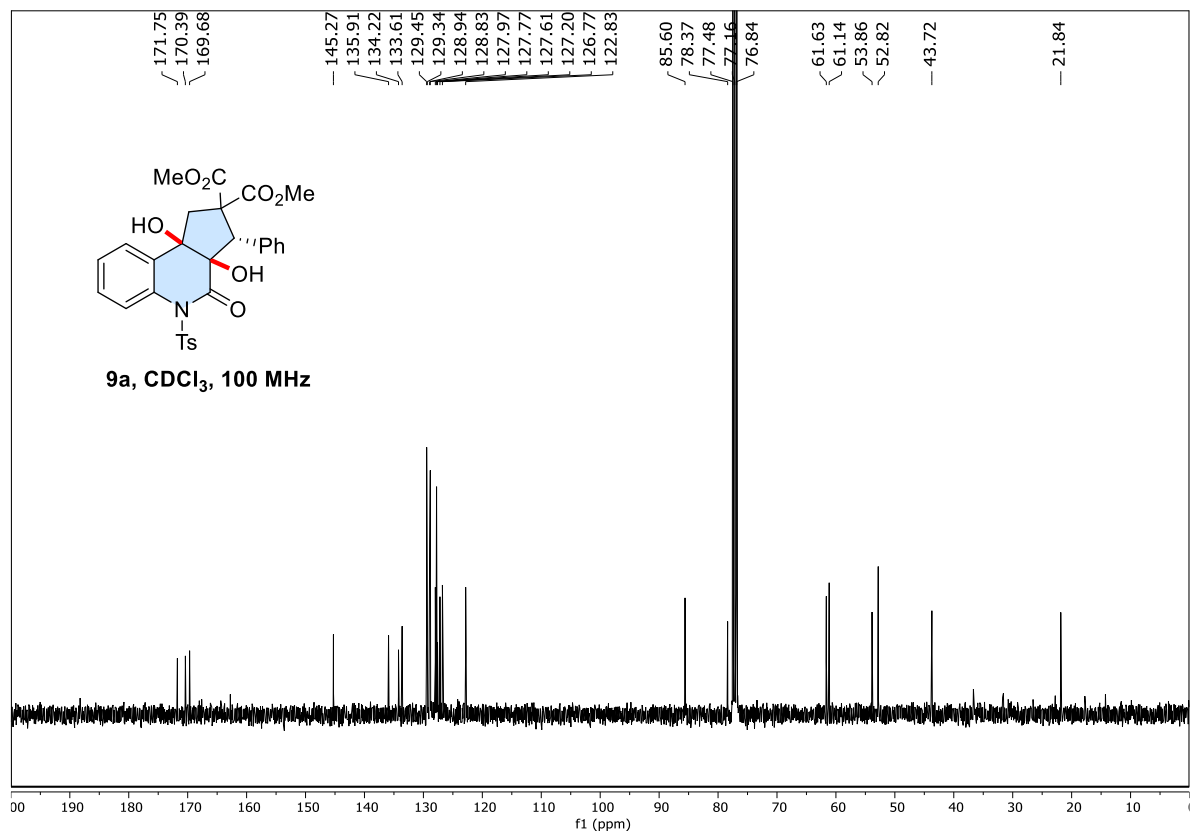

**Dimethyl (*R*)-3-phenyl-4-(tosyloxy)-1,3-dihydro-2*H*-cyclopenta[*c*]quinoline-2,2-dicarboxylate (10a)**

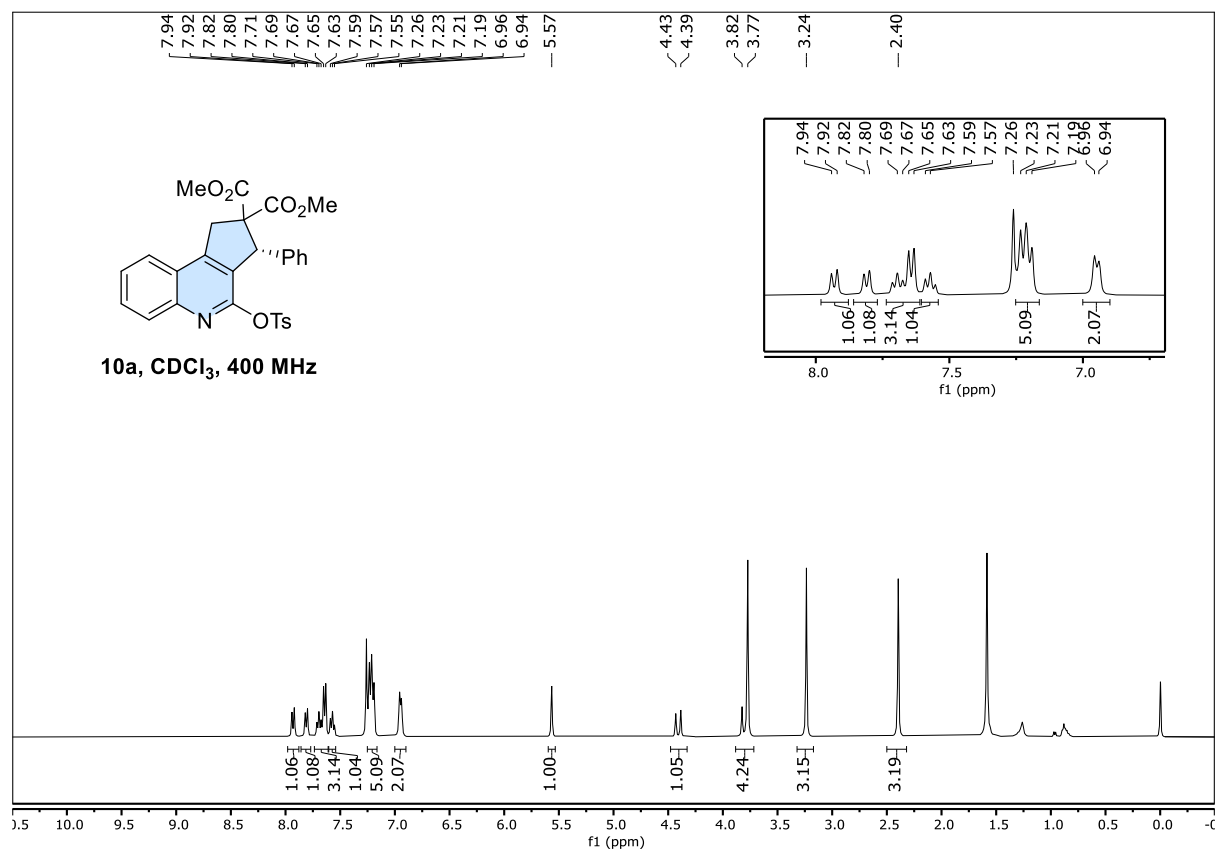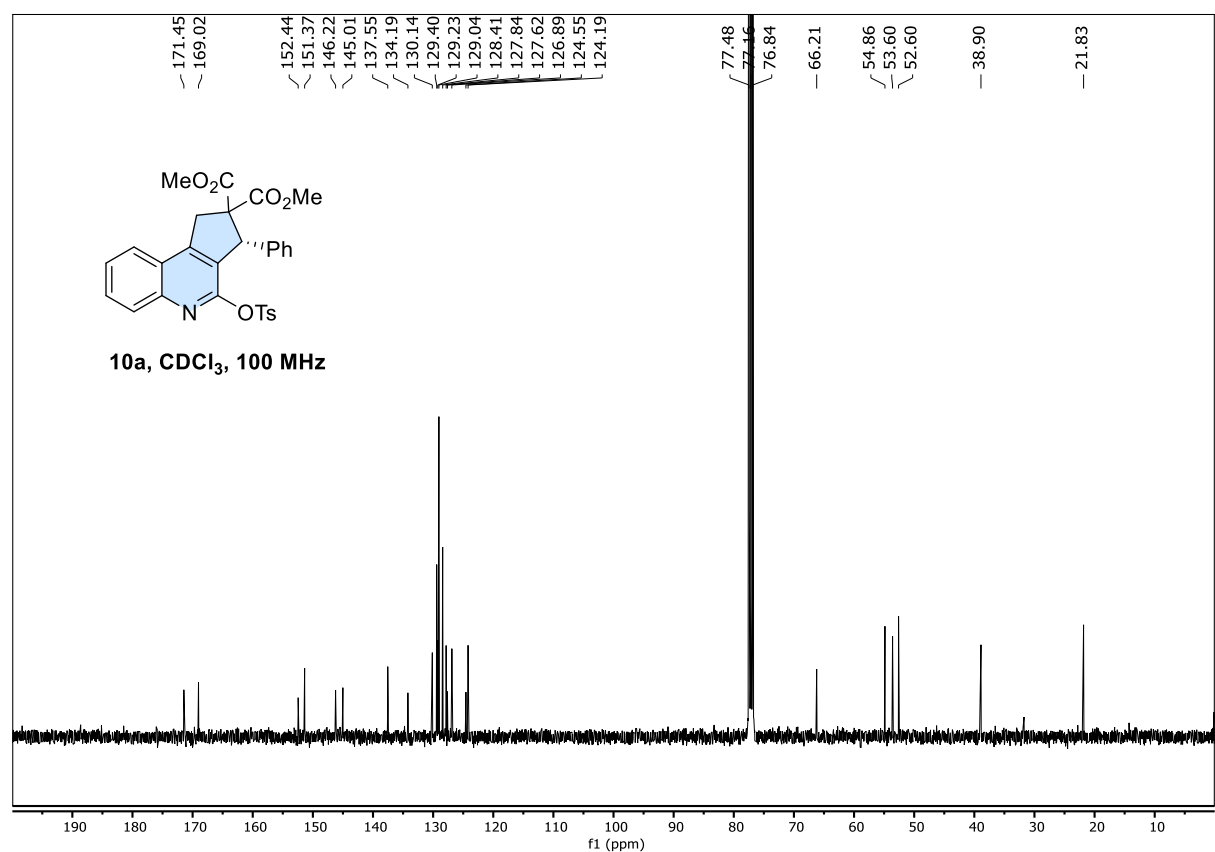

**Dimethyl (*R*)-4-oxo-3-phenyl-1,3,4,5-tetrahydro-2*H*-cyclopenta[*c*]quinoline-2,2-dicarboxylate (11a)**

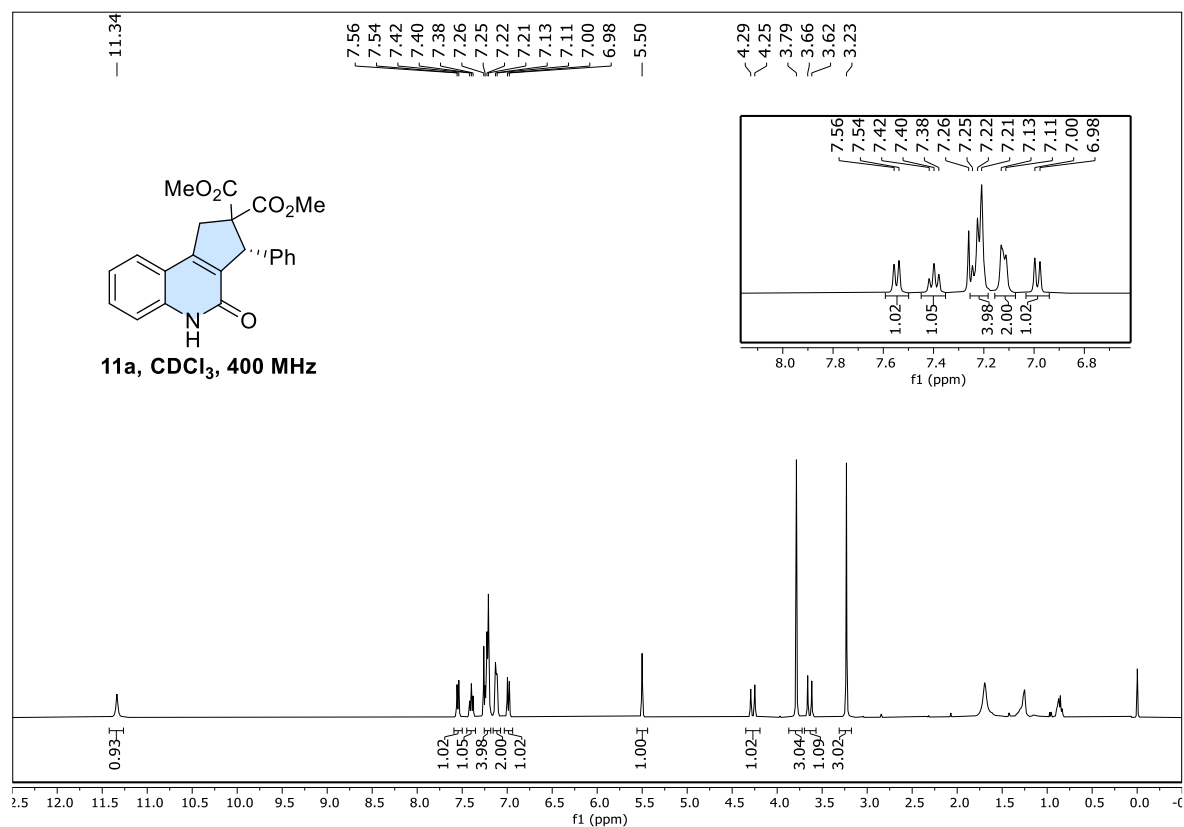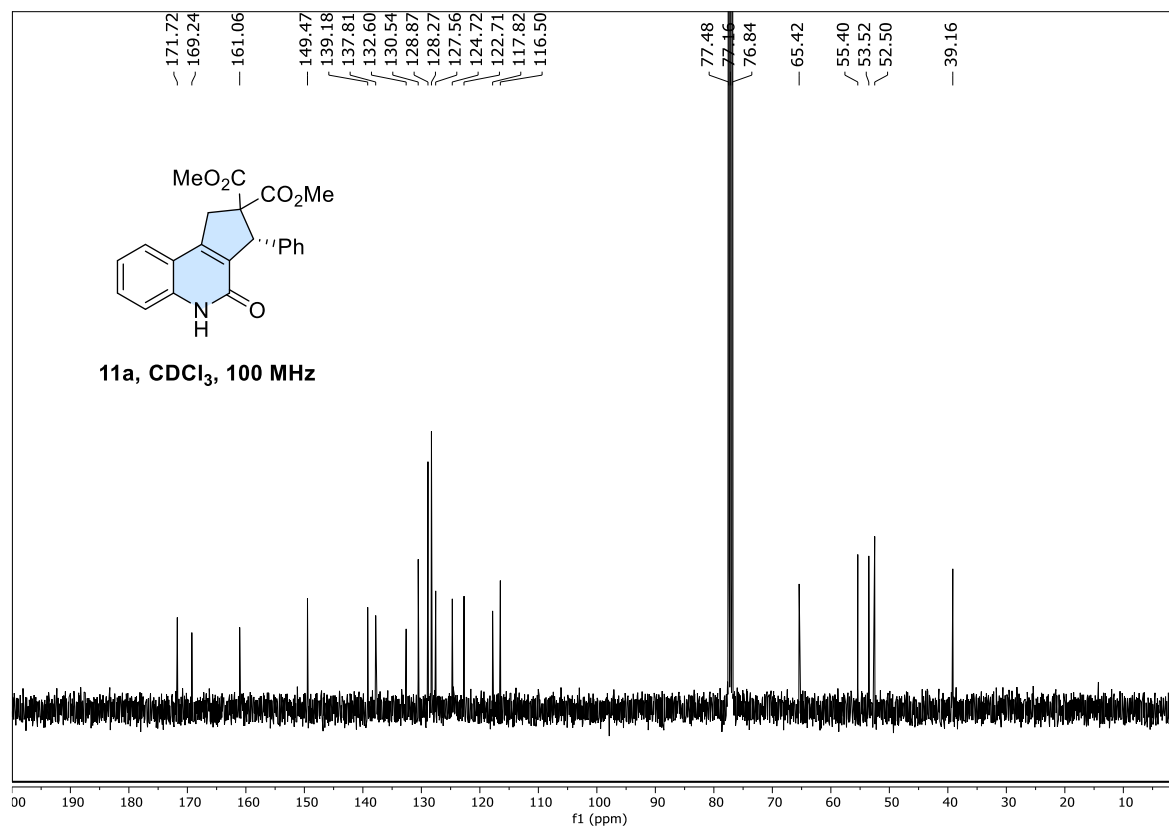

## 10. HPLC Data of Cyclopentane-Fused Quinoline-2-one Derivatives

### Dimethyl (R)-4-oxo-3-phenyl-5-tosyl-1,3,4,5-tetrahydro-2H-cyclopenta[c]quinoline-2,2-dicarboxylate (3a)

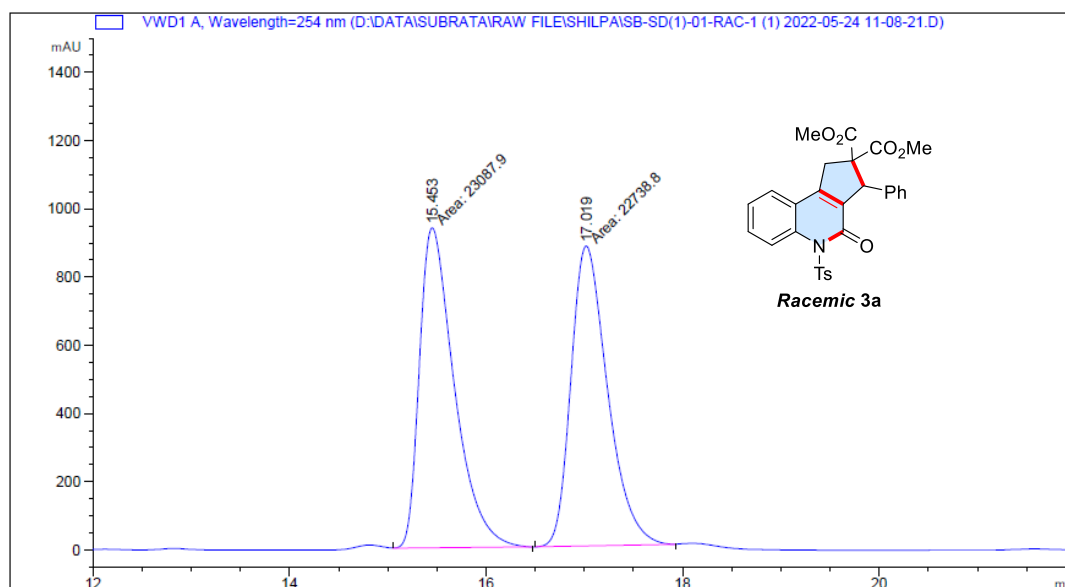

| Peak # | RetTime [min] | Type | Width [min] | Area [mAU*s] | Height [mAU] | Area %  |
|--------|---------------|------|-------------|--------------|--------------|---------|
| 1      | 15.453        | MM   | 0.4101      | 2.30879e4    | 938.27374    | 50.3810 |
| 2      | 17.019        | MM   | 0.4310      | 2.27388e4    | 879.29468    | 49.6190 |

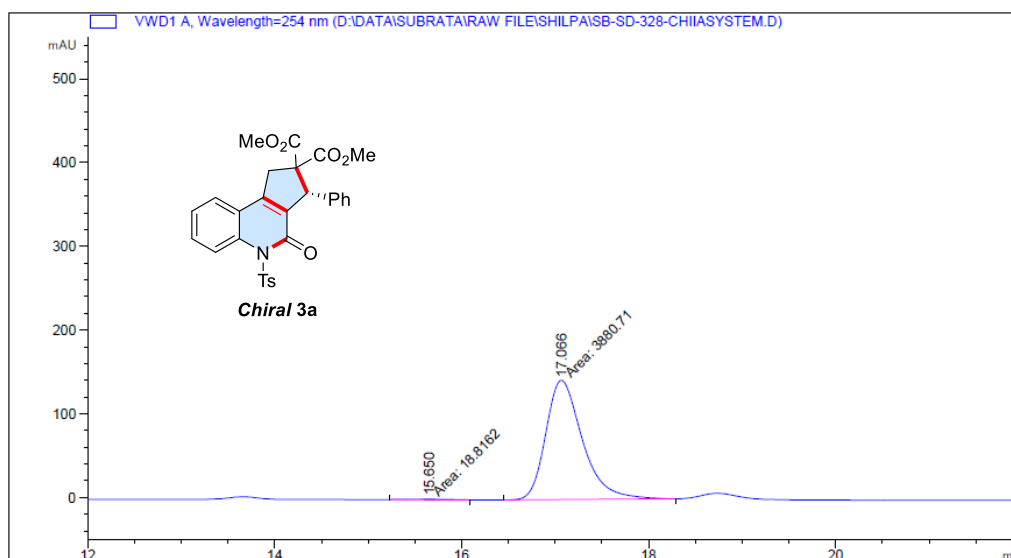

| Peak # | RetTime [min] | Type | Width [min] | Area [mAU*s] | Height [mAU] | Area %  |
|--------|---------------|------|-------------|--------------|--------------|---------|
| 1      | 15.650        | MM   | 0.4338      | 18.81618     | 7.22915e-1   | 0.4825  |
| 2      | 17.066        | MM   | 0.4546      | 3880.70508   | 142.28844    | 99.5175 |

Sample Info : CHIRALPAK IA, 30% IPA-HEXANE, 0.7 mL/min, 254 nm

**Dimethyl (*R*)-3-(4-methoxyphenyl)-4-oxo-5-tosyl-1,3,4,5-tetrahydro-2*H*-cyclopenta[*c*]quinoline-2,2-dicarboxylate (**3b**)**

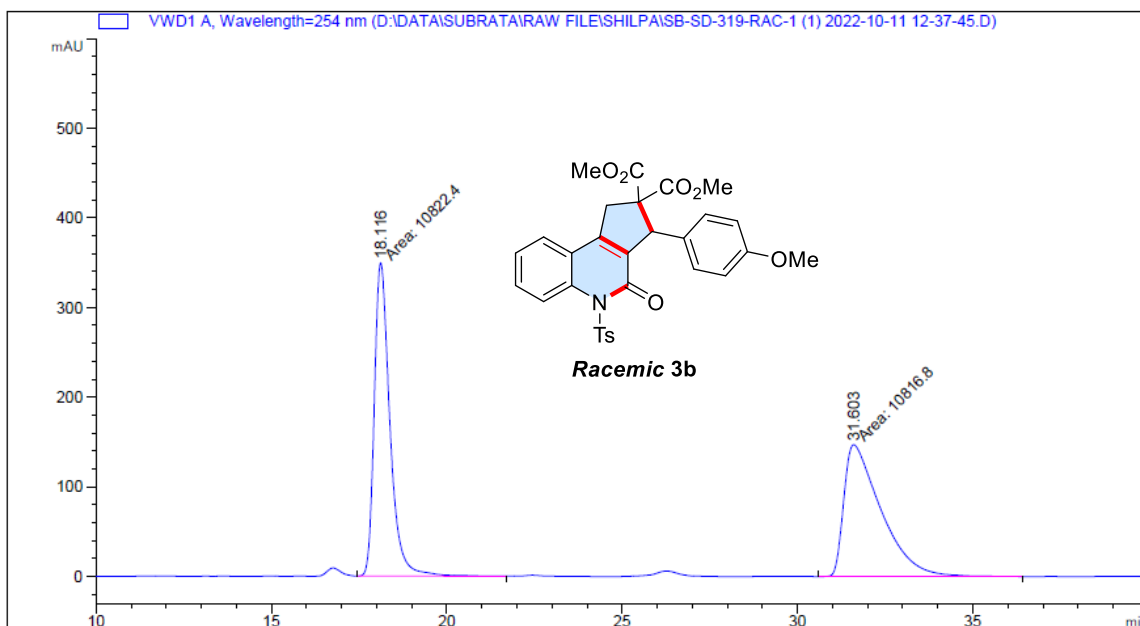

| Peak # | RetTime [min] | Type | Width [min] | Area [mAU*s] | Height [mAU] | Area %  |
|--------|---------------|------|-------------|--------------|--------------|---------|
| 1      | 18.116        | MM   | 0.5167      | 1.08224e4    | 349.08395    | 50.0128 |
| 2      | 31.603        | MM   | 1.2272      | 1.08168e4    | 146.90825    | 49.9872 |

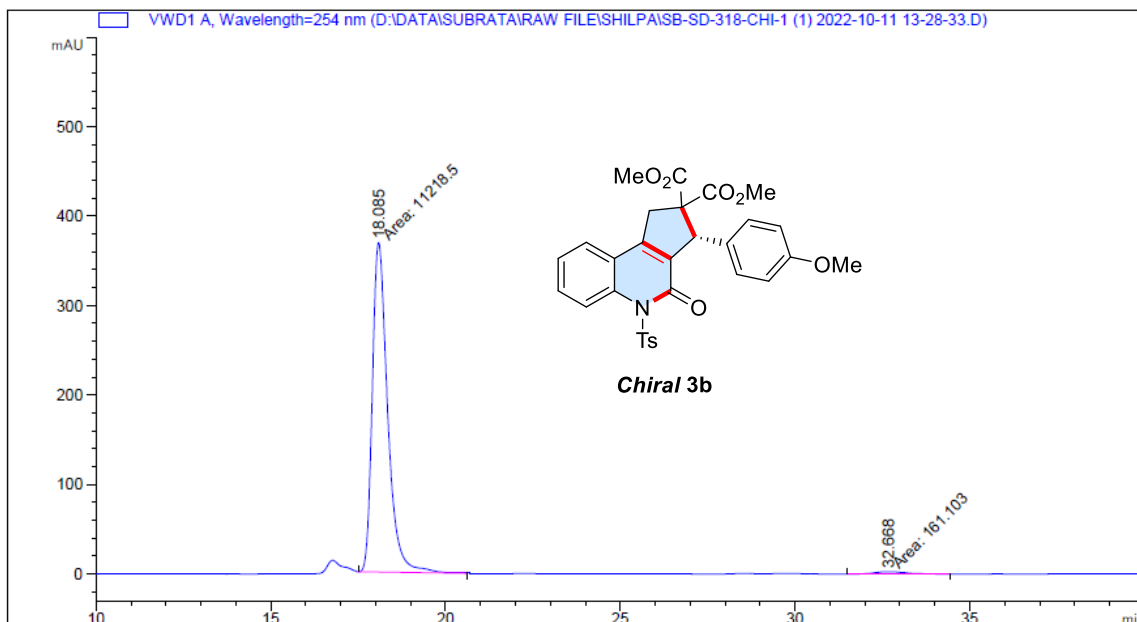

| Peak # | RetTime [min] | Type | Width [min] | Area [mAU*s] | Height [mAU] | Area %  |
|--------|---------------|------|-------------|--------------|--------------|---------|
| 1      | 18.085        | MM   | 0.5077      | 1.12185e4    | 368.27432    | 98.5843 |
| 2      | 32.668        | MM   | 1.0158      | 161.10349    | 2.64319      | 1.4157  |

Sample Info : CHIRALPAK IA, 30% IPA-HEXANE, 0.7 mL/min, 254 nm

**Dimethyl (*R*)-4-oxo-3-(*p*-tolyl)-5-tosyl-1,3,4,5-tetrahydro-2*H*-cyclopenta[*c*]quinoline-2,2-dicarboxylate (**3c**)**

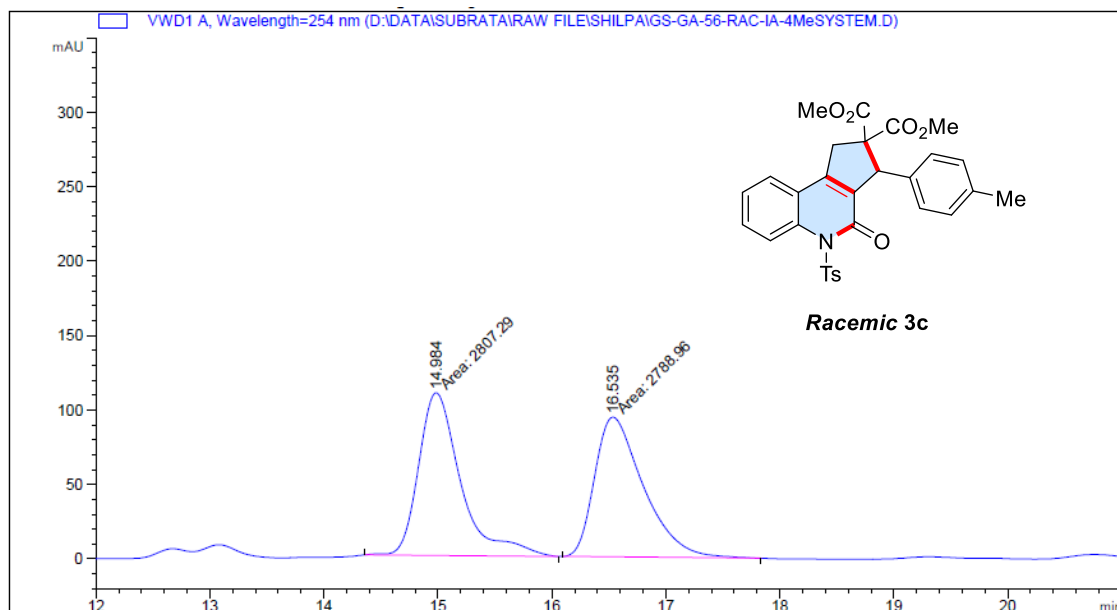

| Peak # | RetTime [min] | Type | Width [min] | Area [mAU*s] | Height [mAU] | Area %  |
|--------|---------------|------|-------------|--------------|--------------|---------|
| 1      | 14.984        | MM   | 0.4285      | 2807.28711   | 109.19985    | 50.1637 |
| 2      | 16.535        | MM   | 0.4956      | 2788.96265   | 93.78875     | 49.8363 |

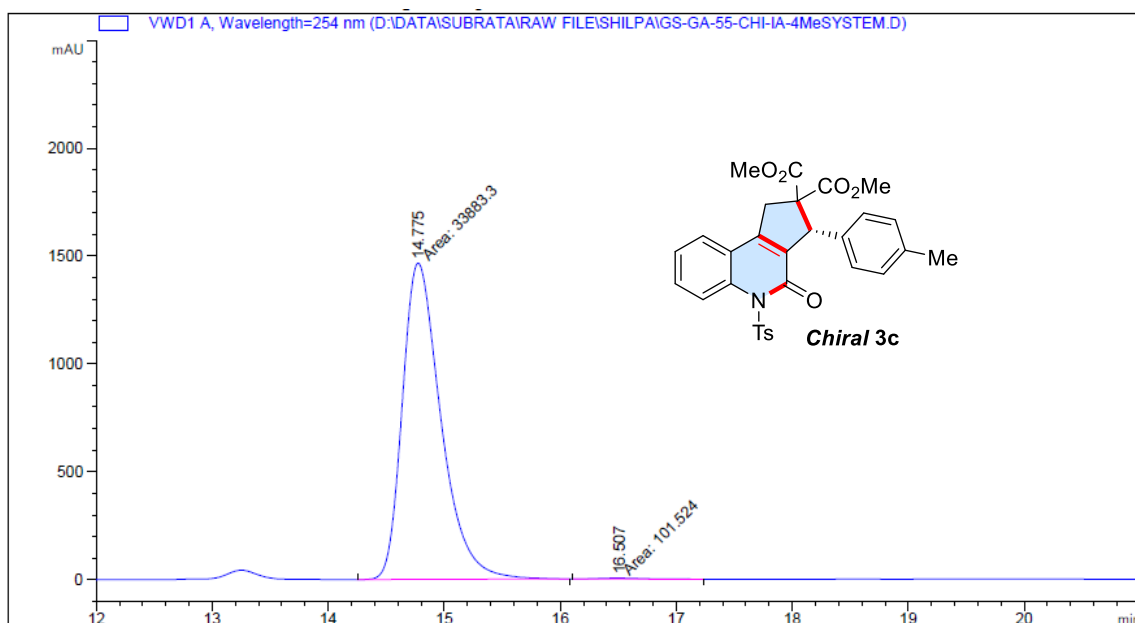

| Peak # | RetTime [min] | Type | Width [min] | Area [mAU*s] | Height [mAU] | Area %  |
|--------|---------------|------|-------------|--------------|--------------|---------|
| 1      | 14.775        | MM   | 0.3851      | 3.38833e4    | 1466.32703   | 99.7013 |
| 2      | 16.507        | MM   | 0.4628      | 101.52441    | 3.65592      | 0.2987  |

Sample Info : CHIRALPAK IA, 30% IPA-HEXANE, 0.7 mL/min, 254 nm

**Dimethyl (*R*)-3-(4-bromophenyl)-4-oxo-5-tosyl-1,3,4,5-tetrahydro-2*H*-cyclopenta[*c*]quinoline-2,2-dicarboxylate (3d)**

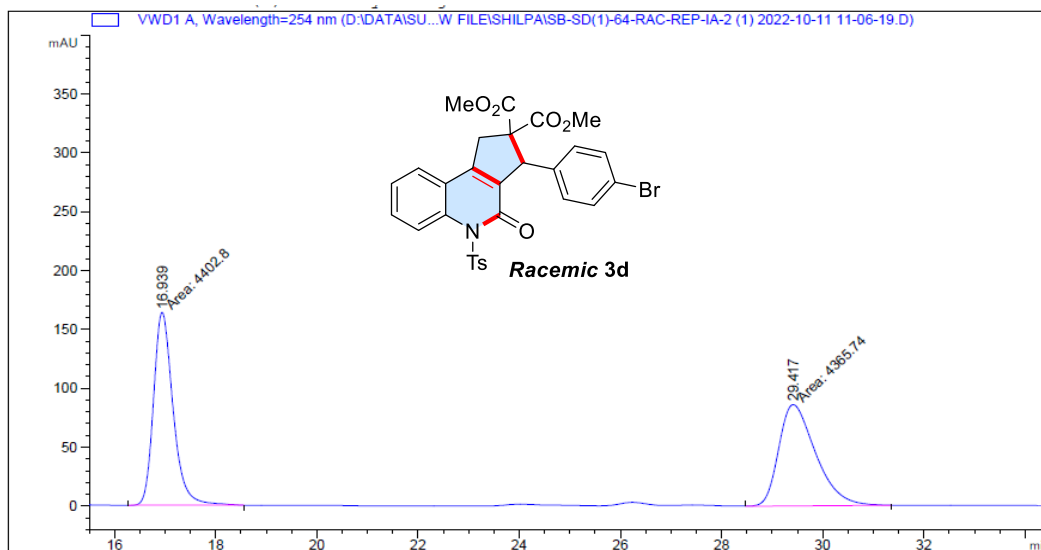

| Peak # | RetTime [min] | Type | Width [min] | Area [mAU*s] | Height [mAU] | Area %  |
|--------|---------------|------|-------------|--------------|--------------|---------|
| 1      | 16.939        | MM   | 0.4487      | 4412.60449   | 163.91437    | 50.2451 |
| 2      | 29.417        | MM   | 0.8469      | 4369.56055   | 85.98800     | 49.7549 |

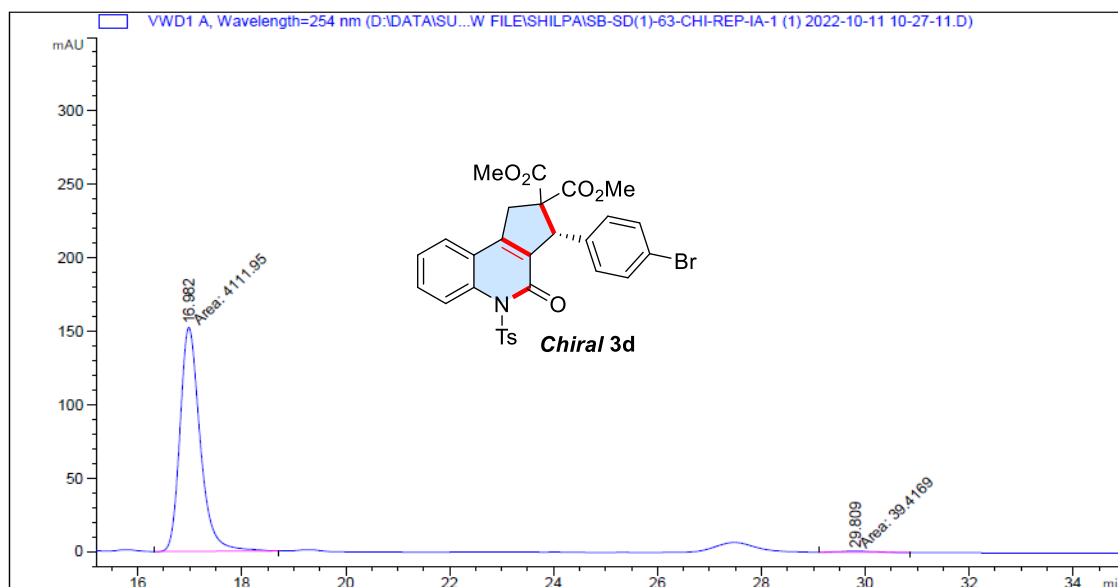

| Peak # | RetTime [min] | Type | Width [min] | Area [mAU*s] | Height [mAU] | Area %  |
|--------|---------------|------|-------------|--------------|--------------|---------|
| 1      | 16.982        | MM   | 0.4496      | 4111.94531   | 152.41422    | 99.0505 |
| 2      | 29.809        | MM   | 0.7517      | 39.41693     | 8.73976e-1   | 0.9495  |

Sample Info : CHIRALPAK IA, 30% IPA-HEXANE, 0.7 mL/min, 254 nm

**Dimethyl (*R*)-3-(4-chlorophenyl)-4-oxo-5-tosyl-1,3,4,5-tetrahydro-2*H*-cyclopenta[*c*]quinoline-2,2-dicarboxylate (**3e**)**

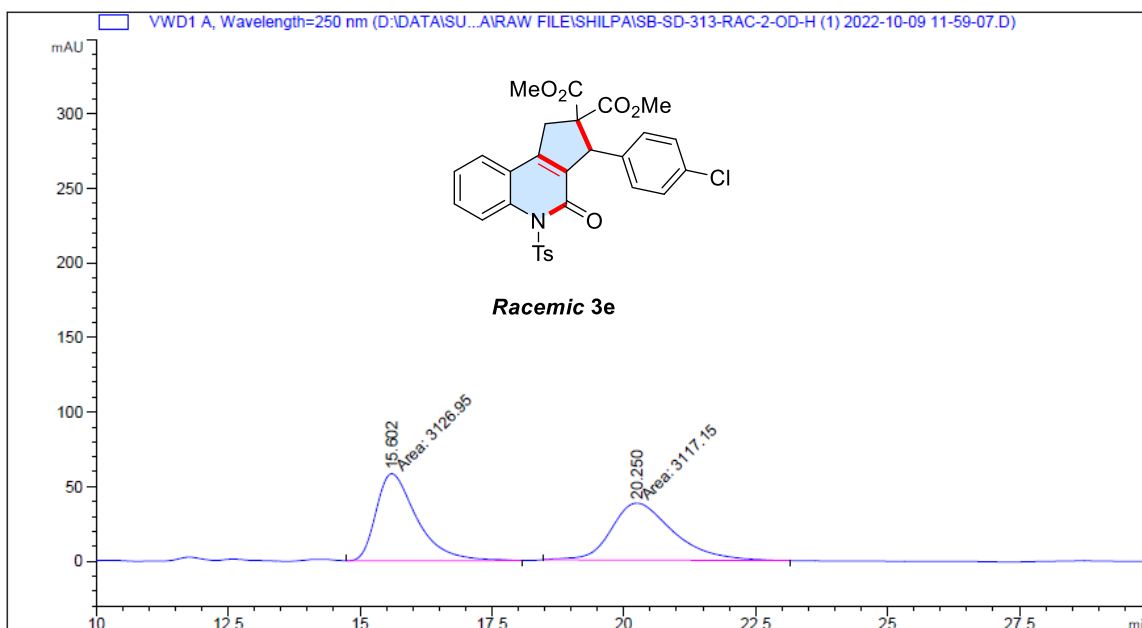

| Peak # | RetTime [min] | Type | Width [min] | Area [mAU*s] | Height [mAU] | Area %  |
|--------|---------------|------|-------------|--------------|--------------|---------|
| 1      | 15.602        | MM   | 0.8942      | 3126.94775   | 58.28323     | 50.0785 |
| 2      | 20.250        | MM   | 1.3600      | 3117.14771   | 38.19904     | 49.9215 |

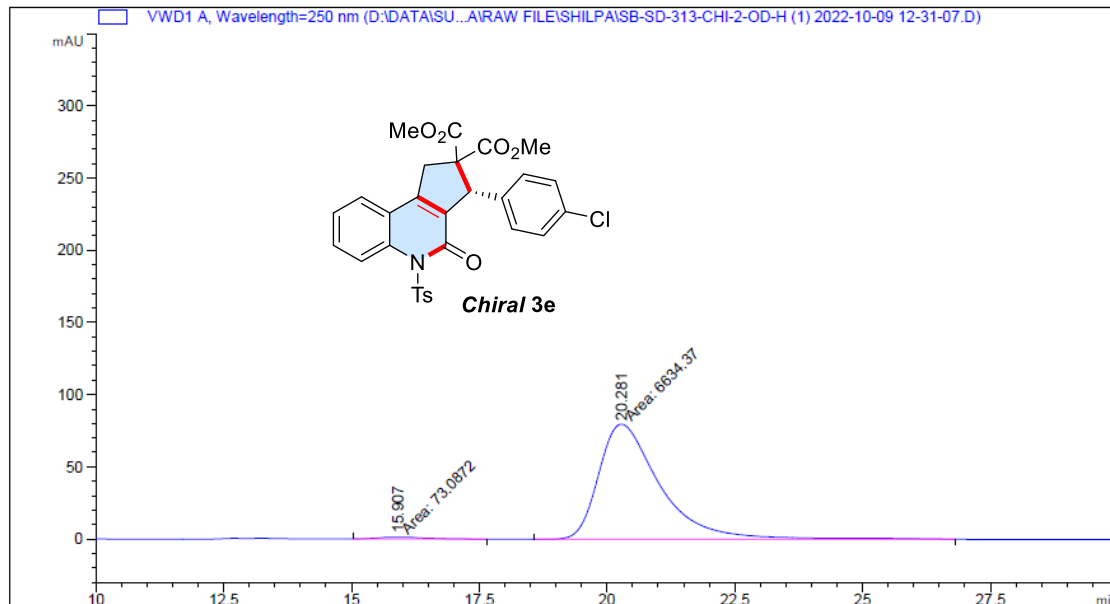

| Peak # | RetTime [min] | Type | Width [min] | Area [mAU*s] | Height [mAU] | Area %  |
|--------|---------------|------|-------------|--------------|--------------|---------|
| 1      | 15.907        | MM   | 0.9637      | 73.08722     | 1.26407      | 1.0896  |
| 2      | 20.281        | MM   | 1.3887      | 6634.37109   | 79.62185     | 98.9104 |

Sample Info : CHIRALCEL-OD-H, 30% IPA:HEXANE, 0.7 mL/min, 254 nm



**Dimethyl (*R*)-3-(4-fluorophenyl)-4-oxo-5-tosyl-1,3,4,5-tetrahydro-2*H*-cyclopenta[*c*]quinoline-2,2-dicarboxylate (3f)**

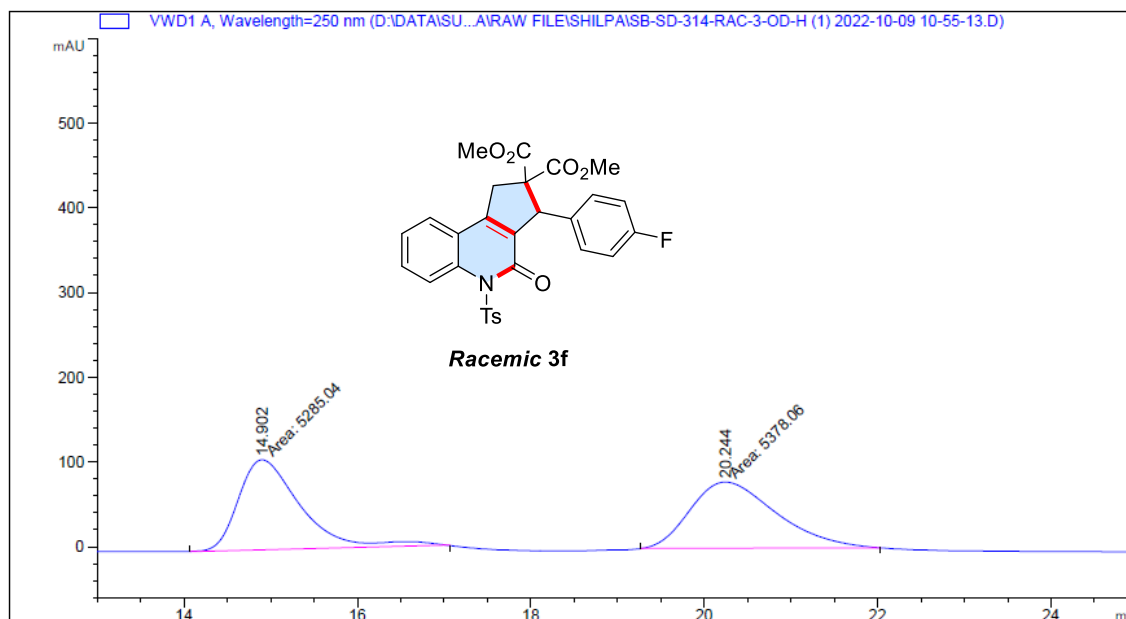

| Peak # | RetTime [min] | Type | Width [min] | Area [mAU*s] | Height [mAU] | Area %  |
|--------|---------------|------|-------------|--------------|--------------|---------|
| 1      | 14.902        | MM   | 0.8293      | 5285.04199   | 106.22025    | 49.5639 |
| 2      | 20.244        | MM   | 1.1490      | 5378.05518   | 78.01295     | 50.4361 |

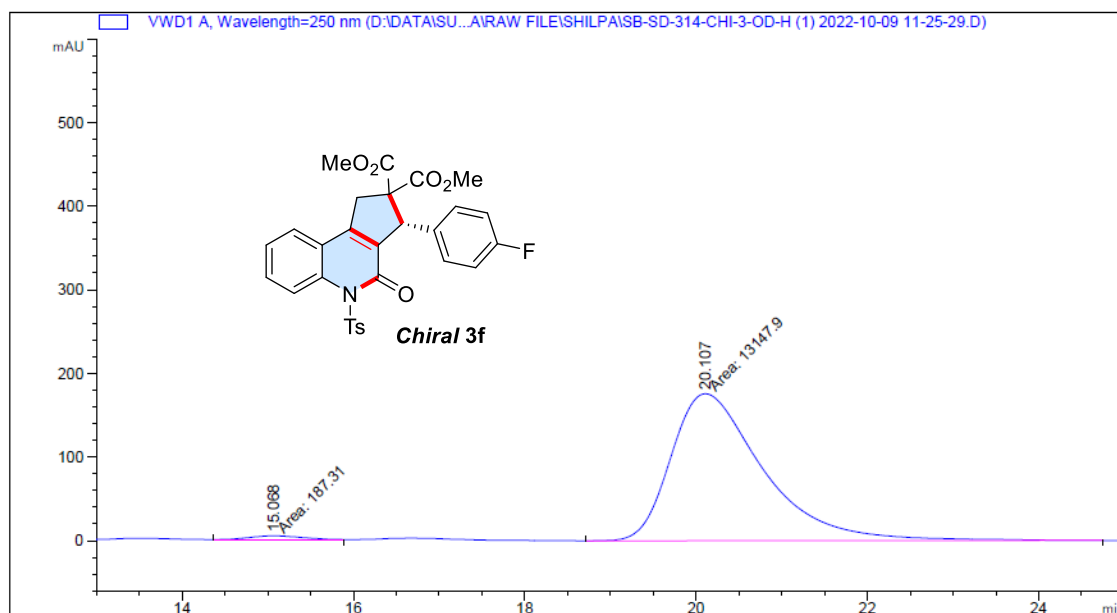

| Peak # | RetTime [min] | Type | Width [min] | Area [mAU*s] | Height [mAU] | Area %  |
|--------|---------------|------|-------------|--------------|--------------|---------|
| 1      | 15.068        | MM   | 0.7075      | 187.31029    | 4.41219      | 1.4046  |
| 2      | 20.107        | MM   | 1.2473      | 1.31479e4    | 175.68561    | 98.5954 |

Sample Info : CHIRALCEL-OD-H, 30% IPA:HEXANE, 0.7 mL/min, 254 nm

**Dimethyl (*R*)-4-oxo-5-tosyl-3-(4-(trifluoromethyl)phenyl)-1,3,4,5-tetrahydro-2*H*-cyclopenta[*c*]quinoline-2,2-dicarboxylate (**3g**)**

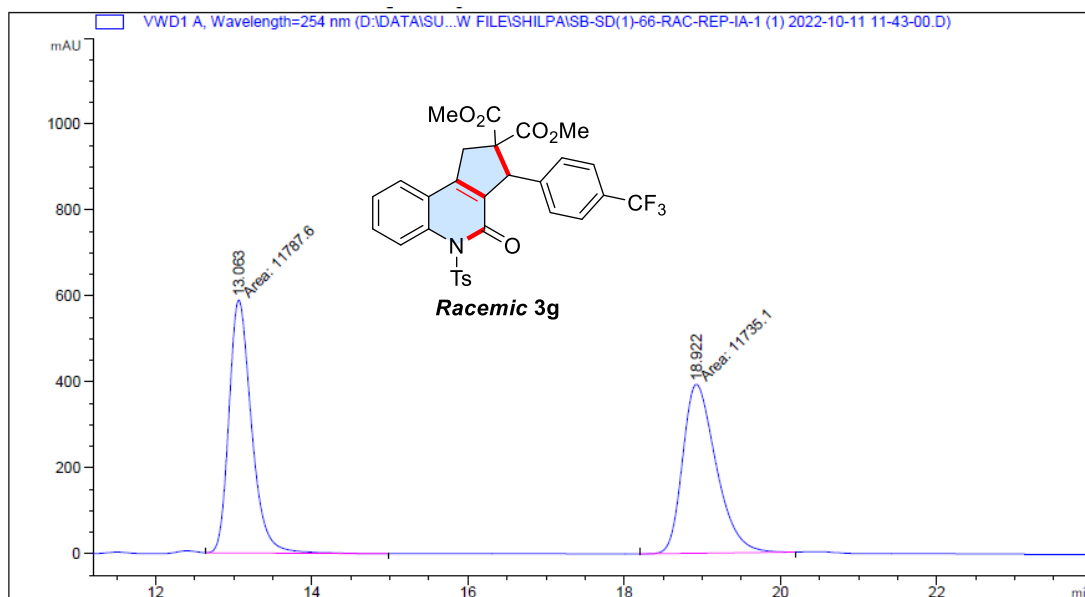

| Peak # | RetTime [min] | Type | Width [min] | Area [mAU*s] | Height [mAU] | Area %  |
|--------|---------------|------|-------------|--------------|--------------|---------|
| 1      | 13.063        | MM   | 0.3340      | 1.17876e4    | 588.11884    | 50.1115 |
| 2      | 18.922        | MM   | 0.4975      | 1.17351e4    | 393.10907    | 49.8885 |

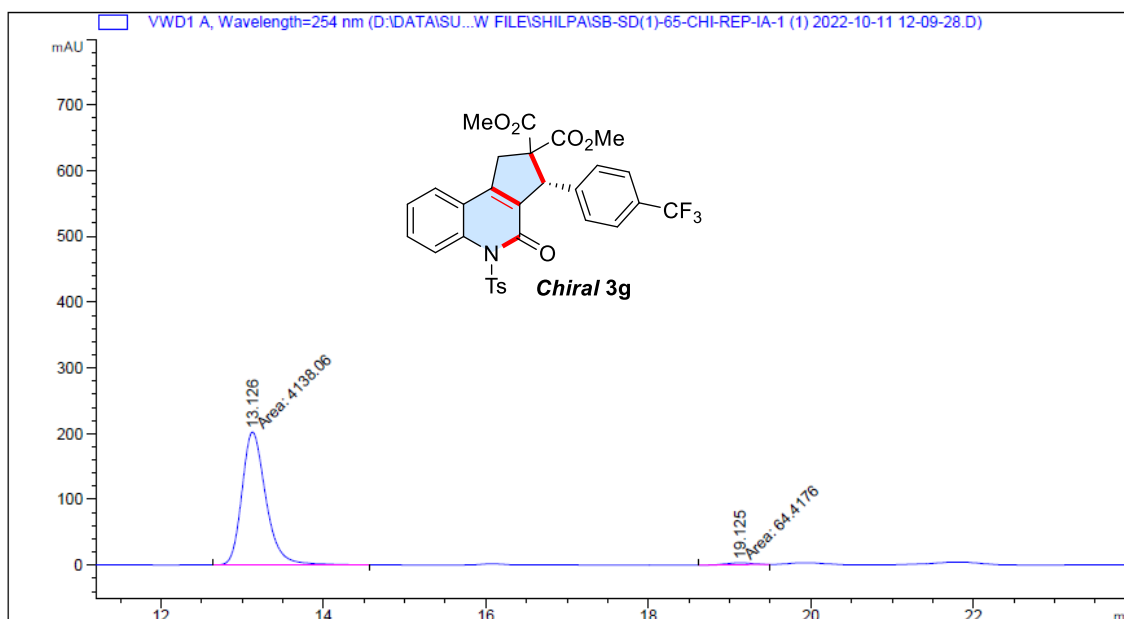

| Peak # | RetTime [min] | Type | Width [min] | Area [mAU*s] | Height [mAU] | Area %  |
|--------|---------------|------|-------------|--------------|--------------|---------|
| 1      | 13.126        | MM   | 0.3414      | 4138.06494   | 202.01782    | 98.4672 |
| 2      | 19.125        | MM   | 0.3935      | 64.41763     | 2.72828      | 1.5328  |

Sample Info : CHIRALPAK IA, 30% IPA-HEXANE, 0.7 mL/min, 254 nm

**Dimethyl (*R*)-3-(4-nitrophenyl)-4-oxo-5-tosyl-1,3,4,5-tetrahydro-2*H*-cyclopenta[*c*]quinoline-2,2-dicarboxylate (**3h**)**

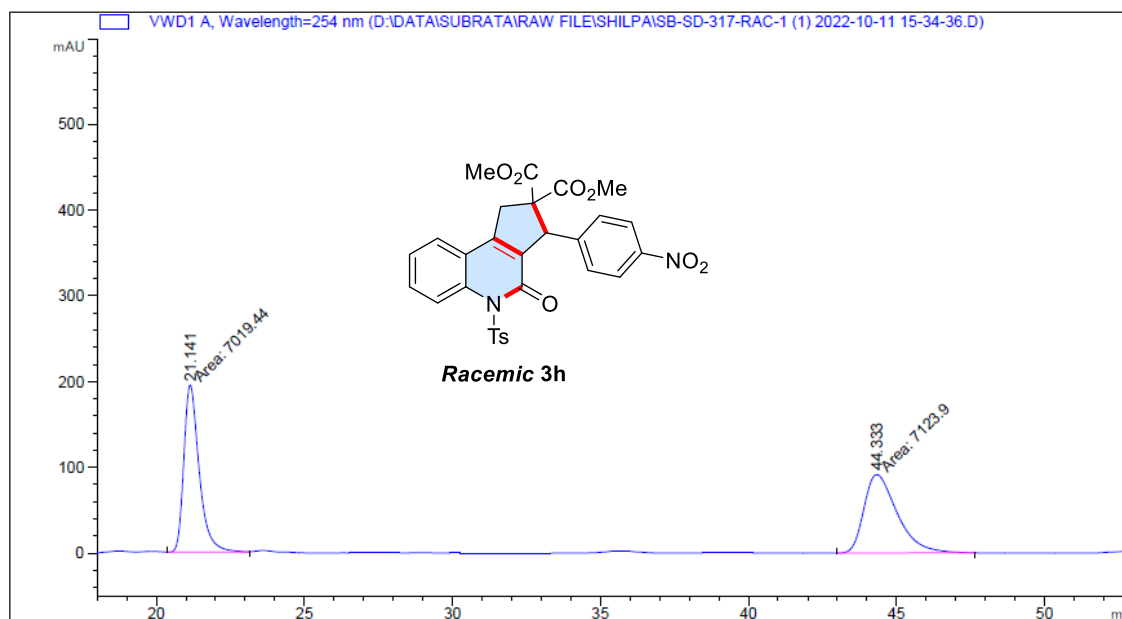

| Peak # | RetTime [min] | Type | Width [min] | Area [mAU*s] | Height [mAU] | Area %  |
|--------|---------------|------|-------------|--------------|--------------|---------|
| 1      | 21.141        | MM   | 0.6007      | 7019.44141   | 194.75829    | 49.6307 |
| 2      | 44.333        | MM   | 1.2990      | 7123.90283   | 91.40277     | 50.3693 |

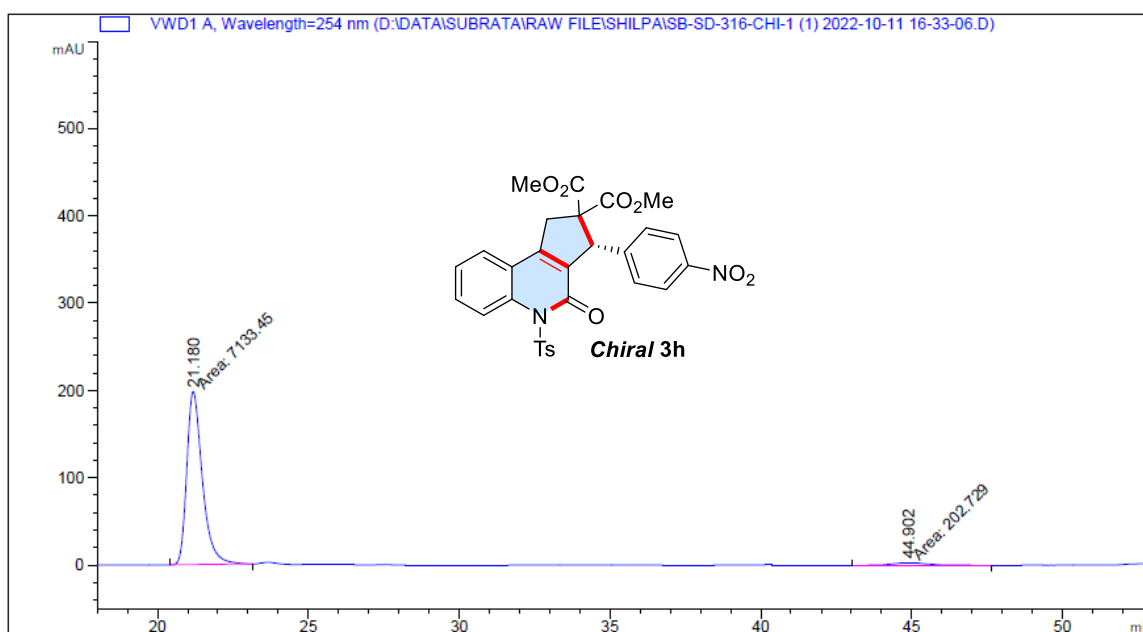

| Peak # | RetTime [min] | Type | Width [min] | Area [mAU*s] | Height [mAU] | Area %  |
|--------|---------------|------|-------------|--------------|--------------|---------|
| 1      | 21.180        | MM   | 0.5996      | 7133.44922   | 198.29237    | 97.2366 |
| 2      | 44.902        | MM   | 1.2606      | 202.72905    | 2.68039      | 2.7634  |

Sample Info : CHIRALPAK IA, 30% IPA-HEXANE, 0.7 mL/min, 254 nm

**Dimethyl (*R*)-4-oxo-3-(*m*-tolyl)-5-tosyl-1,3,4,5-tetrahydro-2*H*-cyclopenta[*c*]quinoline-2,2-dicarboxylate (**3i**)**

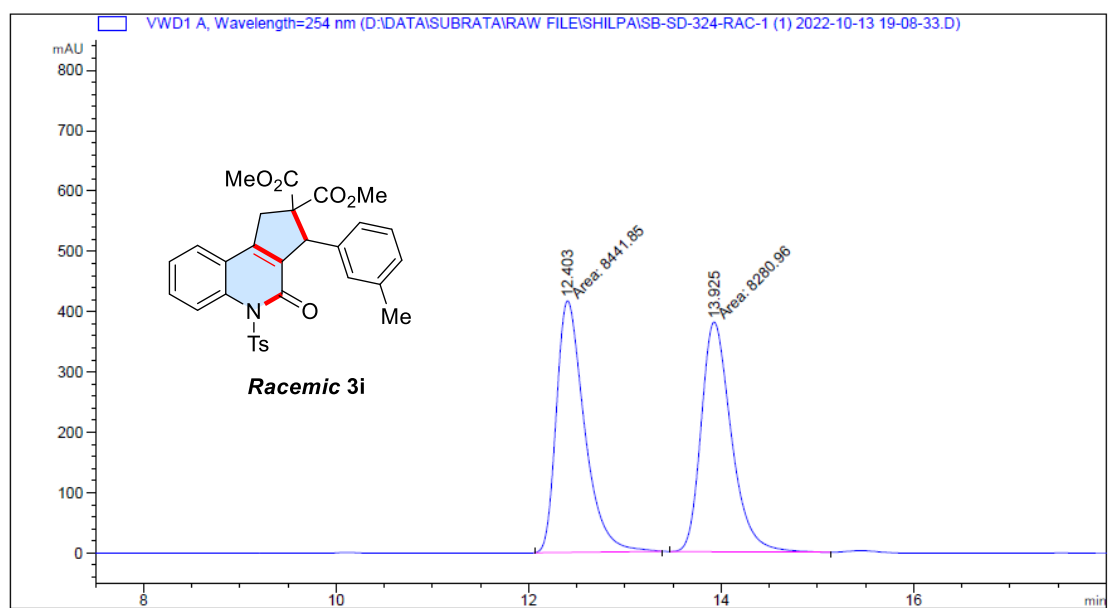

| Peak # | RetTime [min] | Type | Width [min] | Area [mAU*s] | Height [mAU] | Area %  |
|--------|---------------|------|-------------|--------------|--------------|---------|
| 1      | 12.403        | MM   | 0.3376      | 8441.84570   | 416.76416    | 50.4810 |
| 2      | 13.925        | MM   | 0.3625      | 8280.96387   | 380.75479    | 49.5190 |

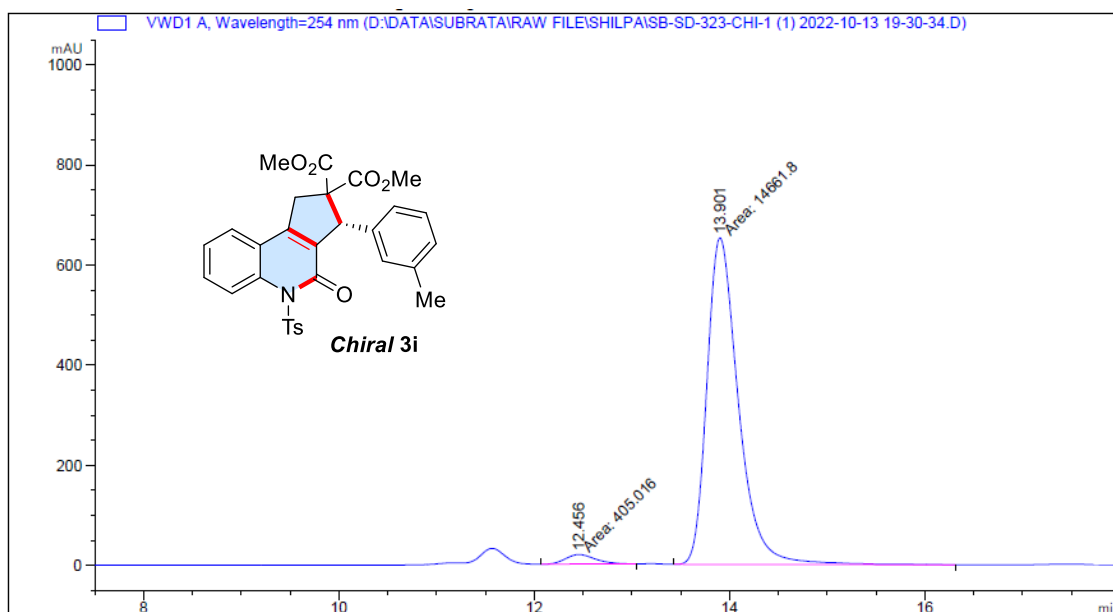

| Peak # | RetTime [min] | Type | Width [min] | Area [mAU*s] | Height [mAU] | Area %  |
|--------|---------------|------|-------------|--------------|--------------|---------|
| 1      | 12.456        | MM   | 0.3547      | 405.01599    | 19.03202     | 2.6881  |
| 2      | 13.901        | MM   | 0.3745      | 1.46618e4    | 652.42090    | 97.3119 |

Sample Info : CHIRALPAK IA, 30% IPA-HEXANE, 0.7 mL/min, 254 nm

**Dimethyl (*R*)-3-(3-methoxyphenyl)-4-oxo-5-tosyl-1,3,4,5-tetrahydro-2*H*-cyclopen-  
ta[*c*]quinoline-2,2-dicarboxylate (**3j**)**

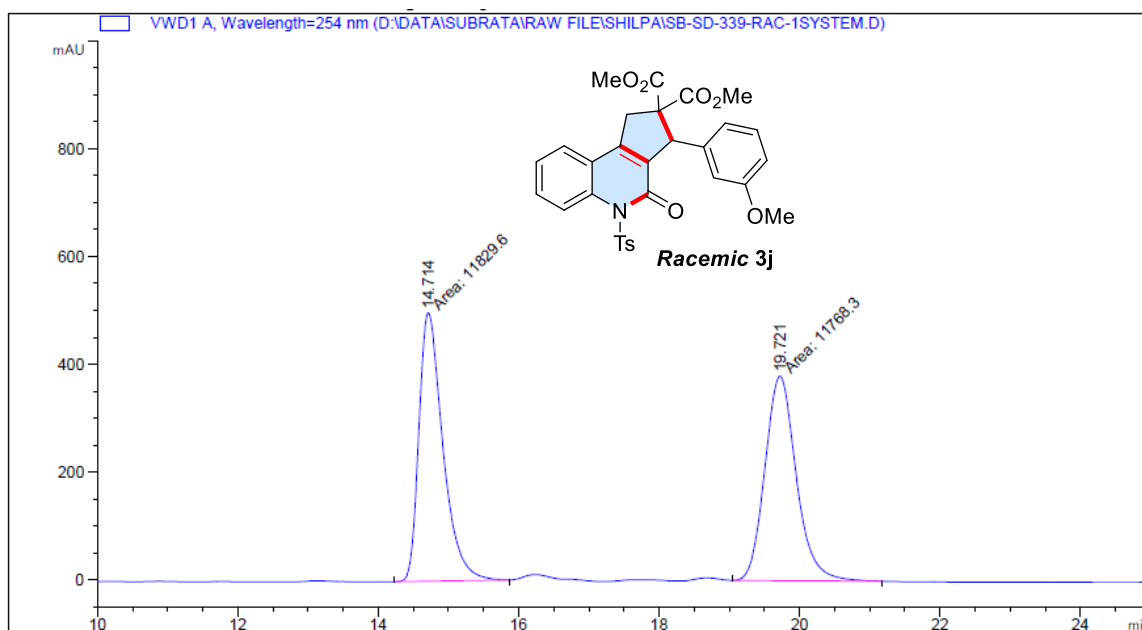

| Peak # | RetTime [min] | Type | Width [min] | Area [mAU*s] | Height [mAU] | Area %  |
|--------|---------------|------|-------------|--------------|--------------|---------|
| 1      | 14.714        | MM   | 0.3961      | 1.18296e4    | 497.71097    | 50.1297 |
| 2      | 19.721        | MM   | 0.5172      | 1.17683e4    | 379.25208    | 49.8703 |

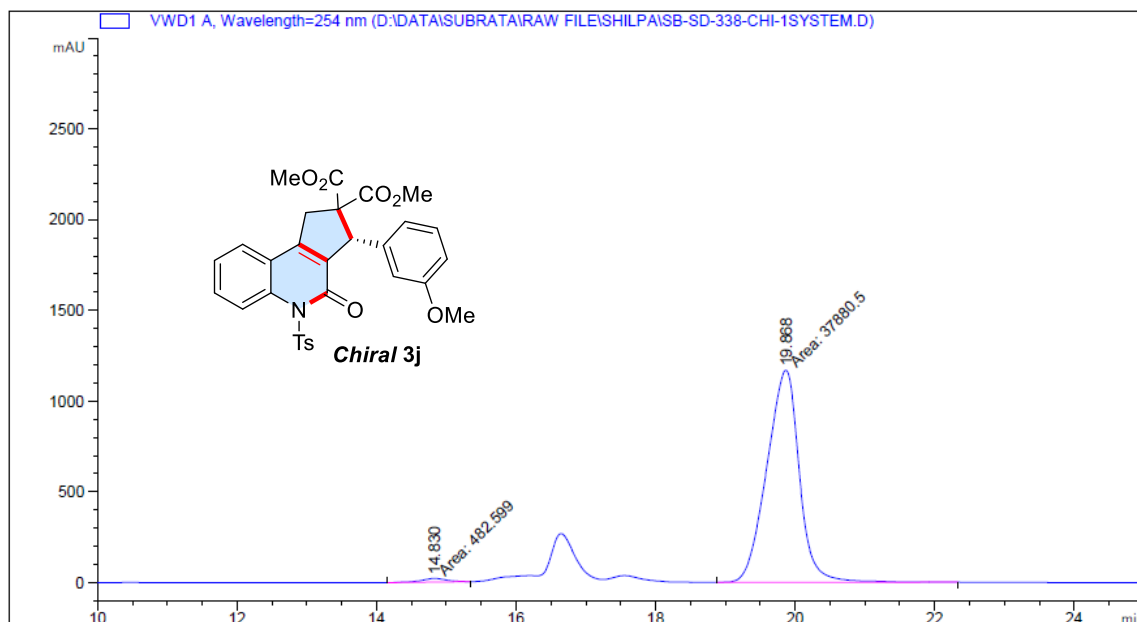

| Peak # | RetTime [min] | Type | Width [min] | Area [mAU*s] | Height [mAU] | Area %  |
|--------|---------------|------|-------------|--------------|--------------|---------|
| 1      | 14.830        | MM   | 0.4088      | 482.59869    | 19.67612     | 1.2580  |
| 2      | 19.868        | MM   | 0.5400      | 3.78805e4    | 1169.20581   | 98.7420 |

Sample Info : CHIRALPAK IA, 30% IPA-HEXANE, 0.7 mL/min, 254 nm

**Dimethyl (R)-3-(3-bromophenyl)-4-oxo-5-tosyl-1,3,4,5-tetrahydro-2H-cyclopenta[c]quinoline-2,2-dicarboxylate (3k)**

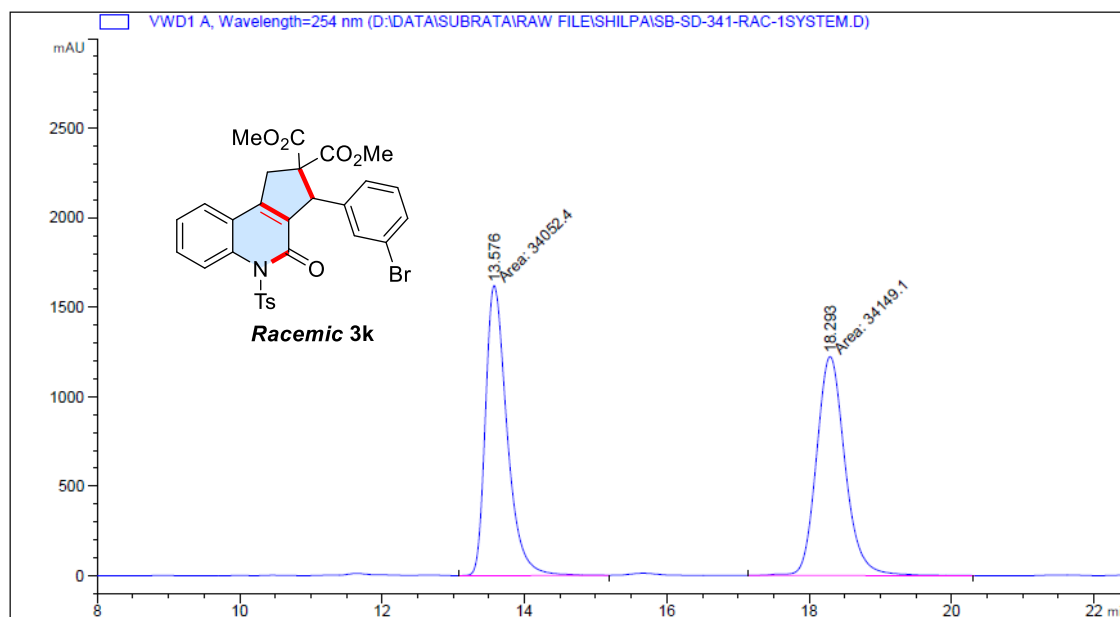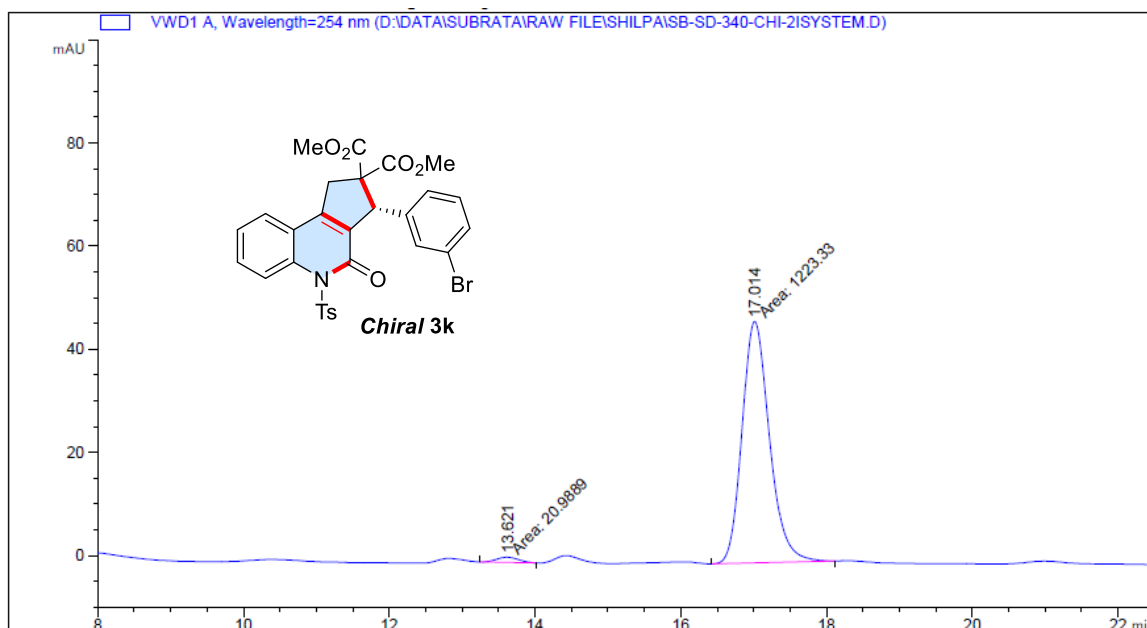

Sample Info : CHIRALPAK IA, 30% IPA-HEXANE, 0.7 mL/min, 254 nm

**Dimethyl (*R*)-3-(3-chlorophenyl)-4-oxo-5-tosyl-1,3,4,5-tetrahydro-2*H*-cyclopenta[*c*]quinoline-2,2-dicarboxylate (3I)**

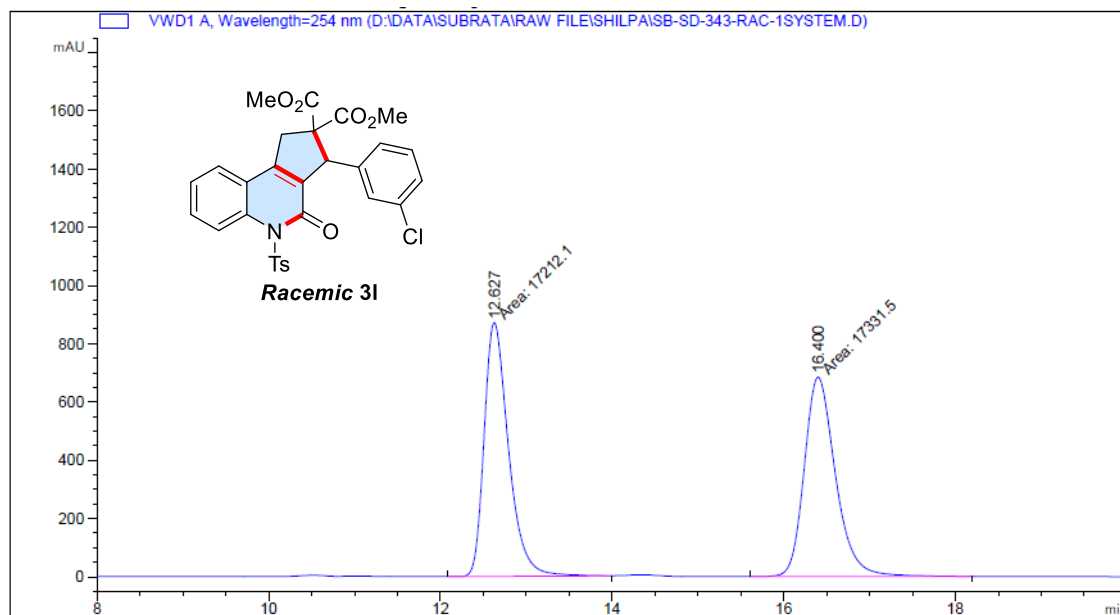

| Peak # | RetTime [min] | Type | Width [min] | Area [mAU*s] | Height [mAU] | Area %  |
|--------|---------------|------|-------------|--------------|--------------|---------|
| 1      | 12.627        | MM   | 0.3291      | 1.72121e4    | 871.72314    | 49.8272 |
| 2      | 16.400        | MM   | 0.4221      | 1.73315e4    | 684.39404    | 50.1728 |

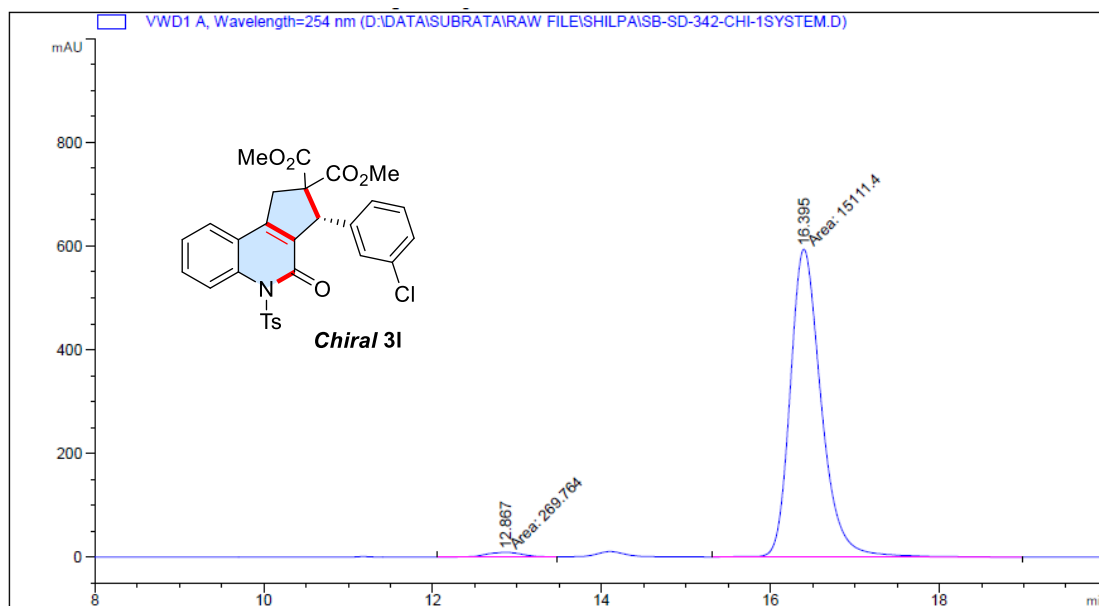

| Peak # | RetTime [min] | Type | Width [min] | Area [mAU*s] | Height [mAU] | Area %  |
|--------|---------------|------|-------------|--------------|--------------|---------|
| 1      | 12.867        | MM   | 0.4980      | 269.76379    | 9.02857      | 1.7539  |
| 2      | 16.395        | MM   | 0.4246      | 1.51114e4    | 593.21155    | 98.2461 |

Sample Info : CHIRALPAK IA, 30% IPA-HEXANE, 0.7 mL/min, 254 nm

**Dimethyl (*R*)-3-(2-bromophenyl)-4-oxo-5-tosyl-1,3,4,5-tetrahydro-2*H*-cyclopenta[*c*]quinoline-2,2-dicarboxylate (3m)**

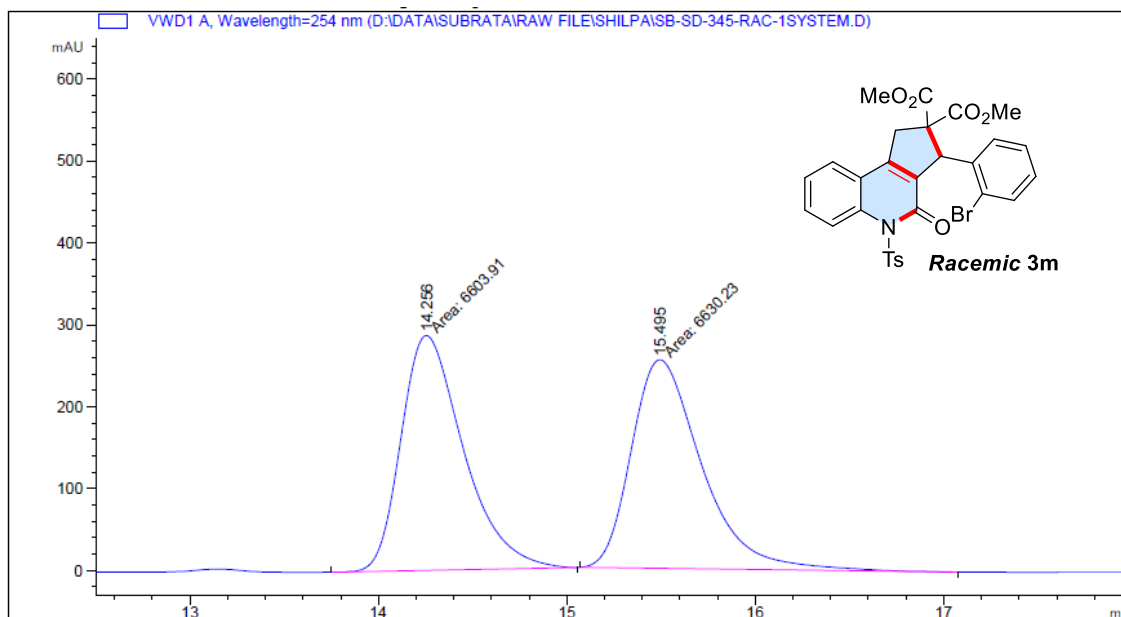

| Peak # | RetTime [min] | Type | Width [min] | Area [mAU*s] | Height [mAU] | Area %  |
|--------|---------------|------|-------------|--------------|--------------|---------|
| 1      | 14.256        | MM   | 0.3838      | 6603.91064   | 286.75345    | 49.9006 |
| 2      | 15.495        | MM   | 0.4338      | 6630.22900   | 254.70618    | 50.0994 |

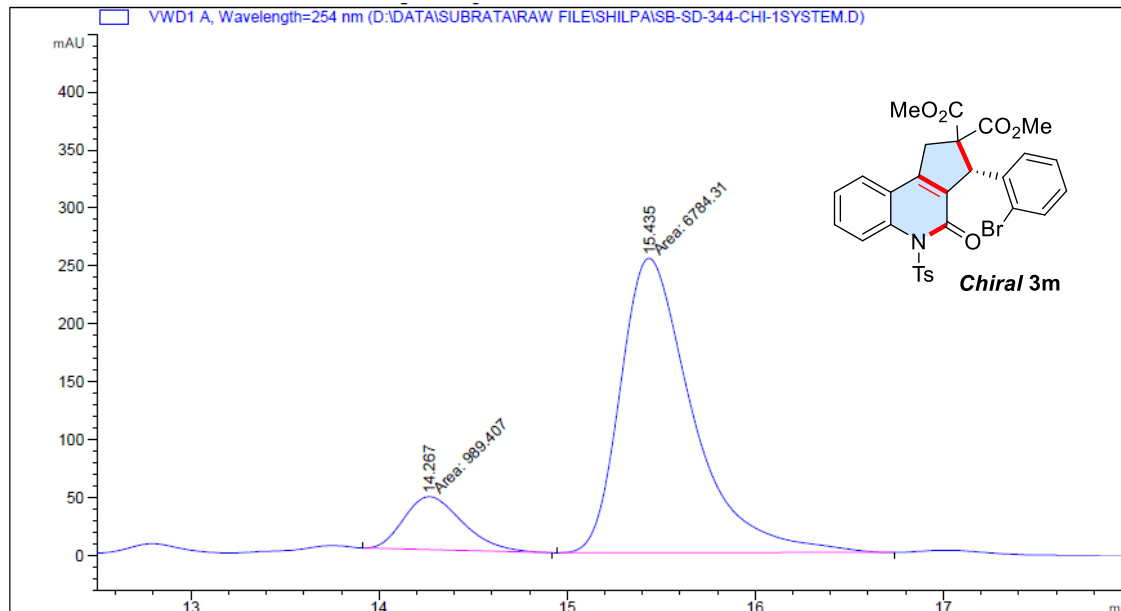

| Peak # | RetTime [min] | Type | Width [min] | Area [mAU*s] | Height [mAU] | Area %  |
|--------|---------------|------|-------------|--------------|--------------|---------|
| 1      | 14.267        | MM   | 0.3611      | 989.40686    | 45.66132     | 12.7276 |
| 2      | 15.435        | MM   | 0.4450      | 6784.30811   | 254.08867    | 87.2724 |

Sample Info : CHIRALPAK IA, 30% IPA-HEXANE, 0.7 mL/min, 254 nm



**Dimethyl (*R*)-3-(2-chlorophenyl)-4-oxo-5-tosyl-1,3,4,5-tetrahydro-2*H*-cyclopenta[*c*]quinoline-2,2-dicarboxylate (**3n**)**

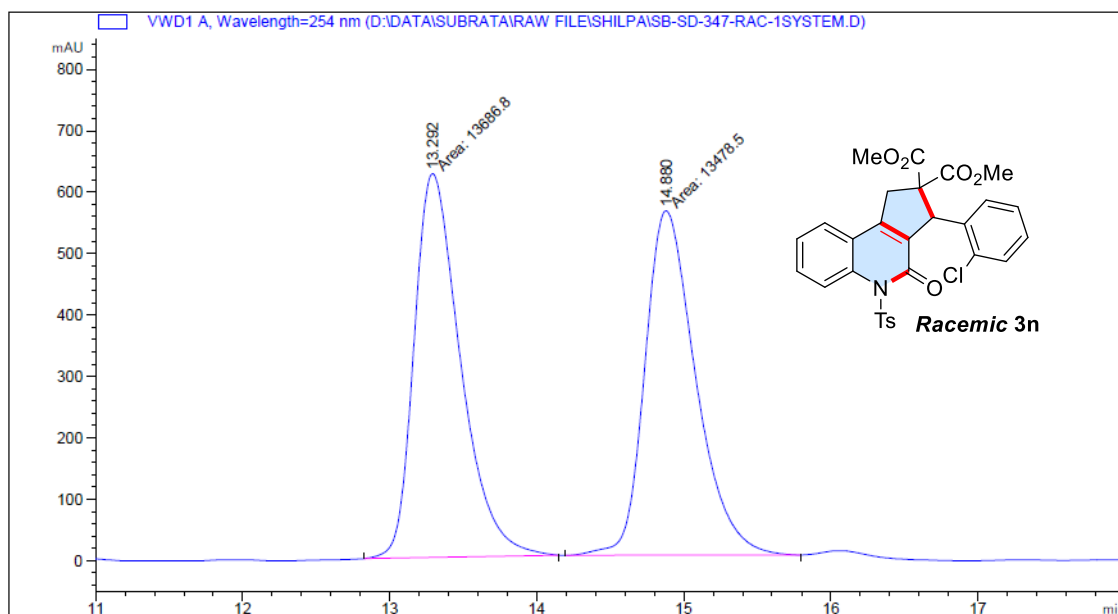

| Peak # | RetTime [min] | Type | Width [min] | Area [mAU*s] | Height [mAU] | Area %  |
|--------|---------------|------|-------------|--------------|--------------|---------|
| 1      | 13.292        | MM   | 0.3651      | 1.36868e4    | 624.87201    | 50.3834 |
| 2      | 14.880        | MM   | 0.4005      | 1.34785e4    | 560.92548    | 49.6166 |

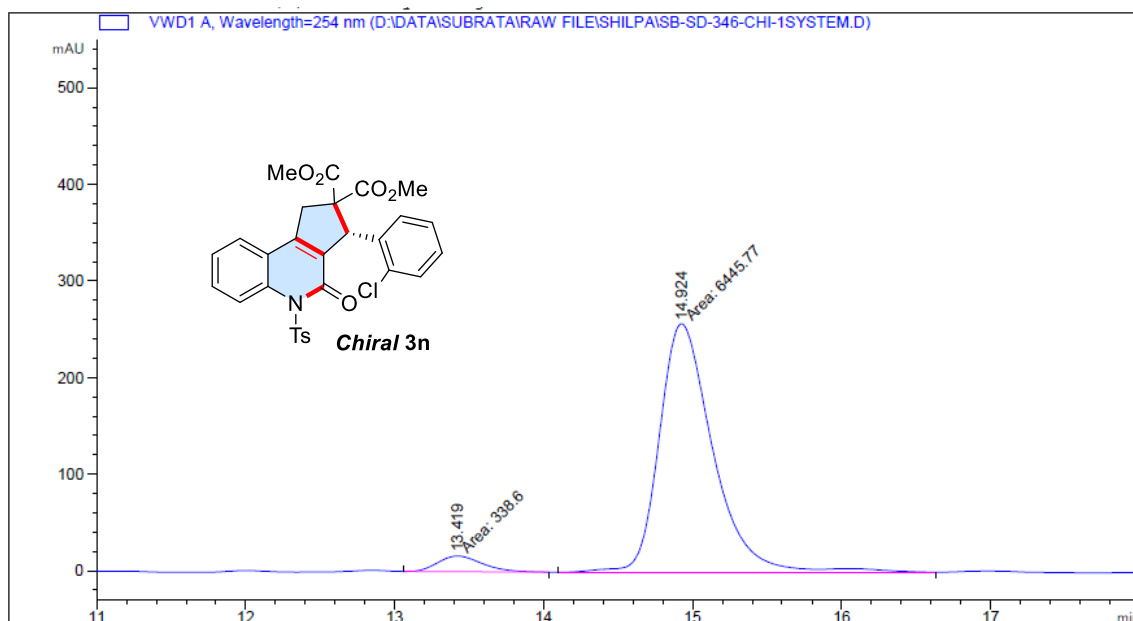

| Peak # | RetTime [min] | Type | Width [min] | Area [mAU*s] | Height [mAU] | Area %  |
|--------|---------------|------|-------------|--------------|--------------|---------|
| 1      | 13.419        | MM   | 0.3469      | 338.60004    | 16.26587     | 4.9909  |
| 2      | 14.924        | MM   | 0.4177      | 6445.77344   | 257.18408    | 95.0091 |

Sample Info : CHIRALPAK IA, 30% IPA-HEXANE, 0.7 mL/min, 254 nm

**Dimethyl (*R*)-3-(2-fluorophenyl)-4-oxo-5-tosyl-1,3,4,5-tetrahydro-2*H*-cyclopenta[*c*]quinoline-2,2-dicarboxylate (**3o**)**

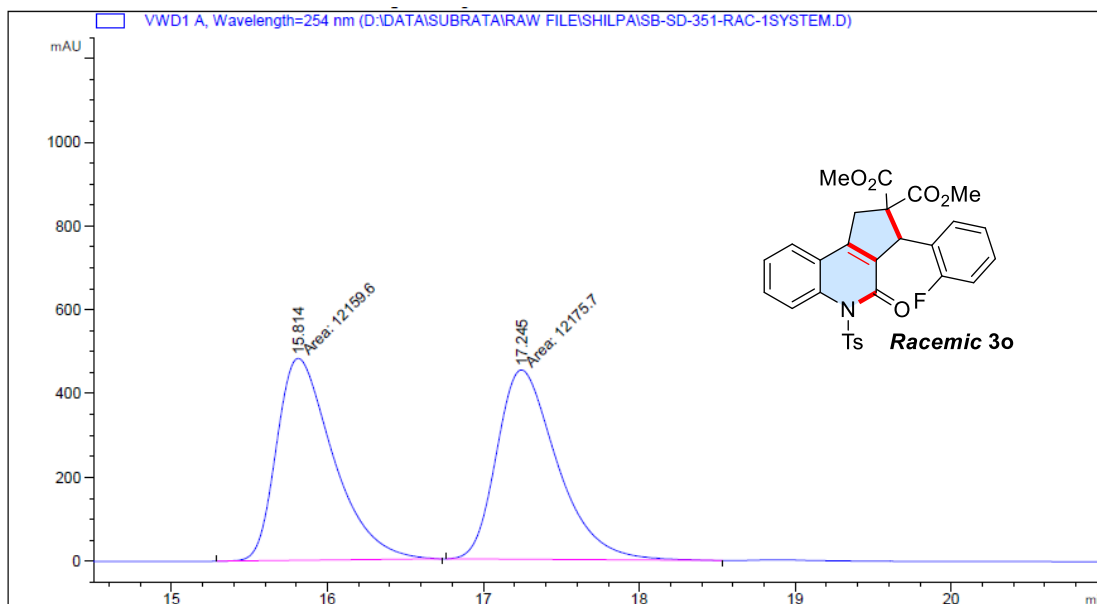

| Peak # | RetTime [min] | Type | Width [min] | Area [mAU*s] | Height [mAU] | Area %  |
|--------|---------------|------|-------------|--------------|--------------|---------|
| 1      | 15.814        | MM   | 0.4205      | 1.21596e4    | 481.93762    | 49.9669 |
| 2      | 17.245        | MM   | 0.4492      | 1.21757e4    | 451.71497    | 50.0331 |

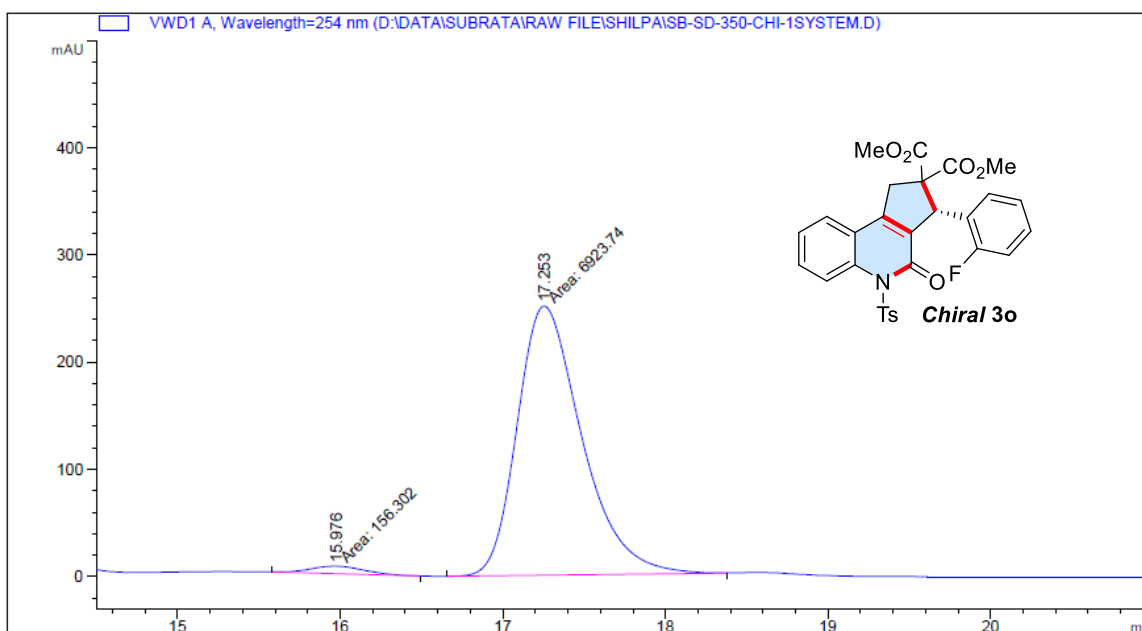

| Peak # | RetTime [min] | Type | Width [min] | Area [mAU*s] | Height [mAU] | Area %  |
|--------|---------------|------|-------------|--------------|--------------|---------|
| 1      | 15.976        | MM   | 0.3717      | 156.30159    | 7.00905      | 2.2076  |
| 2      | 17.253        | MM   | 0.4600      | 6923.74170   | 250.84380    | 97.7924 |

Sample Info : CHIRALPAK IA, 30% IPA-HEXANE, 0.7 mL/min, 254 nm

**Dimethyl (R)-3-(3,4-dichlorophenyl)-4-oxo-5-tosyl-1,3,4,5-tetrahydro-2H-cyclopenta[c]quinoline-2,2-dicarboxylate (3p)**

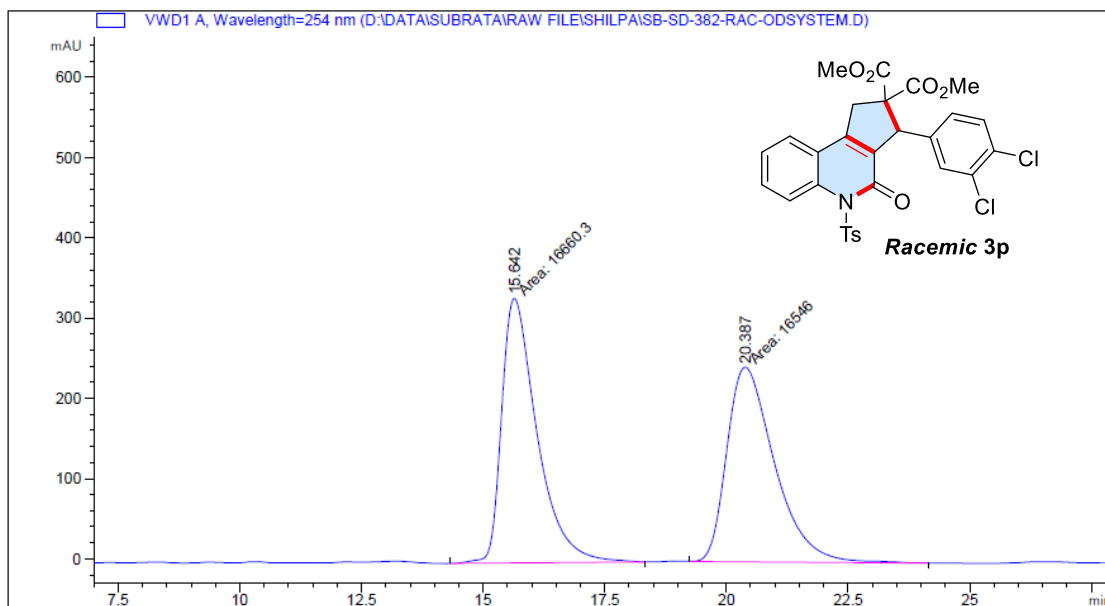

| Peak # | RetTime [min] | Type | Width [min] | Area [mAU*s] | Height [mAU] | Area %  |
|--------|---------------|------|-------------|--------------|--------------|---------|
| 1      | 15.642        | MM   | 0.8430      | 1.66603e4    | 329.39282    | 50.1722 |
| 2      | 20.387        | MM   | 1.1373      | 1.65460e4    | 242.48463    | 49.8278 |

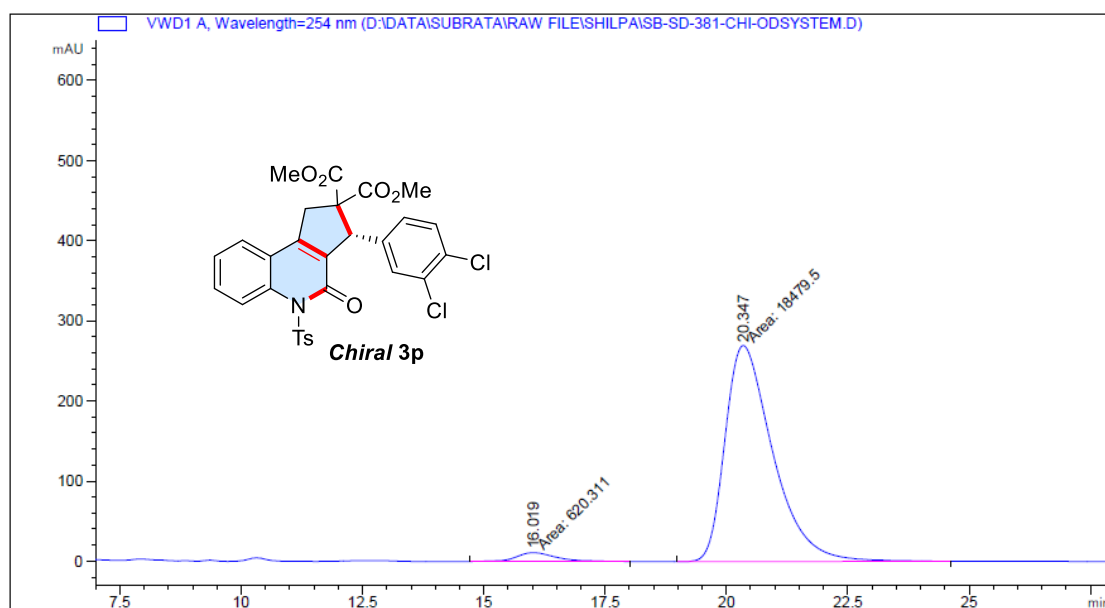

| Peak # | RetTime [min] | Type | Width [min] | Area [mAU*s] | Height [mAU] | Area %  |
|--------|---------------|------|-------------|--------------|--------------|---------|
| 1      | 16.019        | MM   | 0.9355      | 620.31110    | 11.05087     | 3.2477  |
| 2      | 20.347        | MM   | 1.1425      | 1.84795e4    | 269.56940    | 96.7523 |

Sample Info : CHIRALCEL OD-H 30% IPA:HEXANE, 0.7 mL/min, 254 nm

**Dimethyl (*R*)-3-(naphthalen-2-yl)-4-oxo-5-tosyl-1,3,4,5-tetrahydro-2*H*-cyclopenta[*c*]quinoline-2,2-dicarboxylate (**3q**)**

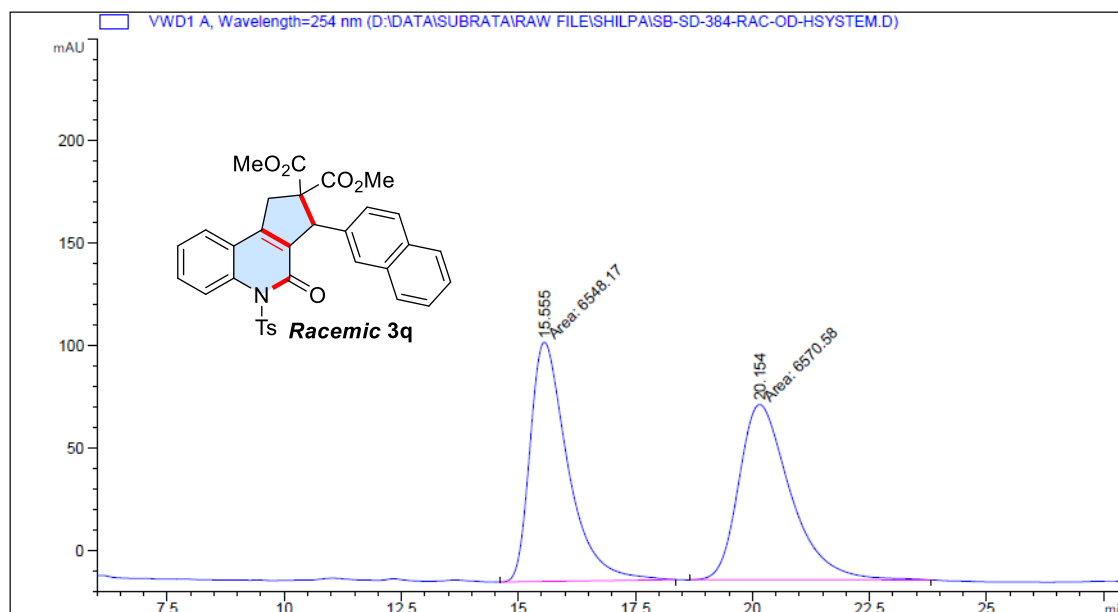

| Peak # | RetTime [min] | Type | Width [min] | Area [mAU*s] | Height [mAU] | Area %  |
|--------|---------------|------|-------------|--------------|--------------|---------|
| 1      | 15.555        | MM   | 0.9338      | 6548.16699   | 116.87029    | 49.9146 |
| 2      | 20.154        | MM   | 1.2790      | 6570.58252   | 85.61803     | 50.0854 |

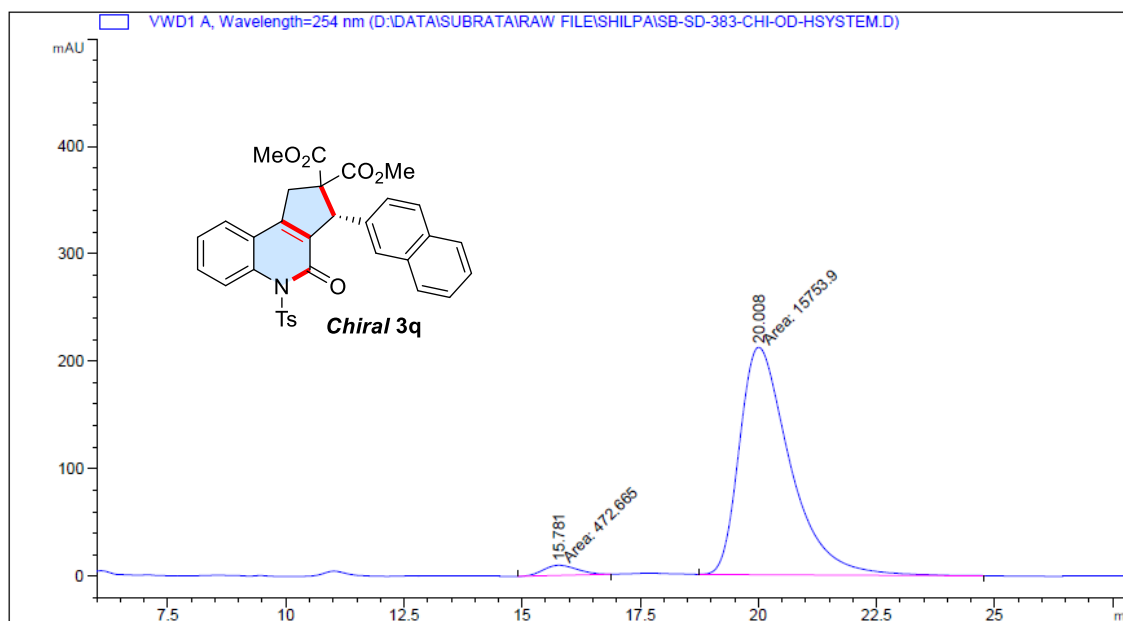

| Peak # | RetTime [min] | Type | Width [min] | Area [mAU*s] | Height [mAU] | Area %  |
|--------|---------------|------|-------------|--------------|--------------|---------|
| 1      | 15.781        | MM   | 0.8300      | 472.66464    | 9.49153      | 2.9129  |
| 2      | 20.008        | MM   | 1.2405      | 1.57539e4    | 211.65868    | 97.0871 |

Sample Info : CHIRALCEL OD-H, 30% IPA:HEXANE, 0.7 mL/min, 254 nm

**Dimethyl (*R*)-4-oxo-3-(thiophen-3-yl)-5-tosyl-1,3,4,5-tetrahydro-2*H*-cyclopenta[*c*]quinoline-2,2-dicarboxylate (**3r**)**

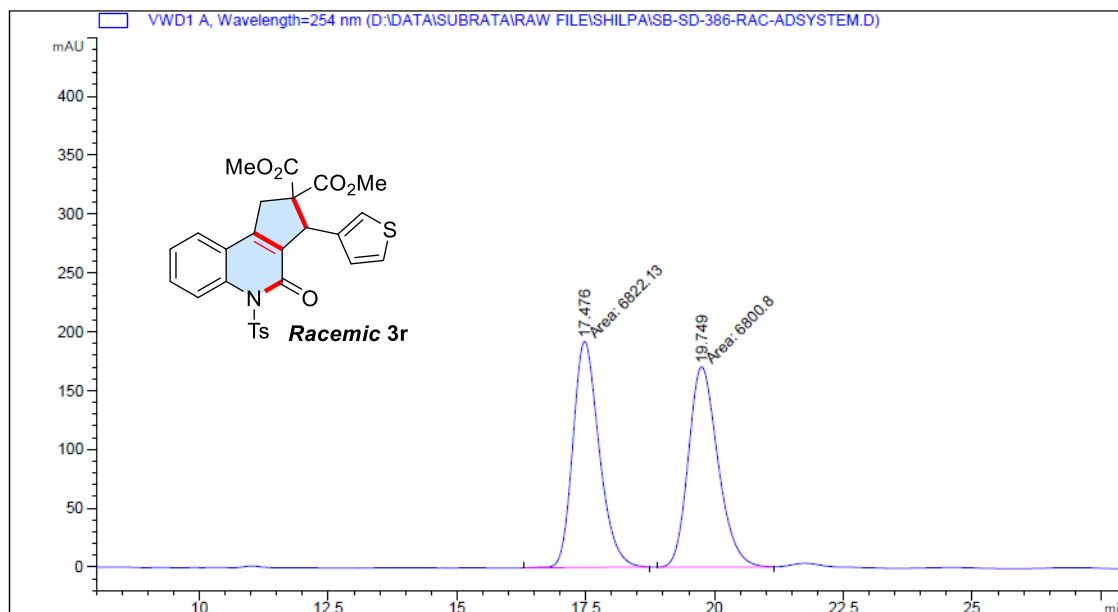

| Peak # | RetTime [min] | Type | Width [min] | Area [mAU*s] | Height [mAU] | Area %  |
|--------|---------------|------|-------------|--------------|--------------|---------|
| 1      | 17.476        | MM   | 0.5922      | 6822.13232   | 191.98679    | 50.0783 |
| 2      | 19.749        | MM   | 0.6663      | 6800.79932   | 170.11754    | 49.9217 |

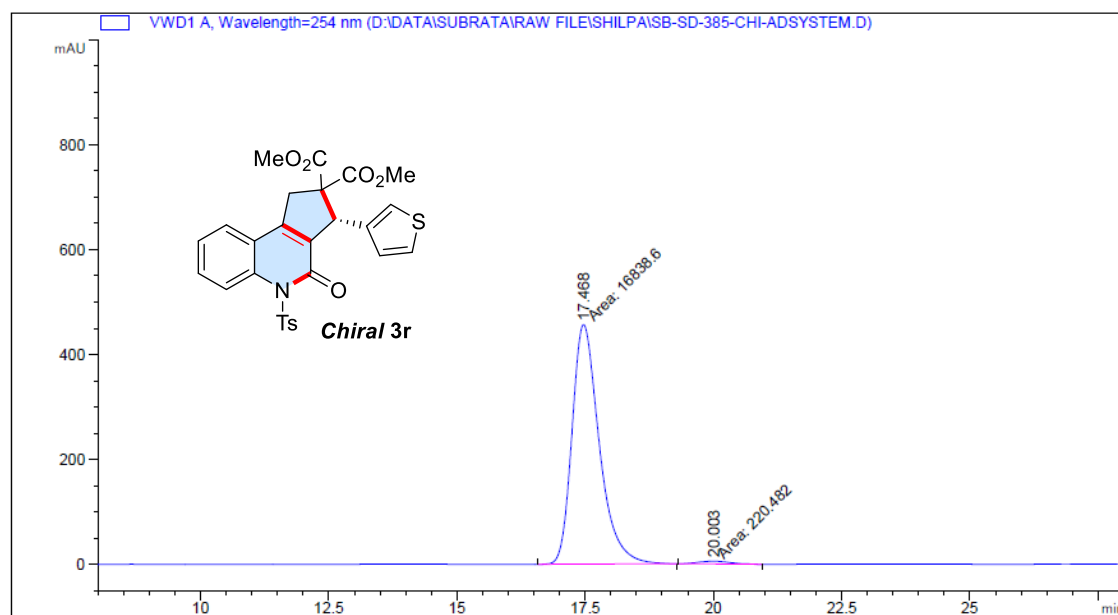

| Peak # | RetTime [min] | Type | Width [min] | Area [mAU*s] | Height [mAU] | Area %  |
|--------|---------------|------|-------------|--------------|--------------|---------|
| 1      | 17.468        | MM   | 0.6151      | 1.68386e4    | 456.25592    | 98.7075 |
| 2      | 20.003        | MM   | 0.7100      | 220.48221    | 5.17535      | 1.2925  |

Sample Info : CHIRALPAK AD, 30% IPA-HEXANE, 0.7 mL/min, 254 nm

**Dimethyl (*R*)-3-ethyl-4-oxo-5-tosyl-1,3,4,5-tetrahydro-2*H*-cyclopenta[*c*]quinoline-2,2-dicarboxylate (**3s**)**

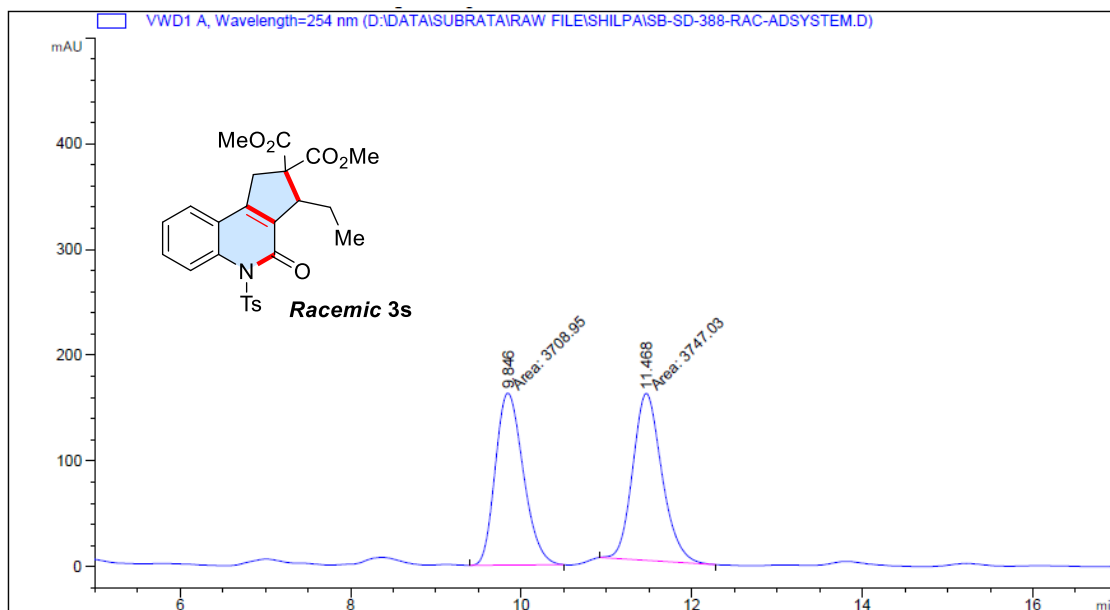

| Peak # | RetTime [min] | Type | Width [min] | Area [mAU*s] | Height [mAU] | Area %  |
|--------|---------------|------|-------------|--------------|--------------|---------|
| 1      | 9.846         | MM   | 0.3803      | 3708.94873   | 162.55838    | 49.7446 |
| 2      | 11.468        | MM   | 0.3959      | 3747.02905   | 157.73689    | 50.2554 |

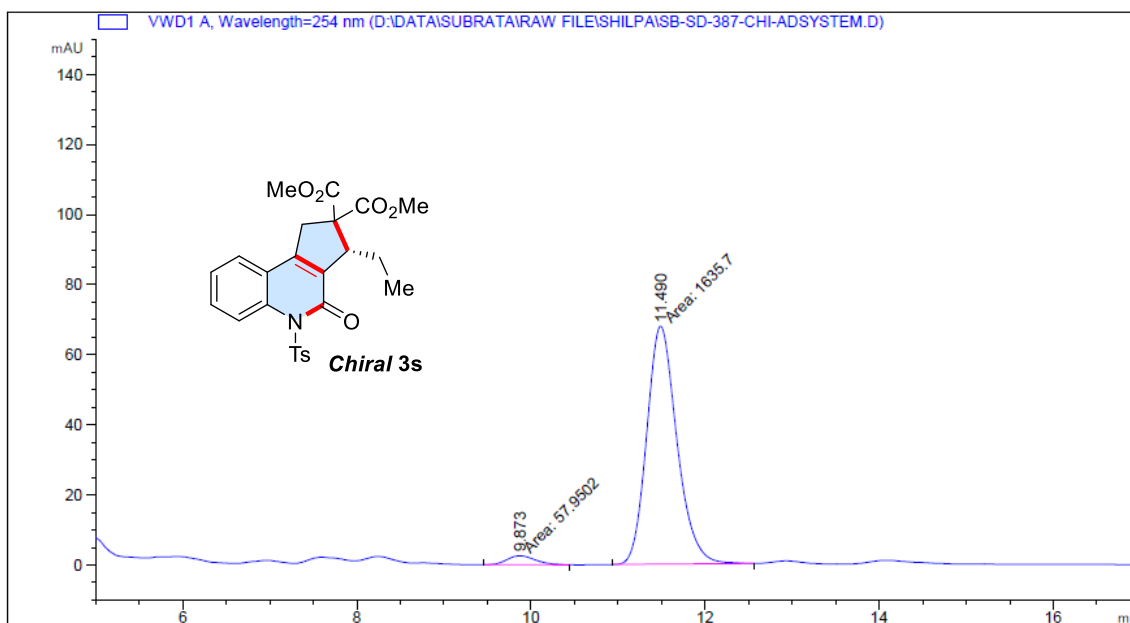

| Peak # | RetTime [min] | Type | Width [min] | Area [mAU*s] | Height [mAU] | Area %  |
|--------|---------------|------|-------------|--------------|--------------|---------|
| 1      | 9.873         | MM   | 0.3778      | 57.95025     | 2.55617      | 3.4216  |
| 2      | 11.490        | MM   | 0.4017      | 1635.70447   | 67.86875     | 96.5784 |

Sample Info : CHIRALPAK AD, 30% IPA-HEXANE, 0.7 mL/min, 254 nm

**Diethyl (R)-4-oxo-3-phenyl-5-tosyl-1,3,4,5-tetrahydro-2H-cyclopenta[c]quinoline-2,2-dicarboxylate (3t)**

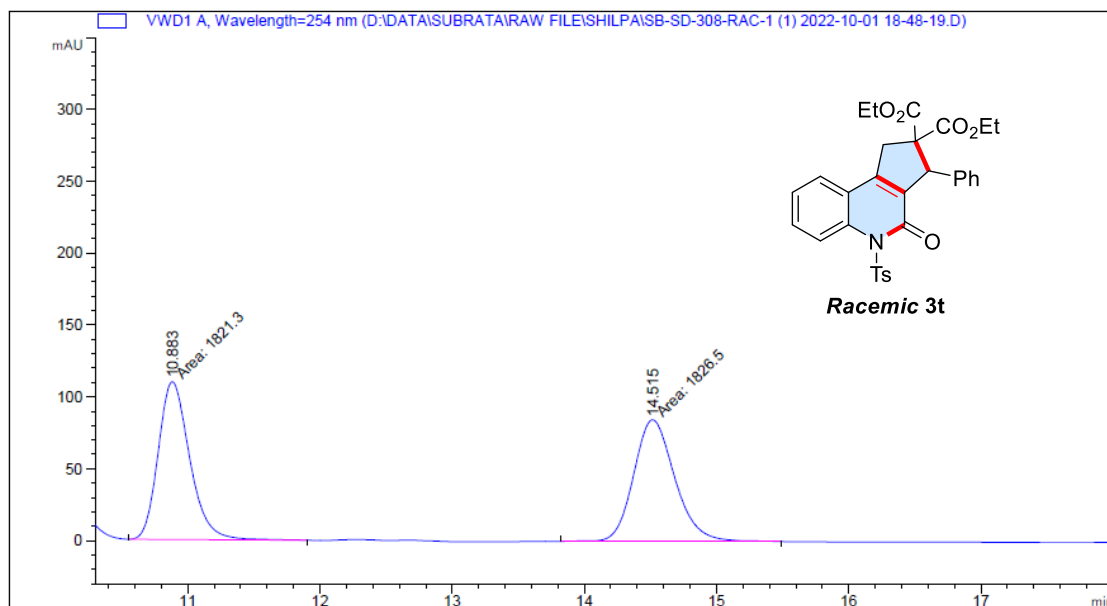

| Peak # | RetTime [min] | Type | Width [min] | Area [mAU*s] | Height [mAU] | Area %  |
|--------|---------------|------|-------------|--------------|--------------|---------|
| 1      | 10.883        | MM   | 0.2766      | 1821.29785   | 109.72702    | 49.9286 |
| 2      | 14.515        | MM   | 0.3602      | 1826.50342   | 84.50465     | 50.0714 |

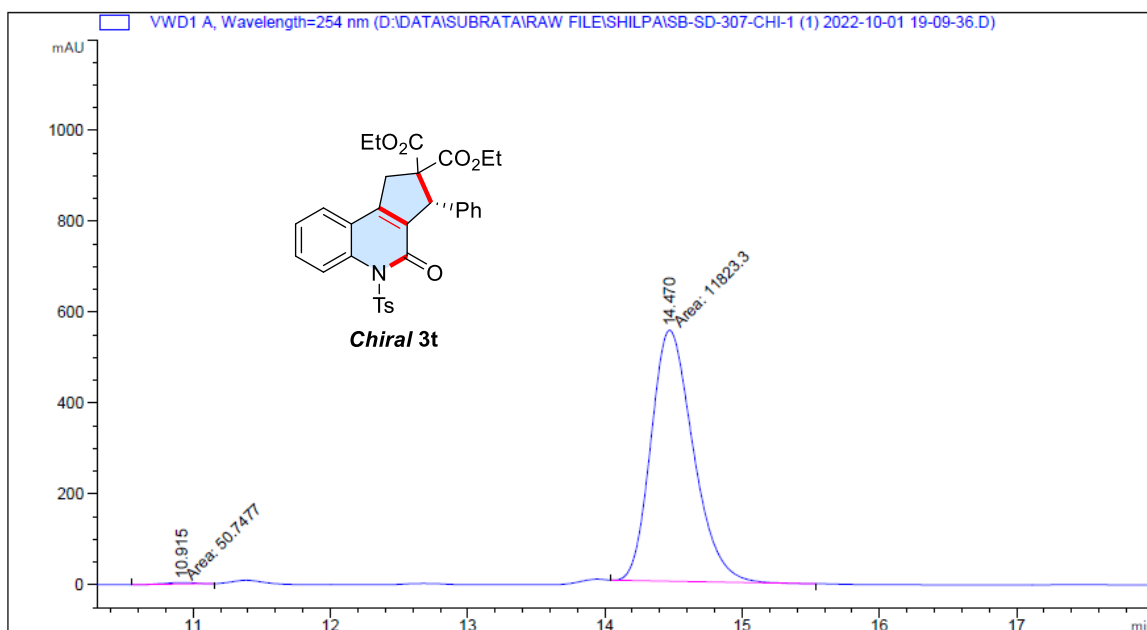

| Peak # | RetTime [min] | Type | Width [min] | Area [mAU*s] | Height [mAU] | Area %  |
|--------|---------------|------|-------------|--------------|--------------|---------|
| 1      | 10.915        | MM   | 0.2697      | 50.74766     | 3.13606      | 0.4274  |
| 2      | 14.470        | MM   | 0.3568      | 1.18233e4    | 552.24878    | 99.5726 |

Sample Info : CHIRALPAK IA, 30% IPA-HEXANE, 0.7 mL/min, 254 nm

**Diisopropyl (*R*)-4-oxo-3-phenyl-5-tosyl-1,3,4,5-tetrahydro-2*H*-cyclopenta[*c*]quinoline-2,2-dicarboxylate (**3u**)**

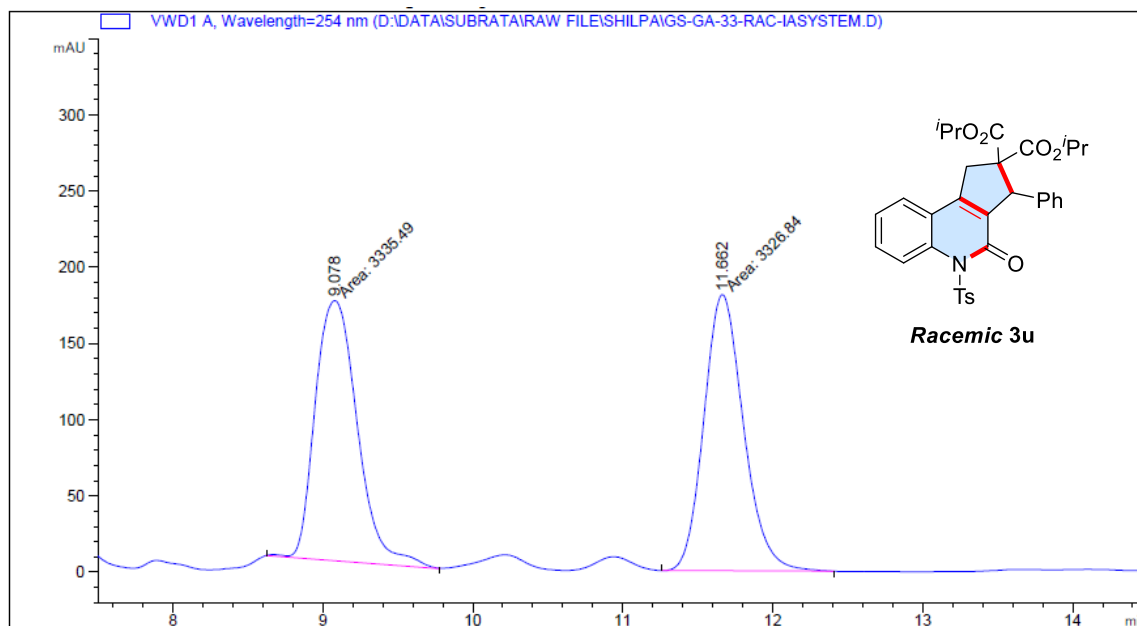

| Peak # | RetTime [min] | Type | Width [min] | Area [mAU*s] | Height [mAU] | Area %  |
|--------|---------------|------|-------------|--------------|--------------|---------|
| 1      | 9.078         | MM   | 0.3259      | 3335.48926   | 170.56017    | 50.0649 |
| 2      | 11.662        | MM   | 0.3062      | 3326.84399   | 181.07590    | 49.9351 |

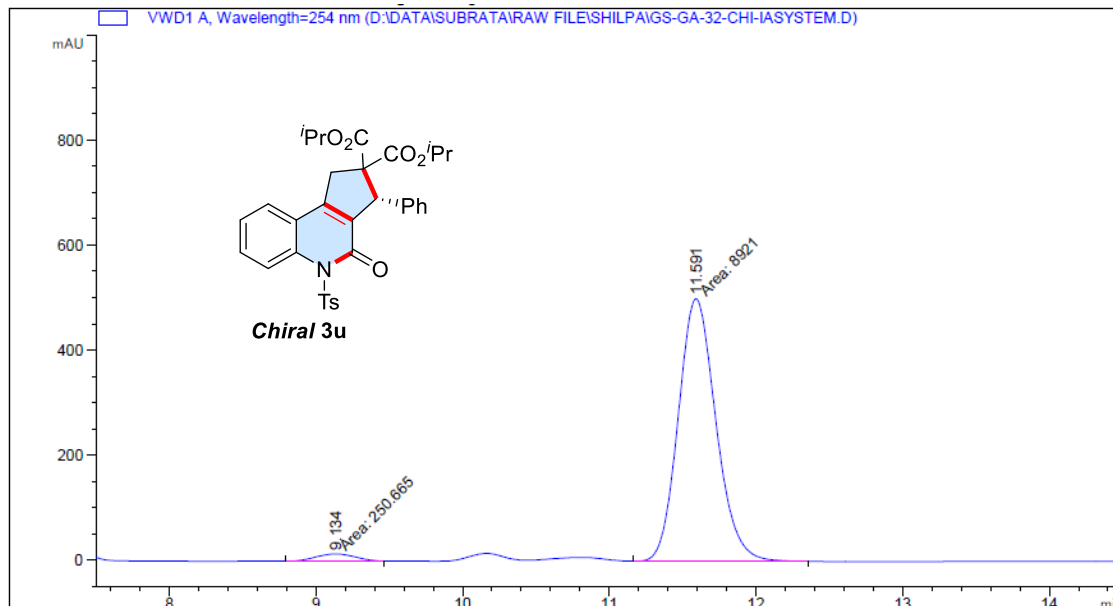

| Peak # | RetTime [min] | Type | Width [min] | Area [mAU*s] | Height [mAU] | Area %  |
|--------|---------------|------|-------------|--------------|--------------|---------|
| 1      | 9.134         | MM   | 0.3086      | 250.66473    | 13.53794     | 2.7330  |
| 2      | 11.591        | MM   | 0.2975      | 8921.00195   | 499.79984    | 97.2670 |

Sample Info : CHIRALPAK IA, 30% IPA-HEXANE, 0.7 mL/min, 254 nm



**Dibenzyl (R)-4-oxo-3-phenyl-5-tosyl-1,3,4,5-tetrahydro-2H-cyclopenta[c]quinoline-2,2-dicarboxylate (3v)**

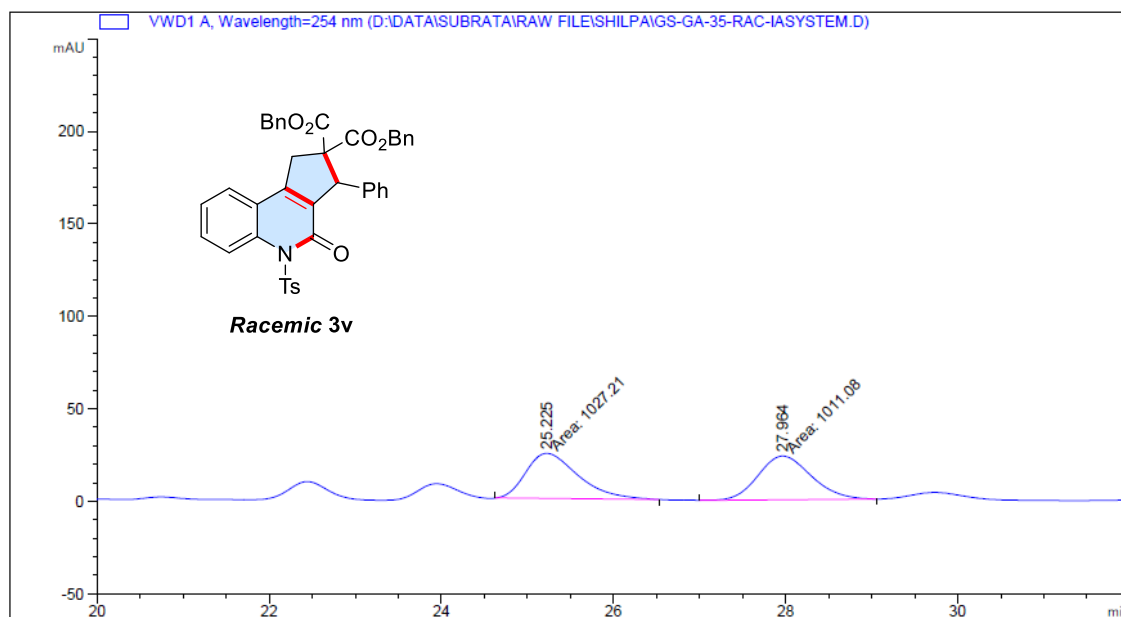

| Peak # | RetTime [min] | Type | Width [min] | Area [mAU*s] | Height [mAU] | Area %  |
|--------|---------------|------|-------------|--------------|--------------|---------|
| 1      | 25.225        | MM   | 0.7032      | 1027.20715   | 24.34580     | 50.3957 |
| 2      | 27.964        | MM   | 0.7141      | 1011.07660   | 23.59720     | 49.6043 |

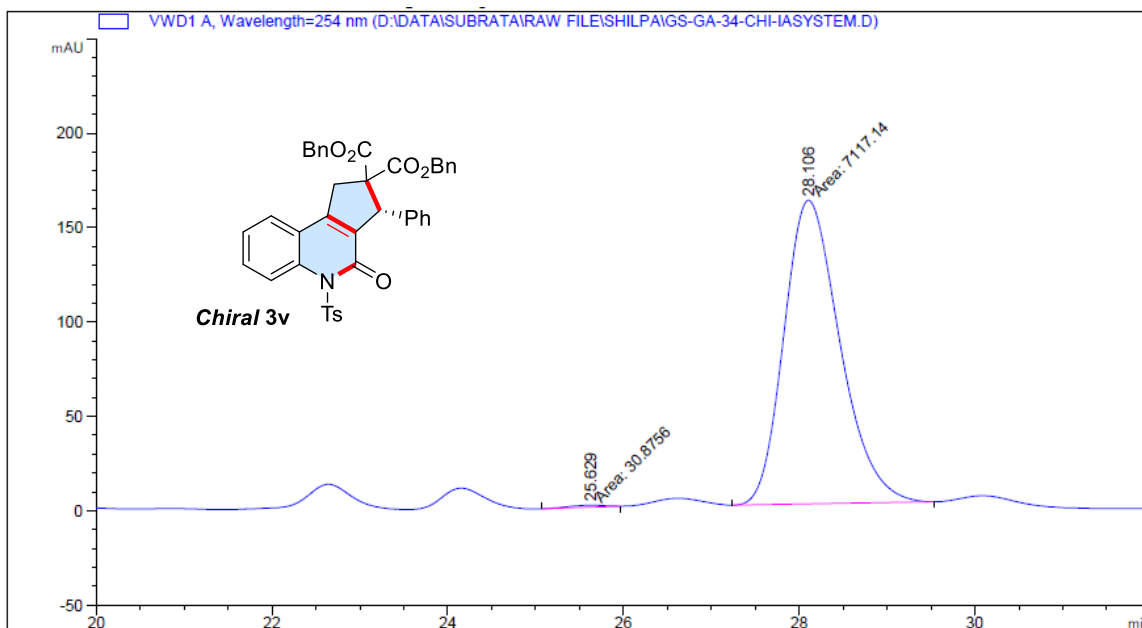

| Peak # | RetTime [min] | Type | Width [min] | Area [mAU*s] | Height [mAU] | Area %  |
|--------|---------------|------|-------------|--------------|--------------|---------|
| 1      | 25.629        | MM   | 0.4995      | 30.87560     | 1.03021      | 0.4319  |
| 2      | 28.106        | MM   | 0.7377      | 7117.13672   | 160.79282    | 99.5681 |

Sample Info : CHIRALPAK IA, 30% IPA-HEXANE, 0.7 mL/min, 254 nm

**Diallyl (R)-4-oxo-3-phenyl-5-tosyl-1,3,4,5-tetrahydro-2H-cyclopenta[c]quinoline-2,2-dicarboxylate (3w)**

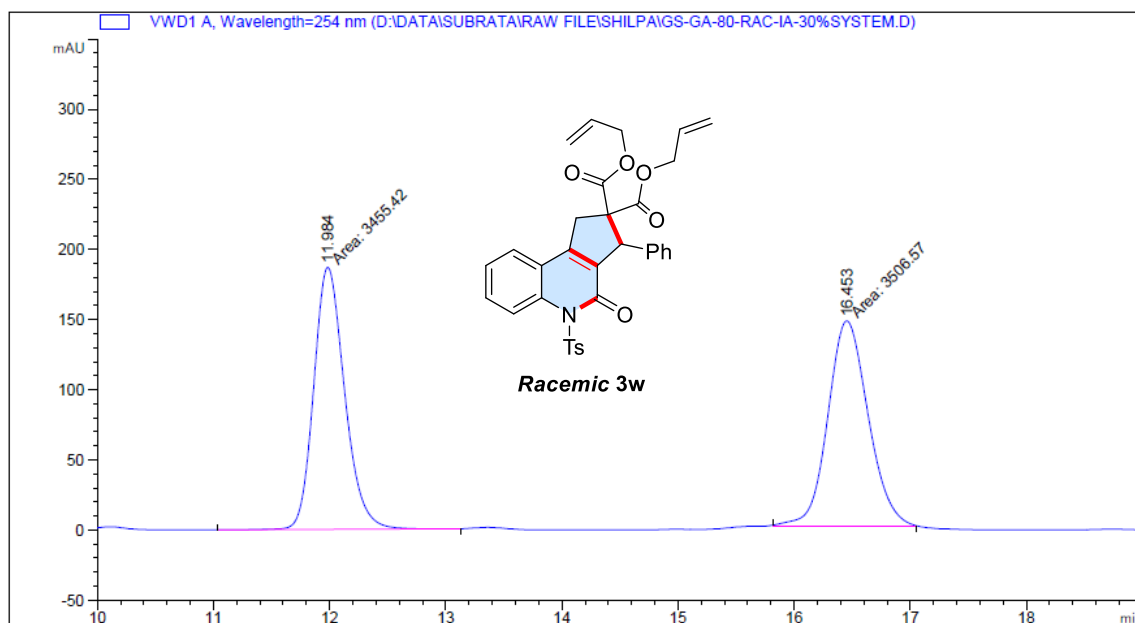

| Peak # | RetTime [min] | Type | Width [min] | Area [mAU*s] | Height [mAU] | Area %  |
|--------|---------------|------|-------------|--------------|--------------|---------|
| 1      | 11.984        | MM   | 0.3083      | 3455.41626   | 186.81927    | 49.6326 |
| 2      | 16.453        | MM   | 0.4005      | 3506.57104   | 145.92384    | 50.3674 |

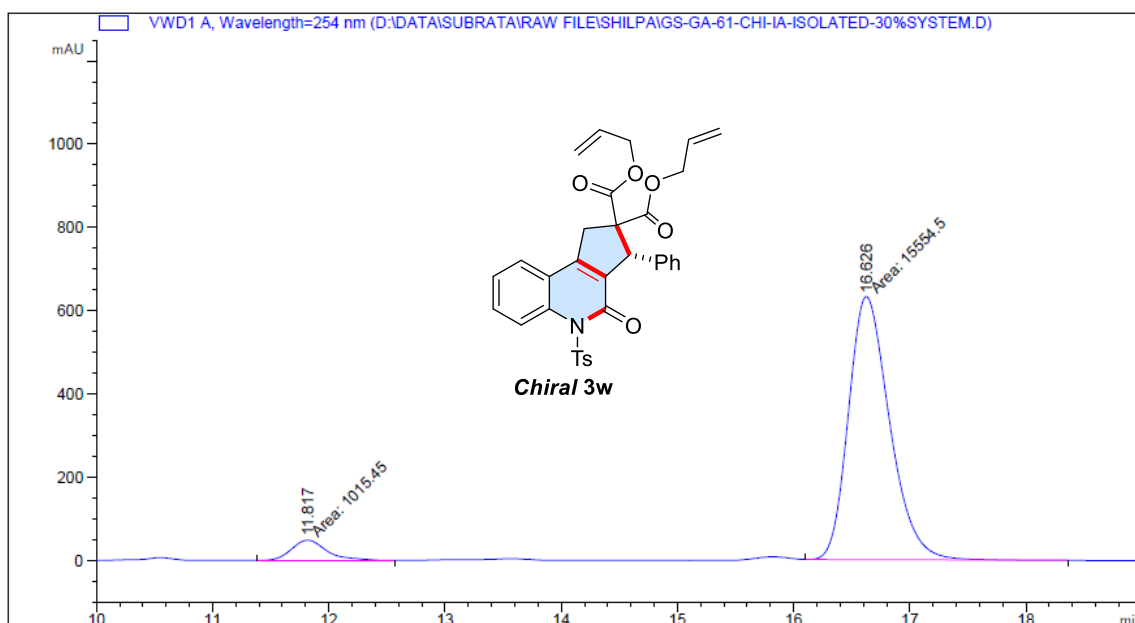

| Peak # | RetTime [min] | Type | Width [min] | Area [mAU*s] | Height [mAU] | Area %  |
|--------|---------------|------|-------------|--------------|--------------|---------|
| 1      | 11.817        | MM   | 0.3502      | 1015.45123   | 48.32890     | 6.1283  |
| 2      | 16.626        | MM   | 0.4101      | 1.55545e4    | 632.15192    | 93.8717 |

Sample Info : CHIRALPAK IA, 30% IPA-HEXANE, 0.7 mL/min, 254 nm

**Dimethyl (*R*)-5-((4-nitrophenyl)sulfonyl)-4-oxo-3-phenyl-1,3,4,5-tetrahydro-2*H*-cyclopenta[*c*]quinoline-2,2-dicarboxylate (**3x**)**

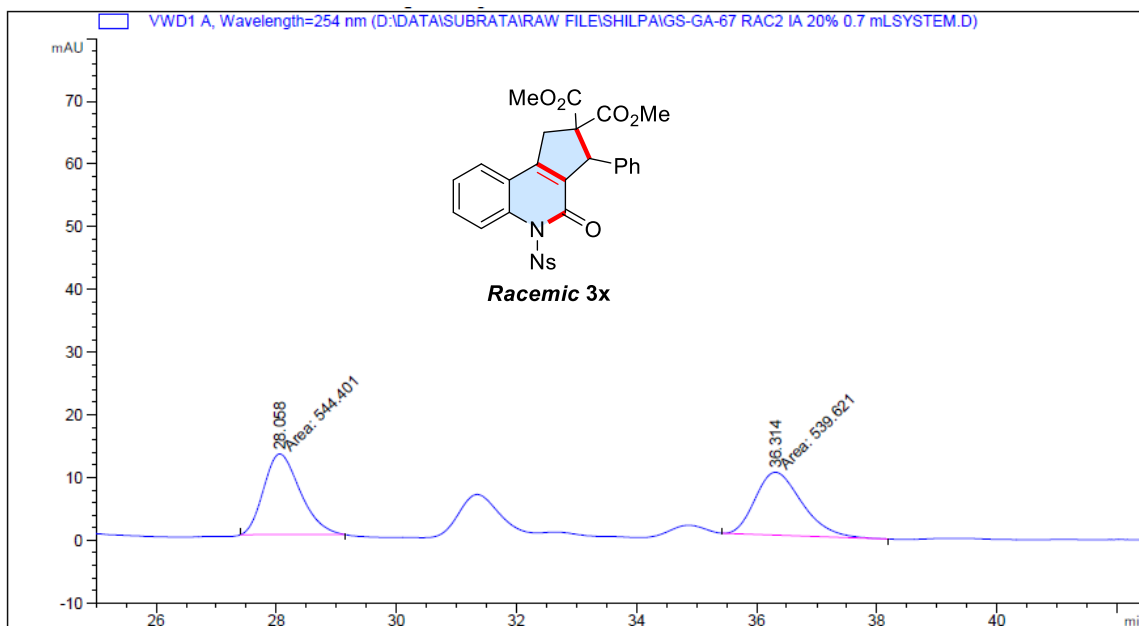

| Peak # | RetTime [min] | Type | Width [min] | Area [mAU*s] | Height [mAU] | Area %  |
|--------|---------------|------|-------------|--------------|--------------|---------|
| 1      | 28.058        | MM   | 0.7054      | 544.40063    | 12.86260     | 50.2204 |
| 2      | 36.314        | MM   | 0.8980      | 539.62146    | 10.01543     | 49.7796 |

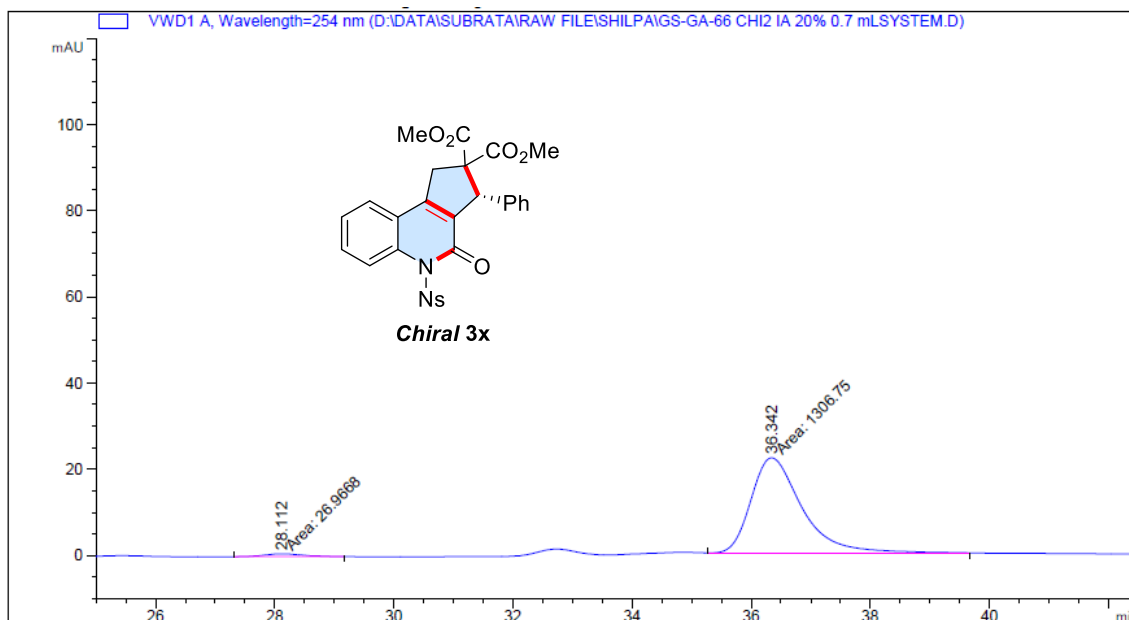

| Peak # | RetTime [min] | Type | Width [min] | Area [mAU*s] | Height [mAU] | Area %  |
|--------|---------------|------|-------------|--------------|--------------|---------|
| 1      | 28.112        | MM   | 0.7288      | 26.96685     | 6.16723e-1   | 2.0219  |
| 2      | 36.342        | MM   | 0.9876      | 1306.75012   | 22.05247     | 97.9781 |

Sample Info : CHIRALPAK IA , 20% IPA-HEXANE, 0.7 mL/min, 254 nm

**Dimethyl (*R*)-5-(methylsulfonyl)-4-oxo-3-phenyl-1,3,4,5-tetrahydro-2*H*-cyclopenta[*c*]quinoline-2,2-dicarboxylate (**3y**)**

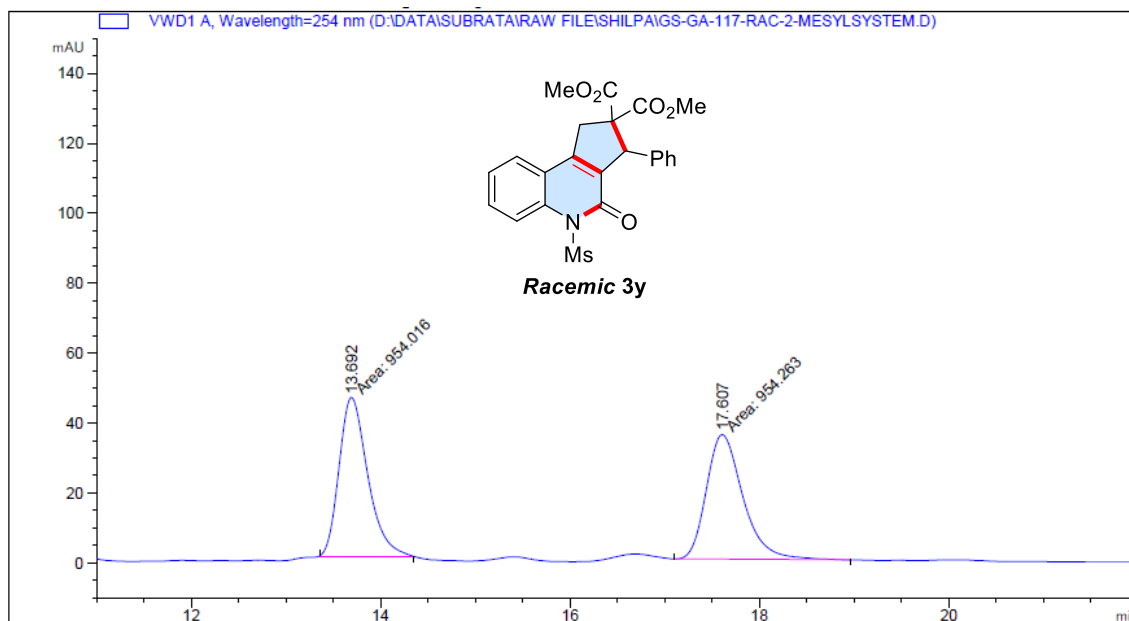

| Peak # | RetTime [min] | Type | Width [min] | Area [mAU*s] | Height [mAU] | Area %  |
|--------|---------------|------|-------------|--------------|--------------|---------|
| 1      | 13.692        | MM   | 0.3501      | 954.01648    | 45.42110     | 49.9935 |
| 2      | 17.607        | MM   | 0.4471      | 954.26270    | 35.57198     | 50.0065 |

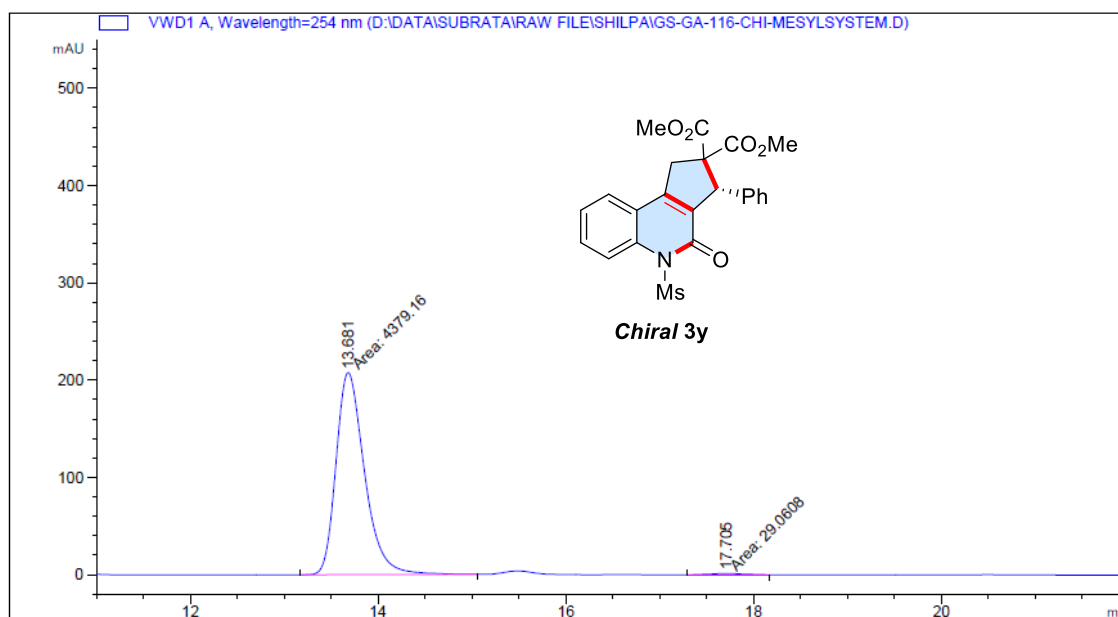

| Peak # | RetTime [min] | Type | Width [min] | Area [mAU*s] | Height [mAU] | Area %  |
|--------|---------------|------|-------------|--------------|--------------|---------|
| 1      | 13.681        | MM   | 0.3515      | 4379.16309   | 207.65285    | 99.3408 |
| 2      | 17.705        | MM   | 0.4050      | 29.06082     | 1.19582      | 0.6592  |

Sample Info : CHIRALPAK IA, 30% IPA-HEXANE, 0.7 mL/min, 254 nm

**Dimethyl (*R*)-4-oxo-3-phenyl-5-tosyl-1,3,4,5-tetrahydro-2*H*-cyclopenta[*c*][1,3]dioxolo [4,5-*g*]quinoline-2,2-dicarboxylate (**3z**)**

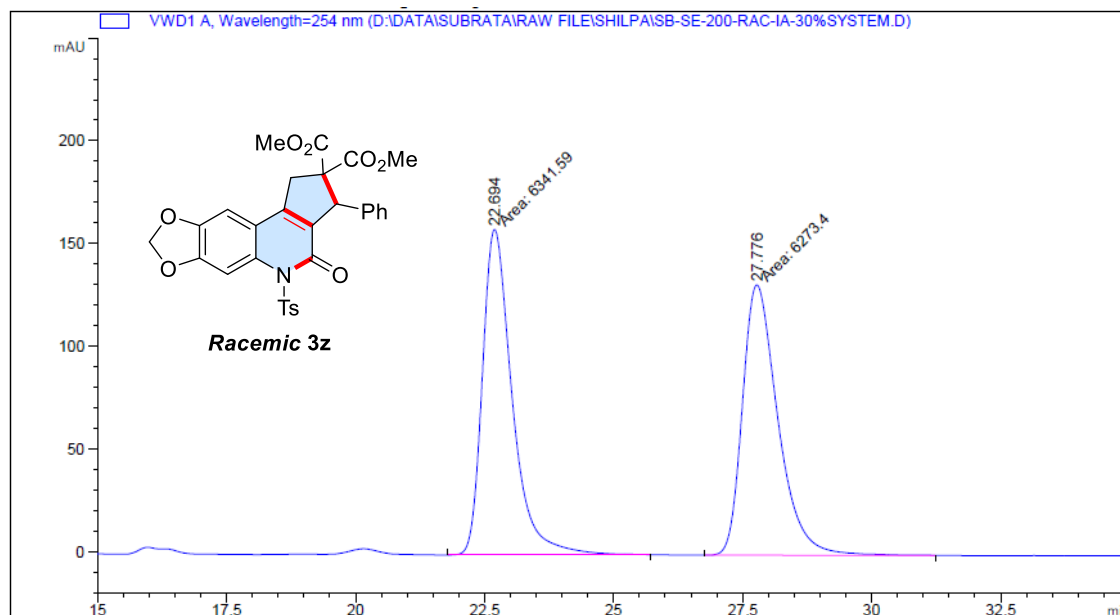

| Peak # | RetTime [min] | Type | Width [min] | Area [mAU*s] | Height [mAU] | Area %  |
|--------|---------------|------|-------------|--------------|--------------|---------|
| 1      | 22.694        | MM   | 0.6676      | 6341.58838   | 158.30623    | 50.2703 |
| 2      | 27.776        | MM   | 0.7949      | 6273.40186   | 131.52705    | 49.7297 |

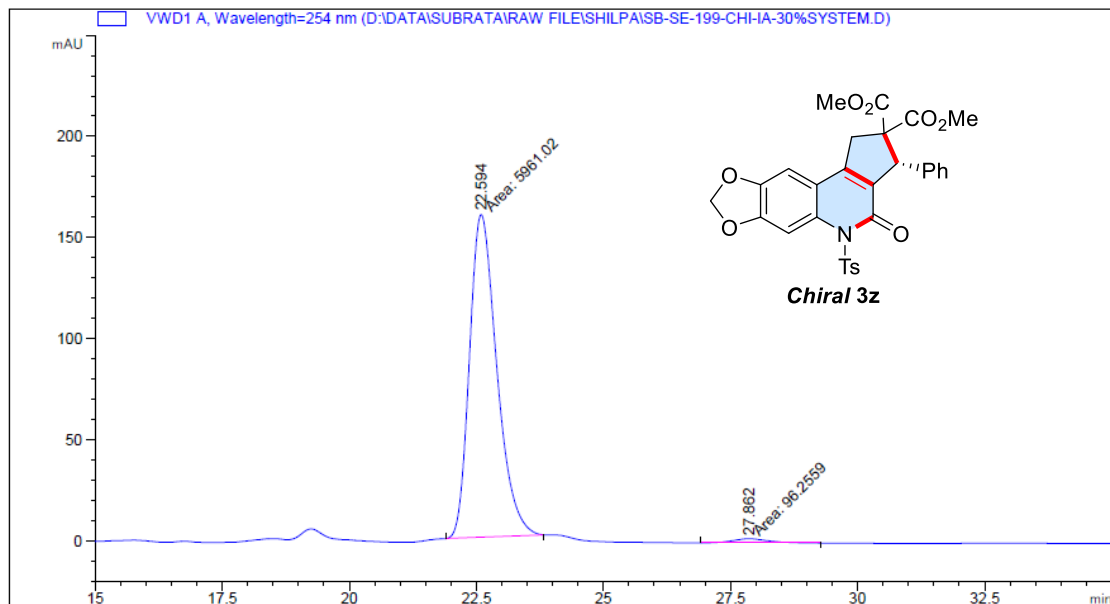

| Peak # | RetTime [min] | Type | Width [min] | Area [mAU*s] | Height [mAU] | Area %  |
|--------|---------------|------|-------------|--------------|--------------|---------|
| 1      | 22.594        | MM   | 0.6228      | 5961.02393   | 159.51743    | 98.4109 |
| 2      | 27.862        | MM   | 0.8021      | 96.25594     | 1.99996      | 1.5891  |

Sample Info : CHIRALPAK IA, 30% IPA-HEXANE, 0.7 mL/min, 254 nm

**Dimethyl (*R*)-8-chloro-4-oxo-3-phenyl-5-tosyl-1,3,4,5-tetrahydro-2*H*-cyclopenta[*c*]quinoline-2,2-dicarboxylate (**3aa**)**

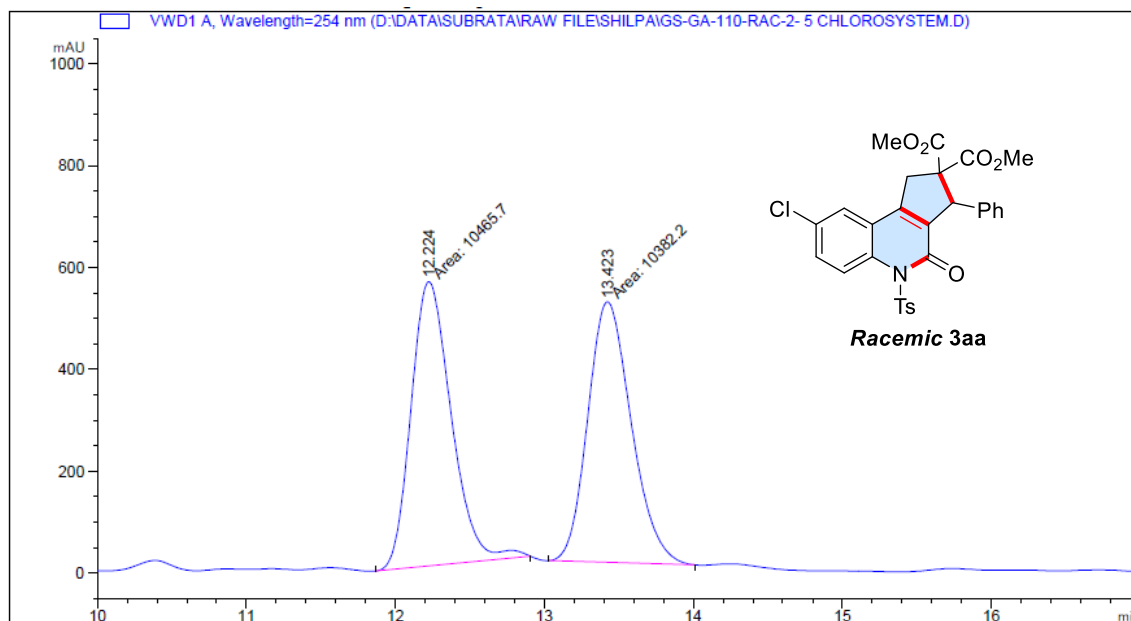

| Peak # | RetTime [min] | Type | Width [min] | Area [mAU*s] | Height [mAU] | Area %  |
|--------|---------------|------|-------------|--------------|--------------|---------|
| 1      | 12.224        | MM   | 0.3124      | 1.04657e4    | 558.32367    | 50.2002 |
| 2      | 13.423        | MM   | 0.3382      | 1.03822e4    | 511.61185    | 49.7998 |

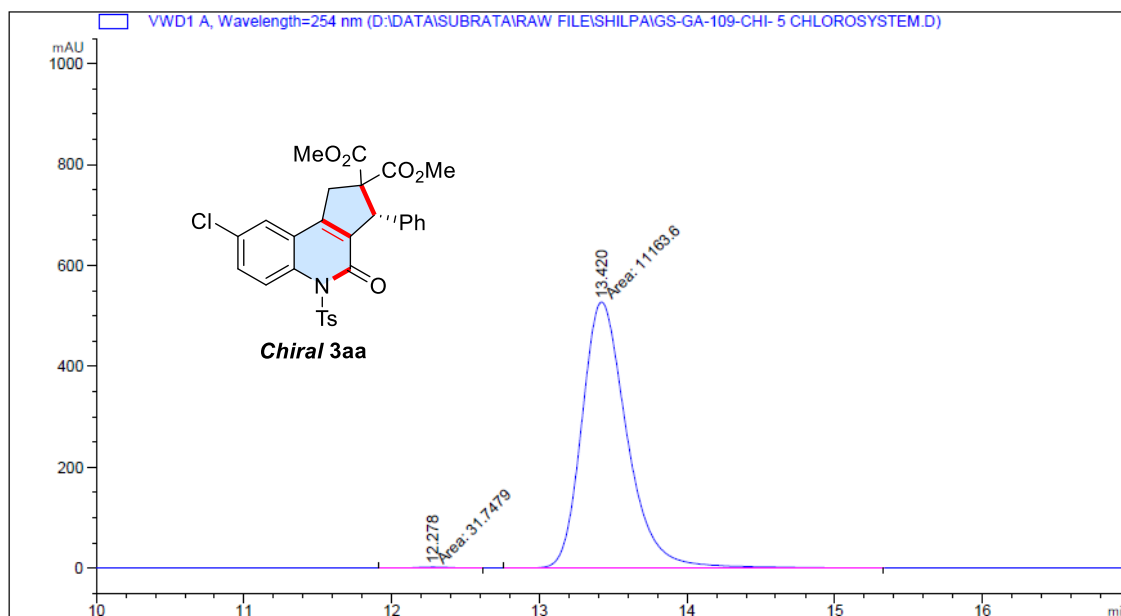

| Peak # | RetTime [min] | Type | Width [min] | Area [mAU*s] | Height [mAU] | Area %  |
|--------|---------------|------|-------------|--------------|--------------|---------|
| 1      | 12.278        | MM   | 0.2943      | 31.74793     | 1.79792      | 0.2836  |
| 2      | 13.420        | MM   | 0.3529      | 1.11636e4    | 527.16571    | 99.7164 |

Sample Info : CHIRALPAK IA, 30% IPA-HEXANE, 0.7 mL/min, 254 nm

**Dimethyl (*R*)-8-methyl-4-oxo-3-phenyl-5-tosyl-1,3,4,5-tetrahydro-2*H*-cyclopenta[*c*]quinoline-2,2-dicarboxylate (**3ab**)**

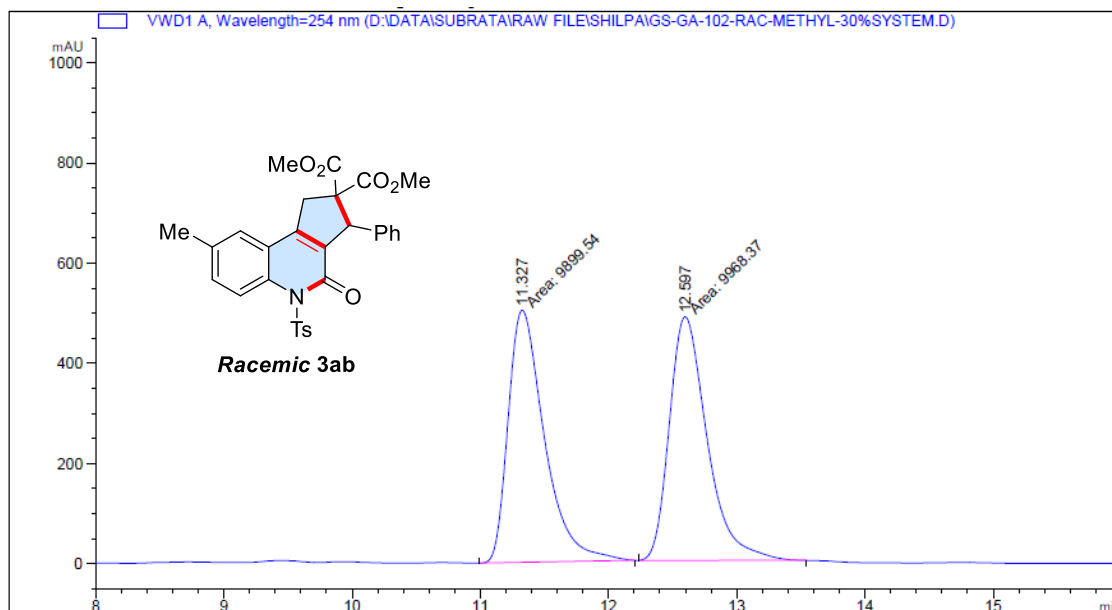

| Peak # | RetTime [min] | Type | Width [min] | Area [mAU*s] | Height [mAU] | Area %  |
|--------|---------------|------|-------------|--------------|--------------|---------|
| 1      | 11.327        | MM   | 0.3277      | 9899.53613   | 503.50262    | 49.8268 |
| 2      | 12.597        | MM   | 0.3416      | 9968.37012   | 486.38901    | 50.1732 |

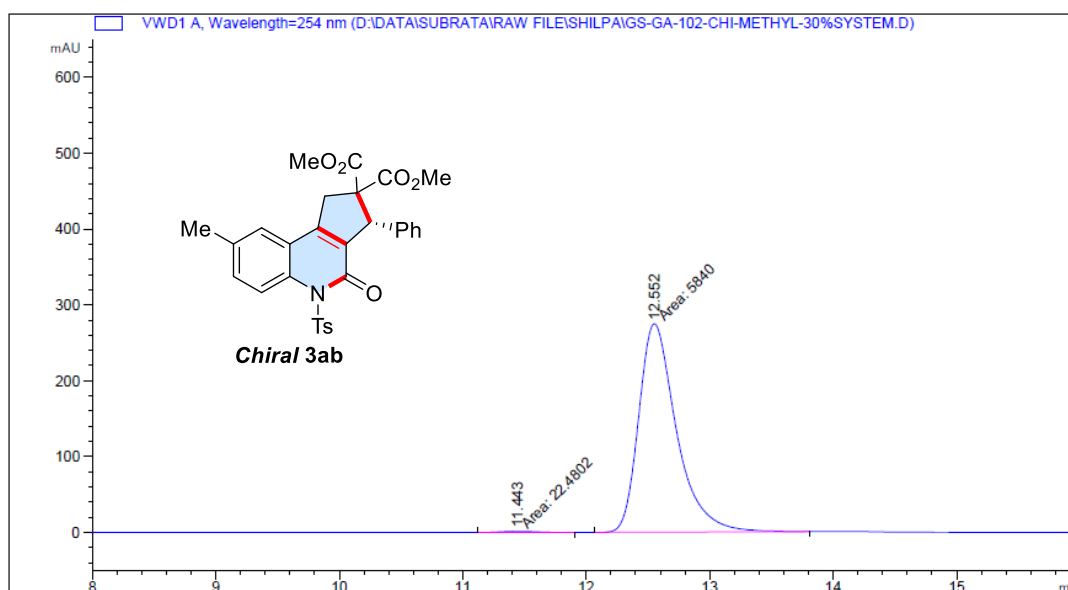

| Peak # | RetTime [min] | Type | Width [min] | Area [mAU*s] | Height [mAU] | Area %  |
|--------|---------------|------|-------------|--------------|--------------|---------|
| 1      | 11.443        | MM   | 0.3204      | 22.48019     | 1.16949      | 0.3835  |
| 2      | 12.552        | MM   | 0.3542      | 5840.00488   | 274.78635    | 99.6165 |

Sample Info : CHIRALPAK IA, 30% IPA-HEXANE, 0.7 mL/min, 254 nm

**Dimethyl (3*S*,3*aR*,9*bR*)-3*a*,9*b*-dihydroxy-4-oxo-3-phenyl-5-tosyl-1,3,3*a*,4,5,9*b*-hexahydro-2*H*-cyclopenta[*c*]quinoline-2,2-dicarboxylate (9*a*)**

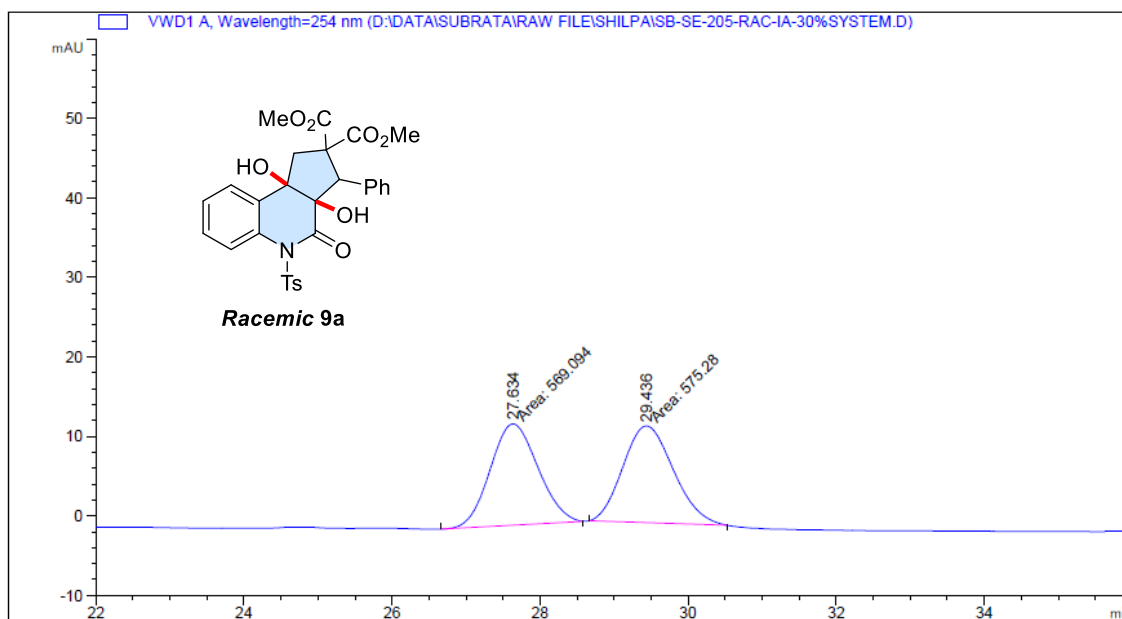

| Peak # | RetTime [min] | Type | Width [min] | Area [mAU*s] | Height [mAU] | Area %  |
|--------|---------------|------|-------------|--------------|--------------|---------|
| 1      | 27.634        | MM   | 0.7451      | 569.09448    | 12.72990     | 49.7298 |
| 2      | 29.436        | MM   | 0.7889      | 575.27960    | 12.15399     | 50.2702 |

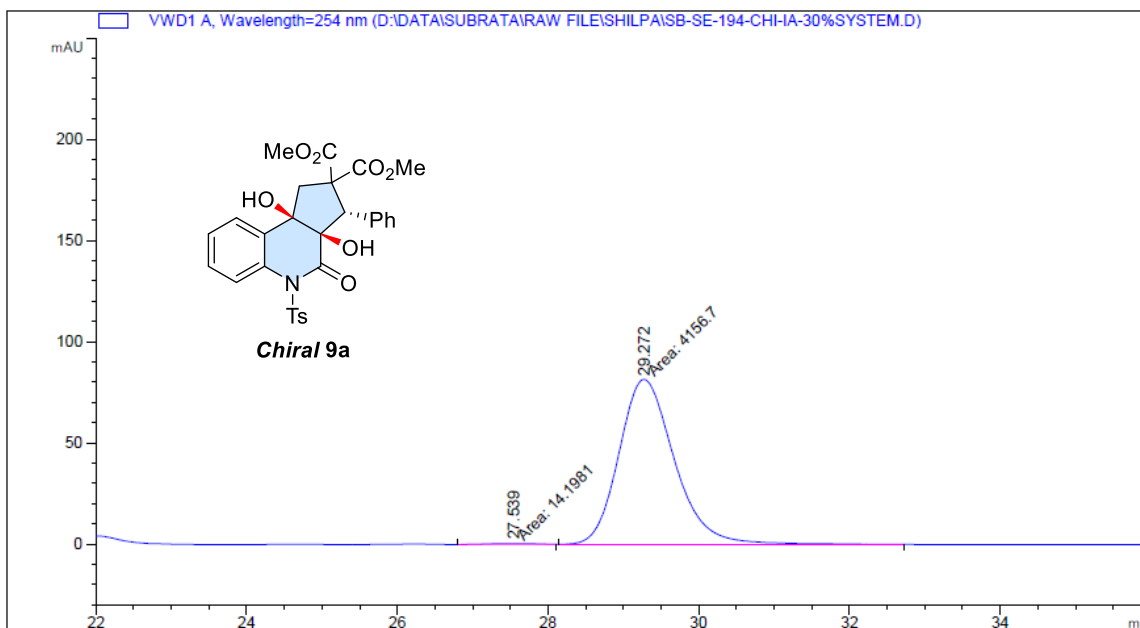

| Peak # | RetTime [min] | Type | Width [min] | Area [mAU*s] | Height [mAU] | Area %  |
|--------|---------------|------|-------------|--------------|--------------|---------|
| 1      | 27.539        | MM   | 0.6494      | 14.19809     | 3.64413e-1   | 0.3404  |
| 2      | 29.272        | MM   | 0.8510      | 4156.70215   | 81.40401     | 99.6596 |

Sample Info : CHIRALPAK IA, 30% IPA-HEXANE, 0.7 mL/min, 254 nm



**Dimethyl (*R*)-3-phenyl-4-(tosyloxy)-1,3-dihydro-2*H*-cyclopenta[*c*]quinoline-2,2-dicarboxylate (**10a**)**

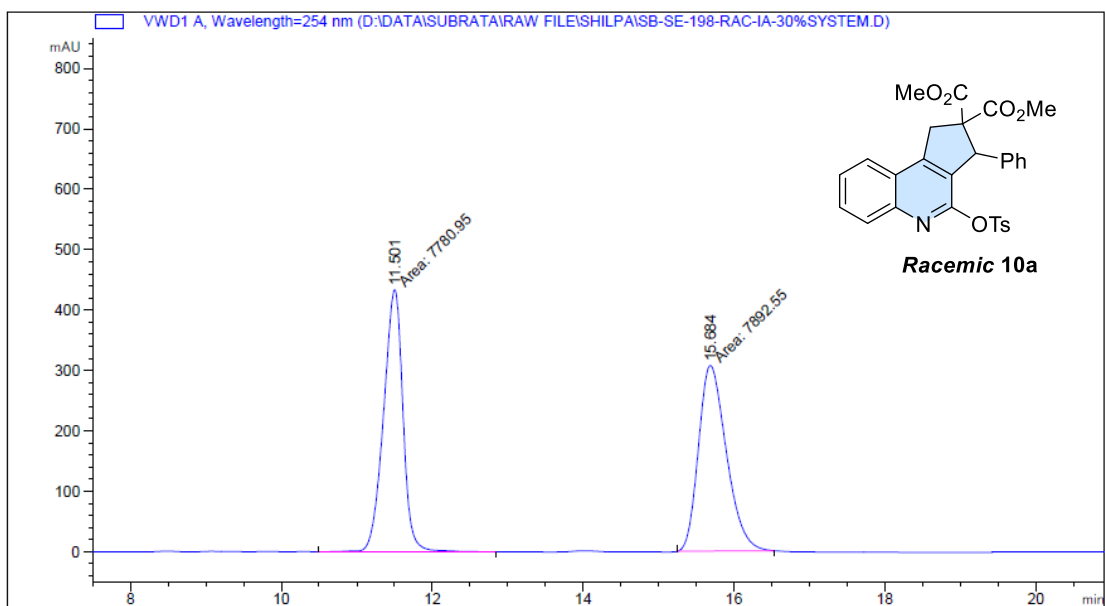

| Peak # | RetTime [min] | Type | Width [min] | Area [mAU*s] | Height [mAU] | Area %  |
|--------|---------------|------|-------------|--------------|--------------|---------|
| 1      | 11.501        | MM   | 0.2989      | 7780.95361   | 433.84683    | 49.6440 |
| 2      | 15.684        | MM   | 0.4281      | 7892.55273   | 307.30032    | 50.3560 |

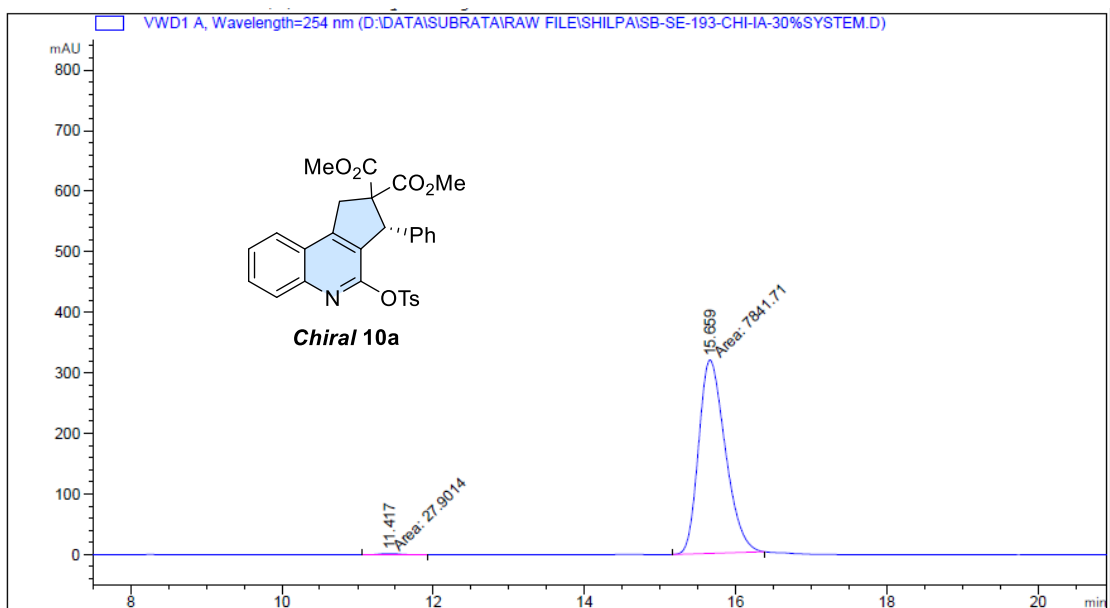

| Peak # | RetTime [min] | Type | Width [min] | Area [mAU*s] | Height [mAU] | Area %  |
|--------|---------------|------|-------------|--------------|--------------|---------|
| 1      | 11.417        | MM   | 0.2740      | 27.90139     | 1.69728      | 0.3545  |
| 2      | 15.659        | MM   | 0.4094      | 7841.71045   | 319.21915    | 99.6455 |

Sample Info : CHIRALPAK IA, 30% IPA-HEXANE, 0.7 mL/min, 254 nm

**Dimethyl (*R*)-4-oxo-3-phenyl-1,3,4,5-tetrahydro-2*H*-cyclopenta[*c*]quinoline-2,2-dicarboxylate (11a)**

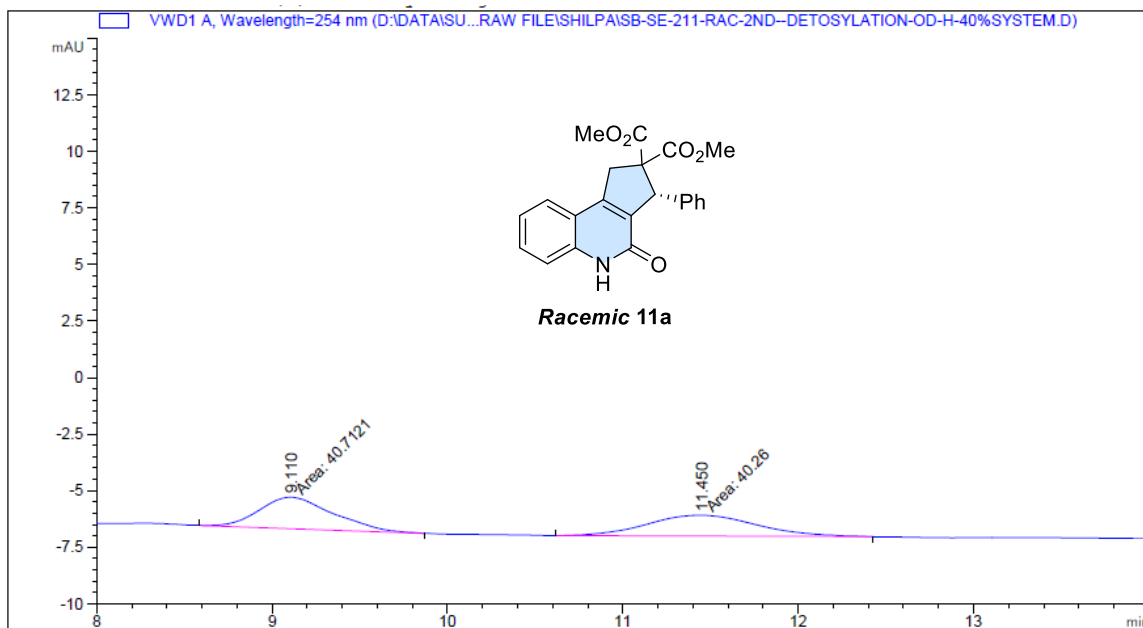

| Peak # | RetTime [min] | Type | Width [min] | Area [mAU*s] | Height [mAU] | Area %  |
|--------|---------------|------|-------------|--------------|--------------|---------|
| 1      | 9.110         | MM   | 0.4890      | 40.71211     | 1.38759      | 50.2792 |
| 2      | 11.450        | MM   | 0.7314      | 40.25999     | 9.17388e-1   | 49.7208 |

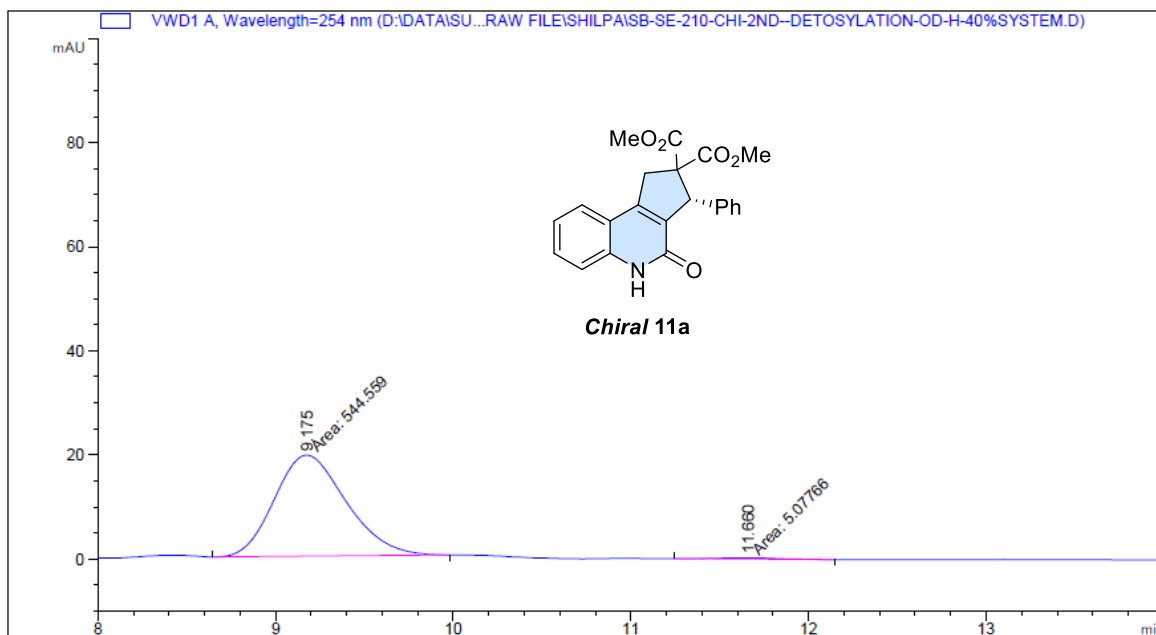

| Peak # | RetTime [min] | Type | Width [min] | Area [mAU*s] | Height [mAU] | Area %  |
|--------|---------------|------|-------------|--------------|--------------|---------|
| 1      | 9.175         | MM   | 0.4678      | 544.55878    | 19.40111     | 99.0762 |
| 2      | 11.660        | MM   | 0.4017      | 5.07766      | 2.10675e-1   | 0.9238  |

Sample Info : CHIRALCEL OD-H, 40% IPA-HEXANE, 0.7 mL/min, 254 nm
